# Supplementary material
Source: publisher figshare collection journal article supplement (https://acs.figshare.com/ndownloader/files/9158833)
Supplement: Supplementary file 1 [file 9158833]

data_lilx_0331
_audit_creation_date              2017-04-14
_audit_creation_method
;
Olex2 1.2
(compiled 2017.03.28 svn.r3405 for OlexSys, GUI svn.r5335)
;
_shelx_SHELXL_version_number      '2014/7'
_publ_contact_author_address      ?
_publ_contact_author_email        ?
_publ_contact_author_id_orcid     ?
_publ_contact_author_name         ''
_publ_contact_author_phone        ?
_publ_section_references
;
Dolomanov, O.V., Bourhis, L.J., Gildea, R.J, Howard, J.A.K. & Puschmann, H.
 (2009), J. Appl. Cryst. 42, 339-341.

Sheldrick, G.M. (2008). Acta Cryst. A64, 112-122.

Sheldrick, G.M. (2015). Acta Cryst. C71, 3-8.
;
_chemical_name_common             ?
_chemical_name_systematic         ?
_chemical_formula_moiety          'C39 H38 N2 O2 S'
_chemical_formula_sum             'C39 H38 N2 O2 S'
_chemical_formula_weight          598.77
_chemical_melting_point           ?
_chemical_oxdiff_formula          'C H N O S'
loop_
  _atom_type_symbol
  _atom_type_description
  _atom_type_scat_dispersion_real
  _atom_type_scat_dispersion_imag
  _atom_type_scat_source
 'C' 'C' 0.0033 0.0016 'International Tables Vol C Tables 4.2.6.8 and 6.1.1.4'
 'H' 'H' 0.0000 0.0000 'International Tables Vol C Tables 4.2.6.8 and 6.1.1.4'
 'N' 'N' 0.0061 0.0033 'International Tables Vol C Tables 4.2.6.8 and 6.1.1.4'
 'O' 'O' 0.0106 0.0060 'International Tables Vol C Tables 4.2.6.8 and 6.1.1.4'
 'S' 'S' 0.1246 0.1234 'International Tables Vol C Tables 4.2.6.8 and 6.1.1.4'

_shelx_space_group_comment
;
The symmetry employed for this shelxl refinement is uniquely defined
by the following loop, which should always be used as a source of
symmetry information in preference to the above space-group names.
They are only intended as comments.
;
_space_group_crystal_system       'monoclinic'
_space_group_IT_number            14
_space_group_name_H-M_alt         'P 1 21/n 1'
_space_group_name_Hall            '-P 2yn'
loop_
  _space_group_symop_operation_xyz
 'x, y, z'
 '-x+1/2, y+1/2, -z+1/2'
 '-x, -y, -z'
 'x-1/2, -y-1/2, z-1/2'

_cell_length_a                    14.3783(11)
_cell_length_b                    16.6690(9)
_cell_length_c                    14.5602(8)
_cell_angle_alpha                 90
_cell_angle_beta                  109.563(8)
_cell_angle_gamma                 90
_cell_volume                      3288.2(4)
_cell_formula_units_Z             4
_cell_measurement_reflns_used     2416
_cell_measurement_temperature     287.76(10)
_cell_measurement_theta_max       22.6050
_cell_measurement_theta_min       3.4430
_shelx_estimated_absorpt_T_max    ?
_shelx_estimated_absorpt_T_min    ?
_exptl_absorpt_coefficient_mu     0.135
_exptl_absorpt_correction_T_max   1.00000
_exptl_absorpt_correction_T_min   0.88984
_exptl_absorpt_correction_type    multi-scan
_exptl_absorpt_process_details
;
CrysAlisPro, Agilent Technologies,
Version 1.171.36.28 (release 01-02-2013 CrysAlis171 .NET)
(compiled Feb  1 2013,16:14:44)
Empirical absorption correction using spherical harmonics,
 implemented in SCALE3 ABSPACK scaling algorithm.
;
_exptl_absorpt_special_details    ?
_exptl_crystal_colour             'clear light colourless'
_exptl_crystal_colour_lustre      clear
_exptl_crystal_colour_modifier    light
_exptl_crystal_colour_primary     colourless
_exptl_crystal_density_diffrn     1.210
_exptl_crystal_density_meas       ?
_exptl_crystal_density_method     ?
_exptl_crystal_description        block
_exptl_crystal_F_000              1272
_exptl_crystal_size_max           0.22
_exptl_crystal_size_mid           0.18
_exptl_crystal_size_min           0.14
_exptl_transmission_factor_max    ?
_exptl_transmission_factor_min    ?
_diffrn_reflns_av_R_equivalents   0.0432
_diffrn_reflns_av_unetI/netI      0.0711
_diffrn_reflns_Laue_measured_fraction_full 0.997
_diffrn_reflns_Laue_measured_fraction_max 0.997
_diffrn_reflns_limit_h_max        17
_diffrn_reflns_limit_h_min        -17
_diffrn_reflns_limit_k_max        17
_diffrn_reflns_limit_k_min        -20
_diffrn_reflns_limit_l_max        17
_diffrn_reflns_limit_l_min        -17
_diffrn_reflns_number             14129
_diffrn_reflns_point_group_measured_fraction_full 0.997
_diffrn_reflns_point_group_measured_fraction_max 0.997
_diffrn_reflns_theta_full         25.242
_diffrn_reflns_theta_max          26.020
_diffrn_reflns_theta_min          3.447
_diffrn_ambient_temperature       287.76(10)
_diffrn_detector_area_resol_mean  16.0733
_diffrn_measured_fraction_theta_full 0.997
_diffrn_measured_fraction_theta_max 0.997
_diffrn_measurement_details
;
#__ type_ start__ end____ width___ exp.time_
  1 omega  -18.00   15.00   1.0000    7.0000
omega____ theta____ kappa____ phi______ frames
    -      -19.5055  -99.0000    0.0000 33

#__ type_ start__ end____ width___ exp.time_
  2 omega   47.00  102.00   1.0000    7.0000
omega____ theta____ kappa____ phi______ frames
    -       22.7867  178.0000  -30.0000 55

#__ type_ start__ end____ width___ exp.time_
  3 omega  -27.00    2.00   1.0000    7.0000
omega____ theta____ kappa____ phi______ frames
    -       22.7867  -57.0000  -60.0000 29

#__ type_ start__ end____ width___ exp.time_
  4 omega   16.00   43.00   1.0000    7.0000
omega____ theta____ kappa____ phi______ frames
    -       22.7867  -57.0000  -60.0000 27

#__ type_ start__ end____ width___ exp.time_
  5 omega  -53.00   66.00   1.0000    7.0000
omega____ theta____ kappa____ phi______ frames
    -       22.7867  -19.0000  -30.0000 119
;
_diffrn_measurement_device_type   'SuperNova, Dual, Cu at zero, Eos'
_diffrn_measurement_method        '\w scans'
_diffrn_orient_matrix_UB_11       -0.0170706000
_diffrn_orient_matrix_UB_12       -0.0399584000
_diffrn_orient_matrix_UB_13       -0.0006962000
_diffrn_orient_matrix_UB_21       -0.0280456000
_diffrn_orient_matrix_UB_22       0.0116566000
_diffrn_orient_matrix_UB_23       0.0296625000
_diffrn_orient_matrix_UB_31       -0.0407576000
_diffrn_orient_matrix_UB_32       0.0088147000
_diffrn_orient_matrix_UB_33       -0.0423686000
_diffrn_radiation_monochromator   mirror
_diffrn_radiation_type            MoK\a
_diffrn_radiation_wavelength      0.71073
_diffrn_source                    'SuperNova (Mo) X-ray Source'
_reflns_Friedel_coverage          0.000
_reflns_Friedel_fraction_full     .
_reflns_Friedel_fraction_max      .
_reflns_number_gt                 3955
_reflns_number_total              6452
_reflns_odcompleteness_completeness 99.67
_reflns_odcompleteness_iscentric  1
_reflns_odcompleteness_theta      26.32
_reflns_special_details
;
 Reflections were merged by SHELXL according to the crystal
 class for the calculation of statistics and refinement.
 
 _reflns_Friedel_fraction is defined as the number of unique
 Friedel pairs measured divided by the number that would be
 possible theoretically, ignoring centric projections and
 systematic absences.
;
_reflns_threshold_expression      'I > 2\s(I)'
_computing_cell_refinement
;
CrysAlisPro, Agilent Technologies,
Version 1.171.36.28 (release 01-02-2013 CrysAlis171 .NET)
(compiled Feb  1 2013,16:14:44)
;
_computing_data_collection
;
CrysAlisPro, Agilent Technologies,
Version 1.171.36.28 (release 01-02-2013 CrysAlis171 .NET)
(compiled Feb  1 2013,16:14:44)
;
_computing_data_reduction
;
CrysAlisPro, Agilent Technologies,
Version 1.171.36.28 (release 01-02-2013 CrysAlis171 .NET)
(compiled Feb  1 2013,16:14:44)
;
_computing_molecular_graphics     'Olex2 (Dolomanov et al., 2009)'
_computing_publication_material   'Olex2 (Dolomanov et al., 2009)'
_computing_structure_refinement   'ShelXL (Sheldrick, 2015)'
_computing_structure_solution     'ShelXS (Sheldrick, 2008)'
_refine_diff_density_max          0.190
_refine_diff_density_min          -0.343
_refine_diff_density_rms          0.044
_refine_ls_extinction_coef        .
_refine_ls_extinction_method      none
_refine_ls_goodness_of_fit_ref    0.942
_refine_ls_hydrogen_treatment     constr
_refine_ls_matrix_type            full
_refine_ls_number_parameters      398
_refine_ls_number_reflns          6452
_refine_ls_number_restraints      0
_refine_ls_R_factor_all           0.1018
_refine_ls_R_factor_gt            0.0596
_refine_ls_restrained_S_all       0.942
_refine_ls_shift/su_max           0.001
_refine_ls_shift/su_mean          0.000
_refine_ls_structure_factor_coef  Fsqd
_refine_ls_weighting_details
'w=1/[\s^2^(Fo^2^)+(0.0862P)^2^+0.7845P] where P=(Fo^2^+2Fc^2^)/3'
_refine_ls_weighting_scheme       calc
_refine_ls_wR_factor_gt           0.1433
_refine_ls_wR_factor_ref          0.1841
_refine_special_details           ?
_olex2_refinement_description
;
1. Fixed Uiso
 At 1.2 times of:
  All C(H) groups, All C(H,H) groups
 At 1.5 times of:
  All C(H,H,H) groups
2.a Secondary CH2 refined with riding coordinates:
 C1(H1A,H1B), C5(H5A,H5B), C6(H6A,H6B), C7(H7A,H7B), C14(H14A,H14B)
2.b Aromatic/amide H refined with riding coordinates:
 C3(H3), C9(H9), C10(H10), C11(H11), C12(H12), C13(H13), C16(H16), C17(H17),
 C18(H18), C19(H19), C20(H20), C22(H22), C23(H23), C24(H24), C25(H25), C26(H26),
  C28(H28), C29(H29), C30(H30), C31(H31), C32(H32), C34(H34), C35(H35),
 C37(H37), C38(H38)
2.c Idealised Me refined as rotating group:
 C39(H39A,H39B,H39C)
;
_atom_sites_solution_hydrogens    geom
_atom_sites_solution_primary      direct
_atom_sites_solution_secondary    ?
loop_
  _atom_site_label
  _atom_site_type_symbol
  _atom_site_fract_x
  _atom_site_fract_y
  _atom_site_fract_z
  _atom_site_U_iso_or_equiv
  _atom_site_adp_type
  _atom_site_occupancy
  _atom_site_site_symmetry_order
  _atom_site_calc_flag
  _atom_site_refinement_flags_posn
  _atom_site_refinement_flags_adp
  _atom_site_refinement_flags_occupancy
  _atom_site_disorder_assembly
  _atom_site_disorder_group
 S1 S 0.63382(6) 0.04023(4) 0.87068(4) 0.0476(2) Uani 1 1 d . . . . .
 O1 O 0.59151(18) -0.00006(11) 0.93336(13) 0.0641(6) Uani 1 1 d . . . . .
 O2 O 0.73839(15) 0.04764(12) 0.89790(14) 0.0652(6) Uani 1 1 d . . . . .
 N1 N 0.59273(16) 0.13227(12) 0.85863(15) 0.0432(5) Uani 1 1 d . . . . .
 N2 N 0.34387(16) 0.22527(13) 0.94600(15) 0.0458(5) Uani 1 1 d . . . . .
 C1 C 0.6315(2) 0.18899(15) 0.80276(18) 0.0435(6) Uani 1 1 d . . . . .
 H1A H 0.6166 0.1710 0.7360 0.052 Uiso 1 1 calc R . . . .
 H1B H 0.7024 0.1951 0.8324 0.052 Uiso 1 1 calc R . . . .
 C2 C 0.57780(18) 0.26855(15) 0.80667(17) 0.0387(6) Uani 1 1 d . . . . .
 C3 C 0.48702(19) 0.23654(16) 0.82462(18) 0.0429(6) Uani 1 1 d . . . . .
 H3 H 0.4300 0.2666 0.8149 0.051 Uiso 1 1 calc R . . . .
 C4 C 0.49717(19) 0.16113(15) 0.85574(17) 0.0407(6) Uani 1 1 d . . . . .
 C5 C 0.4295(2) 0.11296(16) 0.8917(2) 0.0505(7) Uani 1 1 d . . . . .
 H5A H 0.4633 0.0994 0.9595 0.061 Uiso 1 1 calc R . . . .
 H5B H 0.4145 0.0632 0.8551 0.061 Uiso 1 1 calc R . . . .
 C6 C 0.3336(2) 0.15455(18) 0.8835(2) 0.0536(7) Uani 1 1 d . . . . .
 H6A H 0.3016 0.1707 0.8163 0.064 Uiso 1 1 calc R . . . .
 H6B H 0.2906 0.1163 0.8997 0.064 Uiso 1 1 calc R . . . .
 C7 C 0.3703(2) 0.20316(18) 1.04940(19) 0.0570(8) Uani 1 1 d . . . . .
 H7A H 0.4207 0.1619 1.0646 0.068 Uiso 1 1 calc R . . . .
 H7B H 0.3128 0.1811 1.0609 0.068 Uiso 1 1 calc R . . . .
 C8 C 0.4080(2) 0.27404(19) 1.11604(19) 0.0550(7) Uani 1 1 d . . . . .
 C9 C 0.4717(2) 0.32856(18) 1.1001(2) 0.0571(8) Uani 1 1 d . . . . .
 H9 H 0.4904 0.3233 1.0451 0.068 Uiso 1 1 calc R . . . .
 C10 C 0.5090(3) 0.3911(2) 1.1633(2) 0.0745(10) Uani 1 1 d . . . . .
 H10 H 0.5526 0.4273 1.1510 0.089 Uiso 1 1 calc R . . . .
 C11 C 0.4821(4) 0.4002(3) 1.2441(3) 0.1017(14) Uani 1 1 d . . . . .
 H11 H 0.5067 0.4426 1.2869 0.122 Uiso 1 1 calc R . . . .
 C12 C 0.4194(5) 0.3469(4) 1.2610(3) 0.142(2) Uani 1 1 d . . . . .
 H12 H 0.4004 0.3529 1.3157 0.171 Uiso 1 1 calc R . . . .
 C13 C 0.3827(4) 0.2833(3) 1.1983(3) 0.1099(16) Uani 1 1 d . . . . .
 H13 H 0.3406 0.2465 1.2120 0.132 Uiso 1 1 calc R . . . .
 C14 C 0.2528(2) 0.2727(2) 0.9153(2) 0.0573(8) Uani 1 1 d . . . . .
 H14A H 0.2533 0.3090 0.9675 0.069 Uiso 1 1 calc R . . . .
 H14B H 0.1968 0.2370 0.9038 0.069 Uiso 1 1 calc R . . . .
 C15 C 0.2403(2) 0.32056(18) 0.82451(19) 0.0483(7) Uani 1 1 d . . . . .
 C16 C 0.1683(2) 0.3008(2) 0.7370(2) 0.0691(9) Uani 1 1 d . . . . .
 H16 H 0.1263 0.2577 0.7339 0.083 Uiso 1 1 calc R . . . .
 C17 C 0.1593(3) 0.3455(3) 0.6542(2) 0.0848(12) Uani 1 1 d . . . . .
 H17 H 0.1123 0.3309 0.5952 0.102 Uiso 1 1 calc R . . . .
 C18 C 0.2176(3) 0.4102(2) 0.6572(2) 0.0785(11) Uani 1 1 d . . . . .
 H18 H 0.2097 0.4404 0.6014 0.094 Uiso 1 1 calc R . . . .
 C19 C 0.2886(3) 0.4304(2) 0.7443(2) 0.0726(10) Uani 1 1 d . . . . .
 H19 H 0.3293 0.4745 0.7475 0.087 Uiso 1 1 calc R . . . .
 C20 C 0.2996(2) 0.38549(18) 0.8266(2) 0.0576(8) Uani 1 1 d . . . . .
 H20 H 0.3482 0.3995 0.8849 0.069 Uiso 1 1 calc R . . . .
 C21 C 0.63352(19) 0.32129(16) 0.89473(18) 0.0432(6) Uani 1 1 d . . . . .
 C22 C 0.7037(2) 0.29069(18) 0.9771(2) 0.0570(8) Uani 1 1 d . . . . .
 H22 H 0.7216 0.2370 0.9786 0.068 Uiso 1 1 calc R . . . .
 C23 C 0.7481(3) 0.3389(2) 1.0580(2) 0.0674(9) Uani 1 1 d . . . . .
 H23 H 0.7949 0.3170 1.1129 0.081 Uiso 1 1 calc R . . . .
 C24 C 0.7237(3) 0.4178(2) 1.0573(2) 0.0697(9) Uani 1 1 d . . . . .
 H24 H 0.7542 0.4500 1.1111 0.084 Uiso 1 1 calc R . . . .
 C25 C 0.6542(3) 0.4490(2) 0.9771(2) 0.0758(10) Uani 1 1 d . . . . .
 H25 H 0.6367 0.5028 0.9762 0.091 Uiso 1 1 calc R . . . .
 C26 C 0.6092(2) 0.40087(18) 0.8964(2) 0.0620(9) Uani 1 1 d . . . . .
 H26 H 0.5615 0.4230 0.8423 0.074 Uiso 1 1 calc R . . . .
 C27 C 0.55723(19) 0.31445(15) 0.71153(18) 0.0414(6) Uani 1 1 d . . . . .
 C28 C 0.4635(2) 0.32860(19) 0.6483(2) 0.0613(8) Uani 1 1 d . . . . .
 H28 H 0.4095 0.3098 0.6634 0.074 Uiso 1 1 calc R . . . .
 C29 C 0.4483(3) 0.3705(2) 0.5623(2) 0.0798(11) Uani 1 1 d . . . . .
 H29 H 0.3842 0.3805 0.5211 0.096 Uiso 1 1 calc R . . . .
 C30 C 0.5261(4) 0.3971(2) 0.5377(2) 0.0816(12) Uani 1 1 d . . . . .
 H30 H 0.5154 0.4238 0.4789 0.098 Uiso 1 1 calc R . . . .
 C31 C 0.6198(3) 0.3844(2) 0.5993(3) 0.0792(11) Uani 1 1 d . . . . .
 H31 H 0.6734 0.4033 0.5833 0.095 Uiso 1 1 calc R . . . .
 C32 C 0.6351(2) 0.34354(19) 0.6856(2) 0.0628(8) Uani 1 1 d . . . . .
 H32 H 0.6993 0.3354 0.7274 0.075 Uiso 1 1 calc R . . . .
 C33 C 0.5922(2) -0.00770(16) 0.75655(18) 0.0446(6) Uani 1 1 d . . . . .
 C34 C 0.6549(2) -0.0172(2) 0.7037(2) 0.0619(8) Uani 1 1 d . . . . .
 H34 H 0.7182 0.0043 0.7263 0.074 Uiso 1 1 calc R . . . .
 C35 C 0.6230(2) -0.0590(2) 0.6168(2) 0.0701(10) Uani 1 1 d . . . . .
 H35 H 0.6660 -0.0657 0.5818 0.084 Uiso 1 1 calc R . . . .
 C36 C 0.5299(3) -0.09072(19) 0.5804(2) 0.0615(8) Uani 1 1 d . . . . .
 C37 C 0.4687(3) -0.0797(2) 0.6337(2) 0.0778(11) Uani 1 1 d . . . . .
 H37 H 0.4050 -0.1002 0.6101 0.093 Uiso 1 1 calc R . . . .
 C38 C 0.4984(2) -0.0390(2) 0.7215(2) 0.0674(9) Uani 1 1 d . . . . .
 H38 H 0.4554 -0.0328 0.7565 0.081 Uiso 1 1 calc R . . . .
 C39 C 0.4965(3) -0.1380(2) 0.4863(2) 0.0929(13) Uani 1 1 d . . . . .
 H39A H 0.5180 -0.1926 0.4992 0.139 Uiso 1 1 calc GR . . . .
 H39B H 0.5246 -0.1149 0.4412 0.139 Uiso 1 1 calc GR . . . .
 H39C H 0.4258 -0.1364 0.4589 0.139 Uiso 1 1 calc GR . . . .

loop_
  _atom_site_aniso_label
  _atom_site_aniso_U_11
  _atom_site_aniso_U_22
  _atom_site_aniso_U_33
  _atom_site_aniso_U_23
  _atom_site_aniso_U_13
  _atom_site_aniso_U_12
 S1 0.0627(5) 0.0350(4) 0.0395(4) -0.0021(3) 0.0098(3) 0.0113(3)
 O1 0.1109(18) 0.0407(11) 0.0456(10) 0.0086(9) 0.0326(11) 0.0124(12)
 O2 0.0526(12) 0.0621(14) 0.0623(12) -0.0112(10) -0.0054(10) 0.0195(11)
 N1 0.0536(13) 0.0296(11) 0.0489(12) -0.0008(9) 0.0204(10) 0.0043(11)
 N2 0.0491(13) 0.0433(13) 0.0476(12) -0.0004(10) 0.0197(10) 0.0019(11)
 C1 0.0492(15) 0.0389(14) 0.0464(14) -0.0015(11) 0.0212(12) 0.0013(13)
 C2 0.0402(13) 0.0317(13) 0.0461(13) 0.0020(11) 0.0171(11) 0.0009(12)
 C3 0.0454(14) 0.0359(14) 0.0511(15) 0.0052(12) 0.0210(12) 0.0033(13)
 C4 0.0484(15) 0.0343(14) 0.0412(13) -0.0038(11) 0.0172(11) 0.0015(13)
 C5 0.0649(18) 0.0333(14) 0.0604(16) -0.0040(12) 0.0306(14) -0.0051(14)
 C6 0.0557(17) 0.0471(17) 0.0639(17) -0.0042(14) 0.0280(14) -0.0105(15)
 C7 0.071(2) 0.0510(17) 0.0532(16) 0.0066(14) 0.0265(15) 0.0018(16)
 C8 0.0649(18) 0.0573(19) 0.0438(15) 0.0047(13) 0.0195(14) 0.0041(17)
 C9 0.0630(19) 0.0537(18) 0.0520(16) 0.0050(14) 0.0159(14) 0.0051(17)
 C10 0.084(2) 0.068(2) 0.062(2) -0.0043(17) 0.0123(18) -0.014(2)
 C11 0.132(4) 0.097(3) 0.072(2) -0.028(2) 0.028(3) -0.030(3)
 C12 0.196(6) 0.169(5) 0.096(3) -0.063(4) 0.094(4) -0.074(5)
 C13 0.146(4) 0.125(4) 0.084(3) -0.035(3) 0.071(3) -0.058(3)
 C14 0.0473(16) 0.067(2) 0.0618(17) -0.0039(15) 0.0243(14) 0.0034(16)
 C15 0.0446(15) 0.0508(17) 0.0461(14) -0.0069(13) 0.0109(12) 0.0074(14)
 C16 0.0538(18) 0.079(2) 0.064(2) -0.0119(18) 0.0065(16) -0.0032(18)
 C17 0.074(2) 0.108(3) 0.054(2) -0.012(2) -0.0034(17) 0.018(3)
 C18 0.100(3) 0.078(3) 0.054(2) 0.0091(18) 0.021(2) 0.034(2)
 C19 0.095(3) 0.055(2) 0.066(2) 0.0023(17) 0.0237(19) 0.007(2)
 C20 0.0672(19) 0.0492(17) 0.0485(16) -0.0096(14) 0.0085(14) 0.0077(17)
 C21 0.0448(14) 0.0409(15) 0.0440(14) -0.0029(12) 0.0149(12) -0.0014(13)
 C22 0.069(2) 0.0465(17) 0.0513(16) 0.0035(13) 0.0152(15) 0.0017(16)
 C23 0.074(2) 0.074(2) 0.0452(16) -0.0012(16) 0.0078(15) -0.007(2)
 C24 0.078(2) 0.068(2) 0.0596(19) -0.0200(17) 0.0189(18) -0.006(2)
 C25 0.090(3) 0.054(2) 0.076(2) -0.0179(17) 0.017(2) 0.015(2)
 C26 0.066(2) 0.0481(18) 0.0623(18) -0.0094(15) 0.0083(15) 0.0112(17)
 C27 0.0439(14) 0.0336(14) 0.0453(14) 0.0011(11) 0.0134(12) -0.0026(12)
 C28 0.0551(18) 0.062(2) 0.0612(18) 0.0087(15) 0.0115(15) -0.0055(16)
 C29 0.085(3) 0.082(3) 0.0544(19) 0.0151(18) -0.0012(18) 0.011(2)
 C30 0.124(4) 0.064(2) 0.056(2) 0.0123(16) 0.030(2) -0.012(2)
 C31 0.097(3) 0.079(3) 0.072(2) 0.0158(19) 0.042(2) -0.017(2)
 C32 0.0589(18) 0.067(2) 0.0636(18) 0.0136(16) 0.0225(15) -0.0064(17)
 C33 0.0528(16) 0.0355(14) 0.0467(14) -0.0038(12) 0.0184(12) 0.0045(13)
 C34 0.0490(16) 0.078(2) 0.0597(17) -0.0208(16) 0.0191(14) 0.0008(17)
 C35 0.063(2) 0.093(3) 0.0607(18) -0.0252(18) 0.0280(16) 0.004(2)
 C36 0.076(2) 0.0571(19) 0.0517(16) -0.0167(14) 0.0214(16) -0.0057(18)
 C37 0.073(2) 0.090(3) 0.076(2) -0.040(2) 0.0334(18) -0.036(2)
 C38 0.070(2) 0.077(2) 0.0686(19) -0.0264(17) 0.0411(17) -0.0215(19)
 C39 0.114(3) 0.093(3) 0.065(2) -0.038(2) 0.023(2) -0.010(3)

_geom_special_details
;
 All esds (except the esd in the dihedral angle between two l.s. planes)
 are estimated using the full covariance matrix.  The cell esds are taken
 into account individually in the estimation of esds in distances, angles
 and torsion angles; correlations between esds in cell parameters are only
 used when they are defined by crystal symmetry.  An approximate (isotropic)
 treatment of cell esds is used for estimating esds involving l.s. planes.
;
loop_
  _geom_bond_atom_site_label_1
  _geom_bond_atom_site_label_2
  _geom_bond_distance
  _geom_bond_site_symmetry_2
  _geom_bond_publ_flag
 S1 O1 1.423(2) . ?
 S1 O2 1.426(2) . ?
 S1 N1 1.632(2) . ?
 S1 C33 1.758(3) . ?
 N1 C1 1.473(3) . ?
 N1 C4 1.443(3) . ?
 N2 C6 1.466(3) . ?
 N2 C7 1.471(3) . ?
 N2 C14 1.465(3) . ?
 C1 H1A 0.9700 . ?
 C1 H1B 0.9700 . ?
 C1 C2 1.545(3) . ?
 C2 C3 1.512(4) . ?
 C2 C21 1.540(3) . ?
 C2 C27 1.522(3) . ?
 C3 H3 0.9300 . ?
 C3 C4 1.328(3) . ?
 C4 C5 1.485(4) . ?
 C5 H5A 0.9700 . ?
 C5 H5B 0.9700 . ?
 C5 C6 1.512(4) . ?
 C6 H6A 0.9700 . ?
 C6 H6B 0.9700 . ?
 C7 H7A 0.9700 . ?
 C7 H7B 0.9700 . ?
 C7 C8 1.510(4) . ?
 C8 C9 1.364(4) . ?
 C8 C13 1.372(5) . ?
 C9 H9 0.9300 . ?
 C9 C10 1.376(4) . ?
 C10 H10 0.9300 . ?
 C10 C11 1.364(5) . ?
 C11 H11 0.9300 . ?
 C11 C12 1.345(6) . ?
 C12 H12 0.9300 . ?
 C12 C13 1.383(6) . ?
 C13 H13 0.9300 . ?
 C14 H14A 0.9700 . ?
 C14 H14B 0.9700 . ?
 C14 C15 1.502(4) . ?
 C15 C16 1.385(4) . ?
 C15 C20 1.372(4) . ?
 C16 H16 0.9300 . ?
 C16 C17 1.387(5) . ?
 C17 H17 0.9300 . ?
 C17 C18 1.357(5) . ?
 C18 H18 0.9300 . ?
 C18 C19 1.377(5) . ?
 C19 H19 0.9300 . ?
 C19 C20 1.377(4) . ?
 C20 H20 0.9300 . ?
 C21 C22 1.381(4) . ?
 C21 C26 1.374(4) . ?
 C22 H22 0.9300 . ?
 C22 C23 1.391(4) . ?
 C23 H23 0.9300 . ?
 C23 C24 1.360(5) . ?
 C24 H24 0.9300 . ?
 C24 C25 1.362(5) . ?
 C25 H25 0.9300 . ?
 C25 C26 1.390(4) . ?
 C26 H26 0.9300 . ?
 C27 C28 1.374(4) . ?
 C27 C32 1.383(4) . ?
 C28 H28 0.9300 . ?
 C28 C29 1.385(4) . ?
 C29 H29 0.9300 . ?
 C29 C30 1.359(5) . ?
 C30 H30 0.9300 . ?
 C30 C31 1.363(5) . ?
 C31 H31 0.9300 . ?
 C31 C32 1.382(4) . ?
 C32 H32 0.9300 . ?
 C33 C34 1.377(4) . ?
 C33 C38 1.374(4) . ?
 C34 H34 0.9300 . ?
 C34 C35 1.381(4) . ?
 C35 H35 0.9300 . ?
 C35 C36 1.370(4) . ?
 C36 C37 1.366(5) . ?
 C36 C39 1.512(4) . ?
 C37 H37 0.9300 . ?
 C37 C38 1.382(4) . ?
 C38 H38 0.9300 . ?
 C39 H39A 0.9600 . ?
 C39 H39B 0.9600 . ?
 C39 H39C 0.9600 . ?

loop_
  _geom_angle_atom_site_label_1
  _geom_angle_atom_site_label_2
  _geom_angle_atom_site_label_3
  _geom_angle
  _geom_angle_site_symmetry_1
  _geom_angle_site_symmetry_3
  _geom_angle_publ_flag
 O1 S1 O2 119.99(13) . . ?
 O1 S1 N1 107.19(12) . . ?
 O1 S1 C33 107.95(13) . . ?
 O2 S1 N1 104.98(12) . . ?
 O2 S1 C33 107.20(13) . . ?
 N1 S1 C33 109.21(12) . . ?
 C1 N1 S1 118.19(17) . . ?
 C4 N1 S1 128.55(19) . . ?
 C4 N1 C1 107.62(19) . . ?
 C6 N2 C7 111.8(2) . . ?
 C6 N2 C14 110.5(2) . . ?
 C14 N2 C7 110.2(2) . . ?
 N1 C1 H1A 110.9 . . ?
 N1 C1 H1B 110.9 . . ?
 N1 C1 C2 104.14(19) . . ?
 H1A C1 H1B 108.9 . . ?
 C2 C1 H1A 110.9 . . ?
 C2 C1 H1B 110.9 . . ?
 C3 C2 C1 100.1(2) . . ?
 C3 C2 C21 107.2(2) . . ?
 C3 C2 C27 114.8(2) . . ?
 C21 C2 C1 113.2(2) . . ?
 C27 C2 C1 110.2(2) . . ?
 C27 C2 C21 111.0(2) . . ?
 C2 C3 H3 123.5 . . ?
 C4 C3 C2 113.0(2) . . ?
 C4 C3 H3 123.5 . . ?
 N1 C4 C5 122.6(2) . . ?
 C3 C4 N1 108.7(2) . . ?
 C3 C4 C5 128.5(2) . . ?
 C4 C5 H5A 108.7 . . ?
 C4 C5 H5B 108.7 . . ?
 C4 C5 C6 114.3(2) . . ?
 H5A C5 H5B 107.6 . . ?
 C6 C5 H5A 108.7 . . ?
 C6 C5 H5B 108.7 . . ?
 N2 C6 C5 114.9(2) . . ?
 N2 C6 H6A 108.6 . . ?
 N2 C6 H6B 108.6 . . ?
 C5 C6 H6A 108.6 . . ?
 C5 C6 H6B 108.6 . . ?
 H6A C6 H6B 107.5 . . ?
 N2 C7 H7A 109.2 . . ?
 N2 C7 H7B 109.2 . . ?
 N2 C7 C8 112.1(2) . . ?
 H7A C7 H7B 107.9 . . ?
 C8 C7 H7A 109.2 . . ?
 C8 C7 H7B 109.2 . . ?
 C9 C8 C7 121.9(3) . . ?
 C9 C8 C13 117.5(3) . . ?
 C13 C8 C7 120.4(3) . . ?
 C8 C9 H9 119.2 . . ?
 C8 C9 C10 121.7(3) . . ?
 C10 C9 H9 119.2 . . ?
 C9 C10 H10 120.0 . . ?
 C11 C10 C9 120.1(4) . . ?
 C11 C10 H10 120.0 . . ?
 C10 C11 H11 120.5 . . ?
 C12 C11 C10 119.1(4) . . ?
 C12 C11 H11 120.5 . . ?
 C11 C12 H12 119.5 . . ?
 C11 C12 C13 121.0(4) . . ?
 C13 C12 H12 119.5 . . ?
 C8 C13 C12 120.6(4) . . ?
 C8 C13 H13 119.7 . . ?
 C12 C13 H13 119.7 . . ?
 N2 C14 H14A 109.0 . . ?
 N2 C14 H14B 109.0 . . ?
 N2 C14 C15 112.8(2) . . ?
 H14A C14 H14B 107.8 . . ?
 C15 C14 H14A 109.0 . . ?
 C15 C14 H14B 109.0 . . ?
 C16 C15 C14 121.0(3) . . ?
 C20 C15 C14 120.6(2) . . ?
 C20 C15 C16 118.4(3) . . ?
 C15 C16 H16 120.2 . . ?
 C15 C16 C17 119.7(3) . . ?
 C17 C16 H16 120.2 . . ?
 C16 C17 H17 119.3 . . ?
 C18 C17 C16 121.5(3) . . ?
 C18 C17 H17 119.3 . . ?
 C17 C18 H18 120.5 . . ?
 C17 C18 C19 118.9(3) . . ?
 C19 C18 H18 120.5 . . ?
 C18 C19 H19 119.9 . . ?
 C20 C19 C18 120.1(4) . . ?
 C20 C19 H19 119.9 . . ?
 C15 C20 C19 121.4(3) . . ?
 C15 C20 H20 119.3 . . ?
 C19 C20 H20 119.3 . . ?
 C22 C21 C2 122.5(2) . . ?
 C26 C21 C2 120.1(2) . . ?
 C26 C21 C22 117.2(3) . . ?
 C21 C22 H22 119.4 . . ?
 C21 C22 C23 121.1(3) . . ?
 C23 C22 H22 119.4 . . ?
 C22 C23 H23 119.7 . . ?
 C24 C23 C22 120.6(3) . . ?
 C24 C23 H23 119.7 . . ?
 C23 C24 H24 120.4 . . ?
 C23 C24 C25 119.3(3) . . ?
 C25 C24 H24 120.4 . . ?
 C24 C25 H25 119.8 . . ?
 C24 C25 C26 120.3(3) . . ?
 C26 C25 H25 119.8 . . ?
 C21 C26 C25 121.5(3) . . ?
 C21 C26 H26 119.3 . . ?
 C25 C26 H26 119.3 . . ?
 C28 C27 C2 123.0(2) . . ?
 C28 C27 C32 117.3(3) . . ?
 C32 C27 C2 119.7(2) . . ?
 C27 C28 H28 119.5 . . ?
 C27 C28 C29 121.0(3) . . ?
 C29 C28 H28 119.5 . . ?
 C28 C29 H29 119.8 . . ?
 C30 C29 C28 120.5(3) . . ?
 C30 C29 H29 119.8 . . ?
 C29 C30 H30 120.1 . . ?
 C29 C30 C31 119.8(3) . . ?
 C31 C30 H30 120.1 . . ?
 C30 C31 H31 120.1 . . ?
 C30 C31 C32 119.7(3) . . ?
 C32 C31 H31 120.1 . . ?
 C27 C32 H32 119.2 . . ?
 C31 C32 C27 121.7(3) . . ?
 C31 C32 H32 119.2 . . ?
 C34 C33 S1 120.1(2) . . ?
 C38 C33 S1 120.3(2) . . ?
 C38 C33 C34 119.6(3) . . ?
 C33 C34 H34 120.3 . . ?
 C33 C34 C35 119.4(3) . . ?
 C35 C34 H34 120.3 . . ?
 C34 C35 H35 119.0 . . ?
 C36 C35 C34 122.1(3) . . ?
 C36 C35 H35 119.0 . . ?
 C35 C36 C39 121.6(3) . . ?
 C37 C36 C35 117.3(3) . . ?
 C37 C36 C39 121.0(3) . . ?
 C36 C37 H37 118.9 . . ?
 C36 C37 C38 122.2(3) . . ?
 C38 C37 H37 118.9 . . ?
 C33 C38 C37 119.4(3) . . ?
 C33 C38 H38 120.3 . . ?
 C37 C38 H38 120.3 . . ?
 C36 C39 H39A 109.5 . . ?
 C36 C39 H39B 109.5 . . ?
 C36 C39 H39C 109.5 . . ?
 H39A C39 H39B 109.5 . . ?
 H39A C39 H39C 109.5 . . ?
 H39B C39 H39C 109.5 . . ?

loop_
  _geom_torsion_atom_site_label_1
  _geom_torsion_atom_site_label_2
  _geom_torsion_atom_site_label_3
  _geom_torsion_atom_site_label_4
  _geom_torsion
  _geom_torsion_site_symmetry_1
  _geom_torsion_site_symmetry_2
  _geom_torsion_site_symmetry_3
  _geom_torsion_site_symmetry_4
  _geom_torsion_publ_flag
 S1 N1 C1 C2 -179.80(16) . . . . ?
 S1 N1 C4 C3 -166.89(18) . . . . ?
 S1 N1 C4 C5 18.1(3) . . . . ?
 S1 C33 C34 C35 176.3(3) . . . . ?
 S1 C33 C38 C37 -177.0(3) . . . . ?
 O1 S1 N1 C1 175.44(18) . . . . ?
 O1 S1 N1 C4 -34.5(2) . . . . ?
 O1 S1 C33 C34 -142.2(3) . . . . ?
 O1 S1 C33 C38 35.0(3) . . . . ?
 O2 S1 N1 C1 46.8(2) . . . . ?
 O2 S1 N1 C4 -163.2(2) . . . . ?
 O2 S1 C33 C34 -11.6(3) . . . . ?
 O2 S1 C33 C38 165.5(2) . . . . ?
 N1 S1 C33 C34 101.6(3) . . . . ?
 N1 S1 C33 C38 -81.2(3) . . . . ?
 N1 C1 C2 C3 -23.9(2) . . . . ?
 N1 C1 C2 C21 89.9(2) . . . . ?
 N1 C1 C2 C27 -145.1(2) . . . . ?
 N1 C4 C5 C6 179.1(2) . . . . ?
 N2 C7 C8 C9 -42.3(4) . . . . ?
 N2 C7 C8 C13 141.1(4) . . . . ?
 N2 C14 C15 C16 109.8(3) . . . . ?
 N2 C14 C15 C20 -70.7(3) . . . . ?
 C1 N1 C4 C3 -14.4(3) . . . . ?
 C1 N1 C4 C5 170.6(2) . . . . ?
 C1 C2 C3 C4 16.9(3) . . . . ?
 C1 C2 C21 C22 -20.6(4) . . . . ?
 C1 C2 C21 C26 164.2(3) . . . . ?
 C1 C2 C27 C28 114.4(3) . . . . ?
 C1 C2 C27 C32 -65.3(3) . . . . ?
 C2 C3 C4 N1 -2.4(3) . . . . ?
 C2 C3 C4 C5 172.2(2) . . . . ?
 C2 C21 C22 C23 -175.8(3) . . . . ?
 C2 C21 C26 C25 176.3(3) . . . . ?
 C2 C27 C28 C29 -179.8(3) . . . . ?
 C2 C27 C32 C31 179.0(3) . . . . ?
 C3 C2 C21 C22 88.7(3) . . . . ?
 C3 C2 C21 C26 -86.5(3) . . . . ?
 C3 C2 C27 C28 2.4(4) . . . . ?
 C3 C2 C27 C32 -177.3(3) . . . . ?
 C3 C4 C5 C6 5.2(4) . . . . ?
 C4 N1 C1 C2 24.4(2) . . . . ?
 C4 C5 C6 N2 -66.4(3) . . . . ?
 C6 N2 C7 C8 164.4(2) . . . . ?
 C6 N2 C14 C15 -75.8(3) . . . . ?
 C7 N2 C6 C5 -71.5(3) . . . . ?
 C7 N2 C14 C15 160.1(2) . . . . ?
 C7 C8 C9 C10 -177.2(3) . . . . ?
 C7 C8 C13 C12 178.1(5) . . . . ?
 C8 C9 C10 C11 -0.4(5) . . . . ?
 C9 C8 C13 C12 1.4(7) . . . . ?
 C9 C10 C11 C12 0.4(7) . . . . ?
 C10 C11 C12 C13 0.4(9) . . . . ?
 C11 C12 C13 C8 -1.4(9) . . . . ?
 C13 C8 C9 C10 -0.5(5) . . . . ?
 C14 N2 C6 C5 165.3(2) . . . . ?
 C14 N2 C7 C8 -72.3(3) . . . . ?
 C14 C15 C16 C17 -179.3(3) . . . . ?
 C14 C15 C20 C19 -179.5(3) . . . . ?
 C15 C16 C17 C18 -2.0(6) . . . . ?
 C16 C15 C20 C19 0.0(5) . . . . ?
 C16 C17 C18 C19 1.5(6) . . . . ?
 C17 C18 C19 C20 -0.2(5) . . . . ?
 C18 C19 C20 C15 -0.5(5) . . . . ?
 C20 C15 C16 C17 1.2(5) . . . . ?
 C21 C2 C3 C4 -101.4(2) . . . . ?
 C21 C2 C27 C28 -119.4(3) . . . . ?
 C21 C2 C27 C32 60.9(3) . . . . ?
 C21 C22 C23 C24 -0.4(5) . . . . ?
 C22 C21 C26 C25 0.9(5) . . . . ?
 C22 C23 C24 C25 0.9(6) . . . . ?
 C23 C24 C25 C26 -0.4(6) . . . . ?
 C24 C25 C26 C21 -0.4(6) . . . . ?
 C26 C21 C22 C23 -0.5(5) . . . . ?
 C27 C2 C3 C4 134.8(2) . . . . ?
 C27 C2 C21 C22 -145.2(3) . . . . ?
 C27 C2 C21 C26 39.6(4) . . . . ?
 C27 C28 C29 C30 1.4(5) . . . . ?
 C28 C27 C32 C31 -0.7(5) . . . . ?
 C28 C29 C30 C31 -1.9(6) . . . . ?
 C29 C30 C31 C32 1.1(6) . . . . ?
 C30 C31 C32 C27 0.2(6) . . . . ?
 C32 C27 C28 C29 -0.1(5) . . . . ?
 C33 S1 N1 C1 -67.9(2) . . . . ?
 C33 S1 N1 C4 82.2(2) . . . . ?
 C33 C34 C35 C36 0.8(5) . . . . ?
 C34 C33 C38 C37 0.2(5) . . . . ?
 C34 C35 C36 C37 -0.1(6) . . . . ?
 C34 C35 C36 C39 -178.6(3) . . . . ?
 C35 C36 C37 C38 -0.7(6) . . . . ?
 C36 C37 C38 C33 0.6(6) . . . . ?
 C38 C33 C34 C35 -0.8(5) . . . . ?
 C39 C36 C37 C38 177.9(3) . . . . ?

loop_
  _refln_index_h
  _refln_index_k
  _refln_index_l
  _refln_F_squared_meas
  _refln_F_squared_sigma
  _refln_scale_group_code
 0 0 -3 -8.41572 13.8205 2
 0 0 -3 17.9279 17.8151 3
 0 0 -3 -1.98545 10.0975 1
 0 0 -3 -6.66229 8.48581 5
 0 0 4 123965 1311.16 1
 0 0 -4 120730 1559.45 2
 0 0 -4 120672 888.814 5
 0 0 -4 117015 1446.49 3
 0 0 -5 27.8014 17.631 5
 0 0 -5 30.9308 34.2285 3
 0 0 5 15.9292 15.9849 1
 0 0 -5 -30.2443 46.3954 2
 0 0 6 17116.1 594.378 1
 0 0 -6 17417.6 400.53 5
 0 0 -6 16105.5 669.51 3
 0 0 -6 16511.1 720.042 2
 0 0 -7 304.394 122.11 3
 0 0 7 314.862 98.7521 1
 0 0 -7 254.349 115.557 2
 0 0 -8 2691.3 342.881 2
 0 0 -8 2931.35 191.22 5
 0 0 8 2843.36 280.033 1
 0 0 -8 3093.09 345.611 3
 0 0 -9 -27.8793 67.7215 2
 0 0 -9 53.313 60.8928 3
 0 0 -9 39.7092 28.8449 5
 0 0 9 25.5793 25.6912 1
 0 0 -10 1659.96 289.104 3
 0 0 -10 1653.39 306.286 2
 0 0 10 1569.55 233.995 1
 0 0 11 127.049 92.6604 1
 0 0 -11 221.393 139.007 2
 0 0 -11 278.715 153.641 3
 0 0 -12 2258.67 382.215 3
 0 0 -12 2403.92 410.323 2
 0 0 -13 447.053 182.674 3
 0 0 -13 707.299 231.205 2
 0 0 -14 830.67 276.638 2
 0 0 -14 905.683 271.748 3
 0 0 -15 474.649 197.888 2
 0 0 -16 1095.46 331.488 2
 0 0 -17 269.745 193.591 2
 0 0 -18 142.987 136.833 2
 0 -1 -3 30138 706.387 3
 0 -1 -3 29318.7 619.391 2
 0 -1 -3 30546.2 615.988 1
 0 1 -3 32096.9 733.736 2
 0 1 -3 31173.8 549.905 3
 0 1 -4 4997.38 268.915 3
 0 1 4 5274.6 293.988 2
 0 1 -4 4763.8 166.749 5
 0 -1 -4 4984.58 283.714 1
 0 -1 4 5093.56 159.06 5
 0 1 -4 5221.52 337.739 2
 0 -1 -4 5284.21 334.544 3
 0 -1 -4 4913.7 301.756 2
 0 1 4 5186.29 278.081 1
 0 -1 4 5278.69 260.403 1
 0 -1 5 25926.6 418.663 5
 0 1 5 25214.1 680.37 1
 0 -1 5 25158.2 656.865 1
 0 1 -5 24852.7 696.393 3
 0 -1 -5 23404.4 750.2 2
 0 1 -5 25557.5 426.728 5
 0 -1 -5 26489.1 542.339 5
 0 -1 -5 23859.9 793.282 3
 0 1 -5 26389.4 856.933 2
 0 1 -6 15850 371.625 5
 0 -1 -6 15849.6 706.458 3
 0 1 -6 15442.4 618.248 3
 0 -1 -6 16910.2 448.302 5
 0 -1 -6 15760.5 677.051 2
 0 -1 6 15308.2 555.042 1
 0 1 -6 16345.8 741.791 2
 0 1 6 17215.6 603.596 1
 0 -1 7 3775.91 297.171 1
 0 1 -7 3871.75 393.404 2
 0 -1 -7 3858.31 364.663 2
 0 -1 -7 4129 389.814 3
 0 1 7 4085.89 319.931 1
 0 1 -7 4296.64 207.893 5
 0 -1 -7 4212.7 235.134 5
 0 1 -7 3770.04 337.217 3
 0 -1 -8 18.7014 37.2685 3
 0 1 -8 2.25904 40.4565 3
 0 1 -8 28.4699 18.9437 5
 0 -1 -8 -25.9183 39.2528 2
 0 1 8 93.6586 50.865 1
 0 -1 8 13.1285 29.6458 1
 0 1 -8 13.8605 37.4745 2
 0 -1 9 -51.1965 54.9413 1
 0 1 9 -23.8846 25.852 1
 0 -1 -9 -2.22139 35.8433 3
 0 1 -9 -12.3931 18.5618 5
 0 -1 -9 -22.3337 44.8769 2
 0 1 -9 15.642 25.4177 3
 0 1 -9 73.2995 51.0519 2
 0 -1 10 -43.1669 52.546 1
 0 1 -10 20.7589 31.7274 3
 0 -1 -10 -71.793 68.8151 3
 0 -1 -10 -34.3151 61.5817 2
 0 1 -10 -26.8275 70.29 2
 0 1 -11 6669.81 658.747 2
 0 -1 -11 7416.65 666.389 2
 0 -1 -11 8012.46 691.527 3
 0 -1 11 6465.57 487.714 1
 0 1 -11 6777.65 598.236 3
 0 -1 -12 2663.11 426.521 3
 0 -1 12 3234.53 355.204 1
 0 1 -12 3114.79 426.802 3
 0 -1 -12 2998.74 450.188 2
 0 1 -12 3424.39 488.244 2
 0 -1 13 -44.5459 45.1423 1
 0 -1 -13 -46.2611 57.4289 2
 0 1 -13 -29.529 64.5442 3
 0 -1 -13 96.0834 126.603 3
 0 1 -13 159.704 126.913 2
 0 -1 -14 19.5761 43.7099 3
 0 1 -14 25.2332 83.0266 3
 0 1 -14 111.065 113.797 2
 0 -1 -14 15.8366 61.1789 2
 0 1 -15 1206.33 345.055 2
 0 -1 -15 769.465 261.749 2
 0 -1 -15 1105.29 307.442 3
 0 -1 -16 75.0401 101.861 2
 0 1 -16 -56.0356 44.6175 2
 0 1 -17 58.7461 120.97 2
 0 -1 -17 29.8541 97.3604 2
 0 1 -18 154.517 133.235 2
 0 -1 -18 78.3748 120.996 2
 0 -2 -2 617.212 59.8357 2
 0 -2 2 689.144 73.1629 5
 0 2 -2 768.823 103.813 2
 0 -2 -2 652.658 101.294 3
 0 -2 -3 272.682 76.4654 3
 0 2 -3 186.484 62.1673 2
 0 -2 -3 125.834 41.868 1
 0 -2 3 143.918 28.4765 5
 0 -2 -3 160.669 41.3115 2
 0 2 -3 167.309 33.4215 3
 0 2 -3 171.882 37.23 5
 0 2 3 165.285 39.6865 2
 0 -2 -4 3701.74 303.559 3
 0 -2 4 4265.29 153.732 5
 0 2 -4 3832.78 301.832 2
 0 2 -4 3770.66 205.718 3
 0 2 -4 3898.47 180.901 5
 0 2 4 3710.39 229.689 2
 0 -2 -4 3876.38 250.47 2
 0 -2 -5 2792.23 289.845 3
 0 2 -5 2897.66 215.338 3
 0 2 -5 2896.61 158.926 5
 0 2 -5 2931.76 296.429 2
 0 -2 -5 2878.49 251.12 2
 0 -2 5 2866.69 127.596 5
 0 -2 6 21777.5 649.661 1
 0 2 -6 20958.1 452.038 5
 0 -2 -6 21415.6 866.869 3
 0 -2 -6 20544.5 750.226 2
 0 -2 6 22237.3 387.632 5
 0 2 -6 21010.2 662.048 3
 0 2 -6 22354.2 884.286 2
 0 -2 7 7317.33 416.854 1
 0 2 -7 7307.56 436.677 3
 0 2 -7 7015.06 543.198 2
 0 2 -7 7304.6 281.543 5
 0 -2 -7 6829.11 469.425 2
 0 -2 -7 7859.91 562.267 3
 0 -2 -8 23604.6 960.099 2
 0 -2 8 24936.4 815.334 1
 0 2 -8 25036.7 893.244 3
 0 2 -8 24129.5 1073.34 2
 0 -2 -8 25441.2 1088.13 3
 0 2 -8 24380.9 540.992 5
 0 -2 9 3929.01 341.368 1
 0 -2 -9 4132.13 471.423 3
 0 -2 -9 4071.48 426.926 2
 0 2 -9 4043.21 386.614 3
 0 2 -9 3993.02 468.203 2
 0 2 -9 3964.76 226.842 5
 0 -2 10 1305 204.711 1
 0 -2 -10 1491.73 273.342 2
 0 2 -10 1423.8 293.301 2
 0 -2 -10 1260.61 261.377 3
 0 2 -10 1579.18 257.96 3
 0 2 -11 634.754 207.286 2
 0 -2 -11 386.75 169.405 3
 0 2 -11 623.468 173.808 3
 0 -2 -11 747.281 209.158 2
 0 -2 11 409.31 120.618 1
 0 2 -12 180.648 121.291 2
 0 -2 -12 -2.0005 47.9073 2
 0 -2 12 528.387 145.306 1
 0 2 -12 335.525 154.304 3
 0 -2 -12 511.497 198.497 3
 0 2 -13 2067.24 352.794 3
 0 -2 -13 1769.94 362.869 3
 0 -2 -13 1987.15 375.14 2
 0 2 -13 2041.74 406.787 2
 0 -2 13 2149.75 301.114 1
 0 -2 -14 342.38 154.987 2
 0 2 -14 219.87 176.903 2
 0 -2 -14 115.229 105.015 3
 0 -2 -15 117.078 89.8972 2
 0 2 -15 551.647 241.839 2
 0 -2 -15 466.391 222.96 3
 0 -2 -16 485.223 220.471 2
 0 2 -16 258.114 152.318 2
 0 -2 -16 222.948 142.596 3
 0 -2 -17 217.459 175.139 2
 0 2 -17 927.888 332.887 2
 0 -2 -18 121.422 122.163 2
 0 -3 0 -10.3603 10.0597 3
 0 3 0 -8.31791 12.0648 2
 0 3 -1 856.753 95.9181 2
 0 -3 -1 889.293 114.136 3
 0 -3 -2 35327 820.639 3
 0 3 -2 35211.7 749.078 2
 0 -3 2 35506.1 679.166 5
 0 -3 3 39671.3 676.328 5
 0 -3 -3 37907.5 587.387 2
 0 3 -3 38031.2 898.519 2
 0 3 -3 38355.2 691.643 5
 0 -3 -3 38981.3 962.713 3
 0 -3 4 1215.44 109.564 5
 0 3 -4 1392.13 192.85 2
 0 3 -4 1354.58 125.946 5
 0 -3 -4 1526.84 210.863 3
 0 -3 -4 1337.85 137.69 2
 0 3 -4 1336.18 101.8 3
 0 3 -5 36537.2 1085.24 2
 0 -3 5 36514.8 540.484 5
 0 3 -5 35745.7 668.427 3
 0 -3 -5 35401.2 1091.48 3
 0 -3 -5 34065.5 825.883 2
 0 3 -5 36679.8 657.17 5
 0 -3 -6 76406.4 1728.4 3
 0 -3 -6 73443.7 1349.41 2
 0 -3 6 73486.5 743.79 5
 0 3 -6 73600.8 962.053 5
 0 3 -6 72252 1144.28 3
 0 3 -6 76971.4 1710.84 2
 0 3 -7 671.16 92.2143 5
 0 -3 -7 606.37 177.739 3
 0 -3 -7 563.777 133.78 2
 0 3 -7 490.133 154.772 2
 0 -3 7 558.285 64.0949 5
 0 3 -7 595.195 112.342 3
 0 -3 8 10304.4 523.29 1
 0 3 -8 10338.2 368.181 5
 0 -3 -8 10380.1 614.771 2
 0 -3 8 10373.6 295.332 5
 0 -3 -8 12334 782.855 3
 0 3 -8 11297.5 552.508 3
 0 3 -8 11634.4 764.091 2
 0 -3 -9 753.79 228.15 3
 0 3 -9 771.876 217.716 2
 0 3 -9 795.54 162.472 3
 0 -3 -9 844.408 193.696 2
 0 3 -9 663.693 94.34 5
 0 -3 9 788.302 153.08 1
 0 3 -10 15073.6 757.989 3
 0 3 -10 14130.7 939.799 2
 0 -3 -10 15110.1 974.151 3
 0 -3 10 15955.5 723.406 1
 0 -3 -10 14549.1 850.843 2
 0 -3 11 3673.81 365.343 1
 0 -3 -11 2293.46 393.411 3
 0 3 -11 3276.68 378.417 3
 0 -3 -11 3191.1 423.838 2
 0 3 -11 3286.9 475.767 2
 0 -3 -12 111.169 73.9687 2
 0 -3 -12 16.0072 76.4412 3
 0 3 -12 100.609 97.8467 2
 0 3 -12 96.9881 73.2785 3
 0 -3 12 107.638 68.3894 1
 0 -3 -13 83.3234 52.5172 3
 0 -3 13 102.257 68.5678 1
 0 -3 -13 122.664 61.0603 2
 0 3 -13 261.217 155.792 2
 0 3 -14 1076.37 325.045 2
 0 -3 -14 1342.62 350.873 3
 0 -3 -14 1285.86 317.252 2
 0 -3 -15 149.625 138.187 2
 0 -3 -15 145.053 126.997 3
 0 3 -15 160.1 152.431 2
 0 -3 -16 162.406 152.827 2
 0 3 -16 -82.2886 126.244 2
 0 -3 -16 28.2877 77.0028 3
 0 3 -17 797.708 303.849 2
 0 -3 -17 466.622 219.557 2
 0 -4 0 50073.7 829.357 3
 0 4 0 49023.6 633.891 2
 0 4 -1 914.721 111.719 2
 0 -4 -1 898.644 127.548 3
 0 -4 1 888.871 104.425 2
 0 -4 1 874.453 91.5301 3
 0 -4 -2 6640.58 389.268 3
 0 -4 2 6393.87 343.364 5
 0 4 -2 6385.86 342.635 2
 0 -4 3 1047.41 132.138 5
 0 4 -3 1026.3 155.63 2
 0 -4 -3 1091.94 85.3998 2
 0 -4 -3 748.387 143.685 3
 0 -4 -4 37423.6 1106.33 3
 0 -4 -4 35365.7 659.264 2
 0 4 -4 36187.6 776.313 5
 0 4 -4 37994.5 1050.05 2
 0 -4 4 35830.4 744.269 5
 0 -4 -5 4185.53 269.562 2
 0 4 -5 4049.92 252.709 5
 0 4 -5 4718.33 402.4 2
 0 -4 -5 4253.17 401.513 3
 0 4 -5 4406.13 194.332 3
 0 -4 5 4272.32 233.794 5
 0 -4 6 5447.87 237.825 5
 0 4 -6 5396.67 284.84 5
 0 -4 -6 5556.34 358.635 2
 0 4 -6 5597.11 273.567 3
 0 4 -6 5507.01 475.409 2
 0 -4 -6 4849.09 459.794 3
 0 4 -7 495.449 93.5587 3
 0 -4 -7 580.64 131.762 2
 0 -4 -7 472.199 159.325 3
 0 4 -7 485.237 85.3503 5
 0 -4 7 491.997 66.929 5
 0 4 -7 350.405 112.217 2
 0 -4 -8 2424.33 292.867 2
 0 4 -8 1926.27 166.035 5
 0 -4 -8 2451.61 373.386 3
 0 4 -8 2429.02 362.412 2
 0 4 -8 2073.92 220.644 3
 0 -4 8 2250.07 137.072 5
 0 -4 9 674.575 75.9466 5
 0 4 -9 619.672 180.116 2
 0 -4 -9 724.604 167.102 2
 0 -4 -9 521.607 172.457 3
 0 4 -9 569.597 88.4933 5
 0 -4 9 527.325 128.158 1
 0 4 -9 572.625 127.465 3
 0 4 -10 1504.76 316.32 2
 0 4 -10 1446.83 219.851 3
 0 -4 10 1678.85 238.963 1
 0 -4 -10 1503.2 263.013 2
 0 -4 -10 1814.51 346.712 3
 0 -4 11 -43.2932 64.1223 1
 0 4 -11 85.5879 97.5891 2
 0 -4 -11 105.798 97.4741 3
 0 -4 -11 117.159 83.927 2
 0 -4 -12 2758.38 414.919 2
 0 4 -12 2393.54 445.363 2
 0 -4 -12 2018.3 407.239 3
 0 -4 12 2677.03 321.286 1
 0 -4 -13 -29.9193 95.636 2
 0 -4 -13 141.998 80.1131 3
 0 4 -14 -36.9886 79.7747 2
 0 -4 -14 -10.391 70.8428 2
 0 -4 -14 -6.15675 96.7033 3
 0 -4 -15 -90.1698 118.374 2
 0 -4 -15 -8.57386 63.6158 3
 0 -4 -16 688.624 273.986 3
 0 4 -16 879.472 319.018 2
 0 4 -17 -73.9561 81.6189 2
 0 5 0 13.5685 22.4342 2
 0 -5 0 5.57372 20.6844 3
 0 5 -1 3012.58 216.334 2
 0 -5 1 2920.32 195.751 3
 0 -5 1 3126.2 203.723 2
 0 -5 -1 2957.19 255.597 3
 0 -5 2 110047 1617.94 5
 0 5 -2 107374 1491.14 2
 0 -5 -2 109676 1711.83 3
 0 -5 -3 5944.33 441.522 3
 0 5 -3 5627.49 383.165 2
 0 -5 3 5841.01 361.46 5
 0 5 -4 11087.8 590.345 2
 0 -5 4 11183.5 479.185 5
 0 -5 -4 11362.3 637.335 3
 0 -5 -4 11185.1 328.895 2
 0 -5 5 71.4502 37.8478 5
 0 -5 -5 21.6047 35.2649 3
 0 5 -5 36.1837 71.9652 2
 0 -5 -5 58.2266 34.6808 2
 0 -5 -6 3540.89 270.848 2
 0 -5 6 3124.66 217.39 5
 0 5 -6 3033.85 362.206 2
 0 -5 -6 3017.12 380.644 3
 0 -5 7 2215.25 167.689 5
 0 -5 -7 1953.23 229.289 2
 0 5 -7 2700.17 364.091 2
 0 -5 -7 1854.99 326.836 3
 0 -5 -8 11.824 68.1096 3
 0 5 -8 -75.7876 102.327 2
 0 -5 -8 7.8321 22.9983 2
 0 -5 8 43.5417 23.2194 5
 0 5 -9 3457.48 464.488 2
 0 -5 -9 3903.22 505.391 3
 0 -5 9 3539.15 178.427 5
 0 -5 -9 3465.86 364.5 2
 0 5 -10 476.467 184.325 2
 0 -5 -10 800.071 192.015 2
 0 -5 10 907.183 173.759 1
 0 -5 -10 517.326 195.784 3
 0 -5 -11 2555.3 458.131 3
 0 -5 11 2016.55 267.702 1
 0 5 -11 2080.95 387.365 2
 0 -5 -11 2185.04 336.815 2
 0 -5 12 42.2191 26.1425 1
 0 5 -12 154.359 160.74 2
 0 -5 -12 116.068 101.042 2
 0 -5 -12 64.8196 97.2797 3
 0 5 -13 1476.43 371.225 2
 0 -5 -13 1107.83 318.852 3
 0 -5 -13 1061.09 267.028 2
 0 -5 -14 697.67 226.549 2
 0 5 -14 619.747 219.987 2
 0 -5 -14 1093.77 336.034 3
 0 -5 -15 408.758 203.12 3
 0 5 -15 714.683 272.068 2
 0 5 -16 317.136 212.103 2
 0 -5 -16 685.412 290.472 3
 0 -6 0 4022.3 297.219 3
 0 6 0 4110.25 226.278 2
 0 6 1 2838.76 140.096 2
 0 -6 -1 3036.15 282.054 3
 0 -6 1 2760.91 217.022 3
 0 6 -1 2793.03 224.274 2
 0 -6 2 9154.49 518.484 5
 0 6 -2 9667.93 470.98 2
 0 -6 -2 9666.02 547.543 3
 0 6 -3 37138.6 1025.84 2
 0 -6 -3 38302.9 1165.61 3
 0 -6 3 37161.1 1016.39 5
 0 -6 -4 2051.85 290.707 3
 0 -6 4 2450.68 250.667 5
 0 6 -4 2251.84 271.501 2
 0 6 -5 24199.2 980.12 2
 0 -6 -5 24921.8 1071.56 3
 0 -6 5 23190.6 742.9 5
 0 -6 -5 22437.6 521.941 2
 0 -6 6 414.458 91.9877 5
 0 -6 -6 400.259 153.501 3
 0 -6 -6 336.988 75.4052 2
 0 6 -6 436.488 142.432 2
 0 -6 7 7.3007 22.704 5
 0 -6 -7 -7.96163 21.2935 2
 0 6 -7 25.2597 68.6853 2
 0 -6 -7 97.3506 86.0444 3
 0 -6 8 64.0763 33.9209 5
 0 -6 -8 61.9144 42.5073 2
 0 6 -8 65.6092 27.742 4
 0 6 -8 -63.4719 110.706 2
 0 -6 -8 125.596 105.846 3
 0 6 -9 2001.33 348.998 2
 0 -6 -9 1702.16 248.2 2
 0 -6 -9 1551.85 330.935 3
 0 -6 9 1831.66 143.898 5
 0 -6 -10 -88.911 65.1071 2
 0 -6 -10 25.869 67.7906 3
 0 -6 -11 368.786 178.028 3
 0 6 -11 522.426 189.031 2
 0 -6 -11 207.701 100.82 2
 0 -6 11 477.422 130.355 1
 0 -6 -12 -82.5068 133.894 3
 0 6 -12 -49.9249 114.493 2
 0 -6 12 -60.9746 76.5075 1
 0 -6 -12 32.7762 38.9624 2
 0 -6 -13 1694.31 323.316 2
 0 -6 -13 1148.69 341.944 3
 0 6 -13 1868.45 409.368 2
 0 -6 -14 774.217 277.837 3
 0 6 -14 180.511 114.155 2
 0 -6 -15 468.405 228.7 3
 0 6 -15 829.411 278.393 2
 0 6 -16 97.9626 118.61 2
 0 -6 -16 -423.796 231.669 3
 0 7 0 164.288 55.6526 2
 0 -7 0 181.477 77.8808 3
 0 7 -1 30988.7 793.422 2
 0 -7 1 32531 816.439 3
 0 -7 -1 32095 992.127 3
 0 7 1 31049.4 526.744 2
 0 -7 2 6641.06 485.309 5
 0 -7 -2 6341.54 475.162 3
 0 7 -2 6650.68 411.89 2
 0 7 -3 9881.52 546.87 2
 0 -7 3 10050 577.609 5
 0 -7 3 10036.9 293.301 4
 0 -7 -3 10646.7 647.866 3
 0 -7 -4 58.8999 43.1963 3
 0 7 -4 13.4073 55.892 2
 0 -7 4 51.894 43.7249 5
 0 -7 5 10338.6 549.233 5
 0 -7 -5 9892.62 712.326 3
 0 7 -5 11306.7 689.043 2
 0 -7 -6 4352.61 497.44 3
 0 7 -6 4199.29 448.665 2
 0 -7 6 4087.8 334.029 5
 0 -7 -6 4164.25 243.526 2
 0 -7 -7 312.897 144.22 3
 0 -7 -7 229.524 72.1236 2
 0 7 -7 459.457 157.402 2
 0 -7 7 390.975 95.3675 5
 0 -7 -8 196.229 121.922 3
 0 -7 8 350.664 80.0374 5
 0 7 -8 258.4 124.812 2
 0 -7 -8 354.901 97.4022 2
 0 -7 -9 294.679 156.402 3
 0 -7 9 297.931 67.9158 5
 0 7 -9 256.625 173.537 2
 0 -7 -9 208.216 85.4956 2
 0 7 -10 8402.18 797.085 2
 0 -7 -10 8977.57 589.113 2
 0 -7 -10 8251.34 813.122 3
 0 7 -11 10.6971 71.3687 2
 0 -7 -11 -12.1784 55.0939 2
 0 -7 -11 0.80932 45.099 3
 0 -7 -12 42.952 100.558 3
 0 7 -12 -82.5886 121.425 2
 0 7 -13 416.66 223.229 2
 0 -7 -13 64.0532 131.884 3
 0 -7 -14 296.827 182.521 3
 0 7 -14 907.212 308.212 2
 0 7 -15 24.2054 118.342 2
 0 -7 -15 123.398 80.2977 3
 0 -7 -16 479.286 283.76 3
 0 7 -16 -9.28008 109.056 2
 0 -8 0 4819.4 382.057 3
 0 8 0 4767.56 284.384 2
 0 -8 1 5290.18 365.559 3
 0 8 -1 5867.1 362.073 2
 0 8 1 5252.53 241.669 2
 0 -8 -1 4972.71 413.846 3
 0 -8 -2 1335.57 229.254 3
 0 8 -2 1491 204.104 2
 0 -8 2 1379.04 238.545 5
 0 8 -3 39108.3 1145.09 2
 0 -8 3 37629.7 687.431 4
 0 -8 3 37107.8 1209.77 5
 0 -8 -3 39469.5 1335.46 3
 0 -8 4 538.935 147.99 5
 0 8 -4 705.263 171.316 2
 0 -8 -4 505.436 163.331 3
 0 -8 -5 3252.85 427.636 3
 0 8 -5 3590.77 398.265 2
 0 -8 5 3562.42 352.976 5
 0 -8 6 175.061 71.6072 5
 0 -8 -6 209.96 137.33 3
 0 8 -6 167.956 90.4675 2
 0 -8 -7 8105.18 740.713 3
 0 8 -7 6984.55 628.877 2
 0 -8 7 7809.6 473.292 5
 0 -8 -8 4702.67 588.435 3
 0 8 -8 5093.43 567.717 2
 0 -8 8 4364.41 328.664 5
 0 8 -9 3579.82 496.825 2
 0 -8 -9 4006.65 333.952 2
 0 -8 -9 4028.34 568.48 3
 0 -8 9 3872.75 277.235 5
 0 8 -10 458.224 223.891 2
 0 -8 -10 159.13 95.699 3
 0 -8 -11 616.121 231.878 3
 0 8 -11 478.804 163.993 2
 0 -8 -12 1784.68 434.05 3
 0 8 -12 1567.4 377.13 2
 0 -8 -13 127.417 110.67 3
 0 8 -13 265.159 143.014 2
 0 -8 -14 -51.4342 102.93 3
 0 8 -14 49.6548 76.5799 2
 0 -8 -15 -128.167 134.178 3
 0 8 -15 -14.7193 96.6069 2
 0 -8 -16 162.492 179.507 3
 0 9 0 2.22452 19.3642 2
 0 -9 0 31.0454 38.4607 3
 0 -9 -1 361.655 119.288 3
 0 9 1 294.361 61.7826 2
 0 -9 1 316.403 100.276 3
 0 9 -1 448.901 102.751 2
 0 -9 -2 13709.6 772.129 3
 0 9 -2 12694.2 620.724 2
 0 -9 2 14388.8 831.255 5
 0 -9 -3 49120 1550.31 3
 0 -9 3 47902.3 1472.68 5
 0 9 -3 47956.9 1309.5 2
 0 -9 3 48014.4 872.521 4
 0 -9 -4 3056.11 409.091 3
 0 9 -4 3321.76 372.011 2
 0 -9 4 2798.9 349.678 5
 0 -9 -5 1968.49 347.04 3
 0 -9 5 1994.9 291.527 5
 0 9 -5 1717.85 293.992 2
 0 -9 -6 769.127 244.769 3
 0 -9 6 786.569 178.283 5
 0 9 -6 551.98 181.272 2
 0 9 -7 5678.38 588.272 2
 0 -9 -7 6734.05 700.993 3
 0 -9 7 6356.41 470.699 5
 0 -9 8 71.8924 57.7048 5
 0 -9 -8 155.653 117.899 3
 0 9 -8 137.169 106.074 2
 0 9 -9 1950.85 384.055 2
 0 -9 -9 1488.09 356.938 3
 0 -9 -10 2323.62 462.029 3
 0 9 -10 2531.55 445.869 2
 0 -9 -11 -18.5482 117.635 3
 0 9 -11 -240.708 150.594 2
 0 -9 -12 1930.38 467.018 3
 0 9 -12 1817.23 404.19 2
 0 -9 -13 -35.4517 109.214 3
 0 9 -13 212.813 167.717 2
 0 9 -14 582.369 259.551 2
 0 -9 -14 478.743 216.67 3
 0 9 -15 770.012 294.731 2
 0 -9 -15 735.555 307.952 3
 0 -9 -16 99.9089 117.894 3
 0 10 0 176.215 58.5505 2
 0 -10 0 214.941 98.9632 3
 0 10 1 8030.62 333.587 2
 0 -10 1 7714.99 659.052 5
 0 -10 -1 8651.7 611.408 3
 0 -10 1 7692.21 502.303 3
 0 10 -1 8129.18 473.888 2
 0 -10 2 183.982 52.4527 5
 0 -10 -2 24.4847 47.5703 3
 0 10 -2 75.6962 78.2975 2
 0 -10 3 3316.3 415.713 5
 0 10 -3 3608.84 370.726 2
 0 -10 -3 4202.41 474.195 3
 0 -10 3 3543.49 263.175 4
 0 10 -4 11577.6 717.115 2
 0 -10 -4 10710.7 803.589 3
 0 -10 4 11324.5 752.483 5
 0 -10 5 11983.6 751.553 5
 0 -10 -5 12325.8 894.011 3
 0 10 -5 11329.8 754.823 2
 0 -10 6 2739.67 347.148 5
 0 10 -6 3074.42 418.14 2
 0 -10 -6 2806.55 445.098 3
 0 10 -7 1566.59 312.161 2
 0 -10 -7 1706.65 366.064 3
 0 -10 7 1394.86 241.206 5
 0 -10 -8 7866.07 812.708 3
 0 -10 8 8487.38 551.193 5
 0 10 -8 7844.86 741.213 2
 0 10 -9 4227.59 561.658 2
 0 -10 -9 3932.07 596.181 3
 0 10 -10 337.314 175.825 2
 0 -10 -10 482.233 217.334 3
 0 -10 -11 96.6092 76.4507 3
 0 10 -11 162.708 122.95 2
 0 -10 -12 1212.68 359.502 3
 0 10 -12 1727.75 414.367 2
 0 -10 -13 50.9576 92.6854 3
 0 10 -13 165.808 146.747 2
 0 10 -14 133.889 145.19 2
 0 -10 -14 68.0927 118.925 3
 0 10 -15 204.746 154.854 2
 0 -10 -15 631.946 331.566 3
 0 11 0 94.568 47.7861 2
 0 -11 0 271.484 120.962 3
 0 -11 -1 5771.36 518.906 3
 0 -11 1 5542.42 589.699 5
 0 11 -1 5487.4 405.348 2
 0 11 1 5877.77 296.777 2
 0 11 -2 348.662 108.262 2
 0 -11 -2 173.007 92.4379 3
 0 -11 2 206.543 127.951 5
 0 -11 3 5453.02 354.426 4
 0 -11 -3 4903.86 532.994 3
 0 11 -3 4768.29 446.005 2
 0 -11 3 5389.42 554.638 5
 0 -11 -4 88.4974 77.7048 3
 0 -11 4 318.572 148.024 5
 0 11 -4 100.941 79.9674 2
 0 -11 4 142.224 45.2532 4
 0 -11 -5 18567.4 1134.68 3
 0 -11 5 17122.4 961.068 5
 0 11 -5 18700.9 997.296 2
 0 11 -6 67.9477 85.8498 2
 0 -11 -6 39.2081 67.4243 3
 0 -11 6 -63.429 93.7186 5
 0 11 -7 3335.49 469.939 2
 0 -11 7 3928.69 432.198 5
 0 -11 -7 3547.48 540.798 3
 0 11 -8 94.5518 110.408 2
 0 -11 -8 -132.517 181.647 3
 0 -11 8 106.753 71.8576 5
 0 -11 -9 -214.708 153.059 3
 0 11 -9 -128.415 138.817 2
 0 11 -10 256.357 135.973 2
 0 -11 -10 148.268 165.182 3
 0 11 -11 470.215 207.32 2
 0 -11 -11 477.139 230.408 3
 0 -11 -12 -51.4794 70.2551 3
 0 11 -12 72.0518 65.1343 2
 0 11 -13 97.5111 104.565 2
 0 -11 -13 -36.4787 185.963 3
 0 11 -14 -192.48 163.133 2
 0 -11 -14 41.8904 109.501 3
 0 12 0 444.403 108.628 2
 0 -12 0 309.258 129.915 3
 0 -12 0 388.295 162.817 5
 0 12 -1 3331.86 325.124 2
 0 -12 1 3597.35 510.746 5
 0 -12 -1 3917.96 449.825 3
 0 -12 2 1344.21 297.148 5
 0 -12 -2 1242.75 260.755 3
 0 12 -2 1180.07 219.93 2
 0 12 -3 2346.22 323.19 2
 0 -12 3 1964.41 228.713 4
 0 -12 -3 2151.94 361.346 3
 0 -12 3 1932.24 348.418 5
 0 12 -4 622.369 184.566 2
 0 -12 4 493.752 88.2233 4
 0 -12 4 525.354 181.291 5
 0 -12 -4 376.995 158.681 3
 0 -12 5 20.8107 75.4138 5
 0 -12 -5 150.969 99.6098 3
 0 12 -5 -69.8436 88.9215 2
 0 -12 6 528.35 167.688 5
 0 12 -6 511.034 167.09 2
 0 -12 -6 527.936 201.598 3
 0 12 -7 4.28297 99.9018 2
 0 -12 7 -90.0805 94.2966 5
 0 -12 -7 -95.7692 114.703 3
 0 -12 8 4821.95 482.152 5
 0 12 -8 5006.82 616.327 2
 0 -12 -8 5099.07 692.143 3
 0 12 -9 273.46 168.865 2
 0 -12 -9 7.53349 81.2175 3
 0 12 -10 174.054 158.021 2
 0 -12 -10 42.6193 94.5566 3
 0 -12 -11 117.071 89.3908 3
 0 12 -11 89.3681 128.399 2
 0 -12 -12 2748.61 582.775 3
 0 12 -12 3124.03 586.256 2
 0 12 -13 238.38 202.507 2
 0 -12 -13 -141.098 149.248 3
 0 -12 -14 135.376 142.64 3
 0 12 -14 23.4638 128.018 2
 0 13 0 300.088 94.1405 2
 0 -13 0 636.536 243.829 5
 0 -13 1 1931.26 378.929 5
 0 13 -1 1864.6 249.778 2
 0 -13 -1 2139.1 347.795 3
 0 13 -2 473.866 138.53 2
 0 -13 2 306.668 166.756 5
 0 -13 -2 395.703 141.619 3
 0 -13 -3 788.846 230.859 3
 0 -13 3 1073.09 276.578 5
 0 13 -3 1096.29 227.636 2
 0 -13 3 701.213 143.586 4
 0 -13 -4 202.301 103.145 3
 0 13 -4 168.238 102.753 2
 0 -13 4 297.816 154.06 5
 0 -13 5 2453.94 403.513 5
 0 -13 -5 2898.5 472.492 3
 0 13 -5 3308.07 443.022 2
 0 13 -6 325.132 130.84 2
 0 -13 -6 285.045 167.306 3
 0 -13 6 362.202 142.518 5
 0 13 -7 128.4 93.7635 2
 0 -13 7 -61.9951 86.4556 5
 0 -13 8 640.526 189.847 5
 0 13 -8 721.872 259.587 2
 0 -13 -8 682.306 273.417 3
 0 -13 -9 4588.04 705.595 3
 0 13 -9 5201.69 673.354 2
 0 -13 -10 1130.82 366.164 3
 0 13 -10 635.362 234.637 2
 0 13 -11 864.573 304.534 2
 0 -13 -11 802.619 353.019 3
 0 13 -12 425.27 217.782 2
 0 -13 -12 -71.2516 144.396 3
 0 -13 -13 1506.87 465.641 3
 0 13 -13 1131.14 366.044 2
 0 -14 0 4869.95 653.227 5
 0 -14 -1 830.939 225.733 3
 0 14 -1 719.611 162.801 2
 0 -14 1 1099.96 293.532 5
 0 -14 -1 644.02 283.538 5
 0 -14 -2 1467.71 307.112 3
 0 -14 2 1532.85 355.699 5
 0 14 -2 1295.18 236.752 2
 0 -14 -3 8.45219 44.4766 3
 0 14 -3 38.0681 35.6687 2
 0 -14 -4 8286.55 814.272 3
 0 -14 4 8696.32 814.205 5
 0 14 -4 9683.18 738.461 2
 0 -14 -5 3227.4 520.038 3
 0 -14 5 3444.88 505.493 5
 0 14 -5 3291.37 457.597 2
 0 -14 6 381.382 168.603 5
 0 14 -6 299.64 158.592 2
 0 -14 -6 273.825 147.098 3
 0 14 -7 232.129 161.078 2
 0 -14 7 213.694 127.043 5
 0 -14 -7 424.333 239.24 3
 0 14 -8 661.119 264.68 2
 0 -14 -8 321.92 195.597 3
 0 -14 -9 8.87196 59.5201 3
 0 14 -9 12.4951 148.548 2
 0 14 -10 1582.69 390.701 2
 0 -14 -10 1462.08 415.746 3
 0 -14 -11 278.738 205.59 3
 0 14 -11 208.692 163.766 2
 0 14 -12 455.158 228.803 2
 0 -14 -12 310.664 238.649 3
 0 14 -13 374.747 243.321 2
 0 -15 0 363.734 205.998 5
 0 -15 1 -51.112 84.025 5
 0 -15 -1 48.6274 113.279 5
 0 -15 -2 2805.51 519.54 5
 0 -15 -2 2908.64 464.263 3
 0 -15 2 2364.74 453.561 5
 0 15 -3 172.947 91.3633 2
 0 -15 3 66.2386 66.8835 5
 0 -15 -3 88.9484 95.8992 3
 0 15 -4 521.839 180.219 2
 0 -15 4 404.358 183.133 5
 0 -15 -4 584.772 211.748 3
 0 -15 -5 -70.3766 90.9916 3
 0 -15 5 127.336 116.885 5
 0 15 -5 79.7597 89.3225 2
 0 15 -6 1653.44 354.205 2
 0 -15 -6 1654.29 414.795 3
 0 -15 6 975.999 285.332 5
 0 -15 7 6236.72 674.273 5
 0 -15 -7 7582.31 895.883 3
 0 15 -7 6465.11 722.224 2
 0 15 -8 -62.5258 71.9128 2
 0 -15 -8 -141.566 157.44 3
 0 15 -9 -8.62052 50.3546 2
 0 -15 -9 103.748 124.166 3
 0 15 -10 150.888 119.471 2
 0 -15 -10 64.3337 131.347 3
 0 15 -11 493.984 227.15 2
 0 -15 -11 304.232 218.427 3
 0 -15 -12 34.7059 80.1211 3
 0 15 -12 230.845 175.133 2
 0 -15 -12 -189.585 161.61 5
 0 -15 -13 272.988 187.519 5
 0 -16 0 880.285 296.862 5
 0 -16 -1 895.308 307.012 5
 0 -16 1 1933.04 440.191 5
 0 -16 2 660.484 245.066 5
 0 -16 -2 84.5743 136.976 5
 0 -16 3 562.578 238.391 5
 0 -16 -3 509.804 207.851 3
 0 -16 -3 706.259 268.496 5
 0 16 -4 2369.25 383.181 2
 0 -16 4 2024.84 423.229 5
 0 -16 -4 2449 520.975 5
 0 -16 -4 2081.37 439.556 3
 0 -16 5 -38.8589 109.334 5
 0 16 -5 -35.0323 48.5049 2
 0 -16 -5 43.2723 103.226 3
 0 -16 6 31.4163 46.708 5
 0 16 -6 56.5236 82.9785 2
 0 -16 -7 1675.34 429.013 3
 0 16 -7 1183.3 318.494 2
 0 -16 7 839.863 254.331 5
 0 -16 -8 399.503 232.986 3
 0 16 -8 314.142 170.06 2
 0 -16 -9 1192.14 388.877 3
 0 16 -9 1190.58 332.081 2
 0 16 -10 22.0989 49.6161 2
 0 -16 -10 282.956 239.291 3
 0 16 -11 173.544 188.743 2
 0 -16 -11 -29.8715 83.0268 3
 0 -16 -11 -103.44 163.105 5
 0 -16 -12 193.02 176.258 5
 0 16 -12 259.649 184.393 2
 0 -17 0 299.309 205.401 5
 0 -17 -1 -136.127 177.864 5
 0 -17 1 198.323 164.997 5
 0 -17 2 2599.75 513.465 5
 0 -17 -2 2248.87 503.701 5
 0 -17 3 1042.22 341.356 5
 0 -17 -3 1070.33 355.216 5
 0 -17 4 826.98 292.533 5
 0 -17 -4 618.634 268.087 5
 0 -17 5 138.946 135.55 5
 0 -17 -5 -128.185 173.055 5
 0 -17 -5 61.2905 131.388 3
 0 -17 -6 25.3596 110.255 3
 0 -17 6 -33.4032 70.0117 5
 0 -17 -7 724.231 295.266 3
 0 -17 -7 878.969 326.196 5
 0 17 -7 813.459 263.016 2
 0 -17 -8 285.187 182.219 5
 0 17 -8 124.647 133.218 2
 0 -17 -8 246.267 178.295 3
 0 17 -9 -90.0869 109.912 2
 0 -17 -9 -115.978 135.826 5
 0 -17 -9 -26.5627 132.556 3
 0 17 -10 765.894 308.072 2
 0 -17 -10 1491.47 451.008 3
 0 -17 -10 1356.88 419.092 5
 0 17 -11 107.958 103.318 2
 0 -17 -11 13.6612 63.4047 5
 0 -18 0 2423.76 534.088 5
 0 -18 -1 2001.9 487.69 5
 0 -18 1 1820.37 453.835 5
 0 -18 -2 346.073 245.935 5
 0 -18 2 109.913 142.89 5
 0 -18 -3 -238.107 184.037 5
 0 -18 3 -93.4092 144.894 5
 0 -18 -4 365.803 210.87 5
 0 -18 4 40.241 55.3274 5
 0 -18 5 1223.23 358.338 5
 0 -18 -5 982.016 356.354 5
 0 -18 -6 102.352 103.486 5
 0 -18 6 -40.8185 44.5853 5
 0 -18 -7 1829.16 499.495 5
 0 -18 -8 5.81154 172.495 5
 0 -18 -9 -114.978 148.189 5
 0 18 -9 72.2907 60.4668 2
 0 18 -10 -212.452 166.08 2
 0 18 -11 -122.945 131.485 2
 0 -19 0 241.862 188.923 5
 0 -19 1 15.3318 86.5505 5
 0 -19 -1 441.658 262.042 5
 0 -19 2 740.097 297.896 5
 0 -19 -2 1597.81 468.839 5
 0 -19 -3 110.839 134.818 5
 0 -19 3 -96.1282 99.8736 5
 0 -19 -4 -53.8026 115.374 5
 0 -19 4 124.498 127.274 5
 0 -19 5 1807.31 452.538 5
 0 -19 -5 1003.05 404.818 5
 0 -19 -6 1605.31 484.795 5
 0 -19 -7 -105.14 139.856 5
 0 -20 0 451.037 264.732 5
 0 -20 1 463.304 270.161 5
 0 -20 -1 17.6367 78.2145 5
 0 -20 2 299.285 198.914 5
 0 -20 -2 193.128 200.85 5
 0 -20 3 133.308 140.753 5
 0 -20 -3 242.161 197.632 5
 0 -20 -4 457.53 268.902 5
 0 -20 4 -24.206 126.297 5
 0 -20 -5 486.192 274.713 5
 0 -20 5 314.701 184.423 5
 0 -21 0 56.9208 148.231 5
 0 -21 1 439.873 262.384 5
 0 -21 -1 11.548 113.192 5
 0 -21 2 1066.9 394.829 5
 0 -21 3 200.792 156.74 5
 0 -21 4 -84.1435 123.174 5
 0 -21 5 -205.953 169.383 5
 1 0 -18 -227.97 170.405 2
 1 0 -17 31.0501 73.6631 2
 1 0 -16 -77.3701 82.2074 2
 1 0 -15 85.0184 90.3013 3
 1 0 -15 428.995 201.445 2
 1 0 -14 31.6119 71.0837 2
 1 0 -14 142.774 129.189 3
 1 0 -13 114.847 82.6109 3
 1 0 -13 267.026 154.47 2
 1 0 -12 -65.2071 124.45 2
 1 0 -12 -41.0131 46.3398 3
 1 0 -11 27735.4 1217.3 3
 1 0 -11 26975.5 1254.76 2
 1 0 -10 -44.6756 78.4086 2
 1 0 -10 -33.2109 49.9968 3
 1 0 -9 821.982 192.507 2
 1 0 -9 780.316 176.585 3
 -1 0 8 45.3809 44.0297 1
 1 0 -8 -14.8688 57.1133 2
 1 0 -8 -8.11082 35.8429 3
 1 0 -7 38104.3 726.868 5
 1 0 -7 37926.9 1120.31 2
 -1 0 7 37970.2 850.525 1
 1 0 -6 -31.5533 57.2686 2
 1 0 -6 35.6 28.3015 1
 1 0 -6 -5.90503 14.5362 5
 -1 0 6 37.4311 29.2546 1
 1 0 -5 22806.9 487.752 5
 -1 0 5 22130.3 524.756 1
 1 0 -5 20932.3 679.803 2
 -1 0 5 20673.1 484.89 5
 1 0 -5 21039.8 548.079 1
 1 0 -4 11.4856 16.4876 5
 -1 0 4 27.6652 24.7995 1
 1 0 -4 -6.59713 16.0751 1
 1 0 -4 -10.009 12.7576 2
 -1 0 4 24.2541 21.2281 5
 1 0 -3 150381 1013.43 1
 -1 0 3 150643 1031.85 5
 -1 0 -2 -9.4357 21.1892 2
 -1 0 -3 64570.3 1103.83 2
 -1 0 -3 62583.1 1047.6 3
 -1 0 -4 -8.67593 17.7337 2
 1 0 4 18.198 22.5442 3
 -1 0 -4 -3.02702 20.1275 3
 -1 0 -5 23365 389.304 5
 1 0 5 24254.8 725.318 1
 -1 0 -5 23846.8 830.239 2
 -1 0 -5 22875.7 785.82 3
 -1 0 -6 8.0371 8.1932 5
 -1 0 -6 -13.9089 44.8206 3
 -1 0 -6 11.6415 41.7399 2
 -1 0 -7 55.5828 83.2818 2
 -1 0 -7 29.9875 19.1765 5
 -1 0 -7 -38.6409 43.359 3
 1 0 7 43.4237 37.9042 1
 -1 0 -8 20.9448 19.3979 5
 -1 0 -8 -8.78576 52.0466 3
 -1 0 -8 -64.2166 78.895 2
 1 0 8 -46.0507 71.3595 1
 -1 0 -9 416.455 174.522 3
 -1 0 -9 337.255 60.9989 5
 1 0 9 125.605 62.3784 1
 -1 0 -9 310.181 136.024 2
 1 0 10 10.1708 64.5685 1
 -1 0 -10 -66.3432 78.5846 2
 -1 0 -10 -84.9512 102.266 3
 -1 0 -11 15525.5 1008.46 2
 1 0 11 15823 821.377 1
 -1 0 -11 15913.6 981.181 3
 -1 0 -12 -48.7623 116.789 2
 1 0 12 180.653 102.829 1
 -1 0 -12 47.7563 53.9846 3
 -1 0 -13 2147.36 412.66 2
 1 0 13 2502.18 348.373 1
 -1 0 -14 -0.27489 58.7155 2
 -1 0 -15 -268.705 167.533 2
 -1 0 -16 -68.113 94.0511 2
 -1 0 -17 1665.03 437.798 2
 -1 0 -18 94.7959 119.947 2
 1 1 -18 888.156 314.541 2
 1 -1 -18 1290.71 381.294 2
 1 -1 -17 -217.377 155.619 2
 1 1 -17 90.9576 105.323 2
 1 -1 -16 794.062 278.732 2
 1 -1 -16 1267.62 339.338 3
 1 1 -16 653.905 252.365 2
 1 1 -15 220.788 153.649 2
 1 -1 -15 130.653 87.3258 3
 1 -1 -15 -29.112 49.2853 2
 1 1 -14 7134.2 772.977 2
 1 -1 -14 6424.3 706.965 3
 1 1 -14 6362.22 653.179 3
 1 -1 -14 7070.53 742.469 2
 1 -1 -13 -20.6333 72.017 2
 1 1 -13 75.1427 86.0066 3
 1 1 -13 -73.087 86.0062 2
 1 -1 -13 -5.85253 96.123 3
 1 -1 -12 149.958 60.5315 2
 1 1 -12 164.984 66.2053 3
 1 -1 -12 190.074 119.598 3
 1 1 -12 115.306 97.8762 2
 1 -1 -11 -26.3015 76.8422 3
 -1 -1 11 13.5379 45.7431 1
 1 1 -11 -62.7275 113.386 2
 1 -1 -11 -8.72459 90.4843 2
 1 1 -11 63.3881 76.6834 3
 1 -1 -10 -10.2271 31.1368 3
 1 1 -10 95.4356 69.937 3
 1 -1 -10 -0.46284 45.8502 2
 -1 -1 10 45.9924 55.8234 1
 1 1 -10 80.8069 44.2123 2
 -1 -1 9 651.14 128.184 1
 1 1 -9 666.856 165.779 2
 1 1 -9 660.775 154.936 3
 1 -1 -9 618.664 161.974 2
 1 -1 -9 505.897 151.604 3
 -1 -1 8 4981.72 325.445 1
 1 1 -8 4462.32 266.351 5
 1 1 -8 5212.45 406.02 3
 1 1 -8 4783.9 449.813 2
 1 -1 -8 5249.61 449.513 3
 1 -1 -8 5139.39 440.139 2
 1 1 -7 41833.1 753.336 5
 -1 -1 7 40044.5 724.526 5
 1 -1 -7 40516.1 1129.4 2
 -1 -1 7 42045.7 876.81 1
 1 1 -7 41123.3 1208.04 2
 1 -1 -6 57.1718 31.2615 5
 -1 -1 6 32.0413 19.9823 5
 -1 -1 6 74.9245 29.6657 1
 1 -1 -6 12.2622 50.2758 2
 1 1 -6 22.0066 32.0109 2
 1 1 -6 37.5799 19.1206 5
 1 1 -5 8525.39 304.821 5
 1 -1 -5 8881.79 324.714 5
 1 -1 -5 7668.8 393.423 2
 1 -1 -5 8093.63 359.072 1
 -1 -1 5 8478.97 281.638 5
 1 1 -5 7865.1 436.623 2
 -1 -1 5 8191.39 311.857 1
 -1 -1 4 56706.4 692.522 1
 1 -1 -4 59399.8 787.356 5
 1 -1 -4 58434.3 829.35 1
 1 1 -4 57846.2 743.59 5
 1 1 -4 57984.5 1039.07 2
 -1 -1 4 57015.8 679.013 5
 1 -1 -4 59126.6 937.685 2
 -1 -1 3 29187.5 456.509 5
 -1 -1 3 27896.7 382.517 1
 -1 1 -2 18657.1 543.75 2
 -1 -1 -2 17434.7 474.239 1
 -1 -1 -2 18232.7 470.283 2
 -1 -1 -2 17616.7 540.33 3
 -1 -1 -3 12358.7 443.08 1
 -1 -1 -3 11363.6 487.963 3
 -1 -1 -3 11097.3 437.644 2
 1 -1 3 11103.3 388.517 3
 -1 1 -3 11193.7 481.211 2
 -1 1 -4 9368.2 495.991 2
 -1 1 -4 8968.03 407.912 3
 -1 -1 -4 9144.82 452.817 2
 1 -1 4 9474.54 398.187 3
 -1 -1 -4 9482.61 493.284 3
 -1 -1 -5 11909.5 602.796 3
 -1 -1 -5 12738.8 587.008 2
 1 -1 5 12445.9 511.549 1
 1 1 5 12843.3 540.906 1
 -1 1 -5 12466.7 624.977 2
 -1 1 -5 12123.8 532.754 3
 -1 -1 -6 3721.15 349.729 2
 -1 1 -6 3772.86 326.393 3
 -1 1 -6 3826.94 374.475 2
 -1 -1 -6 3599.3 356.796 3
 -1 1 -6 3669.28 138.826 5
 1 -1 6 3398.62 297.331 1
 1 1 6 4097.63 325.985 1
 -1 -1 -7 2118.77 160.719 5
 1 -1 7 2040.03 238.767 1
 1 1 7 1871.13 238.971 1
 -1 1 -7 1664.95 262.54 2
 -1 1 -7 1738.47 241.729 3
 -1 1 -7 1984.2 113.736 5
 -1 -1 -7 2384.73 301.922 2
 -1 -1 -7 1811.33 269.023 3
 -1 -1 -8 6096.54 518.536 2
 -1 1 -8 5252.76 455.304 3
 -1 -1 -8 5421.23 263.792 5
 -1 1 -8 5065.91 199.079 5
 1 -1 8 5803.01 431.791 1
 1 1 8 5384.31 424.803 1
 -1 1 -8 5691.72 525.646 2
 -1 -1 -8 6020.73 524.985 3
 -1 1 -9 918.653 90.9178 5
 -1 1 -9 1171.18 260.636 2
 -1 1 -9 667.464 171.65 3
 1 1 9 849.538 176.084 1
 -1 -1 -9 870.198 211.472 2
 -1 -1 -9 914.865 212.203 3
 1 -1 9 905.647 185.004 1
 -1 1 -10 1063.78 261.268 2
 -1 -1 -10 730.528 207.231 3
 1 1 10 1043.41 207.641 1
 1 -1 10 1031.08 205.337 1
 -1 -1 -10 831.327 218.234 2
 -1 1 -10 938.303 222.258 3
 -1 1 -11 4410.53 553.89 2
 -1 -1 -11 4954.36 560.558 3
 1 1 11 4737.23 453.615 1
 -1 -1 -11 4865.69 560.383 2
 1 -1 11 4430.95 430.685 1
 -1 -1 -12 3644.02 514.337 2
 -1 -1 -12 3452.47 490.027 3
 -1 1 -12 2906.93 470.711 2
 1 -1 12 2992.64 370.23 1
 -1 -1 -13 1109.49 300.304 2
 -1 1 -13 1019.9 280.243 2
 1 -1 13 1027.47 230.195 1
 1 -1 14 -16.1423 55.7801 1
 -1 -1 -14 91.603 98.2274 2
 -1 1 -14 -2.54557 48.8666 2
 -1 -1 -15 -144.13 116.196 2
 -1 1 -15 151.276 137.489 2
 -1 1 -16 993.232 320.695 2
 -1 -1 -16 861.901 291.268 2
 -1 -1 -17 491.521 246.841 2
 -1 1 -17 58.3556 91.3798 2
 -1 -1 -18 148.789 171.043 2
 1 2 -18 261.362 205.734 2
 1 -2 -18 166.209 156.74 2
 1 2 -17 142.32 120.567 2
 1 -2 -17 95.1846 105.797 2
 1 -2 -16 129.653 137.17 3
 1 2 -16 98.1677 73.4749 2
 1 -2 -16 245.419 159.916 2
 1 2 -15 906.701 288.785 2
 1 -2 -15 1052.55 302.118 2
 1 -2 -15 547.354 208.137 3
 1 2 -14 300.706 128.608 2
 1 -2 -14 102.985 76.9444 2
 1 -2 -14 387.868 168.343 3
 1 2 -13 3241.03 501 2
 1 -2 -13 2981.31 478.483 3
 1 -2 -13 3225.5 473.118 2
 1 2 -13 3174.11 429.185 3
 1 2 -12 -7.61822 52.9594 2
 1 -2 -12 46.7162 52.3831 2
 1 2 -12 0.47286 48.2455 3
 1 -2 -12 4.83379 75.2611 3
 -1 -2 12 93.9342 56.5915 1
 1 -2 -11 510.689 182.27 3
 -1 -2 11 394.976 104.906 1
 1 -2 -11 224.167 103.104 2
 1 2 -11 -54.2257 121.431 2
 1 2 -11 191.83 95.5945 3
 1 2 -10 649.611 181.209 2
 -1 -2 10 711.896 137.049 1
 1 2 -10 686.4 160.354 3
 1 -2 -10 652.266 172.28 2
 1 -2 -10 831.54 220.098 3
 1 2 -9 619.681 108.265 5
 1 2 -9 360.79 113.472 3
 1 2 -9 403.219 138.954 2
 1 -2 -9 475.916 138.85 2
 -1 -2 9 553.426 117.458 1
 1 -2 -9 705.089 181.897 3
 1 -2 -8 2734.11 344.027 3
 1 2 -8 2726.65 351.571 2
 -1 -2 8 3016.93 251.633 1
 -1 -2 8 2838.08 191.351 5
 1 2 -8 2679.96 273.897 3
 1 -2 -8 2739.8 315.924 2
 1 2 -8 2547.5 206.66 5
 1 2 -7 28165.6 662.072 5
 1 -2 -7 27082.6 898.656 2
 1 2 -7 29880.6 1053.79 2
 -1 -2 7 29311.1 723.316 1
 1 -2 -7 30169.9 1052.68 3
 -1 -2 7 28453.9 568.49 5
 1 -2 -6 739.769 131.752 2
 -1 -2 6 828.408 110.117 1
 1 2 -6 749.647 102.567 5
 -1 -2 6 878.403 94.1131 5
 1 2 -6 732.893 155.668 2
 -1 -2 5 5106.88 244.504 1
 1 2 -5 5339.06 369.764 2
 1 2 -5 5289.02 263.642 5
 -1 -2 5 5353.8 226.702 5
 1 -2 -5 4772.41 298.285 2
 1 2 -4 7115.95 385.204 2
 1 2 -4 7199.88 297.644 5
 1 -2 -4 7148.24 305.488 2
 -1 -2 4 7341.25 268.276 5
 1 -2 -4 7591.04 321.386 5
 1 2 -3 8651.71 319.224 5
 -1 -2 3 8023.52 286.772 5
 -1 -2 2 30424.8 578.368 5
 -1 2 -1 617.55 88.8813 2
 -1 -2 -1 483.568 70.9435 1
 -1 -2 -1 437.802 76.4901 5
 -1 -2 -2 604163 3444.11 3
 1 2 2 612324 2503.16 2
 -1 2 -2 598560 3263.84 2
 1 -2 3 101016 999.93 3
 -1 -2 -3 100430 1564.82 3
 1 2 3 102474 1221.07 2
 -1 -2 -3 99060.9 1223.26 2
 -1 -2 -3 98553 1332.8 1
 -1 2 -3 100022 1512.45 2
 1 -2 4 20.1539 14.9584 3
 -1 -2 -4 44.5754 40.3092 2
 -1 2 -4 45.2923 40.1226 2
 1 2 4 -16.1306 15.2644 2
 -1 -2 -4 -9.27511 34.5548 3
 -1 -2 -5 2194.64 273.869 3
 1 2 5 2229.92 231.846 1
 -1 2 -5 1801.13 245.525 2
 -1 -2 -5 1949.48 222.35 2
 -1 2 -6 39685.4 1242.32 2
 -1 2 -6 37411.1 954.632 3
 -1 -2 -6 39797 1247.35 3
 -1 -2 -6 38812.1 1092.94 2
 1 2 6 40330.1 1042.64 1
 -1 2 -7 193.567 99.0022 2
 -1 -2 -7 -9.59522 33.4851 2
 -1 -2 -7 35.2311 29.8154 3
 1 -2 7 144.075 72.2728 1
 -1 2 -7 65.1673 40.8725 3
 -1 -2 -8 2634.48 368.05 3
 1 -2 8 2381.33 280.384 1
 -1 2 -8 2761.31 379.258 2
 -1 -2 -8 2586.47 333.665 2
 1 2 8 2669.09 302.933 1
 -1 2 -8 2363.64 281.856 3
 1 2 9 281.959 111.117 1
 -1 -2 -9 299.92 115.268 2
 -1 -2 -9 157.989 100.036 3
 1 -2 9 159.421 76.9937 1
 -1 2 -9 282.513 118.842 2
 -1 -2 -10 4618.22 529.104 3
 -1 2 -10 5679.86 609.269 2
 1 -2 10 5057.25 443.337 1
 -1 -2 -10 5244.16 545.031 2
 1 -2 11 2455.8 326.727 1
 -1 -2 -11 2529.54 388.896 2
 -1 2 -11 2260.86 394.884 2
 -1 -2 -11 2267.49 393.548 3
 -1 2 -12 3382.15 522.54 2
 -1 -2 -12 3589.53 496.025 2
 1 -2 12 3847.54 412.165 1
 -1 -2 -12 3131.12 481.803 3
 -1 -2 -13 -88.9069 119.533 3
 -1 2 -13 25.5865 74.2717 2
 -1 -2 -13 -43.6728 82.1631 2
 1 -2 13 173.613 104.4 1
 -1 -2 -14 1445 354.547 2
 -1 2 -14 1187.09 334.85 2
 1 -2 14 1462.54 269.154 1
 -1 -2 -15 -1.42242 93.7339 2
 -1 2 -15 172.266 124.574 2
 -1 2 -16 80.9225 88.2628 2
 -1 -2 -16 379.984 187.373 2
 -1 -2 -17 -66.9704 94.0715 2
 -1 2 -17 181.231 165.653 2
 1 -3 -17 177.034 118.432 3
 1 3 -17 103.918 127.883 2
 1 -3 -17 62.3951 90.139 2
 1 -3 -16 32.5455 106.717 3
 1 3 -16 404.744 207.713 2
 1 -3 -16 141.027 118.485 2
 1 -3 -15 -11.9606 105.346 3
 1 -3 -15 91.0673 117.005 2
 1 3 -15 239.257 167.861 2
 1 -3 -14 -122.907 113.313 3
 1 3 -14 11.2914 81.5918 2
 1 -3 -14 85.6455 86.4936 2
 1 -3 -13 -40.0297 41.5093 2
 1 3 -13 209.477 163.462 2
 1 -3 -13 63.1702 78.6317 3
 -1 -3 13 192.104 89.8866 1
 1 3 -12 25.8163 59.6733 3
 -1 -3 12 51.1849 41.1777 1
 1 -3 -12 79.1716 79.3938 2
 1 3 -12 -105.806 137.313 2
 1 -3 -12 57.7603 53.12 3
 1 3 -11 87.2761 81.8876 2
 1 -3 -11 33.3705 63.6677 3
 -1 -3 11 -5.44675 20.014 1
 1 -3 -11 -24.8806 73.1176 2
 1 3 -11 48.1813 66.4581 3
 -1 -3 10 1505.42 204.124 1
 1 -3 -10 1270.73 241.513 2
 -1 -3 10 1601.74 151.021 5
 1 -3 -10 1430.83 282.289 3
 1 3 -10 1511.83 293.909 2
 1 3 -10 1149.08 205.731 3
 1 3 -9 2467.42 218.54 5
 -1 -3 9 2262.93 233.602 1
 1 -3 -9 1990.82 322.838 3
 1 3 -9 2735.5 382.167 2
 1 -3 -9 2257.73 295.409 2
 -1 -3 9 2510.84 182.334 5
 1 3 -9 2393.6 269.324 3
 1 3 -8 310.322 87.7665 3
 -1 -3 8 262.463 73.669 1
 1 -3 -8 176.369 82.4575 3
 -1 -3 8 190.311 48.2639 5
 1 -3 -8 286.09 94.6939 2
 1 3 -8 196.094 75.3747 2
 1 3 -8 286.037 73.4399 5
 1 3 -7 3591.87 384.755 2
 -1 -3 7 4299.26 274.158 1
 1 -3 -7 4038.01 402.478 3
 -1 -3 7 4398.53 224.971 5
 1 3 -7 4024.81 268.483 5
 1 -3 -7 3697.25 319.077 2
 1 -3 -6 1646.64 189.779 2
 1 3 -6 1427.84 221.159 2
 -1 -3 6 1715.76 141.885 5
 1 3 -6 1487.27 158.92 5
 1 -3 -5 18650.5 557.013 2
 1 3 -5 19316.6 736.47 2
 1 3 -5 18667.5 558.694 5
 -1 -3 5 19020.1 486.085 5
 1 -3 -4 23101.4 512.504 2
 1 3 -4 22721.8 720.051 2
 -1 -3 4 21897.3 548.207 5
 1 3 -4 23136.3 612.679 5
 1 3 -3 26258.3 654.788 5
 1 3 -3 26891.8 693.224 2
 -1 -3 3 25961.8 623.075 5
 1 3 -2 73014.4 740.802 4
 -1 -3 2 70910.1 1075.77 5
 -1 -3 1 49805.2 917.821 5
 -1 -3 1 51092.1 734.397 4
 -1 3 0 128257 1136.43 2
 -1 -3 0 128336 1530.18 5
 -1 3 -1 158464 1551.25 2
 -1 -3 -1 163443 1752.73 3
 -1 -3 -2 6719.78 321.775 1
 1 3 2 6545.51 236.315 2
 -1 -3 -2 6033.71 377.789 3
 -1 3 -2 6721.55 363.83 2
 -1 3 -3 80781.5 1416.31 2
 1 -3 3 76586.8 704.888 3
 -1 -3 -3 79766.7 1499.99 3
 -1 3 -3 78007.6 706.549 4
 1 -3 3 78083.1 843.976 5
 1 3 3 81275.3 993.669 2
 -1 -3 -3 80334.4 1020.56 2
 1 -3 4 7337.88 209.644 5
 -1 -3 -4 7408.51 365.745 2
 -1 3 -4 7407.28 287.392 4
 -1 -3 -4 7310.82 486.574 3
 -1 3 -4 7693.45 482.048 2
 1 3 4 7100.35 345.46 2
 -1 -3 -5 19182 668.465 2
 -1 3 -5 18454.5 815.948 2
 -1 -3 -5 20754.7 882.207 3
 -1 -3 -6 85228 1569.11 2
 -1 -3 -6 89689.4 1953.29 3
 -1 3 -6 84288 1880.69 2
 -1 -3 -7 2278.18 331.981 3
 -1 -3 -7 2210.4 273.927 2
 -1 3 -7 2071.87 312.923 2
 -1 3 -8 591.407 183.803 2
 -1 -3 -8 698.04 187.031 3
 -1 -3 -8 983.585 191.397 2
 1 -3 8 955.783 176.41 1
 1 -3 9 2765.08 314.764 1
 -1 -3 -9 3144.94 379.165 2
 -1 3 -9 2602.65 398.248 2
 -1 -3 -9 2787.88 407.571 3
 -1 3 -10 7214.23 692.971 2
 -1 -3 -10 7586.11 702.581 3
 1 -3 10 6962.41 521.957 1
 -1 -3 -10 7175.94 616.921 2
 -1 -3 -11 8674.68 787.887 3
 -1 -3 -11 8452.67 714.555 2
 -1 3 -11 8230.91 781.392 2
 1 -3 11 8393.46 593.9 1
 -1 -3 -12 926.689 278.814 3
 -1 -3 -12 706.508 223.471 2
 -1 3 -12 1023.4 287.5 2
 1 -3 12 759.458 186.454 1
 -1 -3 -13 190.006 98.5807 2
 1 -3 13 258.022 110.56 1
 -1 -3 -13 102.878 77.8436 3
 -1 -3 -14 -10.034 68.5125 2
 -1 3 -14 36.1094 133.695 2
 -1 3 -15 1059.94 314.504 2
 -1 -3 -15 552.242 214.839 2
 -1 3 -16 287.317 219.604 2
 -1 -3 -16 226.793 177.412 2
 -1 3 -17 -74.2705 107.862 2
 1 -4 -17 -381.811 215.24 3
 1 4 -17 239.731 158.614 2
 1 4 -16 55.5736 88.5859 2
 1 -4 -16 59.9427 80.5597 3
 1 -4 -16 29.4799 45.3831 2
 1 -4 -15 1565.8 348.022 2
 1 -4 -15 861.61 302.367 3
 1 4 -15 1267.48 358.074 2
 1 -4 -14 141.895 107.489 2
 1 -4 -14 222.114 135.561 3
 1 4 -14 125.402 129.612 2
 1 -4 -13 45.6121 111.705 2
 1 4 -13 -10.0731 97.235 2
 1 -4 -13 -17.6501 81.2008 3
 1 4 -12 3353.99 507.893 2
 -1 -4 12 4064.95 359.802 1
 1 -4 -12 3724.96 461.04 2
 1 -4 -12 3387.89 513.894 3
 1 4 -11 310.494 106.754 3
 1 -4 -11 296.956 123.744 2
 1 -4 -11 325.924 153.71 3
 1 4 -11 90.2949 90.115 2
 -1 -4 11 384.409 109.546 1
 -1 -4 10 948.057 113.94 5
 1 4 -10 832.886 161.257 3
 1 -4 -10 827.966 231.806 3
 1 -4 -10 871.694 191.852 2
 1 4 -10 878.876 227.713 2
 -1 -4 10 983.112 163.864 1
 -1 -4 9 3834.2 305.643 1
 -1 -4 9 3829.5 223.089 5
 1 4 -9 3621.24 452.69 2
 1 -4 -9 4326.08 498.292 3
 1 -4 -9 2791.57 329.329 2
 1 4 -9 3282.8 295.919 3
 1 -4 -8 1807.93 306.086 3
 1 4 -8 1563.43 183.497 3
 1 4 -8 1420.15 256.814 2
 1 4 -8 1383.95 170.574 5
 -1 -4 8 1191 158.358 1
 -1 -4 8 1502.76 140.705 5
 1 -4 -8 1428.06 213.431 2
 1 -4 -7 21444.7 742.945 2
 1 4 -7 21020.8 947.687 2
 1 4 -7 20922.1 662.747 5
 1 -4 -7 19815.8 946.179 3
 -1 -4 7 20766.4 533.175 5
 -1 -4 6 6660.17 315.876 5
 1 4 -6 6698.94 491.218 2
 1 4 -6 6614.3 369.785 5
 1 -4 -6 6538.34 368.238 2
 1 -4 -6 7216.69 532.263 3
 1 4 -5 12465.4 619.306 2
 -1 -4 5 12584.3 458.137 5
 1 4 -5 12727.2 512.175 5
 1 -4 -5 12602 430.372 2
 -1 -4 4 1034.94 138.6 5
 1 -4 -4 1124.16 103.375 2
 1 4 -4 1017.82 145.992 5
 1 4 -4 1050.35 165.002 2
 1 4 -3 4875.31 317.92 5
 1 4 -3 4983.88 192.561 4
 1 4 -3 4704.03 307.17 2
 -1 -4 3 4803.29 309.332 5
 -1 -4 2 16981.7 390.813 4
 -1 -4 2 15251.4 572.63 5
 1 -4 -1 1304.63 100.944 2
 1 4 -1 1406.46 139.176 3
 -1 -4 1 1125.17 159.255 5
 -1 -4 0 7130.79 407.008 5
 -1 4 0 6605.04 280.854 2
 1 -4 0 6538.34 277.146 2
 -1 -4 -1 172118 1991.42 3
 -1 4 -1 173187 1722.62 2
 -1 -4 -2 310.214 94.5656 3
 1 4 2 301.746 45.8453 2
 -1 4 -2 267.041 75.0531 2
 1 -4 3 32799.6 695.534 5
 -1 -4 -3 32123.9 1006.92 3
 -1 4 -3 32372.1 940.656 2
 1 4 3 33335.1 582.244 2
 1 4 4 28252.4 630.379 2
 -1 -4 -4 28910.3 1030.95 3
 -1 -4 -4 28018.6 660.493 2
 -1 4 -4 28700.7 966.962 2
 1 -4 4 28202.5 584.08 5
 -1 -4 -5 88.8841 95.5766 3
 -1 4 -5 87.5509 31.4362 4
 1 -4 5 114.102 32.6533 5
 1 4 5 85.607 37.3485 2
 -1 4 -5 70.7887 40.7751 2
 -1 -4 -5 62.955 34.3421 2
 -1 -4 -6 -10.0061 36.6863 2
 1 -4 6 13.0379 10.482 5
 -1 -4 -6 -11.4148 55.1455 3
 -1 4 -6 47.8786 71.2073 2
 -1 -4 -7 933.054 174.443 2
 -1 4 -7 781.424 188.303 2
 -1 -4 -7 981.357 229.93 3
 -1 4 -8 5529.67 554.222 2
 -1 -4 -8 4454.53 412.691 2
 -1 -4 -8 4474.08 507.347 3
 -1 -4 -9 108.952 83.2903 2
 1 -4 9 -8.74483 42.9166 1
 -1 -4 -9 47.3116 81.8792 3
 -1 4 -9 -32.2919 109.268 2
 -1 -4 -10 4588.35 481.86 2
 -1 -4 -10 4171.45 544.2 3
 -1 4 -10 5051.62 596.406 2
 1 -4 10 4400.46 409.331 1
 1 -4 11 43.9679 35.1648 1
 -1 -4 -11 43.4408 49.9209 2
 -1 -4 -11 -30.534 73.2212 3
 -1 4 -11 64.3828 86.4163 2
 -1 -4 -12 179.81 155.553 3
 1 -4 12 128.405 62.7175 1
 -1 4 -12 149.354 100.196 2
 -1 -4 -12 85.3101 89.6322 2
 -1 4 -13 802.816 262.214 2
 1 -4 13 1006.43 218.718 1
 -1 -4 -13 810.014 273.523 3
 -1 -4 -13 1124.8 285.556 2
 -1 -4 -14 -19.7336 108.811 3
 -1 -4 -14 153.19 110.126 2
 -1 4 -14 -187.654 142.166 2
 -1 -4 -15 -77.9309 88.7359 2
 -1 4 -15 107.422 96.2867 2
 -1 4 -16 329.801 200.758 2
 1 -5 -18 81.7275 121.426 3
 1 5 -17 532.925 258.176 2
 1 -5 -17 557.343 280.46 3
 1 -5 -16 291.281 169.121 3
 1 5 -16 189.598 179.326 2
 1 5 -15 367.553 215.467 2
 1 -5 -15 114.924 77.7373 3
 1 -5 -14 265.008 146.301 2
 1 5 -14 94.5869 69.672 2
 1 -5 -14 14.9241 93.2695 3
 1 -5 -13 656.84 230.567 3
 1 5 -13 615.886 208.979 2
 1 -5 -13 880.152 225.786 2
 1 5 -12 2020.5 403.818 2
 1 -5 -12 1603.34 362.374 3
 1 -5 -12 1751.89 310.892 2
 -1 -5 12 1467.8 218.334 1
 1 -5 -11 64.4185 70.3198 2
 -1 -5 11 3.36735 21.7095 1
 1 -5 -11 33.5619 88.4325 3
 1 5 -11 163.585 113.075 2
 1 5 -10 3093.1 450.616 2
 1 -5 -10 2314.59 394.529 3
 -1 -5 10 2351.84 180.089 5
 1 -5 -10 2866.61 345.177 2
 1 5 -10 2311.1 250.58 3
 -1 -5 10 2816.45 278.267 1
 1 5 -9 5859.15 361.219 3
 1 -5 -9 5273.9 433.503 2
 1 -5 -9 6560.59 628.933 3
 -1 -5 9 6236.84 301.333 5
 1 5 -9 6164.39 600.832 2
 1 5 -8 1205.25 146.869 3
 -1 -5 8 998.937 125.405 5
 1 5 -8 1278.7 256.916 2
 1 -5 -8 1011.81 251.689 3
 1 -5 -8 759.967 150.798 2
 1 -5 -7 8459.02 450.029 2
 -1 -5 7 8784.78 387.14 5
 1 5 -7 9121.83 472.015 5
 1 5 -7 8729.25 335.939 3
 1 5 -7 9683.1 665.853 2
 1 -5 -7 8656.02 654.601 3
 1 5 -6 1532.32 245.49 2
 1 -5 -6 1695.93 176.149 2
 1 -5 -6 1591.2 268.248 3
 -1 -5 6 1707.99 182.194 5
 1 5 -6 1541.25 192.322 5
 1 5 -5 98.3175 51.6887 5
 1 -5 -5 85.1982 31.1196 2
 1 -5 -5 224.284 112.475 3
 1 5 -5 55.9233 51.7698 2
 -1 -5 5 138.291 58.2848 5
 1 5 -4 15506.4 654.933 2
 1 -5 -4 14495.1 342.141 2
 1 5 -4 15008.7 328.807 4
 -1 -5 4 15405.6 599.616 5
 -1 -5 3 24179.7 785.218 5
 1 5 -3 25264.1 752.7 2
 -1 -5 2 3705.27 314.104 5
 1 5 -2 3533.75 249.267 2
 1 5 -2 3902.44 222.6 3
 -1 -5 2 3693.29 213.927 4
 1 5 -1 79.5701 36.7781 3
 -1 -5 1 59.5121 48.6858 5
 1 -5 -1 88.3861 25.9559 2
 1 5 0 25781.4 723.691 3
 1 -5 0 25208.4 578.73 2
 -1 -5 0 25333.6 864.103 5
 -1 5 0 25713.6 598.669 2
 1 -5 1 61276.2 1045.82 2
 -1 -5 -1 63231.6 1286.2 3
 -1 5 -1 59992.3 1073.75 2
 -1 -5 -2 109.869 53.9367 3
 -1 5 -2 213.178 73.1473 2
 1 -5 3 4279.7 294.476 5
 -1 5 -3 4387.04 355.671 2
 -1 -5 -3 4536.75 405.64 3
 1 5 3 4477.01 188.797 2
 1 -5 4 23792.8 650.853 5
 1 5 4 23091.5 519.697 2
 -1 -5 -4 23176.8 971.144 3
 -1 5 -4 22134.6 874.211 2
 -1 -5 -5 46.3782 52.3216 3
 1 5 5 52.9004 23.8076 2
 -1 5 -5 -20.5935 31.3573 2
 -1 -5 -5 27.8703 19.2593 2
 1 -5 5 38.0936 17.7928 5
 -1 5 -6 5773.13 517.966 2
 1 -5 6 5328.25 244.078 5
 -1 -5 -6 5146.23 516.515 3
 -1 5 -6 5133.42 218.86 4
 -1 -5 -6 5215.25 352.491 2
 -1 -5 -7 1131.71 258.996 3
 1 -5 7 720.596 71.4024 5
 -1 5 -7 744.267 103.815 4
 -1 -5 -7 912.942 166.321 2
 -1 5 -7 637.614 178.059 2
 -1 -5 -8 2763.44 411.556 3
 -1 5 -8 2740.33 234.406 4
 -1 5 -8 2863.72 409.757 2
 -1 -5 -8 2539.21 304.662 2
 -1 -5 -9 4454.98 546.836 3
 -1 5 -9 3649.43 489.432 2
 -1 5 -9 4358.48 330.541 4
 -1 -5 -9 3895.86 402.57 2
 -1 5 -10 6473.46 680.147 2
 -1 -5 -10 6363.95 555.579 2
 -1 5 -10 7351.9 467.486 4
 1 -5 10 6877.95 519.25 1
 -1 -5 -10 6930.72 721.115 3
 -1 -5 -11 175.957 132.226 3
 -1 -5 -11 268.286 130.514 2
 1 -5 11 118.122 72.4181 1
 -1 5 -11 19.6684 92.3067 2
 -1 -5 -12 -27.7398 78.4838 2
 -1 5 -12 211.531 138.783 2
 1 -5 12 63.4671 27.4894 1
 -1 -5 -12 -176.189 133.287 3
 -1 -5 -13 2069.99 454.3 3
 -1 5 -13 2273.96 462.382 2
 -1 -5 -13 2234.22 386.897 2
 -1 -5 -14 126.816 86.1802 3
 -1 -5 -14 389.868 181.469 2
 -1 5 -14 394.717 174.898 2
 -1 5 -15 184.477 141.522 2
 -1 5 -16 370.436 255.228 2
 1 -6 -18 112.451 135.03 3
 1 -6 -17 176.132 173.088 3
 1 -6 -16 695.512 298.585 3
 1 6 -16 643.932 262.518 2
 1 -6 -15 54.3659 86.9318 3
 1 6 -15 5.30914 60.1911 2
 1 6 -14 1083.6 316.5 2
 1 -6 -14 1136.98 341.931 3
 1 -6 -13 260.975 113.409 2
 1 6 -13 299.841 190.33 2
 1 -6 -13 161.135 147.534 3
 1 6 -12 278.743 143.422 2
 1 -6 -12 261.042 175.316 3
 1 -6 -12 193.109 105.955 2
 -1 -6 11 170.388 71.7339 1
 1 6 -11 21.0761 76.0457 2
 1 -6 -11 81.4446 113.622 3
 1 -6 -11 91.7205 52.5349 2
 -1 -6 10 9306.95 375.26 5
 1 6 -10 9343.51 804.991 2
 1 -6 -10 8999.24 596.625 2
 1 -6 -10 9687.06 836.263 3
 1 -6 -9 172.937 96.2381 3
 -1 -6 9 177.516 57.3722 5
 1 -6 -9 88.4866 59.8056 2
 1 6 -9 206.922 58.9786 3
 1 6 -9 193.449 68.907 2
 1 6 -8 1580.09 292.225 2
 1 -6 -8 1446.32 307.014 3
 1 -6 -8 1602.58 211.368 2
 -1 -6 8 1548.96 174.222 5
 1 6 -8 1631.07 146.204 3
 1 6 -7 72.4871 26.1682 3
 1 -6 -7 63.3952 38.8269 3
 1 6 -7 -5.53169 49.237 2
 -1 -6 7 23.0585 33.2307 5
 1 -6 -7 80.7085 46.0859 2
 -1 -6 6 14612.2 595.183 5
 1 -6 -6 14076.7 479.098 2
 1 -6 -6 14492.4 838.504 3
 1 6 -6 14701.4 785.646 2
 1 -6 -5 88289.8 1938.74 3
 1 6 -5 83974.3 1745.21 2
 1 -6 -5 85111.1 956.45 2
 -1 -6 5 85893.6 1522.96 5
 1 6 -4 57715.9 663.881 3
 -1 -6 4 61259.6 1331.45 5
 1 6 -4 59840.1 1349.23 2
 1 -6 -4 62331.4 1520.8 3
 1 6 -3 15787.8 418.894 3
 -1 -6 3 15938.9 701.014 5
 1 6 -3 16070.7 632.086 2
 1 6 -2 3865.81 243.148 3
 -1 -6 2 3899.59 249.947 4
 -1 -6 2 3950.01 354.728 5
 1 6 -2 3870.02 277.888 2
 1 6 -1 1057.16 143.429 3
 -1 -6 1 857.415 167.241 5
 1 6 -1 939.157 118.657 2
 1 -6 -1 942.281 97.4916 2
 -1 -6 0 7724.3 515.216 5
 1 -6 0 7597.01 333.181 2
 -1 6 0 7612.28 349.958 2
 1 -6 1 32906.5 791.643 2
 -1 -6 -1 32213.2 992.784 3
 -1 6 -1 30991.5 814.872 2
 1 -6 1 32873.7 678.986 3
 1 -6 2 13596.3 363.166 3
 -1 6 -2 13011.4 585.812 2
 -1 -6 -2 13789.6 698.184 3
 -1 -6 -3 1683.65 260.201 3
 -1 6 -3 1711.96 234.425 2
 1 -6 3 1839.94 217.765 5
 1 6 4 3107.7 165.517 2
 -1 6 -4 2811.94 323.048 2
 -1 -6 -4 3265.02 385.781 3
 1 -6 4 2932.19 261.382 5
 -1 6 -5 9277.2 630.329 2
 -1 -6 -5 9147.45 686.552 3
 1 -6 5 8106.66 417.18 5
 1 6 5 8730.74 334.238 2
 -1 6 -6 2842.7 374.719 2
 -1 -6 -6 2611.93 384.417 3
 1 -6 6 3027.05 226.731 5
 -1 -6 -7 169.007 127.666 3
 -1 -6 -7 131.057 58.5816 2
 -1 6 -7 65.7864 63.552 2
 1 -6 7 114.595 34.8993 5
 -1 -6 -8 9306.68 552.864 2
 -1 6 -8 9197.92 320.123 4
 -1 -6 -8 9223.49 792.756 3
 -1 6 -8 9519.44 774.722 2
 1 -6 8 9300.79 271.234 5
 -1 -6 -9 135.69 77.6089 2
 -1 6 -9 108.871 109.099 2
 -1 -6 -9 39.4448 85.0639 3
 -1 -6 -10 -18.1248 110.319 3
 -1 -6 -10 -7.95262 41.1425 2
 -1 6 -10 45.7987 68.5714 2
 1 -6 11 2300.5 312.535 1
 -1 -6 -11 1570.79 374.775 3
 -1 6 -11 2676.06 469.341 2
 -1 -6 -11 2321.14 345.191 2
 -1 -6 -12 157.429 94.2509 2
 -1 -6 -12 122.036 94.5573 3
 -1 6 -12 397.915 200.325 2
 1 -6 12 169.676 85.943 1
 -1 6 -13 -153.033 143.343 2
 -1 -6 -13 -98.5795 70.5818 3
 -1 -6 -14 922.455 311.8 3
 -1 6 -14 312.887 163.965 2
 -1 6 -15 -180.417 153.05 2
 -1 6 -16 -95.3782 120.394 2
 1 -7 -17 1213.5 408.707 3
 1 -7 -16 33.6934 67.36 3
 1 7 -16 -206.233 166.244 2
 1 -7 -15 215.193 97.8319 3
 1 7 -15 722.09 278.66 2
 1 -7 -14 -129.84 149.337 3
 1 7 -14 316.975 213.495 2
 1 7 -13 2847.38 512.862 2
 1 -7 -13 3344.34 574.808 3
 1 7 -12 81.7482 111.248 2
 1 -7 -12 -156.021 127.893 3
 1 -7 -11 617.214 239.723 3
 -1 -7 11 718.216 149.763 1
 1 -7 -11 737.321 177.65 2
 1 7 -11 1048.82 279.936 2
 -1 -7 10 175.322 56.0439 5
 1 7 -10 206.915 159.919 2
 1 -7 -10 118.782 69.3305 2
 1 -7 -10 454.241 212.557 3
 1 -7 -9 14335.1 654.414 2
 -1 -7 9 14188.9 546.438 5
 1 7 -9 13242.1 922.703 2
 -1 -7 8 160.881 62.1265 5
 1 -7 -8 80.9775 33.0325 2
 1 7 -8 173.522 115.263 2
 1 -7 -8 18.5944 74.8585 3
 -1 -7 7 102.178 50.3026 5
 1 -7 -7 93.0767 38.5695 2
 1 7 -7 110.229 41.1231 2
 1 -7 -7 96.5442 57.3209 3
 1 7 -6 813.31 184.331 2
 1 -7 -6 784.45 100.417 2
 1 -7 -6 980.775 232.611 3
 -1 -7 6 863.281 156.919 5
 -1 -7 5 50412.5 1272.12 5
 1 -7 -5 51915.5 1569.08 3
 1 7 -5 51477.7 1407.75 2
 1 -7 -5 48495.9 596.696 2
 1 7 -4 1161.4 98.254 3
 1 -7 -4 1291.12 232.928 3
 1 7 -4 1105.59 195.544 2
 -1 -7 4 1065.78 188.918 5
 1 7 -3 9391.13 508.717 2
 1 -7 -3 9492.09 582.231 3
 -1 -7 3 10115.3 604.309 5
 -1 -7 3 9255.29 351.622 4
 1 7 -3 8867.13 338.524 3
 -1 -7 2 1751.6 256.741 5
 1 -7 -2 1926.96 248.216 3
 1 7 -2 1637.04 167.778 3
 1 7 -2 2039.88 215.895 2
 -1 -7 2 1589.68 177.224 4
 1 -7 -2 1605.32 94.482 2
 1 7 -1 40634.4 940.179 3
 -1 -7 1 41804.8 1277.68 5
 1 7 -1 40806.3 843.588 2
 1 -7 -1 40071.5 670.158 2
 1 -7 -1 41544.5 1050.05 3
 -1 7 0 8121.2 382.765 2
 1 -7 0 8623.1 435.448 3
 1 -7 0 8534.07 366.65 2
 -1 -7 0 8491.03 584.826 5
 1 7 0 8117.44 324.644 2
 -1 -7 -1 18563 801.998 3
 1 7 1 18937.4 382.806 2
 -1 7 -1 19142.8 673.296 2
 1 -7 1 18516.3 569.364 3
 -1 -7 -2 105.753 42.1571 3
 -1 7 -2 35.0441 24.3136 2
 1 -7 2 71.6554 29.2182 3
 1 -7 3 466.02 119.27 5
 -1 7 -3 537.614 144.68 2
 -1 -7 -3 696.802 183.607 3
 -1 -7 -4 41.0864 99.9094 3
 1 -7 4 -47.0541 59.5325 5
 -1 7 -4 107.119 87.0485 2
 1 -7 5 560.449 122.582 5
 -1 -7 -5 578.629 186.682 3
 -1 7 -5 435.58 148.198 2
 -1 7 -6 7064.31 606.076 2
 -1 -7 -6 7215.26 667.998 3
 1 -7 6 7022.87 406.865 5
 -1 -7 -7 1473.41 309.884 3
 1 -7 7 1591.08 175.278 5
 -1 7 -7 1638.79 316.058 2
 -1 -7 -8 2375.37 415.235 3
 1 -7 8 2635.11 188.082 5
 -1 7 -8 3055.42 447.036 2
 -1 -7 -9 19.3109 44.997 2
 -1 -7 -9 -80.0867 136.434 3
 -1 7 -9 -65.338 77.9016 2
 -1 -7 -10 43.0083 36.1519 2
 -1 -7 -10 -8.06659 94.1504 3
 -1 7 -10 70.7687 71.2696 2
 -1 7 -11 175.515 76.3354 2
 -1 -7 -11 38.4135 61.2192 3
 -1 -7 -11 211.486 110.394 2
 -1 7 -12 -77.7461 114.931 2
 1 -7 12 14.6153 31.4264 1
 -1 -7 -13 101.003 79.2085 3
 -1 7 -13 257.454 193.501 2
 -1 -7 -14 271.379 145.87 3
 -1 7 -14 364.267 184.703 2
 -1 7 -15 133.687 156.927 2
 1 -8 -17 31.8896 84.269 3
 1 8 -16 523.086 248.635 2
 1 -8 -16 1071.34 363.548 3
 1 8 -15 35.1661 66.8727 2
 1 -8 -15 63.0723 111.885 3
 1 -8 -14 313.709 186.413 3
 1 8 -14 613.683 262.471 2
 1 8 -13 434.122 220.851 2
 1 -8 -13 205.912 153.876 3
 1 -8 -12 1570.86 400.902 3
 1 8 -12 1282.57 335.497 2
 1 8 -11 2165.17 412.215 2
 1 -8 -11 2378.82 458.34 3
 1 -8 -10 235.31 90.6638 2
 1 8 -10 78.9601 74.175 2
 1 -8 -10 2.54397 72.8497 3
 -1 -8 9 371.406 100.208 5
 1 -8 -9 350.858 96.4246 2
 1 8 -9 266.26 111.499 2
 1 -8 -9 408.282 183.531 3
 -1 -8 8 834.94 150.349 5
 1 -8 -8 1370.41 309.232 3
 1 -8 -8 840.249 134.13 2
 1 8 -8 1076.15 242.583 2
 -1 -8 7 83.2892 49.8948 5
 1 -8 -7 72.1015 102.436 3
 1 8 -7 58.667 60.6646 2
 1 -8 -7 81.3313 36.7223 2
 1 -8 -6 3381.33 446.31 3
 1 -8 -6 3602.4 167.662 2
 1 8 -6 3883.95 433.027 2
 -1 -8 6 3664.65 360.155 5
 1 8 -5 1584.53 258.328 2
 -1 -8 5 1596.04 244.466 5
 1 -8 -5 1194.05 250.878 3
 -1 -8 4 15947.7 804.584 5
 1 8 -4 15799.8 745.912 2
 1 -8 -4 16949.5 880.569 3
 1 -8 -3 221.405 96.4747 3
 -1 -8 3 369.822 119.654 5
 -1 -8 3 215.989 61.3896 4
 1 8 -3 194.635 53.6826 3
 1 8 -3 414.23 116.039 2
 -1 -8 2 20543.4 944.077 5
 1 -8 -2 21289.4 872.087 3
 1 8 -2 20601.4 717.005 2
 -1 -8 2 20449.2 695.733 4
 1 8 -2 21128.3 640.603 3
 1 -8 -1 31.5324 28.939 3
 1 8 -1 18.655 16.1963 2
 1 -8 -1 8.69874 7.64771 2
 1 -8 0 3667.52 246.667 2
 1 -8 0 3510.02 305.039 3
 -1 8 0 3769.77 273.956 2
 1 8 0 3337.27 225.675 2
 -1 -8 0 3224.45 385.748 5
 1 8 1 268.979 51.2332 2
 -1 -8 -1 172.097 82.6154 3
 -1 8 -1 63.4576 40.0121 2
 1 -8 1 266.262 75.4015 3
 -1 8 -2 1279.18 202.91 2
 1 -8 2 1214.68 140.117 3
 -1 -8 -2 1067.29 201.045 3
 -1 8 -3 46842.8 1309.4 2
 -1 -8 -3 44016.3 1465.64 3
 1 -8 3 45523 1309 5
 -1 -8 -4 33.0524 69.7649 3
 -1 8 -4 163.843 103.294 2
 1 -8 4 112.202 81.1829 5
 -1 8 -5 2801.75 367.274 2
 -1 -8 -5 2701.04 398.757 3
 1 -8 5 2690.77 296.365 5
 -1 8 -6 3135.45 411.175 2
 -1 -8 -6 3016.75 447.394 3
 1 -8 6 2776.5 290.087 5
 -1 8 -7 -73.6145 96.15 2
 1 -8 7 29.3414 29.4615 5
 -1 -8 -7 17.6517 109.272 3
 -1 8 -8 843.992 234.33 2
 -1 -8 -8 660.922 228.733 3
 1 -8 8 716.933 115.922 5
 -1 8 -9 78.6827 84.2849 2
 -1 -8 -9 -49.5126 107.967 3
 -1 8 -10 3188.02 512.662 2
 -1 -8 -10 3477.94 556.386 3
 -1 8 -11 3017.1 523.104 2
 -1 -8 -11 2488.23 493.244 3
 -1 8 -12 330.27 192.093 2
 -1 -8 -12 145.755 74.8977 3
 -1 8 -13 167.108 77.3343 2
 -1 -8 -13 435.938 213.646 3
 -1 8 -14 529.424 221.157 2
 -1 -8 -14 772.127 305.063 3
 -1 8 -15 149.504 143.969 2
 1 -9 -16 -32.1007 85.3486 3
 1 9 -15 170.601 142.945 2
 1 -9 -15 -187.33 167.023 3
 1 -9 -14 1825.71 472.146 3
 1 9 -14 1392.28 387.423 2
 1 -9 -13 318.563 188.414 3
 1 9 -13 325.272 167.84 2
 1 9 -12 1217 354.589 2
 1 -9 -12 1112.97 342.348 3
 1 9 -11 2430.78 448.389 2
 1 -9 -11 1876.87 425.879 3
 1 -9 -10 257.847 145.455 3
 1 9 -10 439.836 136.036 2
 1 9 -9 1594.96 339.58 2
 1 -9 -9 1553.83 350.599 3
 -1 -9 9 1641.32 224.194 5
 1 -9 -8 2490.35 191.057 2
 1 9 -8 1935.81 349.843 2
 1 -9 -8 2512.64 441.663 3
 -1 -9 8 2560.09 296.309 5
 -1 -9 7 2448.82 305.977 5
 1 -9 -7 1954.83 372.176 3
 1 9 -7 2528.63 382.162 2
 1 -9 -6 1222.37 279.103 3
 -1 -9 6 877.13 191.23 5
 1 9 -6 1014.24 222.224 2
 1 9 -5 5189.46 480.143 2
 1 -9 -5 4159.08 484.322 3
 -1 -9 5 4695.34 454.286 5
 1 9 -4 1074.55 203.502 2
 -1 -9 4 1267.83 244.539 5
 1 -9 -4 1590.36 279.035 3
 1 -9 -3 9477.65 649.672 3
 1 9 -3 8439.65 529.91 2
 -1 -9 3 8668 418.677 4
 -1 -9 3 9339.07 662.005 5
 -1 -9 2 7328.54 595.14 5
 1 9 -2 7638.19 458.694 2
 1 -9 -2 8157.63 574.907 3
 1 -9 -1 4173.13 386.009 3
 -1 -9 1 4383.4 475.976 5
 1 9 -1 4373.1 311.294 2
 1 9 0 421.917 88.2093 2
 1 -9 0 343.054 101.023 3
 -1 9 0 370.997 89.2102 2
 -1 -9 0 346.013 133.495 5
 -1 9 -1 2183.45 247.429 2
 1 9 1 2259.74 158.729 2
 1 -9 1 2299.5 246.204 3
 -1 -9 -1 1959.32 286.42 3
 1 -9 2 450.719 95.8668 3
 -1 -9 -2 360.65 120.846 3
 -1 9 -2 504.577 133.292 2
 -1 9 -3 20104.9 891.365 2
 1 -9 3 20012.9 930.215 5
 -1 -9 -4 5864.89 590.395 3
 -1 9 -4 6060.28 520.372 2
 1 -9 4 6247.96 507.479 5
 1 -9 5 1549.3 244.936 5
 -1 9 -5 1935.7 313.903 2
 -1 -9 -5 1927.95 351.097 3
 -1 -9 -6 2889.45 450.782 3
 1 -9 6 3396.23 351.117 5
 -1 9 -6 3428.77 444.529 2
 -1 -9 -7 286.045 159.765 3
 1 -9 7 349.055 103.585 5
 -1 9 -7 408.864 156.786 2
 -1 -9 -8 2242.86 423.589 3
 1 -9 8 2530.65 256.074 5
 -1 9 -8 2051.35 388.547 2
 -1 -9 -9 1347.8 332.011 3
 -1 9 -9 1395 328.657 2
 -1 9 -10 666.97 246.328 2
 -1 -9 -10 485.384 213.977 3
 -1 -9 -11 -62.91 153.848 3
 -1 9 -11 42.2542 102.598 2
 -1 9 -12 389.166 228.738 2
 -1 -9 -12 128.946 115.35 3
 -1 -9 -13 -111.789 163.817 3
 -1 9 -13 444.443 262.477 2
 -1 -9 -14 717.916 289.013 3
 -1 9 -14 364.15 197.074 2
 -1 9 -15 791.819 315.877 2
 1 10 -15 271.824 189.515 2
 1 -10 -15 188.829 157.766 3
 1 -10 -14 51.2189 72.8165 3
 1 10 -14 -222.419 165.317 2
 1 -10 -13 262.046 150.321 3
 1 10 -13 152.719 123.745 2
 1 -10 -12 -56.5581 158.097 3
 1 10 -12 505.299 223.367 2
 1 10 -11 950.276 275.436 2
 1 -10 -11 1198.37 357.587 3
 1 -10 -10 340.033 207.209 3
 1 10 -10 262.829 123.331 2
 -1 -10 9 708.436 158.896 5
 1 10 -9 820.401 252.412 2
 1 -10 -9 629.231 245.828 3
 1 10 -8 761.028 220.207 2
 1 -10 -8 774.047 246.404 3
 -1 -10 8 476.896 139.683 5
 -1 -10 7 9497.92 649.578 5
 1 10 -7 8477.3 707.778 2
 1 -10 -7 9224.3 829.443 3
 -1 -10 6 3136.22 384.094 5
 1 -10 -6 2322.22 388.163 3
 1 10 -6 2603.41 371.886 2
 -1 -10 5 3180.65 401.464 5
 1 -10 -5 3027.3 431.923 3
 1 10 -5 3659.15 417.141 2
 1 10 -4 3261.49 375.718 2
 -1 -10 4 3494.23 424.106 5
 1 -10 -4 3602.31 453.163 3
 1 -10 -3 3188.46 399.693 3
 1 10 -3 3053.61 329.754 2
 -1 -10 3 3400.15 290.975 4
 -1 -10 3 3600.73 438.294 5
 1 10 -2 8224.31 502.045 2
 1 -10 -2 8319.91 609.86 3
 -1 -10 2 8026.45 661.216 5
 1 -10 -1 512.933 144.877 3
 -1 -10 1 231.587 117.781 5
 1 10 -1 315.461 83.5952 2
 1 -10 0 1199.97 205.661 3
 -1 -10 0 1197.46 256.809 5
 1 10 0 1100.93 142.791 2
 -1 10 0 1009.08 149.973 2
 -1 -10 -1 1764.81 340.146 5
 -1 -10 -1 1513.35 265.125 3
 -1 10 -1 1411.2 208.728 2
 1 -10 1 1597.77 217.705 3
 1 10 1 1425.88 134.704 2
 -1 10 -2 46.078 51.8883 2
 -1 -10 -2 2.38522 60.4317 3
 1 -10 2 -19.0159 43.3746 3
 -1 -10 -3 1881.36 335.529 3
 1 -10 3 1563.66 277.032 5
 -1 10 -3 1400.48 236.695 2
 -1 -10 -4 11965.2 873.518 3
 1 -10 4 10501.3 702.674 5
 -1 10 -4 10792 717.562 2
 -1 10 -5 10851 773.161 2
 1 -10 5 10602 690.334 5
 -1 -10 -5 10016 826.024 3
 -1 10 -6 415.612 172.104 2
 1 -10 6 218.895 91.8421 5
 -1 -10 -6 240.104 94.9488 3
 1 -10 7 1093.3 201.838 5
 -1 10 -7 987.281 264.964 2
 -1 -10 -7 839.548 270.236 3
 -1 10 -8 974.909 255.473 2
 -1 -10 -8 900.077 283.167 3
 1 -10 8 967.145 176.004 5
 -1 -10 -9 873.781 284.799 3
 -1 10 -9 1210.76 317.51 2
 -1 -10 -10 -10.0009 151.458 3
 -1 10 -10 74.7367 99.0056 2
 -1 10 -11 9.4461 131.824 2
 -1 -10 -11 113.717 142.894 3
 -1 10 -12 -5.78336 104.591 2
 -1 -10 -12 718.23 292.155 3
 -1 10 -13 231.212 139.554 2
 -1 -10 -13 38.2606 72.4613 3
 -1 10 -14 930.297 334.179 2
 1 11 -15 70.5352 130.546 2
 1 -11 -15 -189.144 171.397 3
 1 -11 -14 -155.255 152.8 3
 1 11 -14 88.5907 142.352 2
 1 11 -13 293.574 174.874 2
 1 -11 -13 26.9233 97.3703 3
 1 -11 -12 767.463 269.531 3
 1 11 -12 596.177 270.579 2
 1 -11 -11 1230.37 364.385 3
 1 11 -11 1458.69 362.986 2
 1 -11 -10 1565.06 407.693 3
 1 11 -10 1549.88 358.868 2
 1 11 -9 759.599 240.325 2
 -1 -11 9 622.398 158.722 5
 1 -11 -9 615.346 222.251 3
 -1 -11 8 8614.18 630.665 5
 1 11 -8 8781.64 784.323 2
 1 -11 -8 6632.23 752.556 3
 1 -11 -7 310.609 165.829 3
 1 11 -7 652.97 218.74 2
 -1 -11 7 753.853 195.156 5
 1 11 -6 21356.2 1098.29 2
 1 -11 -6 21855.1 1271.95 3
 -1 -11 6 22440.5 1095.36 5
 1 11 -5 545.908 160.987 2
 -1 -11 5 292.545 134.262 5
 1 -11 -5 460.977 219.806 3
 1 -11 -4 3126.07 433.038 3
 1 11 -4 3249.46 380.238 2
 -1 -11 4 2951.96 419.62 5
 -1 -11 4 3071.89 237.03 4
 -1 -11 3 4513.39 518.208 5
 1 -11 -3 5077.67 537.449 3
 1 11 -3 4614.64 425.038 2
 -1 -11 3 4507.47 356.415 4
 1 -11 -2 2790.87 372.708 3
 1 11 -2 2739.37 300.059 2
 -1 -11 2 2565.27 393.197 5
 1 11 -1 1959.51 231.397 2
 1 -11 -1 1676.58 275.419 3
 -1 -11 1 2010.07 366.046 5
 -1 11 0 4085.73 321.403 2
 1 11 0 4428.16 306.42 2
 1 -11 0 3969.16 397.16 3
 -1 -11 0 4421.61 540.573 5
 -1 11 -1 30.5696 33.1438 2
 1 11 1 -29.485 21.7611 2
 1 -11 1 13.8244 27.9788 3
 -1 -11 -1 73.6144 89.3323 5
 -1 -11 -2 1502.53 293.639 3
 1 -11 2 1605.34 212.271 3
 1 -11 2 1805.74 322.562 5
 -1 11 -2 1714.13 258.442 2
 -1 11 -3 9698.02 664.083 2
 -1 -11 -3 9258.06 753.544 3
 1 -11 3 9976.77 750.629 5
 1 -11 4 5223.51 530.593 5
 -1 -11 -4 5618.69 613.211 3
 1 -11 4 4906.66 194.912 4
 -1 11 -4 6078.82 553.782 2
 -1 -11 -5 6.99093 65.9931 3
 1 -11 5 -16.0587 37.4221 5
 -1 11 -5 -16.4519 68.049 2
 -1 -11 -6 7970.04 795.167 3
 1 -11 6 8472.75 642.011 5
 -1 11 -6 9421.58 778.152 2
 1 -11 7 2382.73 320.722 5
 -1 11 -7 2086.3 386.978 2
 -1 -11 -7 2270.24 439.114 3
 -1 11 -8 2329.65 429.211 2
 -1 -11 -8 2127.46 442.189 3
 -1 11 -9 1006.33 303.688 2
 -1 -11 -9 591.687 246.734 3
 -1 11 -10 537.517 194.443 2
 -1 -11 -10 718.959 280.744 3
 -1 -11 -11 671.193 258.237 3
 -1 11 -11 457.872 212.85 2
 -1 11 -12 346.396 190.146 2
 -1 -11 -12 978.432 332.355 3
 -1 -11 -13 57.7577 96.7185 3
 -1 11 -13 4.68021 66.2888 2
 -1 11 -14 260.958 202.955 2
 1 12 -14 52.6213 150.945 2
 1 -12 -14 61.2074 99.3973 3
 1 12 -13 181.054 177.566 2
 1 -12 -13 80.1203 127.636 3
 1 12 -12 100.767 115.531 2
 1 -12 -12 309.048 195.41 3
 1 -12 -11 2755.83 563.943 3
 1 12 -11 1951.84 423.152 2
 1 -12 -10 -5.87814 84.1571 3
 1 12 -10 141.537 74.9862 2
 1 12 -9 1811.2 375.607 2
 1 -12 -9 1389.23 367.032 3
 1 -12 -8 2011.47 422.093 3
 -1 -12 8 1872.12 321.378 5
 1 12 -8 2472.86 422.983 2
 1 12 -7 2351.76 398.498 2
 -1 -12 7 2753.22 396.309 5
 1 -12 -6 11216.8 940.07 3
 -1 -12 6 11735.3 834.989 5
 1 12 -6 11571.7 829.632 2
 1 -12 -5 1285.22 296.009 3
 -1 -12 5 1708.13 331.189 5
 1 12 -5 1553.66 293.989 2
 1 12 -4 80.669 77.0882 2
 -1 -12 4 42.8454 39.4162 4
 1 -12 -4 46.694 87.5041 3
 -1 -12 4 191.671 134.022 5
 1 12 -3 13754 759.359 2
 -1 -12 3 13141.1 638.944 4
 -1 -12 3 12462.3 911.938 5
 1 -12 -3 13093.6 891.609 3
 1 12 -2 -53.9578 51.2784 2
 -1 -12 2 -29.8494 84.0996 5
 1 -12 -2 30.8293 72.8944 3
 -1 -12 2 43.4934 30.7714 4
 1 -12 -1 1189.6 237.216 3
 1 12 -1 1725.42 222.752 2
 -1 -12 1 1573.81 328.92 5
 1 -12 0 53.9669 73.5998 3
 -1 12 0 11.1738 32.4258 2
 1 12 0 15.9109 26.903 2
 -1 -12 0 141.736 105.722 5
 1 -12 1 5735.28 467.406 3
 1 12 1 5046.12 271.332 2
 -1 12 -1 4891.53 413.776 2
 -1 -12 -1 6389.21 701.662 5
 1 -12 2 -63.4626 116.843 5
 -1 -12 -2 -15.0537 51.2917 3
 -1 12 -2 68.5836 57.1752 2
 -1 -12 -2 -83.6637 139.283 5
 1 -12 3 1153.6 259.336 5
 -1 12 -3 1190.86 234.732 2
 -1 -12 -3 1112.07 275.292 3
 -1 12 -4 1282.83 257.065 2
 1 -12 4 2174.88 357.196 5
 -1 -12 -4 2092.61 385.061 3
 -1 -12 -5 1656.64 368.252 3
 1 -12 5 1651.76 306.615 5
 -1 12 -5 1785.95 326.639 2
 1 -12 6 184.083 92.1785 5
 -1 -12 -6 194.924 89.2782 3
 -1 12 -6 26.4326 75.2994 2
 -1 -12 -7 3461.16 565.193 3
 -1 12 -7 2579.07 427.142 2
 1 -12 7 2850.62 378.631 5
 -1 -12 -8 719.297 282.718 3
 -1 12 -8 916.066 276.733 2
 -1 -12 -9 1949.58 441.786 3
 -1 12 -9 2463.96 469.71 2
 -1 -12 -10 171.99 132.312 3
 -1 12 -10 -344.534 186.486 2
 -1 -12 -11 126.265 156.58 3
 -1 12 -11 -10.5663 74.1584 2
 -1 12 -12 -26.2705 125.707 2
 -1 -12 -12 98.3292 81.5617 5
 -1 12 -13 904.564 325.803 2
 1 13 -14 331.787 233.376 2
 1 -13 -13 99.3119 133.611 3
 1 13 -13 39.2368 89.1349 2
 1 13 -12 1989.01 462.209 2
 1 -13 -12 2815.53 600.507 3
 1 13 -11 13.2942 71.34 2
 1 -13 -11 426.281 236.302 3
 1 13 -10 -43.4263 126.489 2
 1 -13 -10 -40.8724 170.235 3
 1 13 -9 668.272 234.708 2
 1 -13 -9 371.488 187.984 3
 1 -13 -8 45.9361 121.997 3
 1 13 -8 223.37 134.247 2
 -1 -13 8 287.093 130.736 5
 -1 -13 7 1301.82 285.827 5
 1 -13 -7 612.806 240.876 3
 1 13 -7 1047.69 270.657 2
 1 -13 -6 3605.72 552.998 3
 -1 -13 6 2761.05 427.223 5
 1 13 -6 3125.33 448.735 2
 1 -13 -5 859.567 231.022 3
 1 13 -5 1441.95 289.483 2
 -1 -13 5 1004.23 277.415 5
 1 13 -4 1462.31 279.248 2
 1 -13 -4 996.03 265.746 3
 -1 -13 4 1164.94 292.737 5
 -1 -13 3 -3.45612 34.4088 4
 -1 -13 3 23.1127 110.354 5
 1 13 -3 -38.7832 56.5475 2
 1 -13 -3 10.8661 59.9947 3
 -1 -13 2 12187.1 961.353 5
 1 13 -2 12544.1 689.979 2
 1 -13 -2 12754.3 870.173 3
 -1 -13 2 12443.2 725.079 4
 -1 -13 1 -44.893 84.8856 5
 1 -13 -1 76.68 52.5432 3
 1 13 -1 89.8859 41.2141 2
 1 13 0 87.3008 34.1685 2
 -1 -13 0 -41.902 107.435 5
 1 -13 0 -5.78917 44.1042 3
 1 -13 1 123.581 62.9881 3
 1 -13 1 99.0415 96.0238 5
 -1 13 -1 247.81 96.538 2
 -1 -13 -1 61.2659 98.0219 5
 1 -13 2 3149.07 471.01 5
 -1 13 -2 2411.22 323.912 2
 -1 -13 -2 2543.36 469.33 5
 -1 13 -3 80.6234 77.0971 2
 1 -13 3 101.353 93.3347 5
 -1 -13 -3 67.17 92.5353 3
 -1 -13 -3 117.322 78.7718 5
 -1 -13 -4 4226.05 580.181 3
 -1 13 -4 4941.23 536.85 2
 1 -13 4 4418.28 552.156 5
 -1 13 -5 8.73793 96.2498 2
 -1 -13 -5 -94.6465 128.083 3
 1 -13 5 17.8305 45.0889 5
 -1 13 -6 1460.99 326.387 2
 1 -13 6 1484.83 309.207 5
 -1 -13 -6 1175.69 327.026 3
 -1 -13 -7 1141.78 336.769 3
 -1 13 -7 711.441 231.399 2
 1 -13 7 818.23 223.934 5
 -1 13 -8 2239.67 440.682 2
 -1 -13 -8 2186.73 471.067 3
 -1 -13 -9 26.9816 108.234 3
 -1 13 -9 52.3664 70.4558 2
 -1 -13 -10 3072.14 596.079 3
 -1 13 -10 1385.65 362.726 2
 -1 13 -11 401.607 211.657 2
 -1 -13 -11 207.432 147.246 3
 -1 -13 -11 175.69 132.416 5
 -1 -13 -12 1316.06 425.24 3
 -1 13 -12 840.086 313.187 2
 -1 -13 -12 803.03 306.63 5
 -1 13 -13 -19.3912 105.571 2
 -1 -13 -13 -309.527 192.847 5
 1 -14 -13 -302.11 214.791 3
 1 14 -13 -74.7589 107.556 2
 1 14 -12 321.998 223.606 2
 1 -14 -12 166.106 120.866 3
 1 -14 -11 -30.5074 112.783 3
 1 14 -11 321.867 185.174 2
 1 -14 -10 35.0917 145.553 3
 1 14 -10 302.5 175.315 2
 1 14 -9 231.042 163.585 2
 1 -14 -9 -90.42 124.586 3
 1 -14 -8 1620.18 409.466 3
 1 14 -8 1285.68 322.008 2
 -1 -14 8 1619.39 325.583 5
 -1 -14 7 9794.17 822.631 5
 1 14 -7 8827.27 807.879 2
 1 -14 -7 8062.62 879.308 3
 1 14 -6 439.238 172.104 2
 -1 -14 6 422.609 179.976 5
 1 -14 -6 862.13 268.168 3
 1 14 -5 759.43 219.234 2
 -1 -14 5 995.326 273.314 5
 1 -14 -5 478.607 221.205 3
 1 14 -4 1807.35 306.857 2
 -1 -14 4 1938.61 390.381 5
 1 -14 -4 1499.52 343.925 3
 1 -14 -3 4359.13 547.866 3
 -1 -14 3 5861.95 689.083 5
 1 14 -3 5342.38 502.09 2
 -1 -14 3 5023.4 430.427 4
 -1 -14 2 1466.48 259.265 4
 1 14 -2 1517.63 247.241 2
 -1 -14 2 1354.33 341.163 5
 1 -14 -2 872.677 231.952 3
 1 14 -1 91.6272 64.0204 2
 1 -14 -1 74.9618 76.2448 3
 -1 -14 1 111.505 124.563 5
 -1 -14 0 3446.75 548.409 5
 1 -14 0 3588.19 440.708 3
 1 -14 1 1551.77 352.034 5
 -1 14 -1 1678.95 254.007 2
 -1 -14 -1 1875.79 406.769 5
 1 -14 2 378.993 194.149 5
 -1 -14 -2 72.7341 79.3058 5
 -1 14 -2 345.424 133.575 2
 -1 -14 -3 -68.6974 131.728 5
 1 -14 3 65.0397 75.8931 5
 -1 14 -3 43.3937 70.1786 2
 -1 14 -4 99.6064 77.1713 2
 -1 -14 -4 -130.759 73.3665 5
 -1 -14 -4 -6.43509 84.0181 3
 1 -14 4 104.025 84.6316 5
 -1 -14 -5 1694.34 395.097 5
 1 -14 5 1515.1 324.39 5
 -1 14 -5 1745.78 335.895 2
 -1 -14 -5 1392.04 366.47 3
 -1 -14 -6 -111.46 135.788 3
 -1 14 -6 19.4089 69.7581 2
 1 -14 6 22.7172 47.0799 5
 -1 -14 -6 230.816 185.729 5
 1 -14 7 57.8146 60.1564 5
 -1 -14 -7 6.71392 139.218 3
 -1 14 -7 195.12 141.51 2
 -1 14 -8 180.763 109.531 2
 -1 -14 -8 641.539 264.766 5
 -1 -14 -8 490.261 244.244 3
 -1 -14 -9 1015.4 353.635 3
 -1 -14 -9 1378.65 402.056 5
 -1 14 -9 1676.66 394.253 2
 -1 14 -10 -30.379 71.2071 2
 -1 -14 -10 435.631 271.036 3
 -1 -14 -10 351.384 221.359 5
 -1 -14 -11 661.447 276.721 5
 -1 14 -11 1109.51 347.718 2
 -1 14 -12 173.292 166.101 2
 -1 -14 -12 47.0504 72.924 5
 -1 -14 -13 1046.52 358.783 5
 1 15 -13 185.229 134.873 2
 1 15 -12 229.95 197.899 2
 1 -15 -12 -27.2251 80.6038 3
 1 15 -11 83.6284 113.688 2
 1 -15 -11 -27.5794 106.799 3
 1 15 -10 233.194 128.839 2
 1 -15 -10 158.71 168.755 3
 1 -15 -9 1217.53 392.032 3
 1 15 -9 1389.75 366.953 2
 -1 -15 8 82.6746 79.3267 5
 1 15 -8 126.972 157.719 2
 1 -15 -8 -31.7801 86.0307 3
 -1 -15 7 278.53 148.69 5
 1 15 -7 33.7705 59.8201 2
 1 -15 -7 280.649 194.08 3
 1 -15 -6 1044.59 307.735 3
 1 15 -6 1264.01 306.733 2
 -1 -15 6 1107.17 289.757 5
 1 -15 -5 1625.45 377.589 3
 1 15 -5 1777.76 334.562 2
 -1 -15 5 2145.36 419.126 5
 1 -15 -4 -30.3874 104.219 3
 -1 -15 4 229.244 165.719 5
 1 15 -4 57.9943 91.8228 2
 1 15 -3 20.1548 50.6041 2
 -1 -15 3 61.8909 71.997 5
 1 -15 -3 -2.59786 76.2712 3
 -1 -15 2 18.8786 35.3103 4
 -1 -15 2 -79.6057 74.3045 5
 1 -15 -2 70.2475 78.8093 3
 1 -15 -1 5213.42 576.935 3
 -1 -15 1 5439.08 703.342 5
 1 -15 0 696.192 198.933 3
 1 -15 0 495.012 201.275 5
 -1 -15 0 1076.03 325.101 5
 -1 -15 -1 833.891 303.661 5
 1 -15 1 961.73 306.411 5
 -1 15 -2 -1.01565 55.9757 2
 1 -15 2 -141.097 116.975 5
 1 -15 3 925.935 278.377 5
 -1 15 -3 988.855 233.122 2
 -1 -15 -3 706.663 269.379 5
 -1 -15 -4 313.452 153.723 5
 -1 15 -4 320.833 165.758 2
 1 -15 4 467.787 218.362 5
 -1 -15 -5 1173.35 350.126 5
 1 -15 5 1250.71 305.514 5
 -1 15 -5 1342.83 308.565 2
 1 -15 6 -131.089 104.196 5
 -1 -15 -6 117.072 118.507 3
 -1 15 -6 -62.2271 52.0718 2
 -1 -15 -6 -39.7678 113.696 5
 -1 -15 -7 759.519 292.033 3
 -1 15 -7 970.506 288.085 2
 -1 -15 -7 781.091 277.74 5
 -1 15 -8 67.6585 87.7396 2
 -1 -15 -8 46.1073 66.7249 3
 -1 15 -9 615.305 244.104 2
 -1 -15 -9 1036.2 358.615 5
 -1 -15 -10 3.07467 124.01 5
 -1 15 -10 144.26 146.751 2
 -1 15 -11 634.638 290.961 2
 -1 -15 -11 136.993 100.845 5
 -1 15 -12 -62.0569 187.544 2
 -1 -15 -12 -52.1148 94.1227 5
 -1 -15 -13 68.0824 146.781 5
 1 16 -12 156.932 149.4 2
 1 -16 -11 1004.65 374.869 3
 1 16 -11 1117.11 349.292 2
 1 16 -10 271.948 148.424 2
 1 -16 -10 375.38 228.286 3
 1 16 -9 -23.3192 74.7011 2
 1 -16 -9 37.2454 165.537 3
 1 16 -8 332.51 179.185 2
 1 -16 -8 416.068 232.338 3
 -1 -16 7 763.456 244.789 5
 1 16 -7 879.682 261.618 2
 1 -16 -6 138.266 77.8073 3
 -1 -16 6 286.111 163.607 5
 1 16 -6 113.212 75.2796 2
 1 16 -5 19.9763 51.2645 2
 1 -16 -5 -28.6239 114.587 3
 -1 -16 5 -72.3249 112.562 5
 1 -16 -4 365.153 201.953 3
 -1 -16 4 65.5668 104.876 5
 -1 -16 3 137.643 149.37 5
 1 -16 -3 279.067 140.269 3
 -1 -16 2 2196.21 457.986 5
 1 -16 -2 2392.49 423.78 3
 -1 -16 1 100.949 101.505 5
 1 -16 -1 52.8181 151.331 5
 1 -16 -1 99.5641 83.6357 3
 1 -16 0 530.068 225.509 5
 -1 -16 0 920.598 300.463 5
 1 -16 1 43.4469 101.92 5
 -1 -16 -1 92.294 145.042 5
 1 -16 2 2043.41 434.222 5
 -1 -16 -2 1789.41 437.8 5
 -1 -16 -3 1062.57 340.199 5
 1 -16 3 1381.31 358.113 5
 -1 -16 -4 558.107 240.694 5
 1 -16 4 649.082 236.103 5
 -1 16 -4 821.336 238.391 2
 -1 16 -5 1373.86 314.622 2
 1 -16 5 1174.87 311.166 5
 -1 -16 -5 870.954 294.979 5
 1 -16 6 700.852 241.471 5
 -1 16 -6 852.494 264.563 2
 -1 -16 -6 833.13 315.149 5
 -1 -16 -7 196.037 178.116 5
 -1 16 -7 484.403 217.736 2
 -1 16 -8 -85.6806 109.824 2
 -1 -16 -8 119.032 129.881 5
 -1 -16 -9 660.408 300.345 5
 -1 16 -9 1200.57 354.075 2
 -1 16 -10 312.246 196.982 2
 -1 -16 -10 -237.454 186.715 5
 -1 16 -11 -20.9497 73.013 2
 -1 -16 -11 -465.161 257.565 5
 -1 -16 -12 -81.4663 119.899 5
 1 17 -12 57.6793 141.946 2
 1 17 -11 -64.5514 105.19 2
 1 -17 -10 311.513 192.503 3
 1 17 -10 48.9204 97.4144 2
 1 17 -9 1347.33 372.31 2
 1 -17 -9 2053.82 524.759 3
 1 -17 -8 353.933 237.378 3
 1 17 -8 350.407 189.437 2
 1 -17 -7 189.591 173.267 3
 -1 -17 7 196.689 133.523 5
 1 17 -7 151.638 69.1214 2
 -1 -17 6 74.4512 77.0377 5
 1 -17 -6 630.24 265.196 3
 -1 -17 5 387.963 206.026 5
 1 -17 -5 1411.79 385.013 3
 1 -17 -4 848.557 283.729 3
 -1 -17 4 947.709 325.824 5
 1 -17 -3 532.857 219.55 3
 -1 -17 3 1437.74 386.446 5
 -1 -17 2 -49.1289 85.2808 5
 1 -17 -2 47.0359 53.9959 3
 1 -17 -2 -40.453 110.258 5
 1 -17 -1 468.444 220.033 5
 -1 -17 1 722.921 265.742 5
 1 -17 0 657.026 280.938 5
 -1 -17 0 927.748 325.179 5
 1 -17 1 6.83411 90.6661 5
 -1 -17 -1 235.037 157.331 5
 1 -17 2 268.763 171.108 5
 -1 -17 -2 -64.1213 192.781 5
 -1 -17 -3 1530.5 432.565 5
 1 -17 3 894.701 293.854 5
 1 -17 4 24.2228 98.2874 5
 -1 -17 -4 -45.2997 141.643 5
 -1 -17 -5 -42.6322 97.6175 5
 1 -17 5 207.889 165.926 5
 -1 -17 -6 29.2414 123.741 5
 -1 17 -6 227.26 155.017 2
 1 -17 6 -120.88 68.3435 5
 -1 17 -7 1030.05 298.27 2
 -1 -17 -7 1196.58 410.032 5
 -1 17 -8 -74.9437 98.5782 2
 -1 -17 -8 -46.7887 72.8206 5
 -1 17 -9 318.858 214.235 2
 -1 -17 -9 87.2487 93.2203 5
 -1 17 -10 0.36003 254.002 2
 -1 -17 -10 365.427 241.05 5
 -1 -17 -11 -3.17615 73.0022 5
 -1 17 -11 192.19 179.919 2
 1 18 -11 0.37939 143.145 2
 1 18 -10 -58.743 93.8356 2
 1 18 -9 113.392 118.859 2
 1 -18 -9 26.5262 115.476 3
 1 -18 -8 384.126 211.725 3
 1 -18 -7 -275.254 189.112 3
 -1 -18 7 98.037 79.8827 5
 1 -18 -6 43.069 78.9014 3
 -1 -18 6 554.104 246.817 5
 1 -18 -5 133.576 140.965 3
 -1 -18 5 560.89 254.833 5
 -1 -18 4 467.146 247.622 5
 1 -18 -4 165.87 121.726 5
 1 -18 -3 -120.779 96.6715 3
 -1 -18 3 160.88 146.823 5
 1 -18 -3 -249.018 187.371 5
 -1 -18 2 -441.245 229.536 5
 1 -18 -2 -22.4028 141.548 5
 -1 -18 1 1348.62 407.731 5
 1 -18 -1 710.056 289.743 5
 1 -18 0 110.069 157.461 5
 -1 -18 0 -112.062 133.859 5
 1 -18 1 298.761 175.715 5
 -1 -18 -1 371.557 242.694 5
 -1 -18 -2 404.597 216.77 5
 1 -18 2 782.963 283.463 5
 1 -18 3 4.01143 64.6552 5
 -1 -18 -3 13.3768 109.325 5
 -1 -18 -4 167.95 149.487 5
 1 -18 4 249.565 162.817 5
 1 -18 5 -4.72193 78.6456 5
 -1 -18 -5 -203.638 173.433 5
 -1 -18 -6 120.762 142.58 5
 -1 -18 -7 382.057 238.717 5
 -1 -18 -8 36.6427 91.8333 5
 -1 -18 -9 175.848 195.69 5
 -1 18 -9 -223.47 161.624 2
 -1 18 -10 241.657 181.772 2
 1 -19 -8 159.019 163.56 3
 1 -19 -7 110.423 123.899 3
 1 -19 -7 -133.533 155.814 5
 1 -19 -6 697.616 305.279 3
 -1 -19 6 546.439 237.423 5
 1 -19 -6 1004.07 391.385 5
 1 -19 -5 902.23 334.184 3
 -1 -19 5 1837.21 447.614 5
 1 -19 -5 1708.35 485.56 5
 1 -19 -4 -93.702 215.612 5
 -1 -19 4 -45.0166 91.5968 5
 -1 -19 3 390.492 207.782 5
 1 -19 -3 337.891 232.262 5
 1 -19 -2 -67.8925 96.2155 5
 -1 -19 2 105.399 114.658 5
 -1 -19 1 1366.73 416.443 5
 1 -19 -1 1468.74 430.772 5
 1 -19 0 19.8705 109.634 5
 -1 -19 0 92.1297 154.045 5
 -1 -19 -1 1051.5 353.305 5
 1 -19 1 576.985 245.724 5
 1 -19 2 100.584 146.333 5
 -1 -19 -2 -30.5373 76.2244 5
 -1 -19 -3 767.084 320.955 5
 1 -19 3 857.206 309.514 5
 1 -19 4 147.781 133.082 5
 -1 -19 -4 -129.441 146.619 5
 1 -19 5 -139.657 132.034 5
 -1 -19 -5 -2.21792 126.618 5
 -1 -19 -6 221.818 194.645 5
 -1 -19 -7 771.876 340.466 5
 -1 -20 6 129.524 141.639 5
 -1 -20 5 -40.9584 114.018 5
 1 -20 -5 -68.9941 124.305 5
 1 -20 -4 617.771 299.962 5
 -1 -20 4 1178.62 386.397 5
 -1 -20 3 280.317 184.705 5
 1 -20 -3 261.024 118.768 5
 1 -20 -2 356.633 214.9 5
 -1 -20 2 413.518 269.452 5
 1 -20 -1 120.95 110.431 5
 -1 -20 1 284.879 208.47 5
 -1 -20 0 1434.57 450.821 5
 1 -20 0 999.44 368.333 5
 -1 -20 -1 439.509 250.101 5
 1 -20 1 592.357 292.592 5
 1 -20 2 461.65 243.639 5
 -1 -20 -2 440.09 296.668 5
 -1 -20 -3 139.062 92.0775 5
 1 -20 3 311.384 221.283 5
 -1 -20 -4 106.256 99.696 5
 1 -20 4 171.084 135.55 5
 -1 -21 5 341.234 206.633 5
 -1 -21 4 79.8647 116.924 5
 -1 -21 3 -85.6578 115.956 5
 -1 -21 2 205.648 153.531 5
 1 -21 -2 525.626 319.619 5
 -1 -21 1 1320.12 429.267 5
 1 -21 -1 1103.63 395.543 5
 -1 -21 0 -61.0411 114.921 5
 1 -21 0 133.396 86.9148 5
 1 -21 1 -82.2234 126.047 5
 -1 -21 -1 249.703 197.496 5
 1 -21 2 442.742 253.469 5
 1 -21 3 325.362 196.209 5
 1 -21 4 25.6501 84.8671 5
 1 -22 3 206.74 184.872 5
 2 0 -19 -212.267 168.296 2
 2 0 -18 1385.55 397.905 2
 2 0 -17 85.976 94.9515 2
 2 0 -16 1831.25 411.811 2
 2 0 -15 -139.614 116.917 2
 2 0 -15 -207.385 130.992 3
 2 0 -14 5790.61 676.444 2
 2 0 -14 6296.25 665.993 3
 2 0 -13 38.055 52.6048 3
 2 0 -13 57.5708 95.3277 2
 2 0 -12 33.7899 60.8516 3
 2 0 -12 -105.459 127.256 2
 2 0 -11 36.5771 75.5909 3
 2 0 -11 -46.5215 95.1124 2
 2 0 -10 6653.93 573.944 2
 2 0 -9 -18.3875 51.2894 2
 2 0 -8 281.825 99.8812 2
 -2 0 8 195.776 59.9426 5
 -2 0 7 -8.89421 22.7021 5
 2 0 -7 -27.9443 57.1622 2
 2 0 -7 -1.7473 13.9701 1
 2 0 -6 12592.3 417.741 1
 -2 0 6 11787.2 421.023 5
 2 0 -5 38.976 27.7712 5
 -2 0 5 11.241 27.4749 5
 2 0 -5 -3.37523 10.4665 1
 -2 0 4 10254.3 343.048 5
 2 0 -4 11292.5 369.595 5
 -2 0 3 2.17315 13.0227 5
 -2 0 2 97889.8 922.675 5
 -2 0 -1 -4.47088 14.4302 5
 -2 0 -1 -21.0228 29.0457 4
 2 0 2 3730.75 180.299 5
 -2 0 -2 4203.69 276.511 4
 -2 0 -2 3729.93 164.992 5
 -2 0 -3 8.98408 11.2488 5
 2 0 3 -4.39697 19.0656 3
 -2 0 -3 -5.74506 22.2191 2
 -2 0 -4 10459 546.845 2
 -2 0 -4 10013.3 296.219 5
 2 0 5 -31.9349 34.2824 1
 -2 0 -5 47.8423 50.4053 2
 -2 0 -5 -41.1947 20.9388 5
 -2 0 -6 2132.23 120.68 5
 -2 0 -6 2012.07 149.54 5
 2 0 6 2245.92 258.3 1
 -2 0 -6 2002.7 281.758 2
 2 0 7 -22.3562 49.3059 1
 -2 0 -7 43.3391 59.5123 2
 -2 0 -7 13.6041 11.3682 5
 -2 0 -7 9.88077 10.6214 5
 -2 0 -8 4838.6 189.672 5
 2 0 8 4857.17 427.254 1
 -2 0 -8 5698.68 537.094 2
 -2 0 -8 5229.35 261.936 5
 -2 0 -9 -36.4807 38.4952 2
 -2 0 -9 -25.3344 19.2438 5
 2 0 9 -31.2703 46.1924 1
 2 0 10 3524.15 397.217 1
 -2 0 -10 3344.8 459.647 2
 2 0 11 1.92543 52.3512 1
 -2 0 -11 -213.621 129.615 2
 -2 0 -12 154.742 103.504 2
 2 0 12 102.114 45.5743 1
 -2 0 -13 76.961 121.101 2
 2 0 13 11.3805 56.6794 1
 -2 0 -14 553.5 225.41 2
 2 0 14 746.434 206.298 1
 -2 0 -15 50.5533 90.3002 2
 -2 0 -16 64.1242 105.131 2
 -2 0 -17 110.335 133.646 2
 2 1 -18 196.958 145.85 2
 2 -1 -18 609.745 268.416 2
 2 -1 -17 1623.37 403.545 2
 2 1 -17 1658.78 419.96 2
 2 1 -16 -86.8272 54.2397 2
 2 -1 -16 32.297 37.6041 3
 2 -1 -16 45.7234 49.0952 2
 2 -1 -15 939.102 283.553 2
 2 1 -15 1515.95 369.933 2
 2 -1 -15 1369.6 331.997 3
 2 1 -14 89.8361 73.3173 3
 2 -1 -14 -50.3376 112.913 3
 2 1 -14 128.885 150.673 2
 2 -1 -14 -40.4724 87.4972 2
 2 1 -13 3567.65 461.454 3
 2 1 -13 3411.48 497.165 2
 2 -1 -13 3431.74 487.447 3
 2 -1 -13 3237.53 475.356 2
 2 -1 -12 2229.54 366.773 3
 2 1 -12 1946.06 354.603 2
 2 1 -12 2115.31 339.127 3
 2 -1 -12 2471.09 381.557 2
 2 -1 -11 -13.6904 87.2519 2
 2 1 -11 200.492 115.841 3
 2 1 -11 102.668 47.7439 2
 2 -1 -10 1125.98 230.942 2
 2 1 -10 641.88 183.503 2
 2 -1 -10 723.325 181.292 3
 2 -1 -9 18798 871.175 2
 2 1 -9 17949.2 902.708 2
 -2 -1 9 18850.4 600.815 5
 2 1 -8 1203.91 211.617 2
 -2 -1 8 1359.71 154.092 5
 2 -1 -8 1472.26 226.049 2
 2 1 -7 803.635 168.3 2
 2 -1 -7 1093.49 179.657 2
 -2 -1 7 923.883 118.146 5
 2 1 -6 4079.5 256.328 5
 -2 -1 6 3947.03 230.64 5
 -2 1 6 3800.56 256.326 5
 2 -1 -6 3757.17 243.658 1
 2 -1 -5 6092.57 278.253 1
 -2 -1 5 6338.75 284.627 5
 2 1 -5 6314.17 305.556 5
 -2 1 5 6193.92 310.645 5
 -2 1 4 18716.8 493.56 5
 -2 -1 4 18231.6 461.971 5
 2 1 -4 18957.8 501.664 5
 -2 -1 3 13041.3 379.568 5
 -2 1 3 13580.4 388.046 5
 -2 1 2 58112 732.568 5
 -2 -1 2 58904.2 797.014 5
 -2 -1 -1 18349.3 465.633 5
 -2 1 -1 18625.8 296.031 5
 -2 -1 -1 18398.9 564.83 4
 -2 -1 -2 1958.14 158.37 5
 -2 1 -2 2055.04 174.52 4
 2 1 2 1996.14 160.818 5
 -2 1 -2 2179.45 211.095 2
 -2 -1 -3 19825.2 519.566 5
 -2 1 -3 18886.6 694.274 2
 -2 -1 -3 19967.7 653.343 2
 2 -1 3 18881.3 594.864 3
 -2 1 -3 19369.9 602.665 4
 -2 -1 -4 6300.23 305.89 5
 -2 1 -4 6350.89 441.138 2
 -2 -1 -4 6391.13 411.963 2
 2 -1 4 6309.27 379.151 3
 -2 -1 -5 4166.09 259.348 5
 -2 1 -5 4026.08 375.798 2
 -2 -1 -5 3710.9 344.027 2
 2 1 5 4209.91 337.355 1
 -2 -1 -6 10888.5 440.336 5
 -2 1 -6 10630.1 664.098 2
 2 -1 6 11785.4 592.22 1
 2 1 6 11692.1 601.723 1
 -2 -1 -6 10599.2 623.896 2
 2 -1 7 3534.41 340.013 1
 -2 1 -7 4194.9 446.121 2
 2 1 7 3602.37 354.956 1
 -2 -1 -7 3072.09 241.386 5
 -2 -1 -7 2836.04 348.234 2
 -2 1 -8 454.619 155.665 2
 -2 -1 -8 538.433 80.9111 5
 -2 -1 -8 348.738 139.184 2
 2 -1 8 641.212 155.173 1
 -2 -1 -8 583.326 110.029 5
 2 1 8 879.273 182.679 1
 -2 1 -9 710.262 202.652 2
 2 1 9 806.297 179.486 1
 -2 -1 -9 850.826 216.17 2
 -2 -1 -9 977.061 141.792 5
 2 -1 9 884.817 195.15 1
 -2 -1 -10 1471.16 305.361 2
 2 -1 10 1899.09 293.86 1
 2 1 10 1814.6 287.894 1
 -2 1 -10 1306.77 291.41 2
 -2 -1 -11 1898.63 361.112 2
 -2 1 -11 2066.66 386.105 2
 2 -1 11 1554.4 272.474 1
 2 1 11 1966.13 307.619 1
 -2 1 -12 2059.66 404.299 2
 2 1 12 1849.77 310.305 1
 2 -1 12 1601.34 284.908 1
 -2 -1 -12 1461.24 327.786 2
 -2 1 -13 3942.24 586.571 2
 2 -1 13 4729.89 508.192 1
 2 1 13 4890.45 520.078 1
 -2 -1 -13 5724.21 684.881 2
 -2 1 -14 427.551 192.316 2
 -2 -1 -14 800.596 266.004 2
 2 -1 14 519.033 169.679 1
 -2 -1 -15 -34.4616 48.0301 2
 -2 1 -15 33.3257 75.0994 2
 -2 1 -16 145.87 133.662 2
 -2 -1 -16 96.4741 122.719 2
 -2 1 -17 924.335 344.165 2
 -2 -1 -17 881.795 315.284 2
 2 2 -18 618.264 271.437 2
 2 -2 -18 864.877 300.538 2
 2 2 -17 88.8663 106.79 2
 2 -2 -17 336.418 179.716 3
 2 -2 -17 140.812 129.801 2
 2 -2 -16 38.8334 96.9504 3
 2 2 -16 83.1468 116.441 2
 2 -2 -16 25.034 63.9062 2
 2 -2 -15 1210.93 318.47 2
 2 2 -15 1121.25 316.358 2
 2 -2 -15 1106.93 313.708 3
 2 2 -14 -31.659 113.412 2
 2 -2 -14 84.8074 83.3993 3
 2 2 -14 34.1464 55.9231 3
 2 -2 -14 241.982 133.246 2
 2 -2 -13 4823.77 589.165 3
 2 2 -13 4328.64 567.579 2
 2 -2 -13 4822.17 564.889 2
 2 2 -13 4761.1 513.526 3
 2 -2 -12 7642.62 674.649 2
 2 2 -12 8408.98 641.583 3
 2 -2 -12 8745.14 750.272 3
 2 2 -12 7861.64 728.961 2
 2 2 -11 1135.36 221.906 3
 2 -2 -11 1133.85 251.796 3
 2 2 -11 777.596 214.261 2
 2 -2 -11 833.392 204.474 2
 2 -2 -10 5962.48 519.382 2
 2 -2 -10 6381.24 572.318 3
 2 2 -10 6229.36 577.239 2
 -2 -2 10 5500.65 329.338 5
 -2 -2 9 5636.72 312.589 5
 -2 -2 9 5576.32 317.975 1
 2 -2 -9 5496.81 457.314 2
 2 2 -9 6261.81 536.831 2
 -2 -2 8 4544.98 262.714 1
 -2 -2 8 5043.38 282.385 5
 2 2 -8 4605.53 432.654 2
 2 -2 -8 4758.59 392.272 2
 -2 -2 7 4114.65 225.87 1
 2 2 -7 4179.18 379.157 2
 -2 -2 7 4426.5 255.427 5
 2 -2 -7 4093.46 328.66 2
 2 2 -6 1139.66 179.441 2
 2 2 -6 1191.17 147.719 5
 -2 -2 6 1190.37 129.84 5
 -2 -2 6 1199.2 103.159 1
 2 2 -5 4359.15 270.602 5
 -2 -2 5 4238.43 160.549 1
 -2 -2 5 4258.48 241.767 5
 -2 -2 4 49.6395 26.9433 5
 2 2 -4 55.4846 28.7416 5
 -2 -2 3 228543 1806.34 5
 -2 -2 2 11351.5 405.523 5
 -2 2 2 11053.4 365.196 5
 -2 -2 1 30969.1 689.23 5
 -2 2 1 30168.8 551.235 5
 -2 -2 1 31654 482.651 1
 -2 -2 0 81.2914 41.1496 4
 -2 -2 0 114.232 36.2319 1
 -2 2 0 98.5506 26.0996 5
 -2 -2 0 117.704 50.6844 5
 -2 -2 -1 31552.5 734.176 5
 -2 -2 -1 32244.3 680.296 1
 2 -2 1 31907.7 443.579 5
 -2 -2 -1 32324.5 812.754 4
 -2 -2 -2 9277.63 407.105 5
 -2 -2 -2 9638.06 417.21 1
 2 2 2 9992.98 389.86 2
 -2 2 -2 9477.09 461.202 2
 2 -2 2 9775.57 205.086 5
 2 -2 2 9109.79 340.005 4
 2 2 3 4722.21 303.602 2
 -2 -2 -3 4347.51 289.256 5
 -2 2 -3 4362.5 258.595 4
 -2 2 -3 4345.93 344.408 2
 -2 -2 -4 32151.2 883.445 2
 2 -2 4 29572.2 752.165 3
 -2 2 -4 31233 1011.85 2
 -2 2 -4 28183.7 752.503 4
 -2 -2 -4 29854.6 777.49 5
 -2 -2 -5 23368.9 835.035 2
 -2 2 -5 23716.4 943.296 2
 -2 -2 -5 23214.7 718.799 5
 2 -2 5 21847.1 692.235 3
 2 2 6 9945.93 563.807 1
 -2 -2 -6 9357.11 577.239 2
 -2 -2 -6 10270.9 664.13 3
 -2 2 -6 10339.1 671.252 2
 -2 -2 -6 10035.1 491.028 5
 -2 -2 -7 561.001 145.262 2
 -2 -2 -7 515.564 114.708 5
 2 -2 7 505.962 129.29 1
 -2 2 -7 660.247 185.916 2
 -2 -2 -7 478.134 136.412 3
 2 2 7 479.198 132.236 1
 2 2 8 68.7421 45.9746 1
 2 -2 8 -10.048 36.4169 1
 -2 -2 -8 14.8052 49.8502 2
 -2 2 -8 11.8438 67.4466 2
 -2 -2 -8 48.8522 44.0123 3
 -2 -2 -8 95.3435 60.2956 5
 2 2 9 1878.72 278.5 1
 -2 2 -9 2265.51 369.601 2
 2 -2 9 1885.76 273.748 1
 -2 -2 -9 1780.23 227.597 5
 -2 -2 -9 1874.4 316.759 2
 -2 2 -10 -78.293 73.688 2
 -2 -2 -10 29.6348 33.9361 5
 2 -2 10 -46.6061 61.9667 1
 -2 -2 -10 -50.7886 84.1927 2
 -2 -2 -11 118.184 91.6116 2
 2 2 11 37.8586 41.7064 1
 2 -2 11 -30.9008 63.9347 1
 -2 2 -11 168.794 171.802 2
 -2 -2 -12 1814.84 374.091 2
 -2 2 -12 2302.74 436.283 2
 2 -2 12 2603.66 363.426 1
 2 -2 13 2855.88 392.65 1
 -2 2 -13 2495.34 473.953 2
 -2 -2 -13 3007.95 493.36 2
 -2 2 -14 38.5253 74.0025 2
 2 -2 14 -52.9945 72.6222 1
 -2 -2 -14 -82.6018 103.855 2
 -2 2 -15 309.208 175.841 2
 -2 -2 -15 -237.637 156.279 2
 -2 -2 -16 -1.91345 42.3694 2
 -2 2 -16 281.943 191.31 2
 -2 2 -17 239.694 193.451 2
 -2 -2 -17 -43.749 81.5792 2
 2 3 -18 168.868 150.774 2
 2 3 -17 120.435 134.011 2
 2 -3 -17 137.713 81.3696 3
 2 -3 -17 238.45 155.73 2
 2 -3 -16 182.431 140.012 3
 2 3 -16 757.258 276.48 2
 2 -3 -16 479.385 203.725 2
 2 -3 -15 604.978 241 3
 2 3 -15 593.159 236.418 2
 2 -3 -15 718.379 243.288 2
 2 3 -14 260.224 161.992 2
 2 -3 -14 252.613 147.602 3
 2 -3 -14 398.677 163.193 2
 2 -3 -13 37.3803 46.4053 2
 2 -3 -13 92.2618 104.955 3
 2 3 -13 105.684 81.18 3
 2 3 -13 -20.2862 84.3183 2
 2 -3 -12 9392.12 803.627 3
 2 3 -12 9320.34 647.626 3
 2 -3 -12 8786.03 706.815 2
 2 3 -12 9009.6 797.185 2
 -2 -3 11 75.6297 36.4649 5
 2 -3 -11 59.0784 60.3881 3
 -2 -3 11 117.96 52.1191 1
 2 3 -11 27.0316 63.6406 2
 2 -3 -11 23.7931 33.5285 2
 2 3 -11 148.019 77.7102 3
 -2 -3 10 810.385 121.348 5
 2 3 -10 657.744 148.301 3
 -2 -3 10 934.736 139.341 1
 2 -3 -10 667.869 169.612 2
 2 3 -10 619.597 187.014 2
 2 -3 -10 900.113 214.791 3
 -2 -3 9 1023.26 134.171 1
 2 -3 -9 658.652 158.225 2
 -2 -3 9 1000.67 129.125 5
 2 3 -9 875.721 204.643 2
 -2 -3 8 50.2691 32.0863 5
 -2 -3 8 5.78501 17.2921 1
 2 3 -8 94.1183 47.9675 2
 2 -3 -8 72.7397 51.2414 2
 -2 -3 7 26230.2 573.537 1
 2 -3 -7 26772 824.345 2
 -2 -3 7 28526 667.642 5
 2 3 -7 27139.8 1004.58 2
 2 3 -6 134.784 64.7865 2
 -2 -3 6 217.926 44.0799 1
 -2 -3 6 166.982 54.5466 5
 -2 -3 5 555.798 98.0031 5
 2 3 -5 212.004 66.1669 5
 2 3 -4 6717.19 368.192 5
 -2 -3 4 6567.34 338.261 5
 -2 -3 3 3656.85 257.446 5
 -2 -3 2 80191.6 1255.9 5
 2 3 -2 82509.6 1049.78 4
 -2 -3 1 286539 2421.83 5
 -2 -3 1 289839 2150.92 4
 -2 -3 1 288833 1616.12 1
 -2 -3 0 34715.8 653.569 1
 -2 -3 0 34438 858.359 5
 -2 -3 0 34312.3 830.716 4
 -2 -3 -1 102850 1286.32 1
 -2 3 -1 105184 1431.61 2
 -2 -3 -1 105942 1523.55 5
 -2 3 -2 5798.37 376.38 2
 -2 -3 -2 5284.18 349.29 5
 2 -3 2 5592.18 239.114 4
 2 -3 3 32964.2 408.473 5
 -2 -3 -3 32225.5 885.487 5
 2 3 3 31700.9 756.343 2
 -2 3 -3 32263.2 969.369 2
 -2 -3 -4 66144 1571.47 3
 -2 3 -4 66200 992.841 4
 2 -3 4 63110.5 1009.04 3
 -2 3 -4 67998.2 1541.82 2
 2 3 4 65587.2 1181.79 2
 -2 -3 -4 64056.5 1308.88 5
 2 -3 5 33.8955 23.3343 3
 -2 3 -5 25.8259 23.6941 4
 -2 -3 -5 -35.3894 94.5022 3
 -2 3 -5 69.2174 45.5214 2
 -2 -3 -5 16.4152 45.1958 2
 2 -3 6 4645.13 310.993 3
 -2 -3 -6 4625.12 470.405 3
 2 3 6 5603.39 427.905 1
 -2 3 -6 4460.97 462.849 2
 -2 3 -6 4662.27 342.345 4
 -2 -3 -6 4636.79 388.764 2
 -2 -3 -7 17521.1 969.648 3
 -2 3 -7 17761.7 967.003 2
 -2 -3 -7 18028.5 830.773 2
 -2 3 -7 17031.5 708.38 4
 2 3 7 20307.5 848.662 1
 -2 3 -8 3286.27 432.504 2
 -2 -3 -8 3449.5 446.251 3
 2 3 8 3461.78 368.666 1
 -2 -3 -8 3517.95 391.157 2
 -2 3 -9 770.404 213.625 2
 -2 -3 -9 1577.42 316.461 3
 -2 -3 -9 1162.94 201.397 5
 -2 -3 -9 947.943 219.182 2
 2 3 9 1052.6 210.193 1
 2 -3 9 1187.99 223.988 1
 -2 3 -10 1804.27 350.882 2
 2 -3 10 1414.27 256.604 1
 -2 -3 -10 1855.4 257.274 5
 -2 -3 -10 1949.37 331.435 2
 -2 3 -11 3367.95 516.87 2
 2 -3 11 3427.44 405.071 1
 -2 -3 -11 2956.19 432.89 2
 2 -3 12 239.542 112.418 1
 -2 3 -12 133.304 67.5321 2
 -2 -3 -12 230.248 119.878 2
 2 -3 13 35.597 47.0343 1
 -2 3 -13 1.15214 54.9537 2
 -2 -3 -13 32.5303 59.3582 2
 -2 3 -14 42.1732 71.6179 2
 2 -3 14 175.466 98.9517 1
 -2 -3 -14 312.995 190.738 2
 -2 3 -15 794.173 289.04 2
 -2 -3 -15 399.975 191.741 2
 -2 3 -16 58.9236 110.089 2
 -2 -3 -16 231.094 161.217 2
 2 -4 -18 -88.0861 117.225 3
 2 4 -17 226.498 181.483 2
 2 -4 -17 168.849 142.39 3
 2 -4 -16 527.115 232.293 3
 2 4 -16 585.396 254.451 2
 2 -4 -16 492.837 200.101 2
 2 -4 -15 335.705 167.634 2
 2 -4 -15 -13.5027 82.2592 3
 2 4 -15 170.406 135.568 2
 2 -4 -14 232.597 129.421 2
 2 -4 -14 109.547 115.702 3
 2 4 -14 -141.42 159.757 2
 2 4 -13 1073.65 291.772 2
 2 -4 -13 1287.76 329.011 3
 2 -4 -13 1920.64 340.257 2
 2 4 -12 428.195 135.447 3
 -2 -4 12 415.016 107.05 1
 2 -4 -12 293.999 124.088 2
 2 -4 -12 72.3152 125.508 3
 2 4 -12 209.301 121.327 2
 2 4 -11 6534.71 485.596 3
 2 -4 -11 6723.32 665.671 3
 -2 -4 11 6752.56 351.066 5
 2 -4 -11 7108.34 585.42 2
 -2 -4 11 6583.22 392.751 1
 2 4 -11 6061.45 631.056 2
 2 4 -10 88.3712 62.1389 2
 2 4 -10 195.722 80.2881 3
 2 -4 -10 143.403 94.5524 3
 2 -4 -10 174.04 83.9774 2
 -2 -4 10 102.617 41.9507 5
 -2 -4 10 262.49 78.5858 1
 2 -4 -9 209.399 95.3779 2
 -2 -4 9 181.163 55.9597 1
 2 4 -9 494.633 166.87 2
 -2 -4 9 228.525 65.3687 5
 -2 -4 8 3231.34 239.96 5
 -2 -4 8 3058.39 217.864 1
 2 -4 -8 3189.33 305.577 2
 2 4 -8 3342.36 393.324 2
 -2 -4 7 12284.6 471.175 5
 2 -4 -7 12904.1 550.528 2
 2 4 -7 12646.7 708.182 2
 -2 -4 6 4681.94 298.556 5
 2 4 -6 4729.94 398.119 2
 -2 -4 5 30488.8 788.608 5
 -2 -4 4 141.99 63.2423 5
 -2 -4 3 29117.7 820.051 5
 2 4 -3 29454.1 625.117 4
 -2 -4 2 184193 2104.69 5
 2 4 -2 185465 1728 4
 -2 -4 1 2555.08 258.86 5
 -2 -4 1 2214.99 206.266 4
 2 -4 0 43211.5 878.571 2
 -2 -4 0 44610.2 1088.54 5
 -2 -4 0 45319.2 1025.48 4
 -2 4 -1 45763.4 986.266 2
 -2 -4 -1 46062.2 1124.1 5
 -2 -4 -2 3556.47 320.138 5
 -2 4 -2 3884.33 321.371 2
 -2 -4 -3 29213 937.744 5
 -2 4 -3 27419.9 932.872 2
 2 -4 3 27565.4 536.214 4
 2 4 3 28021.6 665.974 2
 -2 -4 -4 96.1926 71.0993 5
 2 -4 4 69.8887 31.5466 3
 -2 4 -4 66.5082 75.2313 2
 -2 -4 -4 50.4361 41.7538 3
 2 -4 4 31.3315 20.7777 5
 2 4 4 92.9107 40.6424 2
 -2 -4 -5 17258.4 901.371 3
 -2 4 -5 17851.4 874.461 2
 2 -4 5 17337.5 499.118 3
 -2 4 -5 17567.1 506.197 4
 -2 4 -6 609.284 171.01 2
 -2 -4 -6 749.856 198.019 3
 -2 -4 -6 594.115 138.369 2
 -2 4 -6 689.896 115.567 4
 -2 -4 -7 12.4646 28.7254 2
 -2 4 -7 69.3368 45.3229 4
 -2 -4 -7 -16.4619 76.4803 3
 -2 4 -7 -53.8853 102.011 2
 -2 -4 -8 3932.91 501.033 3
 -2 4 -8 3740.17 475.829 2
 -2 -4 -8 4672.9 442.96 2
 -2 4 -8 5078.12 383.934 4
 -2 4 -9 -19.0793 28.3781 4
 -2 -4 -9 -42.5315 110.344 3
 -2 4 -9 -19.6088 100.822 2
 -2 -4 -9 73.6121 79.5551 2
 -2 4 -10 342.345 111.12 4
 -2 4 -10 603.282 194.756 2
 2 -4 10 548.369 163.127 1
 -2 -4 -10 798.248 189.118 5
 -2 -4 -10 591.191 178.007 2
 -2 -4 -10 314.301 162.362 3
 -2 4 -11 591.006 229.523 2
 2 -4 11 355.888 121.426 1
 -2 -4 -11 605.447 184.701 2
 -2 4 -12 371.548 202.53 2
 -2 -4 -12 235.339 126.283 2
 2 -4 12 177.105 83.4724 1
 -2 4 -13 -69.5043 58.8657 2
 -2 -4 -13 -82.5693 84.6717 2
 -2 -4 -14 466.09 195.134 2
 -2 4 -14 180.024 121.258 2
 -2 -4 -15 453.425 212.571 2
 -2 4 -15 236.423 160.054 2
 -2 4 -16 241.707 166.649 2
 2 -5 -18 -46.042 94.5169 3
 2 5 -17 343.468 197.921 2
 2 -5 -17 171.189 150.841 3
 2 -5 -16 182.533 128.669 3
 2 5 -16 42.8634 80.5089 2
 2 5 -15 227.187 180.311 2
 2 -5 -15 -5.06119 93.737 3
 2 -5 -15 -44.8039 79.5652 2
 2 -5 -14 69.3591 45.9089 2
 2 -5 -14 166.096 135.506 3
 2 5 -14 -51.1329 159.304 2
 2 -5 -13 2441.82 373.672 2
 2 -5 -13 3346.07 535.976 3
 2 5 -13 2598.77 466.851 2
 2 -5 -12 72.0791 73.1876 2
 2 -5 -12 38.2511 112.657 3
 2 5 -12 -33.9405 91.3583 2
 2 -5 -11 178.769 103.723 3
 2 5 -11 273.793 92.3522 3
 2 -5 -11 302.468 122.633 2
 -2 -5 11 182.102 59.5046 5
 -2 -5 11 252.763 76.0011 1
 2 5 -11 246.141 142.496 2
 2 5 -10 1681.09 211.361 3
 -2 -5 10 1777.69 183.035 5
 2 5 -10 1696.68 330.965 2
 2 -5 -10 1731.74 337.208 3
 -2 -5 10 1665.7 184.99 1
 2 -5 -10 1511.96 248.768 2
 -2 -5 9 240.996 62.4505 5
 2 5 -9 97.84 48.5634 2
 2 -5 -9 197.076 74.9762 2
 2 -5 -9 276.373 128.041 3
 -2 -5 9 301.226 76.6923 1
 -2 -5 8 8987.98 427.315 5
 2 5 -8 9678.94 681.576 2
 2 -5 -8 9693.3 512.17 2
 2 5 -7 5665.23 491.706 2
 -2 -5 7 5992.82 359.304 5
 2 -5 -7 5682.58 352.635 2
 2 5 -6 9961.93 602.78 2
 -2 -5 6 10459.1 493.549 5
 2 5 -5 13.4303 43.2653 2
 -2 -5 5 13.8094 42.5426 5
 -2 -5 4 24929.8 813.394 5
 2 5 -4 24377.6 573.003 4
 2 5 -3 37392.9 768.214 4
 -2 -5 3 35936.1 1013.94 5
 -2 -5 2 15263.6 527.849 4
 -2 -5 2 16001.1 691.45 5
 -2 -5 1 1663.7 228.905 5
 2 -5 -1 2126.14 176.643 2
 -2 -5 1 2162.67 219.113 4
 2 -5 0 148.975 53.6744 2
 -2 -5 0 83.421 65.4129 5
 -2 -5 -1 9176.65 546.995 5
 -2 5 -1 8375.47 442.531 2
 -2 -5 -2 3163.1 329.929 5
 -2 5 -2 2822.75 286.654 2
 -2 5 -3 2202.92 272.808 2
 -2 -5 -3 2143.74 295.926 3
 2 5 3 2432.25 184.916 2
 2 -5 3 2067.05 132.753 4
 -2 -5 -3 2154.19 279.87 5
 2 -5 4 4574.79 200.553 3
 -2 -5 -4 4876.44 470.708 3
 2 5 4 4751.33 289.128 2
 -2 5 -4 4379.02 411.742 2
 2 -5 4 4852.53 284.321 5
 2 -5 5 2202.39 147.404 3
 2 -5 5 2143.23 162.41 5
 -2 5 -5 2323.36 329.828 2
 -2 -5 -5 2251.44 333.112 3
 -2 -5 -6 2251.69 366.559 3
 -2 5 -6 2011.39 323.999 2
 2 -5 6 2103.9 115.427 5
 -2 -5 -7 86.1188 48.0354 3
 -2 5 -7 -0.34421 69.7483 2
 -2 5 -8 2248.14 378.824 2
 -2 -5 -8 2050.86 377.627 3
 -2 -5 -8 2287.23 297.402 2
 -2 5 -8 2546.62 235.422 4
 -2 -5 -9 -13.605 58.2872 3
 -2 5 -9 105.14 49.3357 4
 -2 -5 -9 97.1699 89.8065 2
 -2 -5 -10 48.541 39.4071 5
 -2 -5 -10 195.905 158.064 3
 -2 5 -10 193.933 122.974 2
 -2 -5 -10 144.027 59.9962 2
 -2 -5 -11 -8.0178 82.2409 5
 -2 -5 -11 51.4422 83.0566 2
 2 -5 11 -25.0675 69.9926 1
 -2 5 -11 148.443 156.313 2
 -2 5 -12 1873.92 414.132 2
 -2 -5 -12 2177.91 365.152 2
 2 -5 12 1708.41 295.532 1
 -2 5 -13 281.323 194.924 2
 2 -5 13 338.32 138.512 1
 -2 -5 -13 552.514 199.711 2
 -2 5 -14 324.545 186.495 2
 -2 5 -15 24.9739 124.137 2
 -2 5 -16 805.285 309.493 2
 2 -6 -18 1.24883 59.678 3
 2 6 -17 420.325 225.784 2
 2 -6 -17 75.7095 84.4485 3
 2 -6 -16 -35.5818 79.4978 3
 2 6 -16 -10.1699 68.2217 2
 2 -6 -15 1133.81 352.912 3
 2 6 -15 768.892 289.755 2
 2 6 -14 1084.92 318.737 2
 2 -6 -14 1102.51 325.486 3
 2 -6 -13 375.498 144.573 2
 2 6 -13 188.789 155.926 2
 2 -6 -13 412.148 190.261 3
 2 6 -12 956.065 278.405 2
 2 -6 -12 1165.45 238.052 2
 2 -6 -12 1398.32 360.423 3
 2 -6 -11 886.971 259.398 3
 -2 -6 11 778.913 136.782 1
 2 6 -11 507.298 219.036 2
 -2 -6 11 993.867 140.792 5
 2 -6 -11 938.511 196.16 2
 2 -6 -10 346.809 119.607 2
 -2 -6 10 228.411 74.8685 1
 2 6 -10 361.433 87.7197 3
 2 -6 -10 316.717 155.425 3
 2 6 -10 316.493 125.197 2
 -2 -6 10 331.802 82.8034 5
 2 -6 -9 9636.85 779.429 3
 2 -6 -9 8897.55 529.354 2
 2 6 -9 10096.2 753.857 2
 -2 -6 9 9185.7 453.671 5
 -2 -6 8 542.901 116.617 5
 2 -6 -8 354.072 93.4449 2
 2 -6 -8 486.93 165.018 3
 2 6 -8 98.0532 61.3993 2
 -2 -6 7 1568.76 202.65 5
 2 6 -7 1414.41 250.196 2
 2 -6 -7 1344.77 164.041 2
 -2 -6 6 1115.78 175.709 5
 2 -6 -6 1316.49 137.705 2
 2 6 -6 1495.85 240.513 2
 2 6 -5 48.8974 40.8436 2
 -2 -6 5 73.2437 51.9796 5
 2 6 -5 9.78492 13.1149 4
 -2 -6 4 25210.2 900.976 5
 2 6 -4 24129.3 611.485 4
 2 6 -4 25695.1 842.285 2
 -2 -6 3 13288.1 666.614 5
 -2 -6 2 799.633 127.794 4
 2 -6 -2 918.309 105.426 2
 -2 -6 2 749.724 155.784 5
 2 -6 -1 12049.3 442.154 2
 -2 -6 1 12432.5 665.359 5
 -2 -6 1 12744.7 570.018 4
 2 -6 0 138.417 54.5956 2
 -2 -6 0 249.577 97.6261 5
 -2 6 -1 12163.3 557.995 2
 -2 -6 -1 11857.7 674.151 5
 -2 -6 -2 10418.1 646.659 5
 -2 6 -2 10397.5 562.569 2
 2 6 3 25435.1 570.599 2
 -2 -6 -3 26388.7 1081.19 3
 2 -6 3 26082.2 446.271 4
 -2 6 -3 26827.7 977.166 2
 -2 -6 -3 26451.3 1046.01 5
 2 6 4 23882.6 603.729 2
 -2 -6 -4 25383.4 1125.53 3
 2 -6 4 24172.4 729.115 5
 -2 6 -4 24812.2 1012.89 2
 -2 -6 -5 25473.5 1181.8 3
 -2 6 -5 26933.7 1129.56 2
 2 6 5 24909.1 680.634 2
 2 -6 5 25483.5 684.687 5
 -2 6 -6 1618.65 298.344 2
 2 -6 6 1791.67 156.885 5
 -2 -6 -6 1523.21 308.235 3
 -2 6 -7 90.8836 113.11 2
 -2 -6 -7 141.621 137.711 3
 2 -6 7 101.997 26.6935 5
 -2 6 -8 2837.85 444.282 2
 -2 -6 -8 3131.38 473.1 3
 -2 -6 -9 9985.8 881.172 3
 -2 6 -9 10064.6 848.023 2
 -2 -6 -10 2036.52 414.189 3
 -2 -6 -10 1764.13 310.995 5
 -2 6 -10 1416.73 332.405 2
 -2 -6 -11 472.361 166.16 5
 -2 6 -11 382.485 150.905 2
 2 -6 11 645.049 178.777 1
 2 -6 12 165.185 89.863 1
 -2 6 -12 217.693 143.515 2
 -2 6 -13 1605.51 412.037 2
 -2 6 -14 512.269 232.373 2
 -2 6 -15 1209.65 373.514 2
 2 -7 -17 -165.808 156.308 3
 2 7 -16 662.549 289.005 2
 2 -7 -16 514.395 262.477 3
 2 -7 -15 21.7639 48.8775 3
 2 7 -15 -8.65576 105.258 2
 2 7 -14 104.206 118.141 2
 2 -7 -14 120.935 104.61 3
 2 7 -13 393.76 227.903 2
 2 -7 -13 313.705 210.2 3
 2 -7 -12 6928.19 785.402 3
 2 7 -12 5542.29 672.157 2
 2 -7 -12 5732.46 515.993 2
 2 -7 -11 572.108 154.256 2
 2 7 -11 558.242 194.654 2
 2 -7 -11 425.883 205.246 3
 2 -7 -10 518.768 210.095 3
 2 7 -10 524.594 185.109 2
 -2 -7 10 489.217 110.499 5
 2 -7 -10 258.832 96.6837 2
 2 -7 -9 315.683 149.952 3
 2 7 -9 210.164 131.631 2
 -2 -7 9 162.656 63.4584 5
 2 -7 -9 76.5477 45.2335 2
 2 7 -9 126.23 44.4696 3
 -2 -7 8 4755.42 370.954 5
 2 -7 -8 4554.06 534.996 3
 2 -7 -8 4000.07 305.658 2
 2 7 -8 4265.32 476.066 2
 2 -7 -7 3990.94 475.639 3
 -2 -7 7 4133.96 354.868 5
 2 7 -7 3892.7 211.008 4
 2 -7 -7 4015.13 265.228 2
 2 7 -7 3801.42 429.187 2
 2 7 -6 8083.54 316.584 4
 -2 -7 6 8578.48 530.851 5
 2 -7 -6 8319.12 327.999 2
 2 7 -6 8720.89 601.916 2
 -2 -7 5 14551.1 715.179 5
 2 7 -5 14707.6 720.246 2
 2 7 -4 96.7549 39.1626 2
 -2 -7 4 105.201 51.6884 5
 -2 -7 3 16223.9 795.827 5
 2 7 -3 15542.4 558.654 3
 -2 -7 3 15305 539.184 4
 2 -7 -3 14735.7 383.462 2
 2 7 -3 15934.1 634.983 2
 -2 -7 2 19422.5 683.898 4
 2 7 -2 18527.3 665.113 3
 2 -7 -2 18815.2 493.286 2
 -2 -7 2 19123.8 877.063 5
 -2 -7 1 631.112 134.315 4
 -2 -7 1 481.335 137.207 5
 2 -7 -1 612.771 102.51 2
 -2 -7 0 18628 894.755 5
 -2 -7 -1 13334.3 773.635 5
 -2 7 -1 14137.4 623.646 2
 -2 -7 -2 6586.47 550.611 5
 -2 7 -2 7017.9 481.482 2
 -2 7 -3 12022.1 682.365 2
 -2 -7 -3 11522.9 740.746 3
 2 7 3 11408.3 345.948 2
 -2 -7 -3 9893.79 683.954 5
 -2 -7 -4 5576.59 547.265 3
 -2 7 -4 5367.63 482.271 2
 2 7 4 5168.8 256.363 2
 2 -7 4 5008.13 374.959 5
 2 7 5 118.162 43.7995 2
 -2 7 -5 144.156 83.6224 2
 -2 -7 -5 130.074 121.928 3
 2 -7 5 73.3297 49.2685 5
 2 -7 6 1756.02 190.184 5
 -2 7 -6 1214.12 267.341 2
 -2 -7 -6 1023.54 271.924 3
 2 7 6 1601.98 173.349 2
 -2 -7 -7 2.34834 49.5625 3
 2 -7 7 137.849 47.8495 5
 -2 7 -7 77.5686 108.936 2
 -2 -7 -8 -19.3057 96.9118 3
 -2 7 -8 -101.901 93.7654 2
 -2 7 -9 -43.3254 99.26 2
 -2 -7 -9 150.386 138.507 3
 -2 -7 -10 -19.6539 71.9053 5
 -2 -7 -10 -60.1477 68.9868 3
 -2 7 -10 113.415 94.0817 2
 -2 7 -11 1678.99 382.543 2
 -2 -7 -11 2145.04 374.176 5
 -2 7 -12 -21.0227 109.121 2
 2 -7 12 142.646 94.0969 1
 -2 7 -13 83.9821 82.5461 2
 -2 7 -14 -32.9762 85.077 2
 -2 7 -15 94.7657 159.804 2
 2 -8 -17 -241.871 187.319 3
 2 8 -16 -34.766 99.2936 2
 2 -8 -16 -25.4863 85.4879 3
 2 -8 -15 1453.85 409.756 3
 2 8 -15 1711.54 441.46 2
 2 -8 -14 1321.82 366.039 3
 2 8 -14 1327.99 358.174 2
 2 -8 -13 1933.8 426.908 3
 2 8 -13 2380.74 474.694 2
 2 8 -12 3371.78 537.009 2
 2 -8 -12 4426.93 649.679 3
 2 -8 -11 1282.17 339.694 3
 2 8 -11 775.042 244.968 2
 2 -8 -10 4.36888 102.766 3
 2 -8 -10 -1.26287 30.2019 2
 2 8 -10 -20.8923 101.263 2
 -2 -8 10 -0.42427 33.7646 5
 -2 -8 9 234.019 75.4093 5
 2 8 -9 98.1331 104.527 2
 2 -8 -9 207.529 76.7406 2
 2 -8 -9 404.232 183.551 3
 2 -8 -8 281.851 77.2954 2
 2 -8 -8 386.938 189.702 3
 -2 -8 8 221.11 85.5536 5
 2 8 -8 219.923 109.024 2
 2 -8 -7 4067.57 497.63 3
 -2 -8 7 4358.71 396.023 5
 2 8 -7 3778.04 434.435 2
 2 -8 -7 3988.84 244.05 2
 2 -8 -6 1128.42 249.061 3
 -2 -8 6 1005.84 195.878 5
 2 -8 -6 1107.71 105.492 2
 2 8 -6 746.802 173.636 2
 2 -8 -5 371.083 47.9705 2
 2 8 -5 682.944 100.985 3
 -2 -8 5 399.664 133.894 5
 2 8 -5 448.067 135.634 2
 2 -8 -4 103.189 26.6793 2
 -2 -8 4 113.369 78.2863 5
 2 8 -4 128.832 45.9356 3
 2 8 -4 166.44 71.6941 2
 -2 -8 3 879.817 141.301 4
 2 -8 -3 650.058 77.8065 2
 -2 -8 3 675.344 167.157 5
 2 8 -3 773.764 128.527 3
 2 8 -3 800.059 147.904 2
 2 8 -2 8503 440.49 2
 -2 -8 2 7792.69 600.135 5
 2 -8 -2 8255.31 331.252 2
 -2 -8 2 8208.1 477.487 4
 -2 -8 1 829.941 200.47 5
 2 -8 -1 802.503 120.323 2
 -2 -8 0 30248.1 1217.27 5
 -2 -8 -1 28574.5 1202.65 5
 -2 8 -1 28206.9 912.872 2
 -2 -8 -2 1290.12 258.177 5
 -2 8 -2 1154.8 200.134 2
 -2 8 -3 5783.03 481.004 2
 2 -8 3 5259.28 229.348 3
 -2 -8 -3 5683.41 554.226 5
 2 8 3 5246.44 208.197 2
 -2 8 -4 762.036 186.576 2
 -2 -8 -4 401.193 177.333 3
 2 -8 4 699.896 154.788 5
 -2 -8 -4 411.107 124.915 5
 2 8 4 590.941 76.1521 2
 -2 8 -5 154.713 79.1156 2
 2 -8 5 355.294 104.282 5
 2 8 5 327.342 64.3857 2
 -2 -8 -5 217.681 116.466 3
 2 -8 6 690.22 139.041 5
 -2 -8 -6 612.685 204.568 3
 -2 8 -6 536.195 173.909 2
 -2 8 -7 -2.57716 108.895 2
 2 -8 7 4.7642 25.5908 5
 -2 -8 -7 54.1377 96.781 3
 -2 8 -8 369.277 148.545 2
 -2 -8 -8 393.851 195.167 3
 -2 8 -9 -24.002 88.8692 2
 -2 -8 -9 -52.5875 104.793 3
 -2 -8 -10 1265.37 346.979 3
 -2 8 -10 1025.77 321.998 2
 -2 -8 -10 650.582 207.014 5
 -2 -8 -11 1391.64 318.667 5
 -2 8 -11 1122.27 309.716 2
 -2 8 -12 148.309 142.904 2
 -2 8 -13 -368.48 204.403 2
 -2 8 -14 238.941 173.686 2
 -2 8 -15 264.908 191.722 2
 2 -9 -16 597.329 294.701 3
 2 9 -16 -464.734 246.425 2
 2 9 -15 406.748 222.533 2
 2 -9 -15 618.337 281.838 3
 2 -9 -14 199.035 147.433 3
 2 9 -14 589.822 272.939 2
 2 -9 -13 2060.22 478.103 3
 2 9 -13 619.717 221.378 2
 2 -9 -12 264.726 176.794 3
 2 9 -12 245.102 162.514 2
 2 9 -11 4975.83 639.088 2
 2 -9 -11 4939.6 673.7 3
 -2 -9 10 687.088 150.242 5
 2 -9 -10 719.795 249.515 3
 2 9 -10 896.946 270.603 2
 -2 -9 9 5933.14 460.567 5
 2 -9 -9 5318.99 652.639 3
 2 9 -9 5336.79 605.959 2
 2 -9 -8 1811.53 168.186 2
 2 -9 -8 2040.44 373.263 3
 -2 -9 8 1801.51 260.306 5
 2 9 -8 1758.82 318.014 2
 2 -9 -7 6351.51 648.966 3
 2 -9 -7 5194.75 228.437 2
 2 9 -7 6557.68 596.138 2
 -2 -9 7 5921.84 492.906 5
 2 9 -6 4874.12 478.612 2
 2 -9 -6 5065.11 545.978 3
 2 9 -6 4519.03 215.187 3
 -2 -9 6 4807.55 464.01 5
 2 9 -5 10397.6 401.111 3
 2 -9 -5 12298.8 805.11 3
 2 9 -5 10536.8 667.857 2
 -2 -9 5 10347.7 693.64 5
 2 9 -4 32505.7 805.164 3
 2 -9 -4 35223.6 1292.14 3
 2 9 -4 33756.4 1096.03 2
 -2 -9 4 34790.6 1303.89 5
 -2 -9 3 6755.88 581.705 5
 2 -9 -3 5906.51 229.967 2
 -2 -9 3 5303.53 369.241 4
 2 9 -3 5857.79 420.657 2
 -2 -9 2 235.799 76.8167 4
 2 -9 -2 278.264 63.169 2
 -2 -9 2 332.719 123.179 5
 2 9 -2 274.373 87.7076 2
 2 9 -1 5302.55 330.191 2
 2 -9 -1 4797.37 299.555 2
 -2 -9 1 4859.82 511.04 5
 -2 -9 0 121.814 108.277 5
 2 9 0 0.1946 12.9078 2
 -2 -9 -1 395.157 155.325 5
 -2 9 -1 323.328 104.096 2
 2 -9 1 416.107 96.6036 3
 -2 9 -2 2980.28 334.306 2
 -2 -9 -2 2896.78 414.202 5
 2 -9 2 3005.93 235.424 3
 -2 9 -3 721.758 166.806 2
 2 -9 3 908.109 107.877 3
 -2 -9 -3 790.369 241.172 5
 -2 -9 -4 -64.3563 74.4168 3
 -2 9 -4 33.1458 56.4566 2
 2 -9 4 -9.81143 39.6726 5
 -2 -9 -4 30.0533 57.1374 5
 -2 9 -5 198.803 102.509 2
 -2 -9 -5 166.944 95.0405 3
 2 -9 5 -8.39317 28.7568 5
 -2 -9 -5 -9.40006 43.3534 5
 -2 9 -6 611.225 204.845 2
 2 -9 6 475.599 127.79 5
 -2 -9 -6 348.978 140.65 3
 -2 9 -7 382.088 161.941 2
 -2 -9 -7 252.977 149.078 3
 2 -9 7 384.664 105.648 5
 -2 9 -8 525.78 204.932 2
 -2 -9 -8 267.967 189.542 3
 -2 -9 -9 -7.95968 91.9514 5
 -2 -9 -9 11.9547 70.8226 3
 -2 -9 -10 1549.13 382.841 3
 -2 9 -10 1386.67 340.266 2
 -2 -9 -10 932.511 256.563 5
 -2 9 -11 147.784 107.28 2
 -2 -9 -11 77.0651 47.6781 5
 -2 9 -12 1025.83 306.802 2
 -2 9 -13 -157.028 85.9455 2
 -2 9 -14 -97.1816 151.777 2
 2 -10 -16 112.287 127.434 3
 2 -10 -15 375.998 245.071 3
 2 10 -15 179.659 207.762 2
 2 -10 -14 19.4485 79.3735 3
 2 10 -14 46.6591 106.277 2
 2 10 -13 362.755 189.664 2
 2 -10 -13 72.5052 78.1299 3
 2 10 -12 251.609 135.287 2
 2 -10 -12 342.846 181.205 3
 2 10 -11 338.522 165.76 2
 2 -10 -11 434.577 208.469 3
 -2 -10 10 2869.77 326.404 5
 2 10 -10 2337.93 431.822 2
 2 -10 -10 3420.67 561.32 3
 -2 -10 9 2691.55 330.655 5
 2 -10 -9 2294.22 430.834 3
 2 10 -9 3507.42 495.452 2
 2 -10 -8 1222.52 313.295 3
 2 10 -8 578.521 181.221 2
 -2 -10 8 896.758 203.987 5
 2 -10 -7 9541.18 822.55 3
 2 10 -7 8519.57 695.585 2
 -2 -10 7 8699.19 645.19 5
 2 -10 -6 20001.8 1126.73 3
 -2 -10 6 18593.6 971.677 5
 2 10 -6 19767.2 1008.18 2
 2 -10 -5 8521.99 710.394 3
 -2 -10 5 8068.76 647.777 5
 2 10 -5 7810.1 348.215 3
 2 10 -5 7739.16 586.643 2
 -2 -10 4 3456.52 438.931 5
 2 10 -4 3304.83 263.425 3
 2 -10 -4 3497.69 434.634 3
 2 10 -4 3500.73 370.264 2
 -2 -10 3 703.895 203.437 5
 -2 -10 3 606.119 133.554 4
 2 -10 -3 430.591 138.587 3
 2 -10 -3 526.677 63.6303 2
 2 10 -3 717.151 154.06 2
 2 -10 -2 3577.18 388.722 3
 2 10 -2 2951.66 289.745 2
 -2 -10 2 3249.3 336.329 4
 -2 -10 2 3543.69 457.349 5
 2 -10 -2 3150.1 208.545 2
 2 -10 -1 2828.52 324.248 3
 2 10 -1 3009.76 264.09 2
 -2 -10 1 2573.67 388.518 5
 2 -10 0 1995.7 252.752 3
 2 10 0 2137.89 194.927 2
 -2 -10 0 1920.44 341.843 5
 2 -10 1 705.884 139.261 3
 2 10 1 561.12 85.0804 2
 -2 -10 -1 646.818 213.92 5
 -2 10 -1 523.86 131.525 2
 2 -10 2 613.464 120.119 3
 2 10 2 574.987 66.3991 2
 -2 -10 -2 536.592 174.604 5
 -2 10 -2 521.907 139.416 2
 -2 10 -3 14410.8 809.825 2
 2 -10 3 13457.1 460.338 3
 -2 -10 -3 13541.9 960.634 5
 -2 -10 -4 -206.567 126.869 5
 -2 10 -4 -32.3605 90.8619 2
 2 -10 4 101.746 77.9648 5
 2 -10 5 1250.64 235.648 5
 -2 -10 -5 1671.49 351.029 3
 -2 10 -5 1689.15 321.708 2
 -2 -10 -5 1398.98 304.293 5
 -2 -10 -6 206.289 108.932 5
 -2 10 -6 122.631 68.4499 2
 -2 -10 -6 106.369 72.2648 3
 2 -10 6 163.001 75.6065 5
 -2 -10 -7 2196.6 426.033 3
 -2 10 -7 1939.04 375.126 2
 2 -10 7 2284.02 282.353 5
 -2 -10 -7 2831.14 454.756 5
 -2 10 -8 185.796 134.643 2
 -2 -10 -8 85.7949 92.8727 3
 -2 -10 -8 -1.4452 97.3363 5
 -2 -10 -9 516.745 197.364 5
 -2 -10 -9 678.854 274.586 3
 -2 10 -9 1074.33 288.119 2
 -2 10 -10 2145.61 443.499 2
 -2 -10 -10 1111.67 300.097 5
 -2 10 -11 1068.33 338.719 2
 -2 -10 -11 839.886 266.004 5
 -2 -10 -12 -145.168 150.958 5
 -2 10 -12 204.59 170.157 2
 -2 10 -13 -44.5056 125.849 2
 -2 10 -14 74.2162 114.616 2
 2 11 -15 310.15 173.827 2
 2 -11 -15 325.332 215.084 3
 2 11 -14 186.903 128.334 2
 2 -11 -14 -157.861 152.669 3
 2 11 -13 1145.57 344.888 2
 2 -11 -13 2208.5 522.362 3
 2 -11 -12 -9.4358 86.1236 3
 2 11 -12 -89.2536 156.596 2
 2 -11 -11 53.616 119.527 3
 2 11 -11 108.189 144.47 2
 2 11 -10 13.5808 75.972 2
 2 -11 -10 148.415 93.8279 3
 2 11 -9 4846.74 596.704 2
 2 -11 -9 5306.35 692.041 3
 -2 -11 9 4866.46 476.263 5
 2 -11 -8 -87.1384 130.982 3
 -2 -11 8 -10.2067 59.3926 5
 -2 -11 7 9015.83 694.485 5
 2 -11 -7 9030.73 829.27 3
 2 11 -7 9738.75 766.871 2
 2 -11 -6 4948.58 583.337 3
 -2 -11 6 5409.35 552.689 5
 2 11 -6 5196.09 528.575 2
 2 -11 -5 8459.26 734.486 3
 -2 -11 5 7649.73 668.153 5
 2 11 -5 7413.1 601.562 2
 2 -11 -4 607.117 209.279 3
 -2 -11 4 422.401 183.324 5
 2 11 -4 867.684 200.956 2
 -2 -11 3 2940.02 430.441 5
 2 -11 -3 3538.54 430.075 3
 -2 -11 3 3099.97 313.482 4
 2 11 -3 2991.59 330.985 2
 2 -11 -2 2133.91 170.153 2
 -2 -11 2 2572.03 403.822 5
 2 11 -2 2257.57 266.133 2
 -2 -11 2 1884.74 268.321 4
 2 -11 -2 2148.93 315.943 3
 2 -11 -1 2454.18 319.009 3
 -2 -11 1 2307.15 389.755 5
 2 11 -1 2348.23 247.562 2
 2 11 0 210.554 67.5269 2
 2 -11 0 136.787 74.9494 3
 -2 -11 0 367.127 186.313 5
 -2 11 -1 161.484 75.0062 2
 2 11 1 143.857 46.9131 2
 -2 -11 -1 192.787 90.9518 5
 2 -11 1 190.224 75.4566 3
 2 11 2 1955.63 114.712 2
 -2 11 -2 2512.38 327.161 2
 2 -11 2 2213.18 241.577 3
 -2 -11 -2 2415.08 422.693 5
 2 -11 3 3135.14 413.622 5
 2 -11 3 2656.27 223.851 3
 -2 11 -3 2947.62 378.687 2
 -2 -11 -3 3153.98 481.011 5
 -2 11 -4 2578.17 376.977 2
 2 -11 4 2001.33 320.823 5
 -2 -11 -4 1798.62 375.067 5
 -2 11 -5 13957.7 914.341 2
 2 -11 5 12664.5 792.938 5
 -2 -11 -5 13471.3 1029.65 5
 2 -11 6 830.608 191.27 5
 -2 -11 -6 585.949 217.813 3
 -2 11 -6 625.611 223.069 2
 -2 -11 -6 660.003 216.965 5
 -2 -11 -7 2278.08 439.811 3
 2 -11 7 2477.46 320.426 5
 -2 -11 -7 2546.19 452.56 5
 -2 11 -7 2425.73 427.514 2
 -2 -11 -8 7845.27 817.845 5
 -2 -11 -8 8714.68 915.251 3
 -2 11 -8 8410.9 820.928 2
 -2 11 -9 1293.75 336.332 2
 -2 -11 -9 931.868 287.062 5
 -2 11 -10 127.063 102.23 2
 -2 -11 -10 -63.0822 134.475 5
 -2 11 -11 1047.69 338.176 2
 -2 -11 -11 984.274 296.092 5
 -2 -11 -12 349.166 189.394 5
 -2 11 -12 299.116 188.903 2
 -2 11 -13 4.49785 54.6675 2
 2 12 -14 310.189 176.182 2
 2 -12 -14 1118.02 386.262 3
 2 -12 -13 -39.9469 154.906 3
 2 12 -13 37.6259 71.6434 2
 2 12 -12 -82.4469 141.771 2
 2 -12 -12 72.6841 123.396 3
 2 -12 -11 29.9523 75.6477 3
 2 12 -11 -338.611 183.01 2
 2 12 -10 2268.66 434.695 2
 2 -12 -10 1994.12 447.824 3
 2 12 -9 480.181 189.82 2
 -2 -12 9 319.4 135.075 5
 2 -12 -9 672.508 233.909 3
 2 -12 -8 4912.3 658.4 3
 -2 -12 8 4789.45 520.025 5
 2 12 -8 4545.3 566.254 2
 -2 -12 7 671.883 195.473 5
 2 12 -7 687.909 215.43 2
 2 -12 -7 598.301 206.059 3
 2 12 -6 972.991 236.936 2
 2 -12 -6 933.835 266.108 3
 -2 -12 6 852.391 235.486 5
 -2 -12 5 2342.08 382.427 5
 2 -12 -5 3108.49 461.405 3
 2 12 -5 2494.43 356.196 2
 2 12 -4 5335.66 493.951 2
 -2 -12 4 5461.73 602.797 5
 2 -12 -4 5230.12 572.727 3
 -2 -12 4 5133.44 375.975 4
 -2 -12 3 313.185 112.572 4
 -2 -12 3 148.64 90.5923 5
 2 -12 -3 215.583 119.125 3
 2 12 -3 143.393 73.8576 2
 2 12 -2 5402.93 430.624 2
 2 -12 -2 5496.71 531.947 3
 -2 -12 2 5812.72 638.643 5
 -2 -12 2 5383.92 477.371 4
 2 12 -1 169.699 69.1051 2
 -2 -12 1 305.117 162.722 5
 2 -12 -1 165.366 86.4796 3
 -2 -12 0 2785.83 453.13 5
 2 12 0 2904.61 254.684 2
 2 -12 0 2946.64 355.84 3
 2 -12 1 202.493 86.9237 3
 2 12 1 127.436 46.5223 2
 -2 12 -1 73.1946 60.9248 2
 -2 -12 -1 269.562 149.812 5
 -2 12 -2 2921.43 357.825 2
 2 -12 2 2678.43 282.269 3
 -2 -12 -2 3316.75 511.435 5
 -2 -12 -3 20.1097 100.438 5
 2 -12 3 -77.0921 77.9718 5
 -2 12 -3 130.132 73.8009 2
 -2 12 -4 18.6979 45.3307 2
 2 -12 4 -0.9092 66.2405 5
 -2 -12 -4 -38.6577 154.704 5
 -2 -12 -5 4837.4 643.248 5
 -2 12 -5 5377.62 587.662 2
 2 -12 5 5813.89 575.023 5
 -2 12 -6 828.407 246.008 2
 2 -12 6 1079.65 253.613 5
 -2 -12 -6 734.201 237.566 5
 -2 12 -7 1656.76 352.637 2
 -2 -12 -7 1072.85 303.496 5
 -2 -12 -8 480.579 210.957 5
 -2 12 -8 551.373 192.734 2
 -2 -12 -9 49.4827 57.9816 5
 -2 12 -9 102.799 139.359 2
 -2 12 -10 1387.78 371.692 2
 -2 -12 -10 1559.87 386.87 5
 -2 12 -11 -24.3211 149.896 2
 -2 -12 -11 23.6575 116.504 5
 -2 -12 -12 98.7789 149.161 5
 -2 12 -12 708.322 289.412 2
 -2 12 -13 669.012 285.73 2
 2 -13 -14 168.351 81.1134 3
 2 13 -14 215.994 191.822 2
 2 -13 -13 1025.82 372.25 3
 2 13 -13 125.476 131.064 2
 2 13 -12 135.529 152.779 2
 2 -13 -12 54.5972 93.2672 3
 2 -13 -11 91.7077 84.5369 3
 2 13 -11 571.047 246.928 2
 2 13 -10 -85.3986 120.624 2
 2 -13 -10 147.439 165.478 3
 -2 -13 9 138.881 100.304 5
 2 -13 -9 -103.058 154.341 3
 2 13 -9 29.7576 66.0703 2
 2 -13 -8 325.061 133.972 3
 2 13 -8 100.67 64.4879 2
 -2 -13 8 162.556 95.9426 5
 -2 -13 7 -4.05568 76.794 5
 2 13 -7 59.2174 84.5059 2
 2 -13 -7 216.254 138.525 3
 -2 -13 6 382.091 159.86 5
 2 -13 -6 801.271 246.172 3
 2 13 -6 581.72 174.94 2
 2 13 -5 12545.9 836.05 2
 2 -13 -5 12376.8 955.451 3
 -2 -13 5 11661.6 912.467 5
 2 -13 -4 722.107 224.487 3
 -2 -13 4 548.133 185.836 5
 -2 -13 4 637.08 139.903 4
 2 13 -4 450.576 143.507 2
 -2 -13 3 1218.46 213.371 4
 2 13 -3 1182.37 225.908 2
 2 -13 -3 1261.89 283.224 3
 -2 -13 3 1332.9 318.672 5
 2 -13 -2 619.653 185.384 3
 -2 -13 2 778.672 193.836 4
 -2 -13 2 656.071 242.361 5
 2 13 -2 930.553 186.126 2
 2 -13 -1 3785.64 444.125 3
 -2 -13 1 4943.77 626.849 5
 -2 -13 1 3842.78 452.442 4
 2 13 -1 4338.6 358.292 2
 2 -13 0 -11.2189 50.7047 3
 -2 -13 0 -79.209 90.9003 5
 2 13 0 6.57042 17.8571 2
 2 -13 1 2991.52 347.157 3
 -2 -13 -1 2621.47 471.422 5
 2 -13 2 71.3448 43.0673 3
 -2 13 -2 32.4673 51.8323 2
 -2 -13 -2 -74.208 118.388 5
 -2 -13 -3 906.392 273.552 5
 2 -13 3 618.521 199.95 5
 -2 13 -3 496.637 158.853 2
 2 -13 4 2431.93 397.53 5
 -2 -13 -4 1731.89 389.474 5
 -2 13 -4 1823.66 330.965 2
 -2 -13 -5 4240.48 615.28 5
 -2 13 -5 4143.7 531.09 2
 2 -13 5 3115.76 440.436 5
 -2 13 -6 289.531 151.35 2
 -2 -13 -6 531.005 222.689 5
 2 -13 6 523.051 184.471 5
 -2 13 -7 627.475 233.643 2
 -2 -13 -7 306.558 172.104 5
 -2 13 -8 1041.46 298.097 2
 -2 -13 -8 1006.97 318.496 5
 -2 13 -9 1772.29 409.971 2
 -2 -13 -9 1747.84 417.279 5
 -2 13 -10 107.01 83.4906 2
 -2 -13 -10 219.546 163.23 5
 -2 13 -11 771.513 294.341 2
 -2 -13 -11 934.284 316.764 5
 -2 -13 -12 -100.145 125.759 5
 -2 13 -12 293.503 162.45 2
 -2 13 -13 2044.37 516.675 2
 2 14 -13 98.2966 118.352 2
 2 -14 -13 92.1058 154.08 3
 2 14 -12 282.324 187.032 2
 2 -14 -12 237.19 182.845 3
 2 14 -11 -58.1098 135.921 2
 2 -14 -11 45.4396 80.6491 3
 2 14 -10 639.756 240.78 2
 2 -14 -10 1113.05 354.096 3
 -2 -14 9 472.257 175.45 5
 2 14 -9 713.284 247.453 2
 2 -14 -9 318.362 174.421 3
 -2 -14 8 8.85051 64.9819 5
 2 -14 -8 203.525 129.753 3
 2 14 -8 200.375 138.147 2
 2 -14 -7 1111.6 326.911 3
 -2 -14 7 691.62 227.287 5
 2 14 -7 814.027 231.088 2
 2 -14 -6 2287.9 451.859 3
 2 14 -6 1989.46 362.146 2
 -2 -14 6 1622.12 355.529 5
 2 14 -5 111.403 77.2507 2
 2 -14 -5 202.847 122.941 3
 -2 -14 5 420.627 170.032 5
 2 14 -4 550.7 170.131 2
 2 -14 -4 800.921 260.8 3
 -2 -14 4 186.712 107.412 5
 2 -14 -3 2090.52 377.376 3
 2 14 -3 1944.81 296.582 2
 -2 -14 3 1733.11 267.53 4
 -2 -14 3 1956 406.207 5
 2 14 -2 2372.87 305.197 2
 2 -14 -2 1913.65 346.139 3
 -2 -14 2 2122.32 325.961 4
 -2 -14 2 2752.88 475.259 5
 -2 -14 1 -50.7744 72.7243 5
 -2 -14 1 -129.833 89.7233 4
 2 -14 -1 49.705 46.1682 3
 2 -14 0 1158 239.606 3
 -2 -14 0 969.008 290.26 5
 2 -14 1 880.444 195.154 3
 -2 -14 -1 856.598 268.849 5
 2 -14 2 1415.74 340.1 5
 -2 14 -2 921.766 207.191 2
 -2 -14 -2 790.973 270.985 5
 -2 -14 -3 4896.03 683.691 5
 -2 14 -3 3933.62 469.635 2
 2 -14 3 4171.48 562.986 5
 2 -14 4 -72.3507 99.469 5
 -2 -14 -4 91.6026 81.2104 5
 -2 14 -4 63.8197 89.7045 2
 2 -14 5 1703.08 346.557 5
 -2 -14 -5 1424.22 381.71 5
 -2 14 -5 1773.39 358.33 2
 -2 14 -6 3194.92 499.15 2
 -2 -14 -6 3784.28 622.27 5
 2 -14 6 3814.67 501.814 5
 -2 14 -7 161.584 144.881 2
 -2 -14 -7 -250.902 172.351 5
 -2 -14 -8 93.2663 122.209 5
 -2 14 -8 149.156 143.196 2
 -2 14 -9 -20.0099 100.188 2
 -2 -14 -9 335.718 194.591 5
 -2 14 -10 209.213 142.574 2
 -2 -14 -10 154.959 129.83 5
 -2 14 -11 155.321 141.767 2
 -2 -14 -11 255.521 198.847 5
 -2 14 -12 -24.3682 72.772 2
 -2 -14 -12 121.071 132.937 5
 2 15 -13 -38.7178 96.0271 2
 2 15 -12 128.732 131.316 2
 2 -15 -12 106.246 184.373 3
 2 -15 -11 243.799 203.731 3
 2 15 -11 89.364 180.19 2
 2 15 -10 402.108 214.724 2
 2 -15 -10 879.594 330.779 3
 2 -15 -9 1285.01 384.486 3
 2 15 -9 749.737 259.196 2
 2 -15 -8 93.4703 91.2173 3
 2 15 -8 -242.219 146.904 2
 -2 -15 8 -87.8867 114.698 5
 -2 -15 7 1214.68 310.137 5
 2 15 -7 850.509 256.306 2
 2 -15 -7 969.247 308.097 3
 -2 -15 6 309.186 143.066 5
 2 15 -6 243.877 127.238 2
 2 -15 -6 379.901 175.588 3
 2 15 -5 2418.19 383.012 2
 2 -15 -5 2339.4 442.606 3
 -2 -15 5 2621.65 475.262 5
 2 15 -4 -40.4078 71.7229 2
 2 -15 -4 -69.299 81.1627 3
 -2 -15 4 -73.6606 86.1977 5
 2 15 -3 331.8 122.9 2
 2 -15 -3 222.678 150.174 3
 -2 -15 3 215.585 146.928 5
 2 -15 -2 3152.31 455.625 3
 -2 -15 2 3547.77 432.936 4
 -2 -15 2 3190.26 541.023 5
 -2 -15 1 668.525 199.794 4
 2 -15 -1 924.804 230.874 3
 -2 -15 1 635.411 239.171 5
 2 -15 0 4397.72 492.511 3
 -2 -15 0 5402.06 719.329 5
 -2 -15 -1 1516.47 388.794 5
 2 -15 2 1641.95 375.198 5
 -2 -15 -2 1538.06 390.049 5
 2 -15 3 354.448 173.776 5
 -2 -15 -3 501.711 238.796 5
 -2 15 -3 123.752 74.0292 2
 -2 -15 -4 402.86 205.994 5
 2 -15 4 811.385 254.872 5
 -2 15 -4 478.66 166.668 2
 -2 15 -5 239.895 132.324 2
 2 -15 5 705.7 241.222 5
 -2 -15 -5 378.958 193.444 5
 -2 -15 -6 737.957 300.765 5
 2 -15 6 319.258 149.581 5
 -2 15 -6 330.855 131.157 2
 -2 -15 -7 87.4487 120.67 5
 -2 15 -7 164.299 127.05 2
 -2 15 -8 1114.75 326.505 2
 -2 -15 -8 1574.59 429.747 5
 -2 15 -9 140.491 138.26 2
 -2 -15 -9 144.05 121.918 5
 -2 15 -10 89.9288 128.278 2
 -2 -15 -10 119.851 168.459 5
 -2 -15 -11 212.008 176.901 5
 -2 15 -11 162.159 150.324 2
 -2 -15 -12 964.989 365.953 5
 -2 15 -12 488.642 263.306 2
 2 16 -12 -130.989 132.806 2
 2 -16 -11 1301.34 420.981 3
 2 16 -11 1326.84 378.024 2
 2 -16 -10 566.137 273.702 3
 2 16 -10 659.574 244.21 2
 2 16 -9 137.18 121.278 2
 2 -16 -9 221.66 202.433 3
 2 -16 -8 -21.5632 122.278 3
 -2 -16 8 213.291 123.991 5
 -2 -16 7 1274.62 327.692 5
 2 16 -7 786.627 244.014 2
 2 -16 -7 861.522 310.98 3
 2 16 -6 2384.4 411.062 2
 2 -16 -6 2162.73 463.253 3
 -2 -16 6 2138.5 436.545 5
 2 16 -5 1935.41 351.269 2
 2 -16 -5 1682.16 393.173 3
 -2 -16 5 1496.45 389.096 5
 -2 -16 4 -101.794 124.77 5
 2 -16 -4 31.583 54.8634 3
 2 -16 -3 62.8965 101.012 3
 -2 -16 3 -38.4067 105.012 5
 2 -16 -2 356.907 162.892 3
 -2 -16 2 492.161 227.472 5
 -2 -16 1 466.731 172.573 4
 2 -16 -1 538.376 185.364 3
 -2 -16 1 499.851 235.471 5
 -2 -16 0 134.808 103.297 4
 -2 -16 0 186.33 141.843 5
 2 -16 1 -8.06008 103.647 5
 -2 -16 -1 -40.4466 101.315 5
 -2 -16 -2 131.936 163.005 5
 2 -16 2 23.4921 96.4256 5
 -2 -16 -3 426.693 229.006 5
 2 -16 3 240.982 167.711 5
 -2 -16 -4 116.361 138.648 5
 2 -16 4 358.366 172.783 5
 -2 16 -4 232.369 113.155 2
 2 -16 5 141.857 129.252 5
 -2 -16 -5 38.853 102.888 5
 -2 16 -5 118.324 81.0093 2
 -2 -16 -6 530.025 252.901 5
 -2 16 -6 473.826 201.538 2
 -2 16 -7 43.0545 86.7912 2
 -2 -16 -7 379.446 250.514 5
 -2 -16 -8 222.435 131.484 5
 -2 16 -8 -14.692 60.454 2
 -2 -16 -9 714.73 297.805 5
 -2 16 -9 393.221 206.261 2
 -2 -16 -10 366.377 252.149 5
 -2 16 -10 586.786 258.322 2
 -2 16 -11 -16.1821 65.7232 2
 -2 -16 -11 -119.846 136.55 5
 -2 -16 -12 124.049 168.365 5
 2 17 -12 428.255 232.825 2
 2 17 -11 778.906 318.196 2
 2 17 -10 179.397 120.95 2
 2 -17 -10 490.025 272.783 3
 2 -17 -9 -99.3304 129.231 3
 2 17 -9 189.531 142.21 2
 2 -17 -8 108.606 129.433 3
 2 17 -8 424.428 219.073 2
 -2 -17 8 111.532 78.0619 5
 2 17 -7 73.172 52.2443 2
 2 -17 -7 -46.9499 108.876 3
 -2 -17 7 -87.3078 99.0607 5
 2 -17 -6 339.305 189.587 3
 -2 -17 6 102.294 103.619 5
 -2 -17 5 -87.607 128.986 5
 2 -17 -5 -108.431 110.138 3
 2 -17 -4 683.117 243.749 3
 -2 -17 4 864.673 302.102 5
 2 -17 -3 -12.9518 97.003 3
 -2 -17 3 56.1901 100.611 5
 2 -17 -2 304.031 149.513 3
 -2 -17 2 343.188 218.358 5
 -2 -17 1 807.799 295.65 5
 -2 -17 0 798.762 309.838 5
 2 -17 0 566.02 228.803 5
 -2 -17 0 192.166 111.306 4
 -2 -17 -1 62.4524 99.9879 5
 2 -17 1 -155.137 192.407 5
 2 -17 2 99.5112 87.1059 5
 -2 -17 -2 451.134 283.222 5
 2 -17 3 2603.45 502.194 5
 -2 -17 -3 3054.48 601.97 5
 2 -17 4 14.4988 55.0304 5
 -2 -17 -4 45.3401 98.1543 5
 2 -17 5 525.897 231.864 5
 -2 -17 -5 244.642 148.379 5
 -2 -17 -6 -56.0676 108.34 5
 -2 17 -6 39.1512 95.5921 2
 -2 -17 -7 141.632 189.142 5
 -2 17 -7 -14.2137 115.499 2
 -2 -17 -8 1164.04 402.107 5
 -2 17 -8 795.912 288.422 2
 -2 -17 -9 -56.4016 141.895 5
 -2 17 -9 -82.2102 103.969 2
 -2 -17 -10 -111.24 138.828 5
 -2 17 -10 21.0577 107.705 2
 2 18 -11 17.8576 70.923 2
 2 -18 -10 52.1939 103.588 3
 2 18 -10 193.119 168.648 2
 2 -18 -9 126.869 166.202 3
 2 -18 -8 88.368 165.333 3
 2 -18 -7 375.257 236.357 3
 -2 -18 7 948.741 302.997 5
 2 -18 -6 23.1466 87.6643 3
 -2 -18 6 412.771 212.643 5
 2 -18 -5 -43.1872 123.353 3
 -2 -18 5 106.72 131.3 5
 2 -18 -4 154.914 137.227 3
 -2 -18 4 183.177 119.216 5
 2 -18 -3 1884.17 408.411 3
 -2 -18 3 1885.53 457.139 5
 -2 -18 2 865.575 334.434 5
 2 -18 -1 -75.8456 97.2135 5
 -2 -18 1 -153.55 185.137 5
 2 -18 0 41.1064 92.708 5
 -2 -18 0 -25.7055 140.541 5
 -2 -18 -1 621.607 240.637 4
 -2 -18 -1 1088.66 363.643 5
 2 -18 1 957.242 317.97 5
 -2 -18 -2 750.006 321.8 5
 2 -18 2 680.507 281.213 5
 -2 -18 -3 26.2068 77.4049 5
 2 -18 3 247.804 152.342 5
 2 -18 4 -138.096 128.555 5
 -2 -18 -4 -87.7071 132.502 5
 2 -18 5 637.758 258.665 5
 -2 -18 -5 1072.44 391.597 5
 -2 -18 -6 196.797 175.463 5
 -2 -18 -7 -268.752 197.694 5
 -2 18 -8 10.0975 55.5877 2
 -2 -18 -8 -64.6548 109.403 5
 -2 18 -9 74.7036 130.265 2
 -2 18 -10 292.77 214.784 2
 2 -19 -9 17.1625 73.4008 3
 2 -19 -8 786.352 331.633 3
 2 -19 -7 50.6547 100.913 3
 -2 -19 7 -181.695 143.41 5
 2 -19 -6 -72.4837 102.116 3
 -2 -19 6 -153.474 137.776 5
 2 -19 -5 257.897 185.374 3
 -2 -19 5 295.413 210.788 5
 2 -19 -4 767.611 283.571 3
 -2 -19 4 1126.2 360.699 5
 2 -19 -3 692.016 286.82 5
 -2 -19 3 401.838 192.578 5
 -2 -19 2 190.467 154.366 5
 2 -19 -2 -162.601 195.837 5
 -2 -19 1 148.046 174.742 5
 2 -19 -1 1.99376 66.4238 5
 -2 -19 0 3060.56 625.375 5
 2 -19 0 3601.09 662.742 5
 2 -19 1 130.252 131.931 5
 -2 -19 -1 400.749 221.959 5
 -2 -19 -2 720.952 313.122 5
 2 -19 2 648.423 287.206 5
 2 -19 3 687.048 279.409 5
 -2 -19 -3 161.4 147.222 5
 2 -19 4 1194.8 370.053 5
 -2 -19 -4 510.207 267.693 5
 -2 -19 -5 152.209 166.358 5
 -2 -19 -6 -152.154 162.357 5
 2 -20 -8 259.36 193.514 3
 2 -20 -7 279.97 194.377 3
 2 -20 -6 419.856 224.005 3
 -2 -20 6 511.696 235.097 5
 2 -20 -5 248.397 230.267 3
 -2 -20 5 266.541 184.805 5
 2 -20 -5 364.012 287.627 5
 -2 -20 4 74.0078 150.068 5
 2 -20 -4 218.144 233.007 5
 -2 -20 3 548.89 282.904 5
 2 -20 -3 819.231 354.616 5
 2 -20 -2 -263.984 267.586 5
 -2 -20 2 -127.985 83.7758 5
 2 -20 -1 114.714 69.9589 5
 -2 -20 1 38.8149 164.562 5
 2 -20 0 69.7972 85.8829 5
 -2 -20 0 85.5137 112.496 5
 -2 -20 -1 889.159 322.291 5
 2 -20 1 1783.23 479.343 5
 -2 -20 -2 -55.9824 69.3902 5
 2 -20 2 24.216 77.8847 5
 2 -20 3 326.004 208.255 5
 -2 -20 -3 -61.7466 135.205 5
 2 -20 4 634.918 283.995 5
 -2 -20 -4 1270.01 429.937 5
 2 -21 -7 84.4959 114.394 3
 -2 -21 6 239.617 176.736 5
 -2 -21 5 71.824 83.7591 5
 -2 -21 4 1403.74 438.688 5
 -2 -21 3 204.568 161.512 5
 -2 -21 2 374.522 231.272 5
 2 -21 -2 748.669 335.07 5
 -2 -21 1 124.458 150.443 5
 2 -21 -1 452.36 267.181 5
 2 -21 0 1838.89 518.405 5
 -2 -21 0 1886.6 533.071 5
 2 -21 1 -140.279 148.537 5
 2 -21 2 227.096 219.63 5
 2 -21 3 101.507 128.338 5
 3 0 -19 159.836 151.806 2
 3 0 -18 -157.72 140.856 2
 3 0 -17 993.879 303.756 2
 3 0 -16 84.6022 100.794 3
 3 0 -16 203.482 160.083 2
 3 0 -15 -104.822 125.292 2
 3 0 -15 302.747 148.656 3
 3 0 -14 20.8946 56.7028 2
 3 0 -14 2.72917 85.5099 3
 3 0 -13 1258.94 277.865 3
 3 0 -13 1018.66 265.733 2
 3 0 -12 -46.9657 114.962 2
 3 0 -11 12063.2 796.899 2
 3 0 -10 49.9456 83.1266 2
 -3 0 9 374.018 100.289 5
 3 0 -9 783.858 191.367 2
 -3 0 8 -10.5086 20.6533 5
 3 0 -8 -11.8417 22.5851 1
 -3 0 7 38.5823 35.8196 5
 3 0 -7 87.8438 37.9728 1
 3 0 -6 47.5405 24.2315 1
 -3 0 6 -12.5632 14.0373 5
 -3 0 5 13626.5 458.549 5
 -3 0 4 52.3696 28.5126 5
 -3 0 3 32630.7 660.082 5
 -3 0 2 2.97086 31.9017 5
 -3 0 0 14.6943 14.5422 5
 3 0 1 9323.91 338.721 5
 -3 0 -1 9249.85 314.58 5
 -3 0 -1 9814.34 436.859 4
 -3 0 -2 -19.4597 40.9425 4
 -3 0 -2 0.6621 17.789 5
 3 0 2 1.163 12.412 5
 -3 0 -3 2413.18 160.315 5
 3 0 3 2481.51 180.338 5
 -3 0 -3 3444.12 316.79 4
 -3 0 -4 -18.7837 52.3796 4
 -3 0 -4 1.83762 12.732 5
 -3 0 -4 -6.87494 26.8022 2
 3 0 5 5731.76 422.031 1
 -3 0 -5 5774.69 242.811 5
 -3 0 -5 5997.9 478.195 2
 -3 0 -6 8.33562 9.15435 5
 -3 0 -6 0.13238 31.4444 2
 3 0 6 -59.378 49.9082 1
 3 0 7 1614.17 255.011 1
 -3 0 -7 1568.47 104.334 5
 -3 0 -7 1643.11 128.982 5
 -3 0 -7 1762.41 294.855 2
 3 0 8 -73.2025 75.3699 1
 -3 0 -8 0.68329 5.70748 5
 -3 0 -8 -16.6413 13.3825 5
 -3 0 -8 -91.8481 78.1376 2
 3 0 9 1565.65 275.601 1
 -3 0 -9 1590.98 324.436 2
 3 0 10 128.726 103.956 1
 -3 0 -10 93.293 53.7897 2
 3 0 11 5934.91 563.773 1
 -3 0 -11 5314.09 625.637 2
 3 0 12 52.9946 71.1567 1
 -3 0 -12 -32.3719 137.285 2
 3 0 13 99.6964 92.197 1
 -3 0 -13 293.632 171.555 2
 3 0 14 57.8221 84.2936 1
 -3 0 -14 -80.6453 89.9757 2
 3 0 15 2290.04 392.619 1
 -3 0 -15 2300.26 487.057 2
 -3 0 -16 -39.2545 109.653 2
 -3 0 -17 -10.9811 55.9093 2
 3 -1 -19 458.97 234.85 2
 3 -1 -18 100.387 108.614 2
 3 1 -18 196.597 155.515 2
 3 1 -17 99.2368 99.5401 2
 3 -1 -17 243.702 169.462 2
 3 -1 -16 1401.26 357.849 2
 3 1 -16 2230.95 456.948 2
 3 -1 -16 2441.08 463.588 3
 3 1 -15 678.25 219.094 3
 3 1 -15 552.942 209.548 2
 3 -1 -15 760.605 255.551 2
 3 -1 -15 950.388 281.006 3
 3 1 -14 -60.7925 62.3966 2
 3 -1 -14 -41.69 65.9239 3
 3 -1 -14 123.414 138.882 2
 3 1 -14 -11.2219 38.6829 3
 3 1 -13 112.643 106.269 3
 3 -1 -13 -41.6073 76.6742 3
 3 -1 -13 -118.407 147.18 2
 3 1 -13 -29.6438 73.1656 2
 3 1 -12 14578.4 960.005 2
 3 -1 -12 12951.2 866.611 2
 -3 -1 11 240.497 78.9358 5
 3 -1 -11 244.765 97.9245 2
 3 1 -11 120.996 102.022 2
 3 -1 -10 9.48674 40.5858 2
 3 1 -10 126.073 105.654 2
 -3 -1 9 33.9233 40.9509 5
 3 1 -9 -24.0019 61.4812 2
 3 -1 -9 112.584 82.9807 2
 -3 -1 8 8250.1 398.611 5
 -3 1 8 8343.79 444.545 5
 -3 -1 7 18787.2 577.522 5
 -3 1 7 19425.1 641.278 5
 3 -1 -7 17211.8 533.213 1
 -3 -1 6 370.908 79.3843 5
 -3 1 6 466.868 95.6917 5
 3 1 -6 345.368 53.5797 1
 3 1 -5 303.72 39.1871 1
 -3 1 5 235.984 63.8501 5
 -3 -1 5 217.186 57.5573 5
 -3 -1 4 80005 1093.38 5
 -3 1 4 80048.5 1088.95 5
 -3 -1 3 71286.5 1026.8 5
 -3 1 3 72999.6 981.512 5
 -3 1 2 27645 570.745 5
 -3 -1 2 26456.5 623.31 5
 -3 -1 1 11521 407.652 5
 -3 1 1 11516.2 346.199 5
 -3 1 0 17920.5 403.556 5
 -3 -1 0 17804.5 506.051 5
 -3 -1 -1 158.122 61.2528 4
 3 -1 1 223.273 46.1582 5
 -3 1 -1 249.806 45.2736 5
 -3 -1 -1 221.261 59.1468 5
 3 1 1 218.977 57.3222 5
 -3 -1 -2 1195.53 135.108 5
 -3 1 -2 1239.22 90.9385 5
 3 -1 2 1171.04 103.199 5
 -3 1 -2 1411.07 166.815 4
 3 1 2 1467.74 156.675 5
 -3 -1 -2 1410.78 193.041 4
 3 -1 2 1411.45 174.162 4
 -3 -1 -3 807.153 159.057 4
 3 -1 3 681.693 77.642 5
 -3 1 -3 642.412 59.3945 5
 3 1 3 621.034 103.877 5
 -3 -1 -3 521.926 90.9104 5
 -3 1 -3 628.393 117.802 4
 -3 1 -4 901.999 62.483 5
 -3 1 -4 912.504 157.926 4
 -3 -1 -4 1020.27 130.608 5
 -3 1 -4 993.478 179.759 2
 -3 1 -5 698.733 154.645 4
 -3 -1 -5 876.425 124.559 5
 -3 1 -5 819.884 178.966 2
 -3 -1 -5 1069.35 197.009 2
 3 1 6 42.6662 59.1475 1
 -3 1 -6 71.3003 61.0177 4
 3 -1 6 165.409 76.9633 1
 -3 -1 -6 218.071 67.0498 5
 -3 -1 -6 163.794 90.2978 2
 -3 1 -6 225.7 88.0264 2
 3 1 7 1194.77 217.915 1
 -3 -1 -7 1117.46 143.986 5
 3 -1 7 1316.58 226.327 1
 -3 -1 -7 969.339 210.493 2
 -3 1 -7 1234.71 251.54 2
 -3 1 -8 62.4675 63.0025 2
 3 1 8 97.5595 33.3058 1
 -3 -1 -8 138.504 115.319 2
 -3 -1 -8 188.715 62.5365 5
 3 -1 8 150.933 79.8992 1
 -3 1 -9 1553.25 326.15 2
 3 -1 9 2155.41 320.017 1
 -3 -1 -9 2083.99 196.875 5
 3 1 9 1883.46 299.225 1
 -3 -1 -9 2173.31 351.668 2
 3 1 10 5089.88 510.539 1
 -3 1 -10 5615.23 630.315 2
 3 -1 10 5396.32 520.754 1
 -3 -1 -10 4768.11 555.677 2
 3 1 11 3366.93 424.666 1
 -3 -1 -11 3575.84 503.444 2
 3 -1 11 3848.33 458.715 1
 -3 1 -11 4222.28 571.552 2
 3 1 12 -16.1207 44.5543 1
 -3 1 -12 157.335 131.142 2
 -3 -1 -12 -6.56924 107.59 2
 3 -1 12 22.8859 56.8177 1
 3 1 13 716.494 204.669 1
 3 -1 13 668.866 214.907 1
 -3 -1 -13 802.467 264.009 2
 -3 1 -13 1040.43 297.818 2
 -3 -1 -14 506.67 215.433 2
 -3 1 -14 188.689 106.08 2
 3 1 14 459.435 177.778 1
 3 -1 14 563.914 186.425 1
 -3 1 -15 -23.779 86.3868 2
 3 -1 15 18.3161 42.5466 1
 -3 -1 -16 -51.8826 84.3298 2
 -3 1 -16 287.099 200.409 2
 3 -2 -18 1312.15 367.631 2
 3 2 -18 1242.23 370.959 2
 3 2 -17 850.868 299.626 2
 3 -2 -17 878.658 294.589 2
 3 -2 -17 619.3 246.112 3
 3 2 -16 126.326 121.326 2
 3 -2 -16 242.127 157.392 2
 3 -2 -16 330.695 187.5 3
 3 -2 -15 -19.8525 56.1053 2
 3 2 -15 114.181 79.5305 2
 3 -2 -14 11271.2 923.325 3
 3 2 -14 11148.6 820.98 3
 3 -2 -14 10219.1 856.509 2
 3 2 -14 11824.2 970.497 2
 3 -2 -13 32.6404 65.0319 3
 3 -2 -13 -49.6915 71.9925 2
 3 2 -13 -2.6866 82.865 2
 3 2 -13 132.94 92.8354 3
 3 2 -12 4927.88 569.301 2
 3 -2 -12 4968.37 557.889 3
 -3 -2 12 4755.49 353.6 5
 3 -2 -12 5021.97 529.722 2
 -3 -2 11 4589.31 334.323 5
 3 2 -11 4829.89 526.732 2
 3 -2 -11 5263.46 504.367 2
 -3 -2 10 13534.8 544.989 5
 3 2 -10 13650.8 835.743 2
 3 -2 -10 13046.3 742.662 2
 3 2 -9 15818.7 832.119 2
 3 -2 -9 15409.8 747.236 2
 -3 -2 9 15435 558.491 5
 -3 -2 8 9593.04 428.364 5
 3 2 -8 9975.65 620.369 2
 -3 -2 7 8261.35 388.267 5
 -3 -2 6 217.538 58.8605 5
 -3 2 6 157.073 56.1942 5
 -3 -2 5 1615.69 171.527 5
 -3 2 5 1335.03 164.349 5
 -3 -2 4 4892.78 296.713 5
 -3 2 4 4505.87 281.046 5
 -3 -2 3 2509.6 212.39 5
 -3 2 3 2575.14 197.731 5
 -3 2 2 43146.8 760.918 5
 -3 -2 2 43248.2 886.38 5
 3 2 -2 43873.7 580.315 1
 -3 2 1 3756.98 207.632 5
 -3 -2 1 3770.3 264.693 5
 -3 2 0 6015.33 245.055 5
 -3 -2 0 6371.74 349.955 5
 -3 -2 0 5791.22 356.361 4
 -3 2 -1 4221.82 187.568 5
 -3 -2 -1 4228.28 289.677 5
 3 -2 1 4082.61 188.536 5
 -3 -2 -1 4367.85 336.909 4
 -3 2 -2 16634.1 334.417 5
 3 -2 2 15965.7 345.696 5
 3 -2 2 14908 528.187 4
 -3 -2 -2 17067.6 592.725 5
 3 2 2 15805.4 585.626 5
 -3 -2 -2 16401.1 700.69 4
 -3 -2 -3 5441.27 342.513 5
 3 -2 3 4854.44 177.863 5
 -3 2 -3 4974.16 160.928 5
 -3 2 -3 4927.61 313.812 4
 -3 2 -3 5255.85 408.811 2
 -3 2 -4 2343.63 295.042 2
 -3 -2 -4 2385.03 231.896 5
 -3 2 -4 2540.63 248.2 4
 -3 -2 -5 10564.9 498.255 5
 -3 2 -5 11531.6 694.855 2
 -3 2 -5 10709.8 552.259 4
 -3 2 -6 17.39 43.9855 2
 -3 -2 -6 -11.31 36.4821 2
 -3 2 -6 11.3533 38.1727 4
 3 2 6 47.0503 49.2315 1
 -3 -2 -6 -82.9734 46.7218 5
 3 2 7 6372.7 508.545 1
 -3 2 -7 6447.76 597.255 2
 -3 -2 -7 6175.28 399.391 5
 -3 -2 -7 6001.92 517.188 2
 -3 2 -7 5719.35 467.678 4
 -3 2 -8 489.937 183.923 2
 3 2 8 666.175 171.558 1
 -3 -2 -8 578.175 123.218 5
 3 -2 8 598.989 162.941 1
 -3 -2 -8 745.198 185.919 2
 -3 2 -8 681.722 171.406 4
 3 2 9 7514.85 592.438 1
 -3 2 -9 6239.75 643.965 2
 3 -2 9 6232.29 539.489 1
 -3 -2 -9 6894.37 428.193 5
 -3 -2 -9 7113.46 630.008 2
 -3 2 -9 7306.65 595.342 4
 -3 2 -10 1703.58 349.824 2
 -3 2 -10 1802.97 310.666 4
 3 2 10 1939.91 311.202 1
 -3 -2 -10 1725.31 331.049 2
 3 -2 10 1525.33 266.385 1
 -3 2 -11 875.63 240.526 2
 -3 2 -11 1600.12 305.427 4
 3 -2 11 1210.95 254.548 1
 3 2 11 907.871 225.562 1
 -3 -2 -11 1391.59 315.563 2
 3 -2 12 31.9189 69.6704 1
 3 2 12 -59.141 73.6817 1
 -3 -2 -12 6.10902 113.828 2
 -3 2 -12 -44.9148 98.0558 2
 3 -2 13 243.343 128.647 1
 -3 -2 -13 106.653 74.0762 2
 -3 2 -13 167.668 149.874 2
 3 -2 14 -75.8744 114.937 1
 -3 -2 -14 -21.6115 60.5077 2
 -3 2 -14 -71.5414 110.047 2
 -3 -2 -15 200.334 159.296 2
 -3 2 -15 19.6044 71.9462 2
 -3 2 -16 712.379 284.018 2
 3 -3 -18 166.431 149.211 3
 3 3 -18 -175.273 155.463 2
 3 3 -17 104.961 54.3868 2
 3 -3 -17 44.9764 80.1384 3
 3 -3 -17 133.1 78.7611 2
 3 -3 -16 152.48 123.676 3
 3 -3 -16 -39.8414 109.663 2
 3 3 -16 -14.0263 68.8321 2
 3 3 -15 1612 386.799 2
 3 -3 -15 1193.64 293.681 2
 3 -3 -15 1116.14 325.638 3
 3 3 -14 201.458 158.444 2
 3 -3 -14 240.935 153.595 2
 3 -3 -14 112.35 90.2858 3
 3 -3 -13 657.325 223.219 3
 3 3 -13 399.924 180.656 2
 3 -3 -13 350.35 121.273 2
 3 3 -13 625.746 178.342 3
 3 -3 -12 1375.48 279.865 2
 -3 -3 12 989.614 155.713 5
 3 -3 -12 1252.13 294.227 3
 3 3 -12 1079.01 282.367 2
 -3 -3 11 822.748 138.084 5
 3 -3 -11 562.288 158.076 2
 3 3 -11 704.707 207.636 2
 -3 -3 10 207.943 65.8058 5
 3 3 -10 175.969 100.578 2
 3 -3 -10 274.681 110.369 2
 -3 -3 9 230.897 75.3328 5
 3 -3 -9 189.923 91.9671 2
 3 3 -9 227.418 115.884 2
 -3 -3 8 1963.2 197.902 5
 3 3 -8 2018.05 291.009 2
 -3 -3 7 31200.3 785.924 5
 -3 -3 6 1103.21 150.896 5
 -3 -3 5 14605.3 543.98 5
 -3 -3 4 143.576 57.4652 5
 -3 -3 3 7902.08 417.813 5
 -3 -3 3 8103.78 219.717 1
 -3 -3 2 57191.2 1140.13 5
 -3 -3 2 57664.8 740.182 1
 -3 -3 1 95963 1118.6 1
 -3 -3 1 98133.9 1511.52 5
 3 3 -1 96710.6 1075.76 1
 -3 -3 1 96525.3 1430.52 4
 -3 -3 0 3311.04 233.254 1
 -3 -3 0 3605.58 301.878 5
 3 -3 0 2790.19 182.281 5
 -3 -3 0 3514.5 300.227 4
 -3 -3 -1 80987.2 1444.43 5
 3 -3 1 84607.7 912.085 5
 -3 -3 -1 80359.4 1548.28 4
 3 -3 2 14656 344.219 5
 3 -3 2 14214.2 482.785 4
 -3 -3 -2 14467.5 699.331 4
 -3 -3 -2 14332.9 610.921 5
 3 -3 3 6507.44 201.126 5
 -3 -3 -3 6423.87 421.242 5
 3 -3 3 6581.93 354.256 4
 -3 3 -3 6548.91 467.416 2
 -3 -3 -4 25854.9 849.643 5
 -3 3 -4 26812.1 1025.18 2
 -3 3 -4 26916.6 730.641 4
 -3 -3 -5 4299.1 357.533 5
 -3 3 -5 4160.3 434.526 2
 -3 3 -5 4499.93 325.505 4
 -3 3 -6 5833.7 552.558 2
 -3 3 -6 5733.12 401.474 4
 -3 -3 -6 5894.45 427.466 5
 -3 3 -7 407.959 159.695 2
 3 3 7 378.075 126.849 1
 -3 3 -7 449.612 118.158 4
 -3 -3 -7 611.291 138.49 5
 3 3 8 1429.9 247.781 1
 -3 3 -8 1142.76 206.25 4
 -3 -3 -8 975.395 180.512 5
 -3 -3 -8 1032.91 224.145 2
 -3 3 -8 977.22 238.145 2
 3 3 9 1011.2 213.143 1
 -3 -3 -9 734.287 161.257 5
 -3 3 -9 1029.07 209.785 4
 3 -3 9 838.464 195.962 1
 -3 3 -9 689.056 199.504 2
 -3 -3 -9 789.568 207.436 2
 3 -3 10 3532.32 417.832 1
 -3 -3 -10 3650.31 460.11 2
 -3 3 -10 4548.96 582.417 2
 3 3 10 4194.93 463.564 1
 -3 3 -10 3586.85 414.897 4
 -3 3 -11 1439.87 341.322 2
 3 -3 11 992.626 232.251 1
 -3 3 -11 1104.46 235.314 4
 -3 -3 -11 711.806 225.906 2
 3 3 11 1395.7 278.793 1
 -3 3 -12 151.179 103.321 2
 3 -3 12 23.1626 46.4988 1
 -3 -3 -12 163.678 136.426 2
 3 -3 13 72.5129 85.4493 1
 -3 -3 -13 -56.6877 57.9758 2
 -3 3 -13 -65.8999 134.134 2
 -3 -3 -14 454.291 203.931 2
 -3 3 -14 265.982 176.564 2
 3 -3 14 410.734 166.74 1
 -3 3 -15 -27.2945 71.8176 2
 -3 3 -16 302.835 167.029 2
 3 4 -18 -178.214 236.607 2
 3 -4 -18 52.3493 104.325 3
 3 4 -17 897.914 320.996 2
 3 -4 -17 83.5596 109.692 3
 3 4 -16 -96.0904 114.007 2
 3 -4 -16 163.19 184.187 3
 3 -4 -16 246.124 151.63 2
 3 -4 -15 27.0388 93.1644 3
 3 -4 -15 -34.58 63.4188 2
 3 4 -15 -76.4755 93.1645 2
 3 -4 -14 436.515 168.823 2
 3 -4 -14 595.653 231.603 3
 3 -4 -13 2152.67 356.777 2
 3 -4 -13 1808.97 375.287 3
 3 4 -13 1768.51 373.343 2
 3 -4 -12 45.4732 70.3377 3
 3 4 -12 45.6468 98.9359 2
 3 -4 -12 -32.7945 74.0911 2
 3 4 -12 -38.8204 52.23 3
 -3 -4 12 -1.95685 33.1385 5
 -3 -4 11 796.566 136.457 5
 3 -4 -11 763.758 182.131 2
 3 4 -11 967.438 246.191 2
 -3 -4 10 6220.2 289.73 1
 3 4 -10 5764.79 569.425 2
 -3 -4 10 6265.9 370.828 5
 3 -4 -10 6231.87 493.85 2
 -3 -4 9 -18.7612 36.7764 5
 -3 -4 9 2.89192 12.8499 1
 3 4 -9 -37.3352 56.6703 2
 3 -4 -9 18.3538 39.5599 2
 -3 -4 8 2333.74 225.41 5
 -3 -4 8 2536.54 147.329 1
 3 4 -8 3171.86 375.506 2
 -3 -4 7 3766.57 289.354 5
 -3 -4 7 3629.72 150.559 1
 -3 -4 6 33764.8 888.271 5
 -3 -4 5 32.7652 49.2568 5
 -3 -4 4 678.449 125.829 5
 3 4 -3 3967.84 278.944 4
 -3 -4 3 3943.46 178.076 1
 -3 -4 3 3987.4 325.966 5
 -3 -4 2 13611 622.895 5
 -3 -4 2 13422.5 392.395 1
 3 4 -2 14067.4 552.1 4
 -3 -4 1 42.757 22.5662 1
 -3 -4 1 84.0935 54.2956 4
 -3 -4 1 -8.94514 52.683 5
 3 -4 0 26010.7 620.214 5
 -3 -4 0 25424 870.834 5
 -3 -4 0 23988.4 830.797 4
 -3 -4 -1 791.124 153.757 5
 -3 -4 -1 810.407 165.125 4
 3 -4 1 678.462 93.6546 5
 3 -4 2 10487.7 334.422 5
 -3 4 -2 9961.32 550.448 2
 -3 -4 -2 10096.8 562.106 5
 3 -4 3 33.7951 30.2763 4
 3 -4 3 31.758 17.9608 5
 -3 -4 -3 0.29601 23.5795 5
 3 4 3 19.3106 25.1617 2
 -3 4 -3 11.3263 33.4266 2
 3 -4 4 3961.4 154.203 5
 -3 4 -4 4431.77 430.601 2
 -3 -4 -4 3886.94 362.38 5
 3 -4 5 2657.75 235.244 3
 -3 4 -5 2867.83 374.99 2
 -3 -4 -5 2606.39 302.872 5
 -3 -4 -6 3775.57 371.283 5
 -3 4 -6 3413.69 422.255 2
 -3 4 -6 3687.75 289.18 4
 -3 4 -7 633.965 133.15 4
 3 4 7 483.318 153.065 1
 -3 -4 -7 476.855 132.991 5
 -3 4 -7 384.612 140.665 2
 -3 4 -8 853.779 166.019 4
 -3 4 -8 782.527 218.689 2
 -3 -4 -8 734.092 170.973 5
 3 4 8 701.987 179.146 1
 -3 4 -9 1095.91 203.707 4
 -3 4 -9 1260.39 304.405 2
 3 4 9 1404.46 265.5 1
 -3 -4 -9 793.661 177.551 5
 3 -4 10 1684.24 290.596 1
 -3 4 -10 1441.75 344.008 2
 -3 -4 -10 1503.42 252.28 5
 -3 4 -10 1854.52 277.471 4
 -3 4 -11 1602.43 362.433 2
 3 -4 11 1456.22 286.524 1
 -3 4 -12 2253.15 459.233 2
 3 -4 12 2175.35 350.301 1
 3 -4 13 67.752 40.7284 1
 -3 4 -13 382.215 221.771 2
 -3 4 -14 -184.215 173.019 2
 -3 4 -15 269.469 164.367 2
 -3 4 -16 558.053 249.05 2
 3 -5 -18 231.824 152.273 3
 3 -5 -17 1170.38 372.407 3
 3 5 -17 660.407 275.362 2
 3 -5 -16 474.21 235.628 3
 3 5 -16 441.525 213.642 2
 3 -5 -15 -26.6698 54.5157 2
 3 5 -15 26.7505 66.5148 2
 3 -5 -14 115.831 88.1396 2
 3 -5 -14 32.008 109.507 3
 3 5 -14 -15.7495 78.8296 2
 3 5 -13 1039.78 315.358 2
 3 -5 -13 848.493 220.086 2
 3 -5 -13 1392.21 333.385 3
 3 -5 -12 2041.92 324.119 2
 -3 -5 12 2172.76 224.226 5
 3 5 -12 2401.36 415.421 2
 3 -5 -12 1880.08 373.6 3
 3 5 -11 163.606 80.9935 2
 -3 -5 11 306.982 85.0385 5
 -3 -5 11 315.626 70.5943 1
 3 -5 -11 381.696 140.364 2
 3 -5 -11 350.557 158.694 3
 -3 -5 10 533.627 85.7375 1
 -3 -5 10 543.99 111.563 5
 3 -5 -10 404.055 124.928 2
 3 5 -10 444.094 156.409 2
 -3 -5 9 13476.1 564.079 5
 3 -5 -9 12270.2 622.436 2
 -3 -5 9 12370.1 378.74 1
 3 5 -9 13580.5 844.656 2
 3 5 -8 4878.44 478.645 2
 -3 -5 8 4696.48 214.202 1
 -3 -5 8 5075.45 353.588 5
 3 5 -7 1032.36 209.751 2
 -3 -5 7 949.428 155.54 5
 -3 -5 6 -16.6431 44.0469 5
 -3 -5 5 2158.52 247.735 5
 -3 -5 4 6197.61 428.172 5
 3 5 -4 5836.18 342.143 4
 -3 -5 3 -7.44454 39.0396 5
 3 5 -3 -7.33314 17.0339 4
 -3 -5 2 759.103 158.621 5
 -3 -5 2 894.462 143.928 4
 -3 -5 1 5976.88 448.53 5
 -3 -5 1 6070.64 407.467 4
 -3 -5 0 38224 1156.08 5
 -3 -5 0 40436.4 1140.2 4
 -3 -5 -1 -6.48472 32.8896 5
 -3 5 -2 -15.0125 47.2241 2
 -3 -5 -2 2.00974 36.5434 5
 3 5 3 7679.32 398.882 2
 3 -5 3 7526.33 300.477 5
 3 -5 3 8204.3 347.122 4
 -3 -5 -3 8464.93 568.906 5
 -3 5 -3 8711.34 573.042 2
 3 -5 4 12116.2 334.473 5
 -3 5 -4 12094.5 728.322 2
 -3 -5 -4 11638.9 679.919 5
 -3 5 -5 23.8152 55.7228 2
 3 -5 5 79.2672 34.3536 3
 3 -5 5 70.0978 22.2528 5
 -3 -5 -5 28.5675 47.6963 5
 3 -5 5 53.5794 23.4697 5
 3 -5 6 16466 559.856 3
 -3 5 -6 18806.8 1025.65 2
 -3 -5 -6 16671.9 838.26 5
 -3 5 -7 428.622 165.972 2
 -3 -5 -7 267.922 109.023 5
 -3 5 -8 409.065 154.198 2
 -3 -5 -8 159.922 96.7903 5
 -3 5 -8 395.906 101.672 4
 -3 -5 -9 14182.5 823.038 5
 -3 5 -9 13224.6 991.332 2
 -3 5 -9 14586.1 656.027 4
 -3 5 -10 -52.1897 97.3991 2
 -3 -5 -10 49.1853 68.7137 5
 3 -5 11 87.0942 62.3408 1
 -3 5 -11 160.243 85.0779 2
 -3 5 -12 27.2325 91.8689 2
 3 -5 12 24.9423 57.194 1
 -3 5 -13 3243.88 583.76 2
 3 -5 13 2930.87 427.278 1
 -3 5 -14 396.501 233.17 2
 -3 5 -15 1729.39 447.192 2
 3 -6 -18 230.797 180.247 3
 3 6 -17 292.843 183.182 2
 3 -6 -17 197.833 173.012 3
 3 -6 -16 -82.2508 100.496 3
 3 6 -16 23.2266 98.5418 2
 3 -6 -15 1082.19 354.122 3
 3 6 -15 269.679 174.577 2
 3 -6 -14 1725.38 323.326 2
 3 -6 -14 1471.24 369.938 3
 3 6 -14 1813.56 410.562 2
 3 -6 -13 61.9368 85.4985 2
 3 6 -13 -92.5684 146.607 2
 3 -6 -13 27.3696 108.689 3
 3 -6 -12 102.633 77.085 2
 3 -6 -12 168.695 128.604 3
 3 6 -12 260.283 184.378 2
 3 6 -11 -32.5824 100.655 2
 3 -6 -11 125.815 86.8709 2
 -3 -6 11 -9.33693 33.633 5
 -3 -6 10 1896.76 166.367 1
 -3 -6 10 2038.94 225.807 5
 3 -6 -10 1954.86 263.178 2
 3 6 -10 2033.55 351.507 2
 -3 -6 9 745.107 97.2641 1
 -3 -6 9 701.87 138.982 5
 3 6 -9 821.915 216.131 2
 3 -6 -9 696.634 143.317 2
 3 -6 -8 337.644 92.7177 2
 -3 -6 8 229.995 85.3288 5
 3 6 -8 212.096 117.402 2
 -3 -6 7 1683.49 228.579 5
 3 6 -7 1492.96 253.661 2
 -3 -6 6 18184.5 764.389 5
 -3 -6 5 5001.48 409.46 5
 3 6 -5 5350.51 324.821 4
 3 6 -4 30.001 20.5351 4
 -3 -6 4 34.7788 34.3725 5
 -3 -6 3 6729.52 498.34 5
 3 6 -3 6179.57 389.107 4
 -3 -6 2 16155.1 780.248 5
 -3 -6 2 16205 647.421 4
 -3 -6 1 650.036 143.376 4
 -3 -6 1 788.592 175.95 5
 3 -6 -1 790.706 133.684 2
 -3 -6 0 2833.01 339.118 5
 -3 -6 0 2771.99 317.931 4
 -3 -6 -1 8542.14 593.685 5
 -3 -6 -2 19533.7 910.135 5
 -3 6 -2 18349.5 798.69 2
 -3 -6 -3 1827.54 285.29 5
 3 -6 3 1540.52 144.932 4
 -3 6 -3 1447.11 241.025 2
 3 6 3 1389.25 162.555 2
 3 6 4 11937 505.047 2
 -3 -6 -4 12531.3 756.718 5
 -3 6 -4 12196.3 752.652 2
 -3 6 -5 249.143 84.8491 2
 3 -6 5 325.25 58.181 5
 3 -6 5 326.215 66.1061 3
 -3 -6 -5 515.282 149.318 5
 3 -6 5 161.797 53.4354 5
 3 -6 6 1806.94 160.723 3
 3 -6 6 2287.31 160.004 5
 -3 -6 -6 3393.05 419.615 5
 -3 6 -6 3740.88 493.551 2
 -3 -6 -7 62.1201 50.1616 5
 -3 6 -7 90.3069 68.7683 2
 -3 -6 -8 4189.34 471.249 5
 -3 6 -8 4277.3 544.069 2
 -3 6 -9 1421.5 342.969 2
 -3 -6 -9 1294.63 271.356 5
 -3 6 -10 52.0189 95.2086 2
 -3 -6 -10 127.381 78.9822 5
 -3 6 -11 -31.1812 90.5262 2
 -3 6 -12 2608.07 519.717 2
 3 -6 12 2237.91 357.608 1
 -3 6 -13 220.752 131.674 2
 3 -6 13 -12.1545 34.2256 1
 -3 6 -14 1805.48 455.106 2
 -3 6 -15 169.279 171.694 2
 3 -7 -18 149.092 212.971 3
 3 7 -17 8.44888 110.039 2
 3 -7 -17 -261.906 188.125 3
 3 -7 -16 36.9391 51.9517 3
 3 7 -16 338.832 171.887 2
 3 -7 -15 645.481 304.026 3
 3 7 -15 405.565 195.823 2
 3 7 -14 31.8419 93.9894 2
 3 -7 -14 283.699 190.82 3
 3 7 -13 280.103 156.638 2
 3 -7 -13 351.486 218.422 3
 3 7 -12 71.9098 93.9505 2
 3 -7 -12 182.946 94.2841 2
 3 -7 -12 265.046 124.656 3
 3 -7 -11 12253.3 980.201 3
 -3 -7 11 11907.1 570.266 5
 3 7 -11 12277.2 934.952 2
 3 -7 -11 12360.4 697.12 2
 -3 -7 10 -46.5246 31.8822 1
 -3 -7 10 -9.58437 34.5795 5
 3 -7 -10 45.4216 29.7144 2
 3 7 -10 -23.5984 80.7068 2
 -3 -7 9 18.0831 42.8125 5
 3 -7 -9 9.49026 20.2844 2
 3 7 -9 73.8388 96.3556 2
 -3 -7 8 2107.65 264.506 5
 3 -7 -8 1965.29 209.346 2
 3 7 -8 2150.2 339.369 2
 -3 -7 7 12262.3 651.426 5
 3 7 -7 12724.1 753.08 2
 3 7 -7 11329.6 456.312 4
 -3 -7 6 742.854 166.612 5
 3 7 -6 607.761 108.032 4
 3 7 -6 1017.58 205.298 2
 -3 -7 5 -24.0122 61.8708 5
 3 7 -5 -7.01926 22.9134 4
 -3 -7 4 -214.883 95.9698 5
 -3 -7 3 15931 811.755 5
 -3 -7 2 15777.7 826.933 5
 3 -7 -2 14979.4 540.616 2
 -3 -7 2 15856 677.486 4
 -3 -7 1 100.344 58.2488 4
 -3 -7 1 120.35 64.0617 5
 -3 -7 0 172.706 71.7958 4
 -3 -7 0 110.446 45.5178 5
 -3 -7 -1 3345.57 400.674 5
 -3 -7 -2 12953 787.829 5
 -3 7 -2 13243.3 699.057 2
 3 7 3 64.7396 35.4378 2
 -3 7 -3 164.512 75.9047 2
 -3 -7 -3 89.6542 40.4548 5
 3 7 4 1224.45 156.588 2
 -3 -7 -4 960.037 220.759 5
 3 -7 4 1232.38 119.454 4
 -3 7 -4 1160.58 241.046 2
 -3 7 -5 -1.98167 40.5848 2
 3 -7 5 80.2007 36.8718 5
 3 -7 6 32.9828 18.3169 5
 3 -7 6 -0.16782 14.332 5
 -3 -7 -6 -46.5228 47.2572 5
 3 -7 7 2039.98 137.887 5
 -3 7 -7 2455.89 402.403 2
 -3 -7 -7 1930.42 332.692 5
 -3 7 -8 1478.29 319.73 2
 -3 -7 -8 1734.18 319.282 5
 -3 7 -9 548.422 183.95 2
 -3 -7 -9 918.239 235.865 5
 -3 7 -10 308.377 169.463 2
 -3 -7 -10 286.604 128.393 5
 -3 7 -11 955.708 299.548 2
 -3 7 -12 241.584 173.194 2
 3 -7 12 115.412 96.7287 1
 -3 7 -13 826.827 300.432 2
 -3 7 -14 -135.014 133.882 2
 -3 7 -15 33.3986 89.5867 2
 3 -8 -17 315.175 211.059 3
 3 8 -16 -139.988 136.539 2
 3 -8 -16 166.545 147.227 3
 3 8 -15 -68.2081 138.751 2
 3 -8 -15 -6.51666 112.021 3
 3 8 -14 813.764 302.634 2
 3 -8 -14 732.327 287.255 3
 3 -8 -13 893.13 303.466 3
 3 8 -13 667.81 249.868 2
 3 -8 -12 1594.78 404.236 3
 3 8 -12 581.599 203.261 2
 -3 -8 11 490.563 118.009 5
 3 -8 -11 427.795 152.332 3
 3 8 -11 721.153 248.114 2
 3 -8 -10 4193.87 573.903 3
 -3 -8 10 3765.14 351.03 5
 3 -8 -10 3614.63 335.386 2
 3 8 -10 4126.53 531.781 2
 3 -8 -9 363.59 148.116 3
 -3 -8 9 376.978 113.039 5
 3 -8 -9 322.979 90.3326 2
 3 8 -9 293.207 126.154 2
 -3 -8 8 43.1009 33.3912 5
 3 -8 -8 -4.23521 16.7592 2
 3 8 -8 88.7972 117.79 2
 3 8 -7 491.438 151.218 2
 -3 -8 7 389.373 123.082 5
 3 8 -7 531.439 98.9486 4
 3 8 -6 1212.93 227.139 2
 -3 -8 6 972.817 201.625 5
 3 8 -6 1182.94 156.452 4
 -3 -8 5 2440.33 327.203 5
 3 8 -5 2480.48 304.098 2
 -3 -8 4 1991.26 298.742 5
 -3 -8 3 14318.4 829.361 5
 3 -8 -3 13652.3 481.491 2
 -3 -8 3 14460.4 627.082 4
 3 -8 -2 8632.59 418.147 2
 -3 -8 2 8757.74 658.668 5
 -3 -8 2 8247.49 514.003 4
 -3 -8 1 3855.94 440.249 5
 -3 -8 1 4113.03 391.405 4
 -3 -8 0 20664.3 1046.3 5
 -3 -8 0 18184.2 882.865 4
 -3 -8 -1 2717.54 385.121 5
 -3 -8 -2 11458.1 792.872 5
 -3 8 -2 11636.2 675.557 2
 -3 -8 -3 2403.8 361.831 5
 3 8 3 1868.61 169.688 2
 -3 8 -3 2114.57 307.297 2
 -3 -8 -4 6721.39 626.17 5
 3 8 4 6499.67 337.978 2
 -3 8 -4 7188.13 613.225 2
 3 -8 4 6417.85 251.156 4
 -3 8 -5 492.447 166.314 2
 3 -8 5 517.911 120.153 5
 -3 -8 -5 412.59 172.906 5
 -3 8 -6 716.241 217.185 2
 3 -8 6 1551.1 195.416 5
 -3 -8 -6 1249.27 264.464 5
 3 -8 7 332.428 77.4532 5
 -3 8 -7 142.964 126.663 2
 -3 -8 -7 309.547 140.109 5
 -3 8 -8 -10.6919 51.3798 2
 -3 -8 -8 -28.0407 50.2295 5
 -3 8 -9 857.409 255.801 2
 -3 -8 -9 481.366 188.279 5
 -3 8 -10 92.5068 87.2252 2
 -3 -8 -10 -46.824 83.0026 5
 -3 8 -11 351.065 193.641 2
 -3 -8 -11 758.074 231.267 5
 -3 8 -12 109.699 153.325 2
 -3 8 -13 184.609 203.237 2
 -3 8 -14 115.594 117.221 2
 3 -9 -16 287.879 193.381 3
 3 9 -16 249.279 165.64 2
 3 9 -15 1350.09 378.221 2
 3 -9 -15 1575.07 441.623 3
 3 9 -14 608.648 240.601 2
 3 -9 -14 947.886 333.172 3
 3 -9 -13 1735.1 433.364 3
 3 9 -13 1060.36 317.966 2
 3 -9 -12 124.833 109.482 3
 3 9 -12 318.803 200.576 2
 -3 -9 11 4161.36 374.012 5
 3 -9 -11 4127.65 604.782 3
 3 9 -11 4001.79 565.428 2
 -3 -9 10 4541.8 413.8 5
 3 9 -10 4998.1 601.246 2
 3 -9 -10 4896.49 638.818 3
 -3 -9 9 2694.85 329.836 5
 3 -9 -9 2716.66 458.553 3
 3 9 -9 2393.81 392.016 2
 3 9 -8 65.2879 78.8531 2
 -3 -9 8 27.2121 32.7161 5
 3 -9 -8 -23.6431 62.6146 3
 3 -9 -8 27.691 21.9226 2
 -3 -9 7 2039.33 298.348 5
 3 -9 -7 1931.21 158.688 2
 3 9 -7 1960.67 316.445 2
 -3 -9 6 580.762 170.908 5
 3 9 -6 622.294 174.558 2
 3 9 -5 268.256 97.395 2
 -3 -9 5 349.459 125.048 5
 -3 -9 4 51134.7 1622.27 5
 3 -9 -4 46390 809.414 2
 3 9 -4 50695.6 1322.49 2
 -3 -9 3 2610.16 283.979 4
 -3 -9 3 2751.16 385.534 5
 3 -9 -3 2404.22 204.254 2
 -3 -9 2 155.575 72.9472 4
 3 -9 -2 129.111 49.4064 2
 -3 -9 2 148.618 89.6406 5
 -3 -9 1 2009.93 345.195 5
 -3 -9 1 2222.67 304.22 4
 -3 -9 0 2367.11 343.491 4
 -3 -9 0 2059.85 385.74 5
 -3 -9 -1 4169.72 501.48 5
 -3 -9 -2 -8.22373 52.1147 5
 -3 9 -2 -17.4937 34.4591 2
 -3 9 -3 1197.24 255.98 2
 3 9 3 704.155 100.179 2
 -3 -9 -3 1519.14 337.566 5
 -3 -9 -4 3249.03 458.179 5
 3 9 4 2965.12 207.664 2
 -3 9 -4 3139.7 411.06 2
 3 -9 4 2635.69 149.116 4
 -3 9 -5 112.312 78.7517 2
 3 -9 5 -16.431 58.5418 5
 -3 -9 -5 -10.6264 73.619 5
 -3 9 -6 828.48 244.939 2
 3 -9 6 478.505 123.313 5
 -3 -9 -6 747.84 225.069 5
 -3 -9 -7 246.636 138.575 5
 -3 9 -7 -128.919 124.001 2
 -3 -9 -8 3860.41 537.15 5
 -3 9 -8 3419.17 508.818 2
 -3 9 -9 1001.15 301.839 2
 -3 -9 -9 903.896 270.843 5
 -3 9 -10 495.911 214.781 2
 -3 -9 -10 506.099 199.689 5
 -3 -9 -11 1359.16 328.536 5
 -3 9 -11 1560.7 405.448 2
 -3 9 -12 303.054 225.82 2
 -3 9 -13 644.603 295.803 2
 -3 9 -14 181.027 169.65 2
 3 -10 -16 -301.425 211.512 3
 3 10 -15 325.247 210.52 2
 3 -10 -15 29.0802 131.646 3
 3 10 -14 479.549 229.133 2
 3 -10 -14 842.718 334.924 3
 3 -10 -13 182.015 192.979 3
 3 10 -13 -14.7035 89.6916 2
 3 -10 -12 48.7139 77.6304 3
 3 10 -12 115.006 105.864 2
 3 -10 -11 70.2386 134.236 3
 3 10 -11 -81.405 150.511 2
 -3 -10 10 3625.93 387.667 5
 3 -10 -10 3292.06 534.346 3
 3 10 -10 2873.18 464.096 2
 -3 -10 9 9309.19 647.936 5
 3 -10 -9 8741.46 837.346 3
 3 10 -9 8822.75 773.278 2
 3 10 -8 4988.49 554.071 2
 -3 -10 8 5179.19 499.408 5
 3 -10 -8 5729.11 652.255 3
 -3 -10 7 3152.2 400.818 5
 3 -10 -7 3328.31 480.795 3
 3 10 -7 3254.53 422.99 2
 3 10 -6 8904.3 659.643 2
 3 -10 -6 8392.07 234.716 2
 -3 -10 6 8546.7 672.296 5
 -3 -10 5 11048.6 779.299 5
 3 10 -5 11178.4 687.782 2
 3 -10 -5 9347.42 295.507 2
 3 -10 -4 5215.88 256.706 2
 -3 -10 4 5835.69 584.545 5
 3 10 -4 5946.08 467.345 2
 -3 -10 3 742.627 156.318 4
 3 -10 -3 699.652 108.266 2
 -3 -10 3 956.276 241.902 5
 3 10 -3 905.027 170.555 2
 -3 -10 2 14754.8 947.8 5
 -3 -10 2 13553.8 734.865 4
 -3 -10 1 2938 426.31 5
 -3 -10 1 2439.68 337.623 4
 -3 -10 0 682.002 207.157 5
 -3 -10 0 552.253 166.389 4
 -3 -10 -1 1056.69 260.165 5
 -3 -10 -2 3569.11 493.348 5
 -3 10 -2 3361.72 377.311 2
 3 -10 3 51.8817 33.9071 3
 -3 -10 -3 71.6997 113.836 5
 3 10 3 41.995 25.1485 2
 -3 10 -3 4.83829 64.936 2
 3 -10 4 138.056 36.086 3
 -3 10 -4 117.053 79.1188 2
 3 -10 5 295.441 109.702 5
 -3 -10 -5 217.889 108.128 5
 -3 10 -5 267.556 151.095 2
 -3 10 -6 469.463 201.748 2
 -3 -10 -6 575.072 217.425 5
 3 -10 6 542.556 137.742 5
 -3 10 -7 3263.55 482.984 2
 -3 -10 -7 3556.55 525.192 5
 -3 10 -8 1087.87 297.507 2
 -3 -10 -8 823.752 247.632 5
 -3 10 -9 -23.0869 61.5384 2
 -3 -10 -9 -51.9387 80.4896 5
 -3 10 -10 696.966 290.372 2
 -3 -10 -10 376.998 184.738 5
 -3 10 -11 1954.55 451.077 2
 -3 -10 -11 1728.2 381.913 5
 -3 10 -12 769.435 295.192 2
 -3 10 -13 220.281 127.909 2
 3 -11 -15 -122.195 182.066 3
 3 11 -15 49.0687 97.8983 2
 3 11 -14 24.1742 97.3075 2
 3 -11 -14 571.865 272.917 3
 3 11 -13 -40.7724 120.553 2
 3 -11 -13 109.129 104.02 3
 3 11 -12 1418.64 360.341 2
 3 -11 -12 944.381 317.979 3
 3 -11 -11 309.753 197.798 3
 3 11 -11 66.7189 105.326 2
 -3 -11 10 7.92836 52.3245 5
 3 -11 -10 -4.31966 61.9587 3
 3 11 -10 -16.3057 87.8449 2
 3 11 -9 519.314 179.61 2
 -3 -11 9 930.838 221.681 5
 3 -11 -9 1220.47 334.327 3
 -3 -11 8 6975.06 606.363 5
 3 -11 -8 7785.26 792.098 3
 3 11 -8 7869.27 715.691 2
 3 -11 -7 209.582 135.661 3
 3 11 -7 34.0162 63.0242 2
 -3 -11 7 273.178 112.029 5
 -3 -11 6 14915 944.378 5
 3 -11 -6 15558 1021.83 3
 3 11 -6 15545.1 904.329 2
 3 -11 -5 4005.75 496.003 3
 3 11 -5 4209.31 436.165 2
 -3 -11 5 4092.68 507.666 5
 -3 -11 4 16268.4 1026.76 5
 3 11 -4 16167.7 810.425 2
 -3 -11 3 2705.49 420.351 5
 3 -11 -3 2442.29 199.144 2
 3 11 -3 2762.65 310.526 2
 -3 -11 3 2357.32 291.451 4
 -3 -11 2 3860.66 516.913 5
 3 11 -2 3121.28 303.947 2
 -3 -11 2 3094.3 368.889 4
 3 11 -1 300.113 88.1214 2
 -3 -11 1 451.965 144.985 4
 -3 -11 1 290.676 128.757 5
 -3 -11 0 -60.3202 75.8459 5
 -3 -11 0 -63.0734 85.6875 4
 3 -11 1 1063.47 175.028 3
 -3 -11 -1 1351.44 311.852 5
 3 -11 2 2991.52 273.773 3
 -3 -11 -2 2933.25 478.036 5
 3 -11 3 12.2326 18.1376 3
 -3 -11 -3 -105.528 84.021 5
 -3 11 -3 -55.9473 75.8656 2
 3 -11 4 9281.5 694.769 5
 -3 11 -4 9994.29 758.101 2
 -3 -11 -4 9013.13 831.633 5
 -3 -11 -5 5591.39 661.461 5
 3 -11 5 5489.86 513.685 5
 -3 11 -5 5642.82 602.687 2
 3 -11 6 682.446 171.12 5
 -3 -11 -6 1191.38 309.324 5
 -3 11 -6 1429.61 334.828 2
 -3 11 -7 552.052 211.54 2
 -3 -11 -7 496.643 185.58 5
 -3 11 -8 -27.0643 82.0107 2
 -3 -11 -8 -22.3207 111.743 5
 -3 11 -9 -102.565 73.9871 2
 -3 -11 -9 42.2064 61.3353 5
 -3 11 -10 955.622 327.834 2
 -3 -11 -10 732.632 253.648 5
 -3 -11 -11 261.252 161.37 5
 -3 11 -11 344.764 196.035 2
 -3 11 -12 50.5123 145.452 2
 -3 11 -13 -199.183 167.344 2
 3 12 -15 441.069 255.792 2
 3 12 -14 172.865 145.836 2
 3 -12 -14 192.965 111.826 3
 3 12 -13 1131.08 333.747 2
 3 -12 -13 1624.09 446.498 3
 3 12 -12 75.5259 85.3817 2
 3 -12 -12 -56.0793 85.5627 3
 3 -12 -11 23.6378 86.0686 3
 3 12 -11 328.92 156.894 2
 -3 -12 10 636.762 185.824 5
 3 -12 -10 333.914 182.247 3
 3 12 -10 468.121 193.585 2
 -3 -12 9 4384.94 493.917 5
 3 -12 -9 3601.55 567.87 3
 3 12 -9 2989.8 465.181 2
 3 -12 -8 759.525 257.476 3
 -3 -12 8 603.677 183.647 5
 3 12 -8 540.401 189.097 2
 3 -12 -7 803.578 261.651 3
 -3 -12 7 542.231 164.692 5
 3 12 -7 656.296 181.294 2
 3 -12 -6 294.671 142.308 3
 -3 -12 6 322.405 147.705 5
 3 12 -6 246.491 124.259 2
 -3 -12 5 3987.43 521.513 5
 3 -12 -5 4542.4 547.493 3
 3 12 -5 4355.9 462.711 2
 3 -12 -4 2887.52 418.096 3
 -3 -12 4 2420.72 415.436 5
 3 12 -4 3113.6 373.065 2
 3 -12 -3 2458.9 365.695 3
 -3 -12 3 2606.03 436.376 5
 3 12 -3 2085.73 280.076 2
 -3 -12 3 2081.05 289.73 4
 -3 -12 2 1927.2 300.237 4
 -3 -12 2 2403.05 428.394 5
 3 12 -2 2027.38 256.97 2
 3 -12 -2 1777.23 293.597 3
 -3 -12 1 1284.19 262.792 4
 3 -12 -1 1225.32 232.609 3
 -3 -12 1 1016.8 289.915 5
 3 12 -1 1305.11 188.688 2
 3 -12 0 1639.67 258.816 3
 -3 -12 0 1372.64 289.09 4
 -3 -12 0 1554.16 361.15 5
 3 12 0 1720.51 196.091 2
 3 -12 1 7420.19 505.154 3
 -3 -12 -1 6875.17 743.653 5
 3 12 1 6759.43 330.816 2
 3 -12 2 2640.23 275.281 3
 -3 -12 -2 3272.64 507.877 5
 -3 12 -3 1463.35 295.944 2
 -3 -12 -3 1900.73 420.443 5
 -3 12 -4 192.416 87.5246 2
 -3 -12 -4 436.112 217.036 5
 3 -12 4 311.274 141.367 5
 3 -12 5 10965.1 779.419 5
 -3 12 -5 12577.6 923.624 2
 -3 -12 -5 10757 962.653 5
 3 -12 6 48.8985 75.0606 5
 -3 -12 -6 -72.2535 122.866 5
 -3 12 -6 -34.8308 124.315 2
 -3 -12 -7 730.417 261.874 5
 -3 12 -7 697.475 245.717 2
 -3 -12 -8 4.05115 61.0826 5
 -3 12 -8 -25.9507 54.629 2
 -3 -12 -9 749.846 272.53 5
 -3 12 -9 970.586 304.819 2
 -3 -12 -10 7.97602 94.1893 5
 -3 12 -10 -161.158 137.661 2
 -3 -12 -11 1826.29 435.474 5
 -3 12 -11 1782.79 435.134 2
 -3 12 -12 -241.537 178.771 2
 3 13 -14 214.129 170.445 2
 3 -13 -14 192.005 167.233 3
 3 13 -13 1188.81 364.962 2
 3 -13 -13 1724.75 475.665 3
 3 13 -12 152.936 135.895 2
 3 -13 -12 374.295 219.027 3
 3 13 -11 267.897 173.486 2
 3 -13 -11 477.036 229.204 3
 3 13 -10 460.152 197.979 2
 3 -13 -10 348.16 212.423 3
 3 -13 -9 1508.57 404.902 3
 3 13 -9 1844.19 375.237 2
 -3 -13 9 1771 329.324 5
 3 13 -8 673.393 217.911 2
 -3 -13 8 1067.47 266.179 5
 3 -13 -8 1332.54 348.775 3
 3 -13 -7 1117.31 314.476 3
 3 13 -7 1048.63 269.663 2
 -3 -13 7 949.617 255.295 5
 -3 -13 6 778.665 236.529 5
 3 -13 -6 898.457 265.307 3
 3 13 -6 819.1 202.694 2
 3 13 -5 269.43 121.146 2
 3 -13 -5 238.319 187.313 3
 -3 -13 5 -45.6987 155.919 5
 3 -13 -4 2028.74 361.508 3
 -3 -13 4 2287.01 415.794 5
 3 13 -4 2231.31 324.893 2
 -3 -13 3 247.547 103.864 4
 -3 -13 3 256.435 117.347 5
 3 -13 -3 223.081 93.1021 3
 3 13 -3 144.047 71.8029 2
 -3 -13 2 -28.582 66.6426 4
 3 -13 -2 18.4516 46.6963 3
 3 13 -2 55.3465 63.8474 2
 -3 -13 2 126.99 104.867 5
 -3 -13 1 -4.05754 41.4405 4
 3 -13 -1 100.692 76.7211 3
 3 13 -1 174.891 76.0533 2
 -3 -13 1 101.755 50.1351 5
 3 -13 0 3980.97 422.77 3
 -3 -13 0 4349.94 605.686 5
 -3 -13 0 4206.73 524.297 4
 3 -13 1 46.8357 45.974 3
 -3 -13 -1 236.735 178.96 5
 3 -13 2 3754.19 344.348 3
 -3 -13 -2 4124.81 607.117 5
 -3 13 -3 9.76186 40.0487 2
 -3 -13 -3 2.18222 94.1783 5
 3 -13 4 183.335 100.359 5
 -3 -13 -4 210.518 173.694 5
 -3 13 -4 126.002 104.569 2
 -3 -13 -5 132.876 133.066 5
 3 -13 5 114.364 103.198 5
 -3 13 -5 91.0783 92.7455 2
 3 -13 6 69.9265 60.2438 5
 -3 -13 -6 88.8858 102.116 5
 -3 13 -6 126.061 126.199 2
 -3 -13 -7 1273.29 347.466 5
 -3 13 -7 789.884 254.344 2
 -3 -13 -8 219.021 172.582 5
 -3 13 -8 90.1185 81.3997 2
 -3 -13 -9 370.807 184.251 5
 -3 13 -9 -24.3461 59.9463 2
 -3 -13 -10 876.981 317.28 5
 -3 13 -10 1298.3 384.554 2
 -3 -13 -11 499.672 244.508 5
 -3 13 -11 504.787 235.71 2
 -3 13 -12 -160.438 154.793 2
 3 14 -14 -52.9175 91.9908 2
 3 14 -13 405.867 212.495 2
 3 -14 -13 76.7274 101.799 3
 3 14 -12 61.639 119.799 2
 3 -14 -12 397.602 236.502 3
 3 14 -11 381.222 191.137 2
 3 -14 -11 505.469 266.391 3
 3 -14 -10 160.335 162.787 3
 3 14 -10 40.072 85.2955 2
 3 14 -9 456.443 197.616 2
 3 -14 -9 654.755 266.192 3
 -3 -14 9 827.667 236.71 5
 -3 -14 8 213.797 132.3 5
 3 -14 -8 546.964 237.644 3
 3 14 -8 340.19 158.862 2
 3 14 -7 170.559 91.4172 2
 3 -14 -7 185.514 136.798 3
 -3 -14 7 379.441 167.11 5
 -3 -14 6 5741.81 662.36 5
 3 -14 -6 5935.4 703.814 3
 3 14 -6 5983.99 618.445 2
 3 -14 -5 2586.54 451.441 3
 3 14 -5 2024.75 336.259 2
 -3 -14 5 1621.11 367.189 5
 3 -14 -4 581.829 214.681 3
 3 14 -4 945.782 214.659 2
 -3 -14 4 783.197 259.646 5
 -3 -14 3 1630.37 273.626 4
 3 -14 -3 1528.08 316.471 3
 3 14 -3 1973.87 296.284 2
 -3 -14 3 1314.81 335.38 5
 3 -14 -2 3494.81 465.903 3
 -3 -14 2 3736.9 569.51 5
 3 14 -2 4099.12 394.516 2
 -3 -14 2 3733.49 452.153 4
 -3 -14 1 137.891 91.1354 4
 3 -14 -1 74.5887 75.2937 3
 -3 -14 1 184.041 158.753 5
 3 -14 0 65.456 65.144 3
 -3 -14 0 227.654 110.711 4
 -3 -14 0 40.1659 101.806 5
 3 -14 1 49.3455 30.7063 3
 -3 -14 -1 -37.6761 109.987 5
 -3 -14 -2 1329.29 362.551 5
 3 -14 3 3616.55 521.707 5
 -3 -14 -3 4126.59 631.876 5
 -3 -14 -4 472.724 202.496 5
 3 -14 4 328.087 167.155 5
 -3 14 -4 314.194 118.965 2
 3 -14 5 435.506 187.036 5
 -3 -14 -5 451.375 188.348 5
 -3 14 -5 406.779 174.934 2
 -3 -14 -6 897.219 316.007 5
 -3 14 -6 688.043 229.063 2
 -3 -14 -7 210.018 212.064 5
 -3 14 -7 -117.442 166.665 2
 -3 -14 -8 45.4305 113.382 5
 -3 14 -8 23.5717 94.5345 2
 -3 14 -9 550.926 217.374 2
 -3 -14 -9 634.544 270.852 5
 -3 14 -10 157.393 130.261 2
 -3 -14 -10 80.7968 124.241 5
 -3 -14 -11 1782.99 456.493 5
 -3 14 -11 1486.95 418.228 2
 -3 14 -12 -315.234 208.658 2
 3 15 -13 163.563 171.935 2
 3 15 -12 422.062 221.398 2
 3 -15 -12 366.964 242.072 3
 3 -15 -11 258.518 199.043 3
 3 15 -11 577.001 257.48 2
 3 15 -10 130.896 122.089 2
 3 -15 -10 -67.3248 103.348 3
 3 15 -9 1297.06 338.599 2
 3 -15 -9 1159.82 370.912 3
 -3 -15 9 1272.45 307.878 5
 3 15 -8 3410.29 524.774 2
 3 -15 -8 3839 627.523 3
 -3 -15 8 3076.42 487.486 5
 3 15 -7 491.325 188.786 2
 3 -15 -7 921.486 304.376 3
 -3 -15 7 753.624 253.785 5
 3 -15 -6 441.6 212.245 3
 3 15 -6 483.133 179.731 2
 -3 -15 6 643.259 241.475 5
 3 -15 -5 2161.95 424.245 3
 -3 -15 5 2163.16 436.042 5
 3 15 -5 2168.47 361.263 2
 3 -15 -4 645.496 226.954 3
 3 15 -4 206.484 113.284 2
 -3 -15 4 432.803 193.766 5
 -3 -15 3 493.942 157.108 4
 3 -15 -3 550.713 199.334 3
 -3 -15 3 434.39 196.532 5
 -3 -15 2 662.313 198.888 4
 -3 -15 2 788.019 265.453 5
 3 -15 -2 530.019 180.966 3
 -3 -15 1 112.791 74.173 4
 3 -15 -1 114.615 78.9032 3
 -3 -15 1 142.745 87.3338 5
 -3 -15 0 430.57 169.74 4
 3 -15 0 302.371 125.694 3
 -3 -15 0 654.695 273.086 5
 -3 -15 -1 2312.27 423.988 4
 -3 -15 -1 2259.11 481.45 5
 -3 -15 -2 4109.93 643.21 5
 -3 -15 -3 431.862 198.7 5
 3 -15 3 744.661 252.061 5
 -3 15 -4 -179.77 114.551 2
 -3 -15 -4 -70.7659 156.372 5
 3 -15 4 -54.6571 115.058 5
 3 -15 5 253.683 139.734 5
 -3 -15 -5 -7.75823 123.917 5
 -3 15 -5 68.2151 98.8735 2
 -3 -15 -6 584.523 248.896 5
 -3 15 -6 287.383 151.416 2
 -3 -15 -7 -102.228 125.061 5
 -3 15 -7 -16.2689 63.0491 2
 -3 -15 -8 146.745 151.669 5
 -3 15 -8 229.034 173.702 2
 -3 -15 -9 22.5009 67.5679 5
 -3 15 -9 116.913 94.5708 2
 -3 -15 -10 888.7 329.924 5
 -3 15 -10 768.519 291.052 2
 -3 -15 -11 -9.08401 72.8434 5
 -3 15 -11 74.6894 108.737 2
 3 16 -13 440.433 267.503 2
 3 16 -12 143.191 139.666 2
 3 16 -11 -130.436 128.303 2
 3 -16 -11 13.5648 82.6534 3
 3 16 -10 2376.44 476.435 2
 3 -16 -10 1616.32 449.483 3
 3 16 -9 121.261 117.624 2
 3 -16 -9 31.2731 73.585 3
 -3 -16 9 306.847 161.874 5
 3 -16 -8 354.34 203.81 3
 -3 -16 8 396.274 187.152 5
 3 16 -8 397.351 173.052 2
 3 16 -7 168.941 107.89 2
 3 -16 -7 37.1141 61.8139 3
 -3 -16 7 14.5352 71.2854 5
 3 16 -6 364.408 160.838 2
 3 -16 -6 354.785 192.018 3
 -3 -16 6 284.302 170.825 5
 3 -16 -5 3691.63 577.338 3
 -3 -16 5 3012.98 528.674 5
 3 16 -5 2988.15 433.595 2
 3 -16 -4 106.637 118.603 3
 -3 -16 4 63.4902 54.5578 5
 3 -16 -3 638.681 225.814 3
 -3 -16 3 513.919 251.311 5
 -3 -16 2 -12.548 136.587 5
 3 -16 -2 21.1531 71.785 3
 -3 -16 2 45.7063 32.5962 4
 3 -16 -1 330.714 146.671 3
 -3 -16 1 411.202 201.422 5
 -3 -16 1 294.861 142.763 4
 -3 -16 0 884.924 266.211 4
 -3 -16 0 695.897 275.259 5
 -3 -16 -1 556.918 203.389 4
 -3 -16 -1 581.051 265.222 5
 -3 -16 -2 147.407 75.531 5
 3 -16 2 367.697 187.835 5
 -3 -16 -3 848.226 304.96 5
 3 -16 3 1057.73 304.799 5
 -3 -16 -4 1014.06 335.093 5
 3 -16 4 327.149 171.481 5
 -3 16 -5 120.1 102.662 2
 3 -16 5 63.5871 112.984 5
 -3 -16 -5 -36.0568 131.505 5
 -3 -16 -6 834.821 342.214 5
 -3 16 -6 656.684 233.971 2
 -3 -16 -7 829.557 314.647 5
 -3 16 -7 741.053 264.921 2
 -3 -16 -8 472.047 236.668 5
 -3 16 -8 380.24 211.017 2
 -3 -16 -9 -15.7301 74.8683 5
 -3 16 -9 250.463 180.099 2
 -3 -16 -10 213.486 207.005 5
 -3 16 -10 3.31247 55.3136 2
 -3 -16 -11 68.6459 120.223 5
 -3 16 -11 502.105 278.029 2
 3 17 -12 65.5462 105.733 2
 3 17 -11 349.291 199.492 2
 3 -17 -11 351.804 238.531 3
 3 17 -10 95.7047 112.458 2
 3 -17 -10 86.8561 134.544 3
 3 17 -9 -58.8634 95.3984 2
 3 -17 -9 117.016 111.434 3
 3 17 -8 220.364 128.241 2
 3 -17 -8 459.054 226.633 3
 -3 -17 8 322.302 172.651 5
 3 -17 -7 -71.8367 128.562 3
 -3 -17 7 -20.4477 58.8063 5
 3 17 -7 -123.474 75.8315 2
 3 -17 -6 438.956 205.058 3
 -3 -17 6 228.096 137.728 5
 3 -17 -5 -154.071 128.015 3
 -3 -17 5 5.04799 107.953 5
 3 -17 -4 1008.28 310.497 3
 -3 -17 4 915.817 311.936 5
 -3 -17 3 1050.39 335.786 5
 3 -17 -3 929.346 277.282 3
 3 -17 -2 1541.36 341.609 3
 -3 -17 2 933.057 320.04 5
 -3 -17 1 1627.58 346.312 4
 -3 -17 1 2006.55 469.01 5
 -3 -17 0 125.056 96.8968 4
 -3 -17 0 123.317 170.207 5
 -3 -17 -1 699.557 250.759 4
 -3 -17 -1 950.339 318.27 5
 3 -17 1 806.188 288.546 5
 -3 -17 -2 2241.93 512.58 5
 3 -17 2 2203.61 467.55 5
 -3 -17 -2 2447.37 477.593 4
 -3 -17 -3 118.661 119.757 5
 3 -17 3 90.0309 74.7814 5
 -3 -17 -4 82.8074 125.638 5
 3 -17 4 53.5392 74.6456 5
 -3 -17 -5 -68.6413 115.78 5
 -3 17 -6 443.173 180.45 2
 -3 -17 -6 205.757 125.1 5
 -3 -17 -7 -430.79 245.416 5
 -3 17 -7 246.309 140.391 2
 -3 -17 -8 33.778 87.9279 5
 -3 17 -8 -150.423 132.528 2
 -3 -17 -9 218.925 174.169 5
 -3 17 -9 462.559 236.434 2
 -3 -17 -10 -37.6814 98.2681 5
 -3 17 -10 78.5823 123.407 2
 3 18 -11 173.471 154.529 2
 3 -18 -10 -192.862 178.376 3
 3 18 -10 -16.5105 71.2803 2
 3 -18 -9 777.369 322.777 3
 3 -18 -8 515.181 256.914 3
 -3 -18 8 248.889 157.299 5
 3 -18 -7 -181.724 151.537 3
 -3 -18 7 -9.90194 53.3295 5
 3 -18 -6 2716.44 538.654 3
 -3 -18 6 2763.02 539.408 5
 3 -18 -5 541.555 236.744 3
 -3 -18 5 1115.73 342.041 5
 -3 -18 4 359.651 186.934 5
 3 -18 -4 663.871 247.681 3
 3 -18 -3 491.153 202.657 3
 -3 -18 3 378.543 211.135 5
 -3 -18 2 1919.95 469.696 5
 -3 -18 1 240.411 134.224 5
 -3 -18 0 963.709 292.65 4
 -3 -18 0 625.485 272.628 5
 3 -18 0 886.766 314.436 5
 -3 -18 -1 -61.7311 70.2819 4
 -3 -18 -1 71.0313 88.9954 5
 3 -18 1 176.579 147.224 5
 -3 -18 -2 179.166 113.612 4
 -3 -18 -2 -111.071 135.447 5
 3 -18 2 28.2774 59.546 5
 -3 -18 -3 648.109 291.581 5
 3 -18 3 527.704 237.473 5
 -3 -18 -4 -161.771 158.733 5
 3 -18 4 -136.551 126.213 5
 -3 -18 -5 -41.6609 127.895 5
 -3 -18 -6 1537.42 452.495 5
 -3 -18 -7 -147.553 162.271 5
 -3 18 -8 -232.083 163.852 2
 -3 -18 -8 25.7884 97.3285 5
 -3 18 -9 344.846 233.382 2
 3 -19 -9 224.864 167.402 3
 3 -19 -8 -108.856 137.02 3
 3 -19 -7 438.323 228.485 3
 -3 -19 7 972.957 328.911 5
 3 -19 -6 4.74689 59.5748 3
 -3 -19 6 37.5006 66.5041 5
 3 -19 -5 109.154 122.111 3
 -3 -19 5 106.906 126.631 5
 3 -19 -4 -61.3905 90.1738 3
 -3 -19 4 77.0385 67.1334 5
 -3 -19 3 234.956 172.969 5
 -3 -19 2 122.777 167.892 5
 -3 -19 1 18.8006 111.915 5
 3 -19 -1 -109.405 149.39 5
 -3 -19 0 94.8844 116.763 5
 3 -19 0 -4.67203 109.703 5
 -3 -19 -1 1025.23 369.848 5
 3 -19 1 1229.52 384.437 5
 -3 -19 -2 -175.138 142.247 4
 -3 -19 -2 -55.3993 139.922 5
 3 -19 2 153.025 146.682 5
 -3 -19 -3 84.8453 91.1089 4
 -3 -19 -3 19.8596 108.102 5
 3 -19 3 -196.162 156.245 5
 3 -19 4 605.996 262.268 5
 -3 -19 -4 564.612 300.372 5
 -3 -19 -5 1933.16 514.344 5
 -3 -19 -6 744.039 315.507 5
 3 -20 -8 221.746 184.123 3
 -3 -20 7 -181.957 151.749 5
 3 -20 -7 -341.505 216.953 3
 3 -20 -6 304.603 178.383 3
 -3 -20 6 20.4998 69.1581 5
 -3 -20 5 39.0349 95.2993 5
 3 -20 -5 189.722 172.341 3
 -3 -20 4 325.484 202.664 5
 -3 -20 3 190.664 195.393 5
 -3 -20 2 688.945 292.816 5
 3 -20 -2 753.398 323.976 5
 -3 -20 1 73.7721 95.0748 5
 3 -20 -1 -377.035 235.313 5
 -3 -20 0 90.4906 129.099 5
 3 -20 0 483.853 261.621 5
 -3 -20 -1 811.606 342.402 5
 3 -20 1 517.647 258.667 5
 -3 -20 -2 393.81 239.836 5
 3 -20 2 232.386 177.45 5
 -3 -20 -3 -291.61 191.644 4
 -3 -20 -3 -35.5983 92.3107 5
 3 -20 3 -79.1526 86.9418 5
 -3 -20 -4 378.391 221.184 4
 -3 -20 -5 220.84 153.012 4
 -3 -21 6 -75.4101 107.07 5
 -3 -21 5 -131.869 140.925 5
 -3 -21 4 179.229 202.72 5
 -3 -21 3 2213.8 560.795 5
 -3 -21 2 31.0062 142.786 5
 3 -21 -2 230.501 209.521 5
 3 -21 -1 145.401 211.599 5
 3 -21 0 543.28 295.855 5
 3 -21 1 1331.07 438.653 5
 3 -21 2 -345.319 222.322 5
 3 -21 3 70.5048 113.256 5
 -3 -21 -4 159.208 153.152 4
 -3 -21 -5 40.0043 105.197 4
 4 0 -19 -166.384 145.294 2
 4 0 -18 60.2591 97.6375 2
 4 0 -17 -186.408 178.93 2
 4 0 -16 2465.51 467.235 2
 4 0 -16 2399.15 440.664 3
 4 0 -15 -51.6081 66.7683 2
 4 0 -15 10.4113 49.9078 3
 4 0 -14 1254.71 305.135 2
 4 0 -14 1199.85 283.94 3
 4 0 -13 -92.9464 109.321 2
 4 0 -12 32628.9 1377.43 2
 -4 0 11 -1.87845 25.6589 5
 4 0 -11 129.706 87.1962 2
 4 0 -10 142.165 92.579 2
 -4 0 10 -15.8413 51.9376 5
 -4 0 9 -16.4816 36.9841 5
 4 0 -9 4.49773 19.5599 1
 4 0 -8 10152.2 383.069 1
 -4 0 8 10240.6 486.858 5
 -4 0 7 113.601 51.7821 5
 4 0 -7 15.5427 14.5774 1
 -4 0 6 10074.3 447.143 5
 -4 0 5 2.31546 26.8633 5
 -4 0 4 34127.6 772.763 5
 -4 0 3 12.8761 17.9532 5
 -4 0 2 33691.6 721.429 5
 -4 0 1 200.115 67.6781 5
 -4 0 0 6230.68 299.127 5
 -4 0 -1 21.6011 15.774 5
 4 0 1 1.27802 11.8196 5
 -4 0 -2 80860.2 1037.14 5
 4 0 2 77888.4 1156.58 5
 -4 0 -2 82490 1526.56 4
 -4 0 -3 21.5115 21.0168 5
 -4 0 -3 -19.7651 45.0774 4
 4 0 3 -1.11305 16.7362 5
 -4 0 -4 3356.32 204.243 5
 4 0 4 3592.37 243.713 5
 -4 0 -4 4475.68 409.99 4
 -4 0 -5 -75.3802 60.4889 4
 -4 0 -5 21.5732 22.3428 5
 -4 0 -6 596.883 156.316 4
 -4 0 -6 622.765 82.6266 5
 4 0 6 746.894 175.304 1
 -4 0 -7 -17.4887 115.1 4
 -4 0 -7 7.14355 12.1266 5
 -4 0 -7 -17.1459 48.1181 2
 4 0 7 119.748 79.0945 1
 -4 0 -8 2976.97 142.975 5
 4 0 8 3045.98 385.691 1
 -4 0 -8 2379.48 382.235 2
 -4 0 -8 2807.6 398.347 4
 -4 0 -9 60.683 72.0766 4
 4 0 9 -65.8542 45.3647 1
 -4 0 -9 -11.216 120.142 2
 4 0 10 4111.52 477.828 1
 -4 0 -10 4484.98 565.618 2
 -4 0 -10 4369.94 542.571 4
 -4 0 -11 78.8728 85.9168 4
 4 0 11 65.0279 62.3144 1
 -4 0 -11 23.4669 142.711 2
 -4 0 -12 2153.36 406.027 4
 -4 0 -12 2109.68 437.089 2
 4 0 12 2265.14 374.248 1
 -4 0 -13 -27.5863 88.6779 4
 4 0 13 -85.239 67.377 1
 -4 0 -13 -63.188 72.9369 2
 4 0 14 235.146 140.38 1
 -4 0 -14 398.346 215.602 2
 4 0 15 3.95629 103.719 1
 4 -1 -19 409.118 238.397 2
 4 1 -19 446.629 231.361 2
 4 -1 -18 -40.2853 58.5613 2
 4 1 -18 -127.277 125.351 2
 4 -1 -17 920.16 285.672 3
 4 -1 -17 1347.5 354.339 2
 4 1 -17 1168.57 353.912 2
 4 -1 -16 -44.5099 92.1076 2
 4 1 -16 25.6156 80.7765 2
 4 -1 -16 -122.323 120.565 3
 4 1 -15 4067.48 531.778 3
 4 -1 -15 3318.57 509.103 3
 4 -1 -15 3648.83 544.369 2
 4 1 -15 4324.03 604.021 2
 4 -1 -14 1643.68 348.051 2
 4 1 -14 1658.28 321.902 3
 4 -1 -14 1996.73 374.249 3
 4 1 -14 2201.49 407.577 2
 4 -1 -13 528.465 205.443 2
 4 1 -13 654.124 222.328 2
 -4 -1 12 686.315 146.165 5
 4 1 -12 711.187 214.66 2
 4 -1 -12 586.789 197.988 2
 -4 -1 11 13057 612.506 5
 4 1 -11 14009.9 859.253 2
 4 -1 -11 14022 827.882 2
 -4 1 10 2060 251.012 5
 -4 -1 10 1994.88 230.913 5
 4 1 -10 2226.75 329.761 2
 -4 1 9 470.569 117.296 5
 -4 -1 9 565.815 119.77 5
 -4 -1 8 3237.28 269.26 5
 -4 1 8 3717.6 307.777 5
 4 1 -8 3184.58 191.025 1
 -4 -1 7 3349.06 268.173 5
 -4 1 7 2872.84 259.429 5
 4 1 -7 2727.38 152.615 1
 4 1 -6 5655.09 178.316 1
 -4 1 6 5416.06 336.901 5
 -4 -1 6 5760.85 340.724 5
 -4 1 5 -0.69569 26.3967 5
 -4 -1 5 -12.0647 29.138 5
 -4 1 4 10512.2 427.231 5
 -4 -1 4 11079.4 455.375 5
 -4 -1 3 438.381 87.3717 5
 -4 1 3 509.712 92.604 5
 -4 1 2 861.744 114.692 5
 -4 -1 2 1045.69 134.878 5
 -4 1 1 8247.43 337.106 5
 -4 -1 1 8397.22 386.333 5
 -4 -1 0 18013.7 567.987 5
 -4 1 0 17879.3 471.586 5
 4 -1 0 18080.5 508.294 5
 4 1 1 39768.6 904.195 5
 -4 -1 -1 40827.9 851.382 5
 -4 -1 -1 40588.1 1061.16 4
 -4 1 -1 40104.3 672.549 5
 4 -1 1 39244.4 738.835 5
 -4 1 -2 318.049 55.2345 5
 -4 -1 -2 254.096 65.7104 5
 4 -1 2 321.254 65.2079 5
 4 1 2 290.572 79.8661 5
 -4 -1 -2 303.744 89.1519 4
 -4 1 -3 21673.9 434.083 5
 -4 -1 -3 20890.3 862.642 4
 4 -1 3 20502 523.833 5
 -4 -1 -3 20918.7 620.106 5
 4 1 3 19429.3 638.784 5
 -4 1 -3 20404 763.128 4
 4 -1 4 9082.67 334.165 5
 -4 1 -4 9417.62 267.713 5
 -4 1 -4 9599.31 558.554 4
 -4 -1 -4 9054.79 608.577 4
 -4 -1 -4 9524.14 418.411 5
 -4 1 -5 196.409 87.1373 4
 -4 -1 -5 210.392 90.4025 4
 -4 1 -5 198.469 34.4734 5
 -4 -1 -5 121.687 47.7315 5
 4 1 6 -42.7061 56.8466 1
 -4 1 -6 15.3203 56.4875 4
 -4 -1 -6 24.1497 27.1214 5
 -4 1 -6 14.7769 40.6943 2
 -4 -1 -6 3.36444 76.451 4
 -4 1 -7 581.802 159.494 4
 4 1 7 399.944 118.61 1
 -4 -1 -7 425.172 155.509 4
 4 -1 7 647.492 170.789 1
 -4 -1 -7 663.266 110.119 5
 -4 1 -7 588.324 191.602 2
 -4 -1 -8 1531.4 162.803 5
 -4 1 -8 1687.06 302.891 4
 4 1 8 1727.75 287.353 1
 4 -1 8 1482.2 261.952 1
 -4 1 -8 1729.23 332.219 2
 4 -1 9 725.174 195.984 1
 -4 1 -9 1327.95 281.59 4
 -4 -1 -9 986.136 243.598 2
 4 1 9 840.814 212.204 1
 -4 1 -9 815.085 235.2 2
 -4 1 -10 2441.71 403.705 4
 4 -1 10 2211.62 347.072 1
 4 1 10 2760.54 396.309 1
 -4 -1 -10 2033.93 376.353 2
 -4 1 -10 2455.99 425.596 2
 -4 -1 -11 -46.6048 58.37 4
 4 1 11 -22.5775 82.7061 1
 -4 -1 -11 -34.9812 61.9329 2
 4 -1 11 -42.3695 72.7363 1
 -4 1 -11 -223.345 126.15 4
 -4 1 -11 59.6622 85.1397 2
 -4 1 -12 725.356 222.09 4
 -4 -1 -12 847.156 269.733 4
 -4 -1 -12 595.904 231.235 2
 4 1 12 667.742 215.118 1
 4 -1 12 517.41 183.759 1
 -4 1 -12 446.574 209.697 2
 4 -1 13 84.2578 83.4516 1
 4 1 13 173.762 145.527 1
 -4 -1 -13 25.7568 96.5012 4
 -4 1 -13 196.284 136.13 2
 4 1 14 353.317 156.429 1
 4 -1 14 150.511 95.0745 1
 -4 1 -14 205.177 177.204 2
 4 -1 15 -0.23119 163.438 1
 -4 1 -15 489.768 233.828 2
 4 -2 -19 -37.1609 79.6687 2
 4 -2 -18 232.374 151.691 2
 4 2 -18 253.406 181.311 2
 4 -2 -17 1289.58 351.003 2
 4 2 -17 1001.68 332.242 2
 4 -2 -17 1077.6 330.913 3
 4 -2 -16 641.288 240.004 3
 4 -2 -16 540.057 212.114 2
 4 2 -16 877.121 267.934 2
 4 -2 -15 -109.773 100.585 2
 4 -2 -15 -40.4673 87.6077 3
 4 -2 -14 1097 299.817 3
 4 2 -14 957.289 231.718 3
 4 -2 -14 1533.31 326.423 2
 4 2 -14 1407.12 320.202 2
 -4 -2 13 487.635 124.649 5
 4 2 -13 781.213 225.777 2
 4 -2 -13 639.664 182.44 2
 -4 -2 12 6.70154 38.7697 5
 4 -2 -12 -75.0408 67.9179 2
 4 2 -12 32.189 60.3239 2
 -4 -2 11 -65.321 52.4622 5
 4 2 -11 -19.244 66.6734 2
 4 -2 -11 51.0268 52.2625 2
 -4 -2 10 1779.24 212.826 5
 4 2 -10 1717.61 291.627 2
 -4 -2 9 57.7031 58.2265 5
 -4 2 8 3736.95 320.339 5
 -4 -2 8 4346.88 311.65 5
 -4 -2 7 7379.16 400.649 5
 -4 2 7 6730.14 417.482 5
 -4 2 6 22805.7 730.659 5
 -4 -2 6 23777.8 707.214 5
 -4 -2 5 4803.12 320.969 5
 -4 2 5 4384.7 303.817 5
 4 2 -4 20987.4 320.725 1
 -4 2 4 20818.2 636.58 5
 -4 -2 4 19749.8 648.299 5
 4 2 -3 115464 994.85 1
 -4 2 3 116782 1413.45 5
 -4 -2 3 116066 1592.26 5
 -4 2 2 3553.68 235.016 5
 -4 -2 2 3468.08 275.778 5
 4 2 -2 3417.75 203.507 1
 -4 -2 1 44.3602 32.828 5
 -4 2 1 16.0089 11.6009 5
 4 2 -1 45.9176 27.7051 1
 -4 2 0 687.919 93.6701 5
 4 -2 0 678.091 94.2973 5
 -4 -2 0 778.005 130.051 5
 -4 -2 0 633.313 127.505 4
 4 -2 1 2993.05 189.852 5
 -4 -2 -1 3026.55 260.28 5
 -4 2 -1 3024.57 182.485 5
 -4 -2 -1 2823.34 296.754 4
 -4 2 -2 13149.5 352.201 5
 4 -2 2 12944.3 390.407 5
 -4 -2 -2 12769.4 547.37 5
 -4 -2 -2 12801.7 673.161 4
 -4 2 -3 725.855 74.7641 5
 4 -2 3 782.248 91.8425 5
 -4 -2 -3 762.556 172.256 4
 -4 -2 -3 635.014 124.845 5
 -4 2 -4 3865.36 152.064 5
 -4 -2 -4 3952.31 309.292 5
 4 -2 4 3598.12 185.452 5
 -4 2 -4 3929.27 335.178 4
 -4 -2 -4 3885.17 415.906 4
 -4 -2 -5 4316.84 326.975 5
 -4 2 -5 4891.69 488.029 2
 -4 2 -5 4020.05 362.608 4
 -4 -2 -5 4297.75 461.885 4
 -4 -2 -6 39.0923 42.5929 5
 -4 2 -6 35.2071 31.9671 4
 -4 2 -6 16.1865 53.5523 2
 4 2 6 62.3012 79.6089 1
 -4 2 -7 20.2894 34.2552 4
 4 2 7 81.2808 60.0324 1
 -4 -2 -7 117.963 57.9899 5
 -4 2 -7 90.7208 96.6411 2
 4 -2 8 2365.66 335.932 1
 -4 -2 -8 2519.2 255.926 5
 4 2 8 2386.44 343.444 1
 -4 2 -8 2483.72 396.397 2
 -4 2 -8 2571.9 349.132 4
 4 -2 9 2972.42 395.858 1
 4 2 9 3529.46 432.004 1
 -4 2 -9 3430.26 424.053 4
 -4 2 -9 3291.66 473.369 2
 -4 2 -10 5.9357 67.9374 4
 4 2 10 23.2445 54.3126 1
 -4 2 -10 45.0006 60.8714 2
 4 -2 10 -55.4321 80.5648 1
 4 -2 11 -101.886 77.0055 1
 -4 2 -11 84.6173 78.5467 4
 4 2 11 16.9569 49.2467 1
 -4 2 -11 -3.87344 54.5595 2
 4 -2 12 -3.35914 81.6779 1
 4 2 12 -53.1417 68.2379 1
 -4 2 -12 -54.3561 75.0415 2
 -4 -2 -13 2064.82 443.913 4
 4 2 13 1668.89 343.801 1
 4 -2 13 1859.84 351.758 1
 -4 2 -13 1861.28 430.814 2
 4 -2 14 165.508 109.075 1
 -4 -2 -14 -223.698 173.541 4
 -4 2 -14 -57.5318 89.5584 2
 -4 2 -15 71.9314 103.094 2
 -4 2 -16 80.3158 117.198 2
 4 -3 -18 110.614 142.424 2
 4 3 -18 37.791 65.7757 2
 4 -3 -18 124.937 150.654 3
 4 -3 -17 -49.991 79.3023 2
 4 3 -17 45.1757 57.2005 2
 4 -3 -17 144.488 123.593 3
 4 -3 -16 -140.241 116.799 2
 4 -3 -16 -66.0027 112.771 3
 4 3 -16 -62.8646 127.609 2
 4 -3 -15 170.038 152.964 3
 4 -3 -15 506.392 193.371 2
 4 3 -15 550.354 221.542 2
 4 3 -14 -22.5114 50.4496 3
 4 -3 -14 -90.619 138.602 2
 4 -3 -14 -15.5199 94.3542 3
 4 3 -14 234.94 159.838 2
 4 -3 -13 930.625 237.337 2
 -4 -3 13 932.73 167.706 5
 4 3 -13 1017.29 267.839 2
 -4 -3 12 56.0866 47.5519 5
 4 -3 -12 35.133 56.8492 2
 4 3 -12 -7.7478 80.0514 2
 -4 -3 11 5097.18 364.269 5
 4 3 -11 5130.7 552.504 2
 4 -3 -11 4829.26 470.159 2
 -4 -3 10 2769.95 263.715 5
 4 3 -10 2945.39 389.203 2
 4 -3 -10 3118.36 348.681 2
 -4 -3 9 97.2075 45.1843 5
 -4 -3 8 206.346 74.8902 5
 -4 -3 7 1416.47 180.688 5
 -4 -3 6 10044.3 490.97 5
 -4 3 5 170.417 63.5063 5
 -4 -3 5 260.668 83.0492 5
 -4 3 4 15.9521 27.9772 5
 -4 -3 4 -19.3381 37.3196 5
 -4 -3 3 8525.98 469.558 5
 -4 3 3 9263.88 431.266 5
 4 3 -3 9494.2 284.676 1
 -4 3 2 96592.2 1327.01 5
 -4 -3 2 100219 1611.08 5
 4 3 -2 100298 1136.51 1
 -4 3 1 47434.4 880.312 5
 -4 -3 1 46387.2 1113.6 5
 4 3 -1 47870 900 1
 4 -3 0 42.5194 26.9339 5
 -4 3 0 106.317 45.7329 5
 -4 -3 0 1.98894 47.3791 5
 -4 -3 0 26.1804 52.2644 4
 4 -3 1 9173.39 338.425 5
 -4 -3 -1 9495.07 523.201 5
 -4 3 -1 9211.92 346.414 5
 -4 -3 -1 8728.19 547.957 4
 -4 3 -2 15563.7 424.802 5
 -4 -3 -2 15260.2 662.576 5
 4 -3 2 15512.4 412.419 5
 -4 -3 -2 15524 777.618 4
 -4 -3 -3 -1.32169 38.6135 4
 4 -3 3 45.9464 25.7651 5
 -4 -3 -3 10.4127 30.3073 5
 -4 -3 -4 83.2258 72.5799 4
 4 -3 4 40.5713 15.6336 5
 -4 -3 -4 -1.30251 45.8874 5
 -4 -3 -5 19937.2 788.91 5
 -4 3 -5 19828.4 997.696 2
 -4 3 -5 20310.2 767.812 4
 -4 3 -6 167.569 81.7107 4
 -4 -3 -6 76.1423 38.5034 5
 -4 3 -6 117.564 83.4822 2
 4 3 7 4474.49 452.462 1
 -4 -3 -7 3678.26 348.464 5
 -4 3 -7 3958.87 491.957 2
 -4 3 -7 3642.35 365.341 4
 4 3 8 9372.49 679.46 1
 -4 -3 -8 10006.1 578.714 5
 -4 3 -8 8791.15 762.731 2
 -4 3 -8 9118.99 612.745 4
 -4 -3 -9 4816.48 401.842 5
 4 -3 9 4576.48 483.729 1
 4 3 9 4637.6 490.536 1
 -4 3 -9 5568.31 639.948 2
 -4 3 -9 5957.05 525.576 4
 -4 3 -10 1696.96 294.878 4
 4 3 10 1468.91 288.528 1
 4 -3 10 1568.51 295.399 1
 -4 3 -10 1954.66 395.002 2
 4 -3 11 3822.31 482.715 1
 4 3 11 3641.22 469.187 1
 -4 3 -11 4353.41 616.591 2
 4 -3 12 44.6955 43.4789 1
 4 3 12 20.6981 41.721 1
 -4 3 -12 3.48976 67.1103 2
 4 -3 13 668.556 211.658 1
 -4 3 -13 130.703 125.41 2
 -4 -3 -14 797.654 291.269 4
 4 -3 14 540.968 205.051 1
 -4 3 -14 834.401 301.407 2
 -4 -3 -15 596.538 270.592 4
 -4 3 -15 653.733 281.616 2
 4 4 -18 228.812 173.45 2
 4 -4 -18 86.0757 110.082 3
 4 4 -17 95.0359 110.401 2
 4 -4 -17 346.999 209.212 3
 4 -4 -16 853.766 259.213 2
 4 -4 -16 956.477 308.852 3
 4 4 -16 777.314 282.957 2
 4 -4 -15 60.7094 68.6852 2
 4 -4 -15 -75.7033 105.57 3
 4 4 -15 -35.1845 86.5361 2
 4 4 -14 -31.8565 70.0901 2
 4 -4 -14 103.847 122.14 3
 4 -4 -14 158.574 100.619 2
 4 -4 -13 5992.18 584.475 2
 4 4 -13 6091.05 677.079 2
 -4 -4 13 6064.35 415.6 5
 -4 -4 12 762.45 142.949 5
 4 -4 -12 578.741 167.019 2
 4 4 -12 977.293 273.924 2
 -4 -4 11 968.434 161.787 5
 4 4 -11 1031.25 250.357 2
 4 -4 -11 917.409 202.531 2
 -4 -4 10 7651.86 447.879 5
 4 4 -10 7504.11 630.821 2
 4 -4 -10 7344.78 527.065 2
 -4 -4 9 15187.1 625.251 5
 -4 -4 8 12619.2 572.38 5
 -4 -4 7 203.066 81.6923 5
 -4 -4 6 12004.1 569.513 5
 -4 -4 5 18499.4 722.726 5
 -4 -4 4 19331.8 749.602 5
 -4 -4 4 18944.9 379.594 1
 -4 -4 3 1359.37 126.588 1
 -4 -4 3 1488.19 207.972 5
 -4 -4 2 816.117 152.676 5
 -4 -4 2 850.865 113.841 1
 4 4 -1 15189.4 512.339 1
 -4 -4 1 14714.2 680.51 5
 -4 -4 1 15050 668.579 4
 -4 -4 0 47310.2 1234.06 5
 4 4 0 48904.5 1004.75 1
 -4 -4 0 46461.4 1241.8 4
 4 -4 1 3316.92 214.103 5
 -4 -4 -1 3329.35 333.043 5
 -4 -4 -1 3371.13 355.482 4
 4 -4 2 8334.31 317.45 5
 -4 -4 -2 8571.36 541.317 5
 -4 -4 -2 8164.15 592.738 4
 -4 -4 -3 5498.22 441.494 5
 4 -4 3 5880.89 367.992 4
 4 -4 3 5736.21 240.368 5
 -4 -4 -3 5608.21 511.975 4
 4 -4 4 529.868 66.4515 5
 -4 -4 -4 663.937 157.46 5
 -4 4 -4 591.405 173.422 2
 -4 -4 -5 320.314 113.131 5
 -4 4 -5 319.997 128.32 2
 -4 4 -6 2934.44 413.777 2
 -4 -4 -6 2474.77 309.642 5
 4 4 7 1965.26 293.241 1
 -4 -4 -7 1644.51 257.824 5
 -4 4 -7 1579.47 222.969 4
 -4 4 -7 1827.47 345.97 2
 -4 -4 -8 2922.03 343.27 5
 4 4 8 3067.89 393.23 1
 -4 4 -8 2957.78 324.475 4
 -4 4 -8 2414.46 411.15 2
 4 4 9 391.054 143.84 1
 -4 4 -9 334.415 110.775 4
 -4 -4 -9 389.641 124.426 5
 -4 4 -9 537.361 212.284 2
 4 -4 10 3265.76 431.612 1
 4 4 10 4311.62 502.777 1
 -4 4 -10 3417.98 533.011 2
 4 -4 11 256.407 128.02 1
 -4 4 -11 497.12 206.963 2
 -4 4 -12 821.152 277.332 2
 4 -4 12 673.448 211.019 1
 4 -4 13 -74.6645 92.017 1
 -4 4 -13 234.835 178.537 2
 4 -4 14 369.198 172.217 1
 -4 4 -14 580.17 253.703 2
 -4 -4 -15 -165.607 148.81 4
 -4 4 -15 -48.2815 87.8517 2
 4 -5 -18 351.347 204.889 3
 4 -5 -17 573.755 279.758 3
 4 5 -17 172.275 128.111 2
 4 5 -16 -28.0341 87.6287 2
 4 -5 -16 159.196 152.202 3
 4 -5 -15 470.431 168.591 2
 4 -5 -15 413.959 208.164 3
 4 5 -15 605.337 240.082 2
 4 5 -14 1740.83 394.944 2
 4 -5 -14 1780.56 335.115 2
 4 -5 -14 1839.13 408.227 3
 4 -5 -13 586.801 227.425 3
 4 -5 -13 382.765 141.51 2
 4 5 -13 124.799 106.123 2
 4 -5 -12 1359.15 251.585 2
 -4 -5 12 2015.5 234.772 5
 4 5 -12 1611.83 336.491 2
 -4 -5 11 5189.88 379.418 5
 4 5 -11 5200.44 578.063 2
 4 -5 -11 5232.49 469.486 2
 -4 -5 10 2424.82 258.981 5
 4 5 -10 2992.34 414.025 2
 4 -5 -10 2336.99 290.033 2
 -4 -5 9 1625.45 212.416 5
 4 5 -9 1699.27 298.18 2
 -4 -5 8 18102 721.915 5
 -4 -5 7 4765.63 378.746 5
 -4 -5 6 77.782 51.3097 5
 -4 -5 5 8379.77 518.656 5
 -4 -5 5 8155.23 242.502 1
 -4 -5 4 19370 798.751 5
 -4 -5 4 19010.9 439.525 1
 -4 -5 3 21719.4 867.139 5
 -4 -5 3 20438.8 526.367 1
 -4 -5 2 5708.73 311.724 1
 -4 -5 2 6244.26 471.482 5
 -4 -5 1 16085.7 770.381 5
 -4 -5 1 17469 753.573 4
 -4 -5 0 194.716 97.376 4
 -4 -5 0 13.02 49.2061 5
 -4 -5 -1 1079.21 214.447 4
 -4 -5 -1 1207.34 211.478 5
 -4 -5 -2 2003.16 307.167 4
 -4 -5 -2 2218.69 294.02 5
 4 -5 3 1304.12 125.493 5
 -4 -5 -3 1307.34 233.275 5
 4 -5 3 1147.26 155.052 4
 4 -5 4 811.015 88.107 5
 4 -5 4 607.776 119.272 4
 -4 -5 -4 924.823 196.071 5
 -4 5 -4 628.39 177.955 2
 -4 -5 -5 3469.08 384.471 5
 4 -5 5 3818.65 164.254 5
 -4 5 -5 3863.75 452.864 2
 -4 -5 -6 2677 340.459 5
 4 5 6 3717.11 403.218 1
 -4 5 -6 3434.96 457.93 2
 4 5 7 534.007 161.622 1
 -4 -5 -7 759.871 194.701 5
 -4 5 -7 555.225 194.335 2
 4 5 8 861.415 216.505 1
 -4 -5 -8 713.409 184.543 5
 -4 5 -8 691.99 222.794 2
 -4 -5 -9 3101.18 383.378 5
 -4 5 -9 3228.45 502.45 2
 -4 5 -10 89.5799 114.113 2
 4 -5 11 107.841 103.128 1
 -4 5 -11 64.439 86.7 2
 4 -5 12 303.761 151.682 1
 -4 5 -12 388.479 185.184 2
 4 -5 13 783.686 237.88 1
 -4 5 -13 965.289 307.316 2
 -4 5 -14 531.543 255.057 2
 -4 5 -15 276.098 180.443 2
 -4 -5 -16 196.446 178.257 4
 4 -6 -18 243.113 189.142 3
 4 6 -17 532.49 230.571 2
 4 -6 -17 638.841 289.86 3
 4 6 -16 238.705 148.687 2
 4 -6 -16 175.797 149.696 3
 4 -6 -15 514.329 239.674 3
 4 6 -15 345.942 188.599 2
 4 -6 -14 -44.2803 70.9108 2
 4 6 -14 92.5193 144.073 2
 4 -6 -14 -20.8063 111.802 3
 4 -6 -13 1037.11 235.899 2
 4 6 -13 1048.82 298.528 2
 4 -6 -13 1393.53 347.962 3
 -4 -6 12 494.981 113.778 5
 4 -6 -12 431.267 142.519 2
 4 6 -12 311.27 161.51 2
 -4 -6 11 154.329 75.5138 5
 4 -6 -11 50.8664 50.9016 2
 4 6 -11 71.1384 111.531 2
 -4 -6 10 1101.71 178.962 5
 4 -6 -10 816.259 170.411 2
 4 6 -10 956.39 249.738 2
 4 6 -9 1728.09 302.441 2
 -4 -6 9 1995.22 249.049 5
 -4 -6 8 1136.19 189.272 5
 -4 -6 7 23.759 47.4413 5
 -4 -6 6 4634.61 399.598 5
 -4 -6 5 5458.42 448.876 5
 -4 -6 5 5930.68 240.66 1
 -4 -6 4 7354.66 530.767 5
 -4 -6 4 7484.19 306.626 1
 -4 -6 3 5071.76 445.809 5
 -4 -6 3 4554.96 270.749 1
 -4 -6 2 936.597 189.357 5
 -4 -6 2 1184.02 200.058 4
 -4 -6 1 581.124 157.384 5
 -4 -6 1 647.431 156.617 4
 -4 -6 0 22328 987.25 5
 -4 -6 0 22113.3 949.646 4
 -4 -6 -1 24100.5 1033.04 5
 -4 -6 -1 24350.4 1055.7 4
 -4 -6 -2 11985.4 733.809 5
 -4 -6 -2 11790 767.454 4
 -4 -6 -3 4871.55 471.791 5
 4 -6 3 4054.75 279.779 4
 4 -6 4 283.841 60.3328 5
 4 -6 4 227.749 71.2262 4
 -4 -6 -4 247.225 100.399 5
 -4 6 -4 237.085 106.909 2
 4 -6 5 646.072 79.4249 5
 -4 -6 -5 713.24 187.441 5
 -4 6 -5 762.503 209.548 2
 4 -6 6 45.069 17.3515 5
 4 -6 6 29.415 17.9545 5
 -4 -6 -6 -15.6865 50.7325 5
 -4 6 -6 122.063 117.831 2
 -4 -6 -7 350.907 123.114 5
 -4 6 -7 536.297 203.987 2
 -4 -6 -8 767.88 197.423 5
 -4 6 -8 627.833 214.88 2
 -4 -6 -9 108.495 69.7722 5
 -4 6 -9 68.917 122.405 2
 -4 -6 -10 83.6074 76.8039 5
 -4 6 -10 183.107 103.795 2
 -4 6 -11 360.045 181.116 2
 4 -6 12 602.511 201.493 1
 -4 6 -12 956.164 312.895 2
 4 -6 13 892.978 253.701 1
 -4 6 -13 1218.68 386.62 2
 -4 6 -14 505.462 261.721 2
 -4 -6 -16 0.43367 72.929 4
 4 -7 -18 146.233 160.144 3
 4 7 -17 1000.24 349.746 2
 4 -7 -17 1525.26 441.914 3
 4 7 -16 235.456 160.871 2
 4 -7 -16 668.239 294.01 3
 4 7 -15 447.845 219.031 2
 4 -7 -15 656.214 261.155 3
 4 -7 -14 2450.04 495.725 3
 4 7 -14 2624.1 492.977 2
 4 -7 -13 1839.04 407.907 3
 4 7 -13 1798.74 392.433 2
 -4 -7 12 762.947 151.626 5
 4 7 -12 715.232 242.782 2
 4 -7 -12 1013.46 283.615 3
 4 -7 -12 563.367 158.159 2
 -4 -7 11 882.166 164.934 5
 4 -7 -11 1005.08 194.087 2
 4 7 -11 662.852 224.162 2
 -4 -7 10 481.189 130.59 5
 4 7 -10 371.607 154.998 2
 4 -7 -10 381.705 107.968 2
 4 7 -9 1752.45 314.313 2
 -4 -7 9 1594.87 106.145 1
 -4 -7 9 1751.43 249.438 5
 -4 -7 8 2042.66 275.381 5
 4 7 -8 1630.75 297.927 2
 -4 -7 7 -30.9162 69.5893 5
 -4 -7 6 1809.6 269.647 5
 -4 -7 5 746.778 174.445 5
 -4 -7 4 -4.62172 72.4537 5
 -4 -7 3 590.899 158.892 5
 -4 -7 2 6736.17 559.637 5
 -4 -7 2 6933.12 488.861 4
 -4 -7 1 29896.6 1195.63 5
 -4 -7 1 29772.1 1077.67 4
 -4 -7 0 6336.5 530.337 4
 -4 -7 0 7229.2 593.612 5
 -4 -7 -1 2417.28 344.405 5
 -4 -7 -1 2750.44 366.591 4
 -4 -7 -2 5509.27 531.906 5
 -4 -7 -2 5575.59 545.892 4
 -4 -7 -3 10122.2 723.718 5
 -4 -7 -4 2160.49 342.41 5
 -4 7 -4 2291.46 346.864 2
 4 -7 4 2011.98 194.525 4
 -4 -7 -5 985.489 232.247 5
 -4 7 -5 782.946 212.638 2
 4 -7 6 12424.8 448.71 5
 -4 -7 -6 12652.4 845.075 5
 -4 7 -6 13016.6 915.535 2
 -4 -7 -7 1874.14 328.793 5
 -4 7 -7 1772.25 363.291 2
 -4 -7 -8 1175.2 266.533 5
 -4 7 -8 1166.95 302.029 2
 -4 -7 -9 169.533 122.806 5
 -4 7 -9 179.621 154.904 2
 -4 -7 -10 3115.35 439.743 5
 -4 7 -10 3534.76 564.202 2
 -4 7 -11 1607.2 408.35 2
 4 -7 12 -57.9538 86.9866 1
 -4 7 -12 -24.3732 75.887 2
 4 -7 13 170.082 111.875 1
 -4 7 -13 1.77339 145.72 2
 -4 7 -14 213.904 168.493 2
 4 -8 -17 159.107 129.779 3
 4 8 -16 42.7856 137.328 2
 4 -8 -16 304.243 202.318 3
 4 -8 -15 827.533 292.36 3
 4 8 -15 187.082 162.816 2
 4 8 -14 -19.8518 123.13 2
 4 -8 -14 -6.15961 130.139 3
 4 -8 -13 179.389 144.935 3
 4 8 -13 193.32 89.1888 2
 4 -8 -12 -50.6051 69.5652 3
 4 8 -12 302.237 173.767 2
 -4 -8 11 564.573 139.817 5
 4 -8 -11 920.179 181.157 2
 4 8 -11 985.391 279.475 2
 -4 -8 10 507.297 133.529 5
 4 -8 -10 210.588 81.8263 2
 4 8 -10 188.717 114.578 2
 -4 -8 9 1591.85 248.353 5
 4 -8 -9 1871.98 218.509 2
 4 8 -9 1849.13 332.927 2
 -4 -8 8 181.056 92.9697 5
 4 8 -8 364.112 150.651 2
 -4 -8 7 5284.09 477.017 5
 4 8 -7 5655.86 523.4 2
 -4 -8 6 27.6588 47.4065 5
 -4 -8 5 2846.45 367.876 5
 -4 -8 4 1456.36 280.678 5
 -4 -8 3 39.9923 57.8619 5
 -4 -8 2 4710.3 496.642 5
 -4 -8 2 5206.49 438.42 4
 -4 -8 1 2216.1 341.076 5
 -4 -8 1 2316.19 312.176 4
 -4 -8 0 2407.51 363.778 5
 -4 -8 0 2404 339.829 4
 -4 -8 -1 565.645 159.323 4
 -4 -8 -1 514.138 163.529 5
 -4 -8 -2 8852.79 707.431 5
 -4 -8 -3 8200.82 689.699 5
 4 -8 4 219.125 61.336 4
 -4 -8 -4 16.3372 45.7961 5
 -4 8 -4 98.9186 103.5 2
 -4 -8 -5 3052.82 428.251 5
 -4 8 -5 2536.88 399.101 2
 4 -8 6 7803.03 424.095 5
 -4 -8 -6 8008.2 702.863 5
 -4 -8 -7 288.323 136.963 5
 -4 8 -7 178.756 109.279 2
 -4 -8 -8 1407 319.505 5
 -4 8 -8 1628.14 383.144 2
 -4 -8 -9 1922.72 361.508 5
 -4 8 -9 2123.65 423.855 2
 -4 -8 -10 -40.5809 64.0215 5
 -4 8 -10 0.58045 95.3928 2
 -4 8 -11 713.191 283.168 2
 -4 8 -12 606.151 263.918 2
 -4 8 -13 1193.45 366.644 2
 -4 8 -14 105.987 156.29 2
 4 9 -16 206.501 151.948 2
 4 -9 -16 249.798 191.931 3
 4 -9 -15 216.479 225.474 3
 4 9 -15 124.413 130.732 2
 4 -9 -14 1167.96 355.873 3
 4 9 -14 1870.98 447.521 2
 4 -9 -13 127.884 115.946 3
 4 9 -13 4.5684 112.143 2
 4 -9 -12 661.437 233.825 3
 4 9 -12 204.447 152.408 2
 -4 -9 11 1085.67 206.822 5
 4 -9 -11 1487.29 362.973 3
 4 9 -11 1629.59 349.691 2
 -4 -9 10 1081.78 213.133 5
 4 9 -10 1463.82 321.876 2
 -4 -9 9 294.171 123.971 5
 4 9 -9 244.446 128.072 2
 4 -9 -9 119.978 53.9832 2
 -4 -9 8 3819.69 415.813 5
 4 9 -8 4883.76 521.311 2
 4 9 -7 1711.87 291.939 2
 -4 -9 7 1649.86 281.448 5
 -4 -9 6 3625.07 428.494 5
 -4 -9 5 357.48 149.976 5
 -4 -9 4 1050.25 241.446 5
 -4 -9 3 5335.69 552.983 5
 -4 -9 3 5792.03 455.905 4
 -4 -9 2 345.148 125.993 4
 -4 -9 2 242.694 103.904 5
 -4 -9 1 509.734 154.235 4
 -4 -9 1 763.776 210.486 5
 -4 -9 0 283.1 122.42 4
 -4 -9 0 179.632 106.059 5
 -4 -9 -1 2205.48 349.532 4
 -4 -9 -1 2307.17 375.565 5
 -4 -9 -2 302.965 146.302 5
 -4 -9 -3 1895.48 356.081 5
 4 -9 4 450.579 83.4173 4
 -4 -9 -4 577.271 201.983 5
 -4 9 -4 445.413 153.057 2
 -4 -9 -5 12045.7 899.789 5
 -4 9 -5 12250.1 879.318 2
 4 -9 5 10932.9 621.242 5
 4 -9 6 270.557 89.4405 5
 -4 -9 -6 185.915 116.559 5
 -4 9 -6 238.291 145.642 2
 -4 -9 -7 109.228 115.933 5
 -4 9 -7 -40.9698 53.6466 2
 -4 -9 -8 812.961 239.577 5
 -4 9 -8 1075.51 293.67 2
 -4 -9 -9 874.2 254.824 5
 -4 9 -9 1019.71 314.865 2
 -4 -9 -10 1084.04 288.552 5
 -4 9 -10 1191.28 341.635 2
 -4 9 -11 1099.49 341.404 2
 -4 9 -12 344.388 222.269 2
 -4 9 -13 1819.03 470.027 2
 4 10 -16 56.13 106.708 2
 4 -10 -16 53.1623 76.5373 3
 4 10 -15 193.437 167.695 2
 4 -10 -15 55.3368 99.3663 3
 4 10 -14 -64.3149 115.352 2
 4 -10 -14 -19.715 82.5894 3
 4 -10 -13 2432.94 514.373 3
 4 10 -13 2499.09 488.715 2
 4 -10 -12 79.0773 145.853 3
 4 10 -12 -18.446 129.798 2
 4 -10 -11 3878.39 597.19 3
 -4 -10 11 3121.49 366.911 5
 4 10 -11 3297.31 507.591 2
 -4 -10 10 239.949 109.163 5
 4 -10 -10 400.617 205.658 3
 4 10 -10 111.374 110.848 2
 -4 -10 9 2451.23 345.594 5
 4 10 -9 2457.48 401.467 2
 -4 -10 8 2764.41 379.408 5
 4 10 -8 3014.5 416.328 2
 -4 -10 7 12022.4 809.404 5
 4 10 -7 13215.8 837.048 2
 -4 -10 6 3998.61 472.153 5
 4 10 -6 4030.95 431.141 2
 -4 -10 5 46.197 71.3643 5
 -4 -10 4 2602.68 404.812 5
 -4 -10 3 9990.69 785.188 5
 -4 -10 3 10381.6 633.301 4
 -4 -10 2 -9.85821 32.1981 4
 -4 -10 2 -43.8213 92.2361 5
 -4 -10 1 1483.55 274.197 4
 -4 -10 1 1544.45 311.673 5
 -4 -10 0 29.0408 70.0837 5
 -4 -10 0 3.23541 40.7658 4
 -4 -10 -1 77.6913 78.5162 4
 -4 -10 -1 148.431 114.927 5
 -4 -10 -2 160.47 122.325 5
 -4 -10 -3 14993.7 1030.7 5
 -4 10 -4 2084.28 352.34 2
 -4 -10 -4 1653.54 334.273 5
 -4 -10 -5 490.644 190.764 5
 4 -10 5 303.012 100.858 5
 -4 10 -5 412.523 190.596 2
 4 -10 6 2480.04 296.153 5
 -4 -10 -6 2589.82 440.639 5
 -4 10 -6 2667.79 439.815 2
 -4 -10 -7 -52.6169 68.8382 5
 -4 10 -7 81.6295 105.86 2
 -4 -10 -8 827.351 253.739 5
 -4 10 -8 1635.05 374.322 2
 -4 -10 -9 214.969 122.108 5
 -4 10 -9 133 143.203 2
 -4 -10 -10 841.417 272.71 5
 -4 10 -10 889.447 301.359 2
 -4 10 -11 51.6644 99.3226 2
 -4 10 -12 1061.97 373.161 2
 -4 10 -13 763.586 312.083 2
 4 11 -15 258.737 218.244 2
 4 -11 -15 501.282 250.607 3
 4 11 -14 199.52 134.93 2
 4 -11 -14 202.637 165.304 3
 4 -11 -13 207.75 143.162 3
 4 11 -13 -15.8958 90.8219 2
 4 -11 -12 63.5593 94.4853 3
 4 11 -12 -29.2819 72.6157 2
 4 11 -11 1735.14 379.587 2
 -4 -11 11 1319.32 254.417 5
 4 -11 -11 1833.77 433.735 3
 -4 -11 10 154.298 111.321 5
 4 -11 -10 116.763 83.2938 3
 4 11 -10 16.6547 84.7379 2
 4 11 -9 2047.08 374.8 2
 -4 -11 9 2158.34 335.106 5
 4 -11 -9 2348.39 442.609 3
 -4 -11 8 5382.15 551.445 5
 4 11 -8 5422 577.685 2
 -4 -11 7 10270.5 779.002 5
 4 11 -7 9771.07 735.351 2
 -4 -11 6 5078.14 560.784 5
 4 11 -6 3855.57 443.807 2
 4 11 -5 345.116 115.756 2
 -4 -11 5 351.603 163.92 5
 -4 -11 4 2994.11 441.673 5
 4 11 -4 3022.68 343.314 2
 -4 -11 3 118.268 74.8615 5
 -4 -11 3 129.366 78.2256 4
 -4 -11 2 1129.19 231.85 4
 -4 -11 2 1519.14 323.203 5
 -4 -11 1 -11.5487 56.5551 4
 -4 -11 1 189.874 139.812 5
 -4 -11 0 -166.31 104.862 4
 -4 -11 0 78.5106 99.7114 5
 -4 -11 -1 1463.6 316.915 4
 -4 -11 -1 1972.42 381.692 5
 -4 -11 -2 722.824 239.86 5
 -4 -11 -3 791.226 251.078 5
 -4 11 -4 3665.32 474.811 2
 -4 -11 -4 3639.98 551.52 5
 4 -11 5 4094.87 442.723 5
 -4 11 -5 4504.48 554.257 2
 -4 -11 -5 4507.56 615.529 5
 -4 -11 -6 161.43 60.3018 5
 -4 11 -6 125.175 96.6589 2
 -4 -11 -7 1079.63 302.272 5
 -4 11 -7 818.689 256.543 2
 -4 -11 -8 249.584 131.24 5
 -4 11 -8 228.443 156.421 2
 -4 -11 -9 340.574 175.154 5
 -4 11 -9 342.25 184.806 2
 -4 -11 -10 -311.24 172.93 5
 -4 11 -10 158.422 123.73 2
 -4 11 -11 2780.87 553.647 2
 -4 11 -12 104.379 140.818 2
 4 -12 -15 257.869 222.225 3
 4 12 -15 307.21 193.31 2
 4 12 -14 407.52 217.353 2
 4 -12 -14 1014.78 375.179 3
 4 12 -13 51.6992 84.8334 2
 4 -12 -13 -70.2722 129.42 3
 4 12 -12 2213.72 464.653 2
 4 -12 -12 2676.29 548.855 3
 4 -12 -11 82.3827 145.398 3
 4 12 -11 -28.1102 61.3921 2
 -4 -12 10 4058.47 482.05 5
 4 -12 -10 4253.46 646.23 3
 4 12 -10 3680.51 541.125 2
 -4 -12 9 -93.7169 105.948 5
 4 -12 -9 12.1417 58.8358 3
 4 12 -9 41.1271 83.1384 2
 -4 -12 8 643.844 198.847 5
 4 -12 -8 595.189 236.097 3
 4 12 -8 294.299 157.761 2
 4 -12 -7 7865.06 769.752 3
 -4 -12 7 8239.19 729.561 5
 4 12 -7 7468.43 668.349 2
 -4 -12 6 1365.17 313.6 5
 4 12 -6 2001.2 334.412 2
 -4 -12 5 4375.82 552.961 5
 4 12 -5 3787.39 429.446 2
 -4 -12 4 9562.62 840.247 5
 4 12 -4 10100.9 655.049 2
 -4 -12 3 606.789 167.905 4
 4 12 -3 700.728 181.648 2
 -4 -12 3 539.64 153.054 5
 -4 -12 2 1809.14 302.275 4
 -4 -12 2 2032.11 401.831 5
 -4 -12 1 441.384 149.216 4
 -4 -12 1 593.509 227.479 5
 -4 -12 0 9047.88 847.5 5
 -4 -12 0 9984.65 800.746 4
 -4 -12 -1 631.723 209.389 4
 -4 -12 -1 619.039 239.366 5
 -4 -12 -2 2952.3 496.442 5
 -4 -12 -3 117.46 121.621 5
 -4 -12 -4 4040.29 603.552 5
 -4 12 -5 137.491 100.449 2
 4 -12 5 306.58 122.14 5
 -4 -12 -6 176.092 102.863 5
 -4 12 -6 46.6233 85.6095 2
 -4 -12 -7 1512.37 384.784 5
 -4 12 -7 2096.05 425.046 2
 -4 -12 -8 1231.93 339.35 5
 -4 12 -8 1083.44 311.666 2
 -4 -12 -9 191.266 138.138 5
 -4 12 -9 79.2463 97.9301 2
 -4 -12 -10 101.079 84.9175 5
 -4 12 -10 189.403 184.785 2
 -4 -12 -11 262.418 171.666 5
 -4 12 -11 336.347 192.809 2
 -4 12 -12 562.453 262.767 2
 4 13 -14 -361.803 212.227 2
 4 -13 -14 542.588 287.049 3
 4 13 -13 205.739 146.616 2
 4 -13 -13 439.841 228.178 3
 4 -13 -12 1340.27 396.339 3
 4 13 -12 1198.57 343.904 2
 4 -13 -11 568.328 259.289 3
 4 13 -11 361.766 193.933 2
 -4 -13 10 184.929 110.431 5
 4 -13 -10 193.556 163.36 3
 4 13 -10 71.5552 93.0616 2
 4 13 -9 815.167 261.305 2
 4 -13 -9 410.682 211.982 3
 -4 -13 9 491.468 176.684 5
 -4 -13 8 1366.57 306.494 5
 4 -13 -8 1171.15 325.903 3
 4 13 -8 1550.48 339.349 2
 4 -13 -7 7300.23 771.647 3
 -4 -13 7 7037.91 709.577 5
 4 13 -7 5504.8 587.292 2
 4 -13 -6 47.5122 121.584 3
 -4 -13 6 85.8732 99.9317 5
 4 13 -6 -42.4137 57.78 2
 4 -13 -5 459.128 185.162 3
 -4 -13 5 128.572 102.786 5
 4 13 -5 592.227 171.749 2
 4 -13 -4 15.9797 85.5064 3
 -4 -13 4 -56.6055 137.729 5
 4 13 -4 -31.5445 54.0691 2
 -4 -13 3 17749.1 1199.68 5
 4 13 -3 18344.9 854.669 2
 -4 -13 3 18892.7 958.578 4
 -4 -13 2 -13.8625 49.5146 4
 -4 -13 2 -41.0272 109.949 5
 4 13 -2 7.52591 31.8621 2
 -4 -13 1 227.993 118.449 5
 4 -13 -1 68.4326 76.6158 3
 -4 -13 1 205.939 117.206 4
 4 13 -1 158.027 68.1869 2
 -4 -13 0 28.3499 104.301 4
 4 -13 0 61.6895 44.2311 3
 -4 -13 0 275.641 166.039 5
 -4 -13 -1 1167.13 293.449 4
 4 -13 1 1267.67 220.073 3
 -4 -13 -1 1452.45 349.649 5
 -4 -13 -2 902.556 267.096 4
 -4 -13 -2 979.256 307.198 5
 -4 -13 -3 2554.35 474.855 5
 -4 -13 -4 3040.59 528.406 5
 4 -13 4 2540.87 402.816 5
 -4 13 -5 203.684 145.802 2
 -4 -13 -5 430.833 193.729 5
 4 -13 5 113.43 79.3024 5
 -4 -13 -6 64.9274 82.5621 5
 -4 13 -6 82.032 69.5691 2
 -4 -13 -7 1859.04 430.985 5
 -4 13 -7 2056.35 417.884 2
 -4 -13 -8 896.428 297.764 5
 -4 13 -8 1112.95 331.347 2
 -4 -13 -9 164.848 137.342 5
 -4 13 -9 144.487 142.786 2
 -4 -13 -10 55.7215 98.9298 5
 -4 13 -10 81.1531 148.155 2
 -4 -13 -11 434.724 219.387 5
 -4 13 -11 641.085 289.203 2
 4 14 -14 488.851 258.73 2
 4 14 -13 341.882 195.245 2
 4 -14 -13 892.784 366.952 3
 4 14 -12 287.675 163.652 2
 4 -14 -12 795.728 325.956 3
 4 14 -11 291.059 173.48 2
 4 -14 -11 3.69645 93.1456 3
 4 -14 -10 -208.054 194.723 3
 4 14 -10 142.474 170.541 2
 -4 -14 10 -4.40153 91.5078 5
 4 -14 -9 286.456 216.64 3
 -4 -14 9 60.544 73.066 5
 4 14 -9 329.796 194.693 2
 4 -14 -8 5103.5 702.518 3
 -4 -14 8 4555.57 578.606 5
 4 14 -8 4311.68 563.031 2
 4 -14 -7 -93.6247 86.8094 3
 -4 -14 7 -49.2994 77.5287 5
 4 14 -7 -24.5447 51.4495 2
 4 14 -6 27.4439 41.9033 2
 4 -14 -6 113.795 122.601 3
 -4 -14 6 -83.5921 137.836 5
 4 -14 -5 9538.89 848.563 3
 -4 -14 5 9147.93 868.372 5
 4 14 -5 10330.8 752.726 2
 -4 -14 4 3472.36 542.254 5
 4 -14 -4 4271.94 542.07 3
 4 14 -4 3498.19 414.028 2
 -4 -14 3 602.593 172.89 4
 4 -14 -3 792.799 239.788 3
 -4 -14 3 534.247 217.214 5
 4 14 -3 470.883 139.585 2
 -4 -14 2 1491.49 367.384 5
 -4 -14 2 936.379 237.049 4
 4 -14 -2 1306.85 280.027 3
 4 14 -2 944.556 187.741 2
 4 -14 -1 3091.37 402.578 3
 -4 -14 1 2786.91 493.995 5
 -4 -14 1 3586.57 484.215 4
 -4 -14 0 48.6532 75.7027 4
 4 -14 0 66.876 55.2869 3
 -4 -14 0 15.9918 84.935 5
 -4 -14 -1 954.166 274.19 4
 -4 -14 -1 978.673 318.645 5
 -4 -14 -2 4482.92 657.074 5
 -4 -14 -2 3783.95 570.321 4
 -4 -14 -3 2243.18 459.299 5
 -4 -14 -4 494.214 256.026 5
 4 -14 4 355.361 162.567 5
 -4 -14 -5 116.518 119.265 5
 4 -14 5 202.917 126.896 5
 -4 14 -6 -1.56287 56.0077 2
 -4 -14 -6 -74.3751 97.0128 5
 -4 14 -7 180.213 133.239 2
 -4 -14 -7 351.891 210.184 5
 -4 -14 -8 1280.49 377.326 5
 -4 14 -8 1034.93 332.767 2
 -4 -14 -9 58.6911 54.4805 5
 -4 14 -9 177.878 141.023 2
 -4 -14 -10 684.303 294.816 5
 -4 14 -10 274.159 166.68 2
 -4 -14 -11 -116.602 128.501 5
 -4 14 -11 55.0799 115.985 2
 4 15 -13 -54.4694 99.2719 2
 4 15 -12 303.166 177.799 2
 4 -15 -12 333.703 220.004 3
 4 -15 -11 380.118 217.863 3
 4 15 -11 212.824 152.586 2
 4 -15 -10 1547.56 420.971 3
 4 15 -10 1075.94 317.156 2
 4 -15 -9 618.476 260.063 3
 4 15 -9 455.629 195.756 2
 -4 -15 9 421.502 180.227 5
 4 15 -8 93.1927 95.7362 2
 -4 -15 8 288.738 160.713 5
 4 -15 -8 57.8882 58.7432 3
 4 -15 -7 74.1072 94.0566 3
 4 15 -7 433.57 169.802 2
 -4 -15 7 353.897 193.283 5
 4 -15 -6 756.156 256.865 3
 4 15 -6 919.761 243.666 2
 -4 -15 6 1252.4 328.321 5
 4 -15 -5 1678.26 373.719 3
 4 15 -5 940.362 234.941 2
 -4 -15 5 1006 294.577 5
 4 15 -4 1553.37 291.022 2
 -4 -15 4 1221.79 343.742 5
 4 -15 -4 1208.06 298.758 3
 -4 -15 3 1027.67 240.004 4
 4 -15 -3 1115.86 281.308 3
 -4 -15 3 1148.42 327.857 5
 -4 -15 2 2516.19 397.259 4
 4 -15 -2 2435.98 394.938 3
 -4 -15 2 2470.61 487.298 5
 -4 -15 1 858.394 271.426 5
 -4 -15 1 987.015 270.78 4
 4 -15 -1 967.935 236.581 3
 -4 -15 0 335.11 181.087 4
 4 -15 0 72.1913 52.2046 3
 -4 -15 0 399.488 242.506 5
 -4 -15 -1 655.896 235.35 4
 -4 -15 -1 1224.4 368.355 5
 -4 -15 -2 282.016 124.808 4
 -4 -15 -2 507.49 268.995 5
 -4 -15 -3 -27.5097 68.4786 4
 -4 -15 -3 8.53152 130.242 5
 4 -15 3 77.9433 54.6011 5
 -4 -15 -4 1013.01 344.772 5
 4 -15 4 485.568 196.333 5
 -4 -15 -5 242.562 150.823 5
 -4 -15 -6 305.708 177.529 5
 -4 15 -7 -167.939 149.454 2
 -4 -15 -7 -144.545 134.501 5
 -4 15 -8 205.517 146.841 2
 -4 -15 -8 111.945 162.05 5
 -4 15 -9 75.1347 55.6293 2
 -4 -15 -9 72.693 113.039 5
 -4 15 -10 514.768 275.257 2
 -4 -15 -10 390.44 241.899 5
 -4 -15 -11 317.686 207.723 5
 4 16 -13 523.694 255.302 2
 4 16 -12 2.8386 61.5366 2
 4 -16 -12 220.95 188.637 3
 4 -16 -11 137.68 149.061 3
 4 16 -11 45.7924 88.7861 2
 4 16 -10 165.736 113.014 2
 4 -16 -10 180.23 161.095 3
 4 16 -9 559.316 229.963 2
 4 -16 -9 411.564 220.805 3
 -4 -16 9 398.528 183.382 5
 4 -16 -8 87.9216 83.855 3
 -4 -16 8 146.105 118.278 5
 4 -16 -7 293.018 189.113 3
 4 16 -7 46.0484 94.6682 2
 -4 -16 7 51.7307 69.469 5
 4 -16 -6 581.181 239.007 3
 4 16 -6 308.961 154.702 2
 -4 -16 6 275.113 187.153 5
 4 -16 -5 48.6037 110.093 3
 -4 -16 5 -76.1456 107.584 5
 4 -16 -4 2211.78 417.585 3
 -4 -16 4 2484.36 492.894 5
 4 -16 -3 1070.99 282.518 3
 -4 -16 3 1400.25 368.291 5
 -4 -16 2 -19.6191 61.2233 4
 -4 -16 2 86.9111 84.3336 5
 4 -16 -2 60.1058 85.9717 3
 -4 -16 1 222.136 103.72 4
 4 -16 -1 198.89 99.8928 3
 -4 -16 1 81.3541 78.2965 5
 -4 -16 0 55.7322 71.4329 4
 -4 -16 0 130.309 115.111 5
 -4 -16 -1 312.043 145.071 4
 -4 -16 -1 196.78 135.017 5
 -4 -16 -2 355.157 193.279 4
 -4 -16 -2 662.418 267.265 5
 -4 -16 -3 668.841 262.154 4
 -4 -16 -3 430.13 218.825 5
 4 -16 3 463.735 213.866 5
 -4 -16 -4 479.936 251.809 5
 4 -16 4 674.145 242.392 5
 -4 -16 -5 38.4501 93.8952 5
 -4 -16 -6 253.18 223.931 5
 -4 -16 -7 316.645 148.631 5
 -4 -16 -8 896.133 338.314 5
 -4 16 -9 1183.72 370.401 2
 -4 -16 -9 536.476 266.751 5
 -4 16 -10 -27.8896 80.4718 2
 -4 -16 -10 380.598 244.983 5
 4 17 -12 308.644 184.689 2
 4 17 -11 39.1665 112.087 2
 4 -17 -11 203.577 165.913 3
 4 17 -10 372.744 171.936 2
 4 -17 -10 299.202 179.555 3
 4 17 -9 63.7221 73.0904 2
 4 -17 -9 66.7134 91.4258 3
 -4 -17 9 157.88 148.89 5
 4 17 -8 1200.48 319.772 2
 4 -17 -8 2033.65 493.28 3
 -4 -17 8 1924.63 423.684 5
 4 -17 -7 247.696 157.231 3
 -4 -17 7 454.513 219.754 5
 4 -17 -6 91.4118 100.403 3
 -4 -17 6 -34.6512 116.369 5
 4 -17 -5 224.989 134.367 3
 -4 -17 5 130.706 129.383 5
 4 -17 -4 -42.2459 87.0952 3
 -4 -17 4 -56.6259 116.774 5
 4 -17 -3 211.834 126.251 3
 -4 -17 3 13.6286 70.7596 5
 -4 -17 2 -4.166 105.76 5
 4 -17 -2 -218.728 130.267 3
 -4 -17 1 1918.26 470.984 5
 -4 -17 1 2174.76 409.593 4
 -4 -17 0 529.733 222.023 4
 -4 -17 0 452.67 211.375 5
 -4 -17 -1 -78.4387 112.268 4
 -4 -17 -1 161.951 143.207 5
 -4 -17 -2 968.178 301.074 4
 -4 -17 -2 718.754 292.119 5
 4 -17 2 147.267 164.123 5
 -4 -17 -3 175.474 162.397 4
 -4 -17 -3 85.7339 78.4688 5
 4 -17 3 -102.188 106.234 5
 -4 -17 -4 991.979 335.775 4
 -4 -17 -4 1329.07 404.11 5
 4 -17 4 796.469 279.692 5
 -4 -17 -5 15.5131 159.032 5
 -4 -17 -6 426.621 245.956 5
 -4 -17 -7 270.013 182.864 5
 -4 -17 -8 254.566 221.109 5
 -4 -17 -9 829.712 349.416 5
 4 18 -11 110.914 121.089 2
 4 18 -10 235.49 163.06 2
 4 -18 -10 -36.8322 93.8281 3
 4 -18 -9 259.994 175.489 3
 4 -18 -8 -199.298 161.92 3
 -4 -18 8 137.514 138.412 5
 4 -18 -7 -40.6321 85.508 3
 -4 -18 7 255.202 175.955 5
 4 -18 -6 308.022 187.171 3
 -4 -18 6 269.969 154.914 5
 4 -18 -5 814.482 292.384 3
 -4 -18 5 803.461 296.982 5
 4 -18 -4 201.606 119.249 3
 -4 -18 4 95.1414 127.142 5
 -4 -18 3 -44.5144 112.749 5
 -4 -18 2 580.416 270.439 5
 -4 -18 1 75.9829 177.604 5
 -4 -18 0 129.482 121.95 4
 -4 -18 0 63.0227 79.7781 5
 -4 -18 -1 168.982 102.81 4
 -4 -18 -1 240.033 137.456 5
 4 -18 1 210.239 160.225 5
 -4 -18 -2 -30.7475 88.3143 4
 -4 -18 -2 79.4339 165.861 5
 4 -18 2 75.4766 99.599 5
 -4 -18 -3 477.62 241.938 4
 -4 -18 -3 522.888 266.86 5
 4 -18 3 445.185 213.457 5
 -4 -18 -4 351.558 203.696 4
 -4 -18 -4 637.195 300.641 5
 -4 -18 -5 -311.98 207.98 4
 -4 -18 -5 -261.03 196.845 5
 -4 -18 -6 189.55 151.599 5
 -4 -18 -7 481.011 267.165 5
 4 -19 -9 -158.866 157.461 3
 -4 -19 8 94.7674 112.793 5
 4 -19 -8 -171.603 159.987 3
 4 -19 -7 -64.8109 98.9721 3
 -4 -19 7 -89.4802 105.603 5
 4 -19 -6 476.862 235.204 3
 -4 -19 6 288.616 192.726 5
 4 -19 -5 144.119 129.926 3
 -4 -19 5 94.4385 144.144 5
 -4 -19 4 261.489 184.94 5
 -4 -19 3 416.242 224.613 5
 -4 -19 2 74.489 81.3886 5
 -4 -19 1 -60.2673 83.6827 5
 -4 -19 0 15.3668 105.109 5
 4 -19 0 157.036 159.22 5
 -4 -19 -1 188.389 109.596 4
 -4 -19 -1 100.606 121.515 5
 4 -19 1 234.909 158.471 5
 -4 -19 -2 714.098 277.228 4
 -4 -19 -2 940.346 358.592 5
 4 -19 2 1060.24 355.745 5
 -4 -19 -3 143.924 139.898 4
 -4 -19 -3 114.023 150.95 5
 4 -19 3 430.222 215.67 5
 -4 -19 -4 -13.115 64.1488 4
 -4 -19 -4 176.306 137.653 5
 -4 -19 -5 8.45125 61.6174 4
 -4 -19 -5 821.229 346.76 5
 -4 -19 -6 1141.26 406.036 4
 4 -20 -8 86.7864 73.1459 3
 -4 -20 8 127.66 133.544 5
 -4 -20 7 -502.447 246.609 5
 4 -20 -7 -49.1367 95.4914 3
 4 -20 -6 163.174 212.44 3
 -4 -20 6 74.3463 140.745 5
 -4 -20 5 273.413 166.702 5
 -4 -20 4 -62.7326 81.4472 5
 -4 -20 3 529.056 257.521 5
 -4 -20 2 -310.835 213.096 5
 -4 -20 1 670.746 315.542 5
 4 -20 -1 858.621 357.845 5
 -4 -20 0 302.942 210.978 5
 4 -20 0 307.54 214.79 5
 -4 -20 -1 1762.74 506.121 5
 4 -20 1 1474.79 438.033 5
 -4 -20 -2 315.001 196.451 4
 4 -20 2 -0.39601 71.7817 5
 -4 -20 -3 -171.866 171.435 4
 -4 -20 -4 38.3986 99.597 4
 -4 -20 -5 812.009 327.87 4
 -4 -21 6 255.271 191.654 5
 -4 -21 5 223.466 166.848 5
 4 -21 -2 1906.48 547.515 5
 4 -21 -1 -162.18 168.984 5
 4 -21 0 -388.464 238.576 5
 4 -21 1 10.9387 66.171 5
 4 -21 2 503.058 280.743 5
 5 0 -19 333.431 190.675 2
 5 0 -18 -58.4404 114.341 2
 5 0 -17 540.003 222.348 2
 5 0 -16 63.5786 82.4745 3
 5 0 -16 21.7649 93.5849 2
 5 0 -15 5587.63 665.201 2
 5 0 -14 13.5818 76.4604 2
 5 0 -13 110.465 144.304 2
 -5 0 12 -5.17814 35.1198 5
 5 0 -12 60.2281 81.5368 2
 -5 0 11 7058.27 483.058 5
 -5 0 10 -39.7838 30.0463 5
 5 0 -9 6039.94 303.451 1
 -5 0 9 7356.96 454.054 5
 -5 0 8 17.3683 48.0981 5
 5 0 -8 28.5866 18.5426 1
 -5 0 7 21439.3 725.347 5
 -5 0 6 -98.7764 50.589 5
 -5 0 5 14196.5 553.829 5
 -5 0 4 7.56952 18.9648 5
 -5 0 3 30449.4 773.01 5
 -5 0 2 -0.8055 19.1765 5
 -5 0 1 13665.5 501.456 5
 -5 0 0 -1.9985 18.1504 5
 -5 0 -1 53678.3 972.219 5
 -5 0 -2 16.2277 32.6225 5
 5 0 2 34.1656 35.7516 5
 -5 0 -3 16830.2 514.777 5
 5 0 3 16243.4 597.299 5
 -5 0 -3 17158.3 796.746 4
 -5 0 -4 23.2163 27.5776 4
 -5 0 -4 -40.1241 26.3225 5
 5 0 4 -0.26239 14.5508 5
 -5 0 -5 21369.4 541.906 5
 -5 0 -5 20867.5 973.824 4
 -5 0 -6 -2.90746 18.5074 5
 -5 0 -6 -43.9505 55.1577 4
 5 0 6 27.1241 55.5385 1
 -5 0 -7 409.442 159.638 4
 -5 0 -7 541.955 75.9789 5
 5 0 7 561.528 167.523 1
 -5 0 -8 142.984 132.592 4
 5 0 8 -81.0676 109.073 1
 5 0 9 4126.64 491.018 1
 -5 0 -9 3844.22 511.167 4
 -5 0 -10 4.59239 62.3174 4
 5 0 10 295.436 148.029 1
 -5 0 -11 352.616 174.52 4
 5 0 11 487.263 198.461 1
 -5 0 -12 -116.039 113.565 4
 5 0 12 199.654 131.575 1
 5 0 13 2400.87 429.721 1
 5 0 14 41.9763 89.0058 1
 5 0 15 -155.855 117.714 1
 5 -1 -19 338.635 219.352 2
 5 1 -19 12.2133 81.0785 2
 5 1 -18 174.319 153.988 2
 5 -1 -18 164.983 142.073 2
 5 -1 -17 159.664 133.78 2
 5 -1 -17 252.336 187.272 3
 5 1 -17 49.6845 114.84 2
 5 -1 -16 363.422 186.828 2
 5 -1 -16 524.541 207.344 3
 5 1 -16 458.012 183.21 3
 5 1 -16 602.575 240.983 2
 5 -1 -15 60.7888 62.2245 2
 5 1 -15 -61.0177 76.9017 2
 5 -1 -14 68.9967 58.4563 2
 5 1 -14 41.8163 65.9507 2
 -5 -1 13 239.294 88.381 5
 5 1 -13 27.5347 84.8568 2
 5 -1 -13 245.206 145.014 2
 5 1 -12 10.2142 42.9671 2
 5 -1 -12 -55.3528 65.5886 2
 -5 -1 12 59.4035 40.3736 5
 -5 -1 11 651.383 136.963 5
 -5 1 11 690.215 159.942 5
 -5 -1 10 8696.76 500.152 5
 -5 1 10 8350.99 525.026 5
 5 1 -9 1552.08 131.406 1
 -5 1 9 1606.12 218.409 5
 -5 -1 9 1658.65 212.145 5
 -5 -1 8 60.5455 46.3686 5
 -5 1 8 60.6687 55.9148 5
 5 1 -8 74.0272 29.3086 1
 -5 -1 7 178.177 63.4517 5
 -5 1 7 198.568 74.0227 5
 -5 1 6 3739.17 294.861 5
 -5 -1 6 3536.14 289.686 5
 -5 1 5 1757.27 194.209 5
 -5 -1 5 1851.41 202.886 5
 -5 -1 4 3403.66 275.884 5
 -5 1 4 3345.5 261.953 5
 -5 -1 3 11715 506.37 5
 -5 1 3 12000.4 476.329 5
 -5 -1 2 1478.4 179.15 5
 -5 1 2 1485.06 164.272 5
 -5 1 1 463.612 91.0434 5
 -5 -1 1 506.942 108.017 5
 -5 1 0 11248.1 422.676 5
 -5 -1 0 11422.1 494.814 5
 -5 -1 -1 5006.6 326.155 5
 -5 1 -1 4901.48 268.787 5
 -5 -1 -2 1072.81 201.204 4
 5 -1 2 1323.47 155.772 5
 -5 1 -2 1084.99 122.231 5
 -5 -1 -2 1027.12 145.27 5
 -5 1 -3 5494.43 259.658 5
 -5 -1 -3 5765.28 344.075 5
 5 -1 3 5560.06 317.522 5
 -5 -1 -3 5492.22 472.037 4
 -5 1 -4 51.594 71.3315 4
 -5 -1 -4 41.8246 64.6017 4
 -5 1 -4 87.996 28.7995 5
 -5 -1 -4 67.6692 22.3218 5
 5 -1 4 102.999 44.1945 5
 -5 1 -5 815.822 189.186 4
 -5 1 -5 835.664 86.5173 5
 5 -1 5 739.926 106.087 5
 -5 -1 -5 693.404 115.668 5
 -5 -1 -5 538.457 152.649 4
 -5 -1 -6 5938.4 337.386 5
 5 1 6 6006.02 525.63 1
 -5 1 -6 5951.4 200.419 5
 -5 1 -6 5852.97 515.741 4
 -5 -1 -6 6487.12 593.574 4
 5 -1 7 3977.11 443.919 1
 -5 -1 -7 4097.38 272.968 5
 5 1 7 4578.71 476.246 1
 -5 1 -7 3652.07 428.229 4
 -5 -1 -7 4114.72 492.018 4
 -5 1 -8 848.865 215.026 4
 -5 -1 -8 1329.92 295.058 4
 5 1 8 858.45 211.586 1
 5 -1 8 788.772 202.456 1
 5 -1 9 8033.73 681.638 1
 5 1 9 8434.9 704.013 1
 -5 1 -9 8345.42 712.509 4
 -5 -1 -9 7809.44 740.151 4
 5 -1 10 1767.58 326.879 1
 -5 -1 -10 1433.65 330.52 4
 -5 1 -10 1542.51 316.605 4
 5 1 10 1376.29 290.219 1
 -5 1 -11 707.219 217.404 4
 -5 -1 -11 409.499 182.195 4
 5 1 11 741.253 226.805 1
 5 -1 11 530.797 189.215 1
 -5 -1 -12 339.511 151.21 4
 5 1 12 513.57 194.558 1
 5 -1 12 354.032 170.779 1
 5 -1 13 89.7363 83.0204 1
 -5 -1 -13 25.769 56.4467 4
 5 1 13 -75.7775 81.775 1
 5 -1 14 643.751 233.52 1
 5 1 14 195.601 119.949 1
 5 1 15 52.1603 81.4032 1
 5 -1 15 181.627 144.93 1
 5 -2 -19 148.041 134.302 2
 5 -2 -18 -65.4249 93.0483 2
 5 2 -18 -143.336 134.158 2
 5 -2 -18 174.443 157.198 3
 5 -2 -17 -184.698 135.765 2
 5 -2 -17 29.4186 82.7616 3
 5 2 -17 184.876 147.374 2
 5 -2 -16 635.714 256.691 3
 5 -2 -16 448.103 183.139 2
 5 2 -16 498.628 205.521 2
 5 -2 -15 -20.853 74.646 2
 5 2 -15 131.488 62.6985 2
 -5 -2 14 410.919 121.225 5
 5 -2 -14 485.777 165.614 2
 5 2 -14 405.675 156.184 2
 -5 -2 13 9421.39 574.243 5
 5 2 -13 8815 778.941 2
 5 -2 -13 10387.9 784.149 2
 5 2 -12 -47.8721 84.5262 2
 5 -2 -12 -4.9759 53.2941 2
 -5 -2 12 -9.02033 40.1615 5
 -5 -2 11 11310.5 581.62 5
 -5 -2 10 9.45338 27.26 5
 -5 -2 9 11153.7 551.773 5
 -5 2 9 10051.3 574.283 5
 -5 -2 8 29.6651 46.5662 5
 -5 2 8 -35.0871 33.4511 5
 -5 -2 7 610.929 125.805 5
 -5 2 7 731.923 143.008 5
 -5 2 6 244.64 75.1863 5
 -5 -2 6 137.183 57.4907 5
 -5 2 5 2845.26 259.938 5
 -5 -2 5 2217.02 236.002 5
 -5 2 4 51.4337 41.0993 5
 -5 -2 4 18.2594 28.4952 5
 -5 -2 3 605.014 121.59 5
 -5 2 3 508.907 98.4864 5
 -5 -2 2 1344.86 185.044 5
 -5 2 2 1116.16 144.771 5
 -5 2 1 315.061 77.135 5
 -5 -2 1 270.627 88.003 5
 -5 -2 0 11093 534.237 5
 -5 2 0 11632.4 420.521 5
 -5 2 -1 18944.3 517.697 5
 -5 -2 -1 19770.6 707.524 5
 -5 -2 -1 18979.1 833.537 4
 -5 -2 -2 236.593 118.083 4
 5 -2 2 127.151 50.2228 5
 -5 2 -2 92.0891 33.9696 5
 -5 -2 -2 193.574 70.057 5
 -5 -2 -3 18.0476 54.7141 4
 -5 2 -3 2.90288 17.068 5
 5 -2 3 2.30121 16.7573 5
 -5 -2 -3 3.10734 29.8607 5
 -5 -2 -4 11980.2 563.846 5
 5 -2 4 10920.8 398.298 5
 -5 2 -4 11971 332.727 5
 -5 -2 -4 13167.3 804.852 4
 -5 -2 -5 15.0304 75.1897 4
 -5 -2 -5 52.388 37.0691 5
 5 -2 5 227.569 51.3443 5
 -5 2 -5 161.832 32.9111 5
 -5 2 -5 52.8883 74.3616 4
 -5 2 -6 1346.52 237.637 4
 -5 -2 -6 1374.86 281.419 4
 5 2 6 934.239 203.424 1
 -5 -2 -6 1310.36 184.993 5
 -5 2 -7 469.824 147.727 4
 -5 -2 -7 245.089 135.567 4
 5 2 7 389.305 125.908 1
 -5 -2 -7 459.28 110.657 5
 -5 2 -8 1415.91 267.371 4
 -5 -2 -8 1394.43 309.27 4
 -5 -2 -8 1648.12 202.522 5
 5 -2 8 1489.4 288.625 1
 5 2 8 1290.16 260.752 1
 5 -2 9 3489.07 453.818 1
 5 2 9 3834.3 480.314 1
 -5 2 -9 3730.19 452.393 4
 -5 -2 -9 4521 583.044 4
 -5 -2 -10 1146.84 304.622 4
 5 2 10 1285.37 282.518 1
 -5 2 -10 1185.09 267.689 4
 5 -2 10 490.205 177.637 1
 -5 -2 -11 -54.6632 94.3753 4
 -5 2 -11 17.4513 54.0385 4
 5 -2 11 2.25209 60.2426 1
 5 2 11 22.3381 48.9329 1
 -5 -2 -12 380.041 178.687 4
 5 -2 12 440.193 170.511 1
 -5 -2 -13 491.446 222.011 4
 5 -2 13 359.546 165.193 1
 5 2 13 714.68 228.682 1
 -5 -2 -14 609.252 260.243 4
 5 -2 14 657.61 224.363 1
 5 2 14 824.853 252.59 1
 5 -2 15 83.2832 109.833 1
 5 -3 -18 44.3639 80.3111 2
 5 3 -18 368.737 185.87 2
 5 -3 -18 358.611 202.093 3
 5 -3 -17 -12.3204 78.4364 2
 5 -3 -17 108.132 151.489 3
 5 3 -17 169.131 137.42 2
 5 -3 -16 2088.64 437.878 3
 5 -3 -16 1581.31 357.75 2
 5 3 -16 1895.84 414.354 2
 5 -3 -15 1330.76 335.522 3
 5 -3 -15 1246.18 306.35 2
 5 3 -15 1191.68 322.791 2
 5 -3 -14 29.2635 65.5118 2
 5 3 -14 150.293 125.97 2
 -5 -3 13 5391.8 422.458 5
 5 3 -13 5106.92 597.24 2
 5 -3 -13 5049.72 540.566 2
 -5 -3 12 3271.41 317.785 5
 5 3 -12 3269.24 459.899 2
 5 -3 -12 2561.9 362.387 2
 -5 -3 11 6755.37 447.273 5
 5 3 -11 6831.83 624.306 2
 -5 -3 10 3335.51 311.106 5
 -5 -3 9 2160.03 249.479 5
 -5 3 8 268.866 94.5047 5
 -5 -3 8 287.185 88.0153 5
 -5 3 7 4893.01 386.688 5
 -5 -3 7 4878.99 366.947 5
 -5 3 6 105.947 48.188 5
 -5 -3 6 21.2416 22.13 5
 -5 3 5 951.059 158.023 5
 -5 -3 5 759.497 146.929 5
 -5 3 4 -18.7393 43.1645 5
 -5 -3 4 36.8662 35.7538 5
 5 3 -4 50.5047 22.4315 1
 -5 -3 3 33925.2 992.879 5
 5 3 -3 35452.9 690.582 1
 -5 3 3 34124.2 860.859 5
 -5 3 2 4508.87 299.819 5
 -5 -3 2 4583.31 365.628 5
 5 3 -2 4232.21 269.702 1
 -5 3 1 31836.6 759.645 5
 -5 -3 1 33369.3 987.075 5
 5 3 -1 32384.2 822.511 1
 -5 3 0 25927 655.525 5
 5 3 0 26090.8 802.631 1
 -5 -3 0 26778.2 894.621 5
 -5 -3 0 26136 975.622 4
 -5 -3 -1 9022.23 524.378 5
 -5 3 -1 8665.11 361.237 5
 -5 -3 -1 8589.59 585.624 4
 5 -3 2 31.2133 20.149 5
 -5 3 -2 13.2304 19.0651 5
 -5 -3 -2 14.2234 26.8203 5
 -5 3 -3 7782.54 305.253 5
 5 -3 3 8361.36 337.636 5
 -5 -3 -3 8874.5 530.542 5
 -5 -3 -3 7441.55 604.688 4
 5 -3 4 2310.83 169.356 5
 -5 -3 -4 2149.22 265.651 5
 -5 -3 -4 2102.08 332.46 4
 -5 -3 -5 5547.56 427.485 5
 5 -3 5 5182.96 221.91 5
 -5 -3 -5 5592.57 576.316 4
 5 3 6 4149.92 446.265 1
 -5 -3 -6 4402.06 385.377 5
 -5 -3 -6 4423.85 528.786 4
 -5 -3 -7 4675.94 395.12 5
 5 3 7 5105.92 513.721 1
 -5 3 -7 5400.95 473.481 4
 -5 -3 -7 5110.44 589.376 4
 5 3 8 2809.19 389.334 1
 -5 -3 -8 2669.41 451.89 4
 -5 -3 -8 2694.94 299.709 5
 -5 3 -8 2546.43 424.986 2
 -5 3 -8 3063.25 373.333 4
 5 3 9 18.4838 54.5566 1
 -5 -3 -9 -132.106 97.0688 4
 5 -3 9 -57.5448 90.7251 1
 -5 3 -9 20.2586 74.7226 2
 -5 3 -9 -231.361 108.723 4
 -5 3 -10 137.866 84.9495 4
 -5 -3 -10 210.276 139.183 4
 -5 3 -10 388.421 188.6 2
 5 -3 10 284.963 127.703 1
 5 3 10 441.441 170.142 1
 -5 -3 -11 2136.93 437.345 4
 5 3 11 1822.33 343.037 1
 -5 3 -11 1706.11 392.119 2
 5 -3 11 1956.07 358.424 1
 5 -3 12 804.951 233.066 1
 -5 -3 -12 1127.38 340.397 4
 5 3 12 915.149 261.519 1
 -5 3 -12 1233.81 342.82 2
 -5 -3 -13 346.407 220.052 4
 5 -3 13 103.071 101.733 1
 5 3 13 86.4719 63.8527 1
 5 -3 14 -169.521 120.788 1
 -5 -3 -14 20.7434 69.0465 4
 5 -4 -19 168.519 158.344 3
 5 4 -18 -102.153 117.903 2
 5 -4 -18 120.955 163.004 3
 5 -4 -17 85.6642 94.9993 2
 5 -4 -17 -112.471 180.522 3
 5 4 -17 -17.2337 153.188 2
 5 -4 -16 142.367 105.478 2
 5 -4 -16 139.834 132.76 3
 5 4 -16 150.934 129.272 2
 5 -4 -15 199.096 149.417 2
 5 -4 -15 39.1029 111.611 3
 5 4 -15 184.59 172.283 2
 5 -4 -14 805.398 222.332 2
 5 4 -14 664.87 241.127 2
 -5 -4 13 55.0912 46.5928 5
 5 4 -13 81.5571 108.815 2
 5 -4 -13 92.3695 94.9939 2
 5 -4 -12 345.492 112.276 2
 -5 -4 12 157.572 75.685 5
 5 4 -12 111.781 135.908 2
 5 4 -11 2803.35 414.269 2
 -5 -4 11 2333.01 270.452 5
 -5 -4 10 1916.12 238.869 5
 -5 -4 9 2024.86 243.607 5
 -5 -4 8 3204.22 312.004 5
 -5 -4 7 2042.52 251.419 5
 -5 -4 6 16362.5 712.897 5
 -5 -4 5 5120.16 406.58 5
 -5 -4 4 29031.6 979.13 5
 -5 4 4 28949.7 873.802 5
 -5 -4 3 10512.8 592.895 5
 -5 4 3 9746.53 492.036 5
 5 4 -3 11134.7 390.276 1
 -5 -4 2 39947.4 1155.78 5
 5 4 -2 38044.7 822.463 1
 -5 4 2 37178.3 915.159 5
 -5 4 1 2521.09 231.902 5
 -5 -4 1 2399.92 281.597 5
 5 4 -1 2516.94 233.6 1
 -5 -4 0 3360.08 346.148 5
 5 4 0 3309.43 291.05 1
 -5 4 0 3198.69 246.199 5
 -5 -4 0 3550.68 373.421 4
 -5 -4 -1 1615.11 262.672 4
 -5 -4 -1 1594.52 238.224 5
 -5 -4 -2 2254.93 331.468 4
 -5 -4 -2 2198.15 281.871 5
 5 -4 3 17952.5 484.333 5
 -5 -4 -3 18551.2 835.765 5
 -5 -4 -3 18034.3 978.638 4
 5 -4 4 9528.11 334.917 5
 -5 -4 -4 10953.1 645.927 5
 -5 -4 -4 8941.95 725.986 4
 5 -4 5 1354.4 110.5 5
 -5 -4 -5 1436.89 305.589 4
 -5 -4 -5 1504.05 243.967 5
 5 4 6 5856.34 534.381 1
 -5 -4 -6 5609.55 472.914 5
 -5 -4 -6 5084.48 590.453 4
 -5 -4 -7 2107.76 394.963 4
 -5 -4 -7 1979.83 282.008 5
 5 4 7 2402.88 351.347 1
 -5 4 -7 2024.89 373.196 2
 -5 -4 -8 124.498 60.685 4
 -5 4 -8 92.7253 117.174 2
 -5 -4 -8 256.859 102.288 5
 5 4 8 226.215 85.9445 1
 -5 -4 -9 122.136 78.6669 4
 5 4 9 194.171 111.52 1
 -5 4 -9 94.2109 104.777 2
 -5 4 -9 302.724 116.895 4
 5 4 10 638.72 202.704 1
 -5 -4 -10 664.723 248.175 4
 5 -4 10 481.894 185.993 1
 -5 4 -10 487.303 213.698 2
 -5 4 -11 328.579 200.61 2
 5 -4 11 -19.6924 73.8935 1
 -5 -4 -11 100.818 74.7535 4
 5 4 11 101.506 107.724 1
 -5 -4 -12 -119.168 122.245 4
 -5 4 -12 148.574 126.805 2
 5 -4 12 213.309 139.378 1
 -5 -4 -13 65.5679 104.981 4
 5 -4 13 -11.2351 53.6878 1
 -5 4 -13 43.5685 59.7243 2
 -5 -4 -14 -18.5535 75.2764 4
 5 -4 14 196.992 125.602 1
 -5 -4 -15 582.082 284.305 4
 5 -5 -19 753.499 323.681 3
 5 -5 -18 386.512 233.881 3
 5 -5 -17 824.298 310.684 3
 5 5 -17 896.697 321.482 2
 5 -5 -16 383.623 231.57 3
 5 5 -16 365.748 194.295 2
 5 -5 -15 2493.64 487.877 3
 5 -5 -15 2417.24 405.436 2
 5 5 -15 2312.57 459.531 2
 5 -5 -14 1956.48 343.904 2
 5 5 -14 2349.44 433.149 2
 -5 -5 13 1957.8 253.605 5
 5 -5 -13 1795.92 311.165 2
 5 5 -13 2178.09 408.51 2
 -5 -5 12 202.561 85.4627 5
 5 5 -12 93.8098 51.1735 2
 5 -5 -12 24.5251 57.4473 2
 -5 -5 11 3758.07 346.102 5
 5 5 -11 3906.91 495.445 2
 -5 -5 10 865.564 163.664 5
 -5 -5 9 4170.87 370.186 5
 -5 -5 8 6515.29 463.689 5
 -5 -5 7 8447.63 534.28 5
 -5 -5 6 247.56 85.1588 5
 -5 -5 5 2524.69 301.756 5
 -5 -5 4 1241.07 126.829 1
 -5 -5 4 1002.14 192.124 5
 -5 -5 3 5746.1 314.565 1
 -5 -5 3 6993.23 512.763 5
 -5 -5 2 44852 1313.72 5
 -5 -5 1 3846.16 386.711 5
 5 5 -1 3781.65 291.737 1
 -5 -5 1 3476.56 358.783 4
 -5 -5 0 642.392 160.59 4
 5 5 0 792.796 145.984 1
 -5 -5 -1 5581.49 481.677 5
 5 5 1 5575.16 408.659 1
 -5 -5 -1 5937.22 530.529 4
 -5 -5 -2 3599.69 389.51 5
 -5 -5 -2 3642.33 434.06 4
 -5 -5 -3 683.494 197.513 4
 -5 -5 -3 234.055 93.9548 5
 -5 -5 -4 362.2 162.38 4
 5 -5 4 244.605 54.6264 5
 -5 -5 -4 306.1 107.442 5
 -5 -5 -5 23.417 46.4308 4
 5 -5 5 126.374 34.5053 5
 -5 -5 -5 79.7692 51.7024 5
 -5 -5 -6 8046.7 609.069 5
 5 5 6 8470.45 641.888 1
 -5 -5 -6 7964.48 750.56 4
 -5 5 -7 1388.68 320.164 2
 -5 -5 -7 941.551 207.896 5
 5 5 7 1241.93 257.994 1
 -5 -5 -8 3769.72 429.442 5
 5 5 8 4697.59 514.335 1
 -5 5 -8 4099.21 557.36 2
 5 5 9 48.2179 81.9963 1
 -5 -5 -9 45.989 56.2512 5
 -5 5 -9 198.359 187.042 2
 -5 5 -10 386.289 203.792 2
 -5 -5 -11 1531.57 403.325 4
 5 -5 11 1697.49 339.36 1
 -5 -5 -12 13.4262 70.1487 4
 -5 5 -12 -26.2299 117.589 2
 5 -5 12 50.7289 73.7773 1
 5 -5 13 670.999 233.154 1
 -5 -5 -13 397.086 198.581 4
 -5 5 -13 938.778 332.376 2
 -5 -5 -14 -35.8576 91.9151 4
 5 -5 14 -40.0731 70.041 1
 -5 -5 -15 444.998 241.502 4
 5 -6 -18 173.084 158.325 3
 5 -6 -17 57.7371 59.7465 3
 5 6 -17 -15.1231 123.691 2
 5 -6 -16 1846.89 446.932 3
 5 6 -16 1525.67 403.608 2
 5 -6 -15 1144.16 355.777 3
 5 6 -15 168.12 135.524 2
 5 -6 -14 104.547 78.16 2
 5 6 -14 82.2161 92.4506 2
 -5 -6 13 491.434 130.161 5
 5 -6 -13 371.742 139.321 2
 5 6 -13 375.65 150.504 2
 -5 -6 12 238.043 95.1232 5
 5 6 -12 228.089 139.594 2
 5 -6 -12 501.78 150.141 2
 5 6 -11 66.149 82.178 2
 -5 -6 11 31.3496 48.8755 5
 -5 -6 10 1582.65 233.405 5
 5 6 -10 1069.78 256.665 2
 -5 -6 9 227.733 86.8239 5
 -5 -6 8 1682.12 247.651 5
 -5 -6 7 10128.1 619.912 5
 -5 -6 6 28.4757 41.1448 5
 -5 -6 6 43.4528 17.4846 1
 -5 -6 5 158.773 86.433 5
 -5 -6 5 157.168 42.9245 1
 -5 -6 4 909.973 119.885 1
 -5 -6 4 922.075 188.682 5
 -5 -6 3 1177.63 236.642 5
 -5 -6 2 25486.3 1058.35 5
 -5 -6 1 225.977 107.639 4
 -5 -6 1 45.5643 51.2551 5
 -5 -6 0 636.94 171.287 4
 -5 -6 0 708.311 184.114 5
 -5 -6 -1 520.922 169.068 4
 -5 -6 -1 472.448 148.993 5
 -5 -6 -2 10377.8 708.573 5
 -5 -6 -2 10870.4 783.55 4
 -5 -6 -3 -45.4493 80.8884 4
 -5 -6 -3 20.3953 52.17 5
 -5 -6 -4 953.192 254.275 4
 5 -6 4 1060.53 120.913 5
 -5 -6 -4 1084.71 239.444 5
 -5 -6 -5 2154.18 390.755 4
 5 -6 5 1915.81 143.854 5
 5 6 5 2145.21 313.755 1
 -5 -6 -5 1801.96 297.494 5
 -5 -6 -6 3497.81 430.39 5
 5 6 6 3652.51 424.395 1
 5 -6 6 2941.67 163.089 5
 -5 -6 -7 2379.56 357.105 5
 -5 6 -7 2721.9 452.385 2
 -5 -6 -8 1260.65 272.826 5
 -5 6 -8 931.316 265.442 2
 -5 -6 -9 3617.67 447.672 5
 -5 6 -9 2980.07 507.815 2
 -5 6 -10 2060.88 449.945 2
 -5 6 -11 -7.70875 96.6643 2
 -5 -6 -12 1015.58 352.055 4
 5 -6 12 535.648 209.417 1
 -5 6 -12 649.709 269.611 2
 -5 -6 -13 60.879 54.6143 4
 -5 6 -13 48.191 206.521 2
 5 -6 13 -170.669 120.721 1
 -5 -6 -14 800.71 306.575 4
 -5 6 -14 648.991 280.371 2
 -5 -6 -15 99.6959 124.134 4
 5 -7 -18 10.4544 72.7098 3
 5 -7 -17 1.54922 94.3066 3
 5 7 -17 9.33072 105.539 2
 5 -7 -16 502.668 253.776 3
 5 7 -16 148.316 170.615 2
 5 -7 -15 415.345 206.245 3
 5 7 -15 573.27 270.526 2
 5 -7 -14 -54.1929 97.237 3
 5 7 -14 -74.1457 72.9147 2
 5 -7 -13 478.862 152.983 2
 5 7 -13 1117.35 299.038 2
 -5 -7 12 -16.7729 40.6183 5
 5 7 -12 110.24 130.883 2
 5 -7 -12 93.6134 68.0625 2
 -5 -7 11 405.168 122.704 5
 5 -7 -11 332.185 120.273 2
 5 7 -11 305.109 178.746 2
 5 7 -10 27.4824 112.94 2
 -5 -7 10 -37.0459 55.3957 5
 -5 -7 9 495.081 138.989 5
 -5 -7 8 160.021 61.6702 5
 -5 -7 7 1266.15 95.0145 1
 -5 -7 7 1295.25 229.738 5
 -5 -7 6 413.806 135.599 5
 -5 -7 6 496.697 74.1557 1
 -5 -7 5 1352.63 250.621 5
 -5 -7 5 1207.9 135.586 1
 -5 -7 4 19064.1 941.412 5
 -5 -7 3 22388.4 1043.42 5
 -5 -7 2 4785.38 491.709 5
 -5 -7 2 5215.22 455.133 4
 -5 -7 1 5192.21 514.049 5
 -5 -7 1 5131.98 472.9 4
 -5 -7 0 2195.97 333.047 5
 -5 -7 0 2474.61 343.774 4
 -5 -7 -1 5579.43 543.113 5
 -5 -7 -1 5039.3 523.774 4
 -5 -7 -2 1830.5 323.357 4
 -5 -7 -2 1712.27 315.259 5
 -5 -7 -3 1339 291.698 4
 -5 -7 -3 1514.91 286.653 5
 -5 -7 -4 -116.021 111.857 4
 -5 -7 -4 -21.9476 47.2607 5
 -5 -7 -5 -17.904 81.3193 5
 -5 7 -6 292.224 168.766 2
 -5 -7 -6 363.832 121.404 5
 -5 7 -7 561.282 186.432 2
 -5 -7 -7 607.887 190.488 5
 -5 -7 -8 654.605 198.316 5
 -5 7 -8 869.318 282.15 2
 -5 -7 -9 880.094 236.714 5
 -5 7 -9 947.192 280.295 2
 -5 7 -10 29.117 65.8766 2
 -5 7 -11 1236.87 369.585 2
 5 -7 12 181.803 104.483 1
 -5 7 -12 215.256 186.787 2
 -5 -7 -13 -59.8046 165.215 4
 -5 7 -13 312.66 229.617 2
 5 -7 13 117.973 98.6966 1
 -5 -7 -14 -17.1668 83.88 4
 5 -8 -17 41.1843 65.8177 3
 5 -8 -16 444.111 241.339 3
 5 8 -16 707.739 287.714 2
 5 -8 -15 234.603 162.78 3
 5 8 -15 -8.07403 155.391 2
 5 -8 -14 58.7921 70.3645 3
 5 8 -14 168.788 134.003 2
 5 8 -13 49.5521 98.4959 2
 -5 -8 12 1108.88 206.336 5
 5 8 -12 908.131 267.462 2
 -5 -8 11 277.992 102.635 5
 5 8 -11 483.8 203.964 2
 5 -8 -11 328.939 110.013 2
 -5 -8 10 9201.92 620.427 5
 5 8 -10 9406.97 781.08 2
 -5 -8 9 8379.78 606.283 5
 5 8 -9 8828.7 714.925 2
 -5 -8 8 5796.03 512.213 5
 -5 -8 7 536.276 76.0832 1
 -5 -8 7 876.713 201.98 5
 -5 -8 6 -10.23 33.1575 5
 -5 -8 6 6.37287 14.7658 1
 -5 -8 5 5275.35 519.077 5
 -5 -8 4 251.52 124.917 5
 -5 -8 3 7916.6 657.358 5
 -5 -8 2 2231.57 349.709 5
 -5 -8 2 2647.67 337.528 4
 -5 -8 1 9599.46 745.879 5
 -5 -8 1 9223.13 656.73 4
 -5 -8 0 407.249 147.31 4
 -5 -8 0 246.7 104.468 5
 -5 -8 -1 -56.1514 92.3067 4
 -5 -8 -1 110.637 79.455 5
 -5 -8 -2 335.385 143.328 4
 -5 -8 -2 284.724 139.411 5
 -5 -8 -3 -440.694 177.776 4
 -5 -8 -3 -79.5157 80.7495 5
 -5 -8 -4 1471.67 322.924 4
 -5 -8 -4 1867.16 337.604 5
 -5 -8 -5 272.684 156.82 5
 -5 -8 -6 60.1234 71.8554 5
 -5 8 -6 179.05 120.288 2
 -5 8 -7 1465.11 356.596 2
 -5 -8 -7 1253.92 290.02 5
 -5 -8 -8 187.153 92.7747 5
 -5 8 -8 181.177 103.782 2
 -5 -8 -9 616.26 207.735 5
 -5 8 -9 204.54 145.059 2
 -5 8 -10 803.079 269.609 2
 -5 8 -11 -73.8591 119.938 2
 -5 8 -12 69.3786 105.128 2
 -5 -8 -13 -44.0929 103.616 4
 -5 8 -13 215.222 151.735 2
 -5 -8 -14 762.202 320.628 4
 5 -9 -16 600.067 292.881 3
 5 9 -16 365.87 222.579 2
 5 -9 -15 60.4077 117.262 3
 5 9 -15 79.3784 137.347 2
 5 -9 -14 -23.3212 82.168 3
 5 9 -14 -33.2291 116.07 2
 5 -9 -13 954.15 301.621 3
 5 9 -13 305.828 167.574 2
 -5 -9 12 114.091 83.302 5
 5 9 -12 40.2554 94.0735 2
 -5 -9 11 34.7649 38.9411 5
 5 9 -11 51.2023 80.3171 2
 -5 -9 10 2841.36 358.405 5
 5 9 -10 3058.57 455.853 2
 5 9 -9 322.603 163.973 2
 -5 -9 9 143.196 94.0854 5
 -5 -9 8 790.531 194.918 5
 -5 -9 7 2522.32 362.158 5
 -5 -9 6 211.731 111.288 5
 -5 -9 5 2534.87 371.755 5
 -5 -9 4 288.024 133.485 5
 -5 -9 3 192.961 98.7533 5
 -5 -9 2 166.308 99.2745 4
 -5 -9 2 177.435 68.6662 5
 -5 -9 1 275.041 128.338 4
 -5 -9 1 126.39 56.4125 5
 -5 -9 0 966.739 236.739 4
 -5 -9 0 447.868 180.053 5
 -5 -9 -1 421.828 163.175 4
 -5 -9 -1 632.832 197.443 5
 -5 -9 -2 424.651 193.604 4
 -5 -9 -2 306.721 166.366 5
 -5 -9 -3 11.5404 111.916 4
 -5 -9 -3 133.624 122.579 5
 -5 -9 -4 2064.12 373.708 5
 -5 -9 -4 2097.63 403.542 4
 -5 -9 -5 27.179 106.949 5
 -5 -9 -6 323.375 188.171 5
 -5 9 -7 1142.47 311.59 2
 -5 -9 -7 1179.66 300.052 5
 -5 -9 -8 978.175 268.619 5
 -5 9 -8 802.565 264.048 2
 -5 -9 -9 958.912 269.338 5
 -5 9 -9 1002.9 324.043 2
 -5 9 -10 801.269 289.065 2
 -5 9 -11 1768.68 432.101 2
 -5 9 -12 1339.91 394.417 2
 -5 9 -13 763.185 307.03 2
 5 -10 -16 390.298 235.558 3
 5 10 -16 49.5332 59.8701 2
 5 -10 -15 107.413 145.645 3
 5 10 -15 -88.5473 110.695 2
 5 -10 -14 1103.27 359.668 3
 5 10 -14 793.607 278.219 2
 5 -10 -13 1508.89 407.03 3
 5 10 -13 936.955 296.511 2
 -5 -10 12 -28.9413 57.5111 5
 5 -10 -12 123.352 180.133 3
 5 10 -12 -35.2318 135.946 2
 -5 -10 11 53.4892 28.5481 5
 5 10 -11 156.825 124.292 2
 -5 -10 10 2993.67 386.359 5
 5 10 -10 3375.91 485.324 2
 -5 -10 9 738.486 188.606 5
 5 10 -9 955.897 233.15 2
 -5 -10 8 8603.95 689.167 5
 5 10 -8 8939.77 718.801 2
 -5 -10 7 2703.44 388.626 5
 -5 -10 6 525.139 182.191 5
 -5 -10 5 974.11 250.771 5
 -5 -10 4 1270.23 285.03 5
 -5 -10 3 -8.88673 72.9428 5
 -5 -10 2 2447.34 403.73 5
 -5 -10 2 2270.42 333.884 4
 -5 -10 1 2890.66 442.811 5
 -5 -10 1 3254.34 420.338 4
 -5 -10 0 571.532 190.818 4
 -5 -10 0 723.272 233.498 5
 -5 -10 -1 160.337 104.065 4
 -5 -10 -1 107.832 82.6436 5
 -5 -10 -2 14660.2 1022.78 5
 -5 -10 -2 15069.2 1039.32 4
 -5 -10 -3 -8.72978 133.489 4
 -5 -10 -3 128.987 100.903 5
 -5 -10 -4 8951.96 823.555 5
 -5 -10 -4 8775.25 845.734 4
 -5 -10 -5 3036.29 483.524 5
 -5 -10 -6 7912.29 783.076 5
 -5 10 -7 637.668 237.867 2
 -5 -10 -7 470.891 186.748 5
 -5 10 -8 1908.53 426.052 2
 -5 -10 -8 1673.68 361.843 5
 -5 10 -9 2152.5 464.558 2
 -5 -10 -9 1944.58 402.256 5
 -5 -10 -10 531.539 213.369 5
 -5 10 -10 279.39 207.747 2
 -5 10 -11 260.004 199.237 2
 -5 10 -12 76.4837 135.224 2
 5 11 -15 43.6877 89.4031 2
 5 -11 -15 557.752 273.995 3
 5 -11 -14 2613.06 557.929 3
 5 11 -14 1802.62 433.643 2
 5 -11 -13 887.979 308.999 3
 5 11 -13 983.099 311.567 2
 5 -11 -12 156.17 147.861 3
 5 11 -12 164.567 125.702 2
 -5 -11 11 204.8 93.9715 5
 5 -11 -11 632.888 272.438 3
 5 11 -11 430.339 189.855 2
 -5 -11 10 647.155 183.844 5
 5 11 -10 1130.79 280.973 2
 -5 -11 9 1207.37 266.718 5
 5 11 -9 1389.13 310.777 2
 -5 -11 8 2105.47 361.589 5
 5 11 -8 1768.4 324.569 2
 -5 -11 7 7029.7 663.205 5
 5 11 -7 6631.51 612.364 2
 -5 -11 6 2876.73 429.46 5
 -5 -11 5 1615.95 327.564 5
 -5 -11 4 613.38 186.239 5
 -5 -11 3 1272.56 284.609 5
 -5 -11 3 1230.68 255.811 4
 -5 -11 2 -122.951 155.891 5
 -5 -11 2 160.385 96.3382 4
 -5 -11 1 5754.44 647.604 5
 -5 -11 1 5704.22 578.058 4
 -5 -11 0 1232.89 288.235 4
 -5 -11 0 1366.95 328.502 5
 -5 -11 -1 1325.5 303.78 4
 -5 -11 -1 1275.74 315.631 5
 -5 -11 -2 2026.33 406.62 5
 -5 -11 -2 2031.78 383.647 4
 -5 -11 -3 453.35 194.034 4
 -5 -11 -3 848.034 263.966 5
 -5 -11 -4 11802.8 978.889 5
 -5 -11 -4 12247 1035.16 4
 -5 -11 -5 3006.24 488.928 5
 -5 -11 -6 247.322 165.299 5
 -5 -11 -7 737.295 266.586 5
 -5 11 -8 1822.5 411.082 2
 -5 -11 -8 1333.33 336.326 5
 -5 11 -9 -266.869 168.299 2
 -5 -11 -9 -45.174 75.7097 5
 -5 11 -10 287.921 167.366 2
 -5 -11 -10 203.514 130.862 5
 -5 11 -11 110.482 146.289 2
 -5 11 -12 212.764 191.739 2
 5 12 -15 79.6049 119.643 2
 5 -12 -15 325.914 219.862 3
 5 -12 -14 -83.0611 121.796 3
 5 12 -14 182.302 136.925 2
 5 -12 -13 378.681 206.406 3
 5 12 -13 55.5839 73.6694 2
 5 -12 -12 329.209 230.149 3
 5 12 -12 83.144 80.4044 2
 5 12 -11 3905.84 579.602 2
 -5 -12 11 3872.66 471.006 5
 5 -12 -11 3781.49 617.196 3
 -5 -12 10 -50.6288 76.0808 5
 5 -12 -10 -96.3265 78.7344 3
 5 12 -10 47.0556 82.7063 2
 -5 -12 9 -272.421 135.213 5
 5 12 -9 113.417 42.9226 2
 -5 -12 8 330.591 161.335 5
 5 12 -8 222.005 130.908 2
 -5 -12 7 5465.41 616.427 5
 5 12 -7 7058.25 644.287 2
 5 12 -6 367.684 153.561 2
 -5 -12 6 464.455 187.262 5
 -5 -12 5 26.4703 107.317 5
 -5 -12 4 429.117 150.73 5
 -5 -12 3 8729.56 818.151 5
 -5 -12 3 9759.73 710.964 4
 -5 -12 2 202.726 119.512 4
 -5 -12 2 161.489 95.5142 5
 -5 -12 1 38.1272 72.8882 4
 -5 -12 1 16.5362 98.9977 5
 -5 -12 0 4371.31 608.785 5
 -5 -12 0 3837.86 510.014 4
 -5 -12 -1 898.229 253.598 4
 -5 -12 -1 836.591 272.051 5
 -5 -12 -2 673.572 225.858 4
 -5 -12 -2 464.021 182.441 5
 -5 -12 -3 100.529 72.3482 4
 -5 -12 -3 197.433 154.1 5
 -5 -12 -4 1014.08 297.863 4
 -5 -12 -4 691.48 246.354 5
 -5 -12 -5 235.37 123.572 5
 -5 -12 -6 1282.26 346.918 5
 -5 -12 -7 159.212 159.755 5
 -5 -12 -8 -129.033 121.032 5
 -5 12 -9 735.98 285.053 2
 -5 -12 -9 469.71 213.59 5
 -5 12 -10 515.304 281.27 2
 -5 -12 -10 215.356 170.008 5
 -5 12 -11 147.575 155.137 2
 5 -13 -14 1482.57 463.9 3
 5 13 -14 1302.79 374.328 2
 5 -13 -13 0.39538 86.6635 3
 5 13 -13 -50.6937 128.957 2
 5 -13 -12 57.1381 75.1981 3
 5 13 -12 256.181 149.99 2
 -5 -13 11 835.748 228.46 5
 5 -13 -11 1347.1 382.546 3
 5 13 -11 726.743 247.426 2
 -5 -13 10 431.601 169.278 5
 5 -13 -10 -54.0521 158.229 3
 5 13 -10 390.466 177.532 2
 -5 -13 9 124.54 82.844 5
 5 -13 -9 47.2261 104.553 3
 5 13 -9 115.778 113.539 2
 -5 -13 8 -25.0748 81.5772 5
 5 13 -8 -5.49098 80.7737 2
 -5 -13 7 2186.44 404.009 5
 5 13 -7 2272.34 375.379 2
 -5 -13 6 17135.8 1151.35 5
 5 13 -6 18291.8 1014.48 2
 5 13 -5 1123.07 244.572 2
 -5 -13 5 996.08 278.366 5
 -5 -13 4 14693.9 1092.97 5
 5 13 -4 14357.8 805.099 2
 -5 -13 3 225.924 141.664 5
 -5 -13 3 248.722 119.76 4
 -5 -13 2 4947.14 652.202 5
 -5 -13 2 5034.64 552.032 4
 -5 -13 1 1469.17 309.819 4
 -5 -13 1 1359.37 361.211 5
 -5 -13 0 3440.11 550.973 5
 -5 -13 0 3185.23 485.984 4
 -5 -13 -1 -1.94828 95.9722 4
 -5 -13 -1 -40.7856 98.4342 5
 -5 -13 -2 1577.8 360.829 4
 -5 -13 -2 2083.92 452.075 5
 -5 -13 -3 1428.27 359.327 4
 -5 -13 -3 1600.27 383.08 5
 -5 -13 -4 188.177 178.194 4
 -5 -13 -4 274.075 170.7 5
 -5 -13 -5 89.1672 92.8482 4
 -5 -13 -5 280.931 204.463 5
 -5 -13 -6 143.813 126.977 5
 -5 -13 -7 360.517 188.656 5
 -5 -13 -8 355.103 191.894 5
 -5 -13 -9 97.8875 80.2715 5
 -5 -13 -10 384.477 215.261 5
 5 14 -14 -26.1788 79.2358 2
 5 -14 -13 54.2974 102.004 3
 5 14 -13 158.247 141.204 2
 5 -14 -12 225.854 207.516 3
 5 14 -12 176.965 153.661 2
 5 -14 -11 950.709 324.855 3
 5 14 -11 704.579 257.191 2
 -5 -14 10 296.289 146.832 5
 5 -14 -10 343.13 204.268 3
 5 14 -10 294.921 174.381 2
 -5 -14 9 -6.24449 54.9916 5
 5 -14 -9 -282.42 174.879 3
 5 14 -9 -93.3072 103.517 2
 -5 -14 8 789.388 249.443 5
 5 -14 -8 632.513 236.858 3
 5 14 -8 885.523 253.641 2
 -5 -14 7 1080.65 291.776 5
 5 -14 -7 1600.37 366.126 3
 5 14 -7 1285.85 285.286 2
 -5 -14 6 -18.3268 107.624 5
 5 -14 -6 91.3633 136.626 3
 5 14 -6 40.9056 69.3536 2
 -5 -14 5 981.757 281.185 5
 5 14 -5 747.653 195.086 2
 -5 -14 4 767.428 251.911 5
 5 14 -4 1222.94 247.244 2
 5 14 -3 1468.14 247.328 2
 -5 -14 3 1605.62 385.958 5
 -5 -14 3 1538.23 292.541 4
 -5 -14 2 393.553 171.145 4
 -5 -14 2 504.098 204.178 5
 -5 -14 1 761.285 246.95 4
 -5 -14 1 994.411 296.582 5
 -5 -14 0 300.221 161.703 5
 -5 -14 0 603.996 209.603 4
 -5 -14 -1 2018.07 404.306 4
 -5 -14 -1 1822.48 433.827 5
 -5 -14 -2 10866 1037.61 5
 -5 -14 -2 11435.5 1012.87 4
 -5 -14 -3 1231.76 326.181 4
 -5 -14 -3 1709.8 410.986 5
 -5 -14 -4 56.3699 67.9362 4
 -5 -14 -4 -21.3265 61.2296 5
 -5 -14 -5 2828.47 547.604 4
 -5 -14 -5 2078.59 461.419 5
 -5 -14 -6 78.1827 88.2329 5
 -5 -14 -7 45.2593 91.0546 5
 -5 -14 -8 226.73 154.261 5
 -5 -14 -9 1695.39 441.362 5
 -5 -14 -10 67.5337 123.266 5
 5 15 -13 372.303 218.376 2
 5 -15 -12 188.066 157.477 3
 5 15 -12 400.05 230.21 2
 5 -15 -11 154.128 120.606 3
 5 15 -11 66.3929 69.4664 2
 -5 -15 10 53.7789 43.7531 5
 5 -15 -10 47.7954 78.6634 3
 5 15 -10 128.549 101.843 2
 -5 -15 9 395.545 179.749 5
 5 -15 -9 77.3401 56.907 3
 5 15 -9 605.518 229.451 2
 5 -15 -8 90.2587 71.8764 3
 -5 -15 8 159.787 123.037 5
 5 15 -8 135.594 124.749 2
 5 -15 -7 716.09 253.407 3
 -5 -15 7 344.873 173.322 5
 -5 -15 6 2646.81 485.304 5
 5 -15 -6 2767.12 491.124 3
 5 15 -6 2554.36 402.704 2
 5 -15 -5 -96.1357 105.292 3
 -5 -15 5 78.8388 95.4961 5
 5 15 -5 109.873 81.5187 2
 5 -15 -4 1630.9 352.792 3
 -5 -15 4 1333.18 345.138 5
 5 15 -4 1956.24 313.002 2
 5 -15 -3 299.078 132.363 3
 -5 -15 3 311.562 154.405 5
 -5 -15 3 369.046 155.804 4
 -5 -15 2 320.156 157.41 4
 5 -15 -2 367.909 151.825 3
 -5 -15 2 434.848 184.441 5
 5 -15 -1 5706.55 570.48 3
 -5 -15 1 5099.16 726.096 5
 -5 -15 1 6644.63 702.937 4
 -5 -15 0 4422.73 676.626 5
 -5 -15 0 3964.39 565.01 4
 -5 -15 -1 684.805 250.916 4
 -5 -15 -1 249.574 176.229 5
 -5 -15 -2 1761.79 403.617 4
 -5 -15 -2 1202.74 370.516 5
 -5 -15 -3 508.767 201.364 4
 -5 -15 -3 478.073 237.285 5
 -5 -15 -4 619.687 263.38 4
 -5 -15 -4 694.716 271.912 5
 5 -15 4 1052.17 287.191 5
 -5 -15 -5 -26.2938 58.4289 5
 -5 -15 -5 -88.7915 192.876 4
 -5 -15 -6 1109.42 360.495 4
 -5 -15 -6 1278.12 379.78 5
 -5 -15 -7 348.049 208.624 4
 -5 -15 -7 731.679 284.735 5
 -5 -15 -8 76.7531 97.2269 5
 -5 -15 -9 -55.0973 101.514 5
 -5 -15 -10 313.171 205.672 5
 5 16 -13 -73.7959 104.867 2
 5 16 -12 1477.31 410.816 2
 5 -16 -12 788.367 335.427 3
 5 -16 -11 -229.585 179.528 3
 5 16 -11 217.57 145.739 2
 5 -16 -10 -180.073 153.794 3
 -5 -16 10 -136.471 113.507 5
 5 16 -10 -229.672 155.195 2
 5 -16 -9 178.816 156.08 3
 -5 -16 9 -39.7836 73.1772 5
 5 16 -9 14.8828 77.9365 2
 5 -16 -8 -112.275 111.873 3
 -5 -16 8 205.852 161.462 5
 5 16 -8 73.8682 50.2702 2
 5 -16 -7 84.9128 57.8521 3
 -5 -16 7 138.012 113.681 5
 5 16 -7 -3.21336 50.044 2
 5 -16 -6 90.2937 74.7449 3
 -5 -16 6 47.6245 41.9293 5
 5 16 -6 27.0526 50.0602 2
 5 -16 -5 1.87376 65.6445 3
 -5 -16 5 -24.4683 118.854 5
 5 -16 -4 -79.9831 87.7489 3
 -5 -16 4 1.88622 97.572 5
 5 -16 -3 -33.7144 62.2653 3
 -5 -16 3 80.3607 69.7572 5
 -5 -16 2 1051.19 272.198 4
 5 -16 -2 731.296 223.704 3
 -5 -16 2 417.094 240.567 5
 -5 -16 1 24.5899 153.532 5
 -5 -16 1 416.926 194.108 4
 -5 -16 0 466.351 258.692 5
 -5 -16 0 473.4 209.845 4
 -5 -16 -1 -49.605 101.492 4
 -5 -16 -1 -120.503 128.905 5
 -5 -16 -2 -86.5667 112.403 4
 -5 -16 -2 -86.0822 122.328 5
 -5 -16 -3 22.6448 74.9064 4
 -5 -16 -3 45.6915 71.3119 5
 -5 -16 -4 639.129 257.743 4
 -5 -16 -4 1408.36 422.332 5
 -5 -16 -5 205.779 149.126 4
 -5 -16 -5 92.4358 118.063 5
 -5 -16 -6 799.769 324.996 4
 -5 -16 -6 1111.18 379.204 5
 -5 -16 -7 -35.6764 116.668 4
 -5 -16 -7 -168.086 157.406 5
 -5 -16 -8 178.416 167.615 4
 -5 -16 -8 316.526 220.902 5
 -5 -16 -9 533.816 271.314 5
 -5 -16 -10 -136.137 148.214 5
 5 17 -12 94.6369 114.285 2
 5 17 -11 669.016 282.452 2
 5 -17 -11 90.0622 73.8058 3
 5 17 -10 -32.7936 73.9636 2
 5 -17 -10 -145.775 144.692 3
 5 -17 -9 -152.103 146.08 3
 5 17 -9 193.675 129.115 2
 -5 -17 9 127.294 102.392 5
 5 -17 -8 204.595 167.024 3
 5 17 -8 170.444 143.32 2
 -5 -17 8 72.6188 95.6174 5
 5 -17 -7 171.698 171.651 3
 -5 -17 7 225.187 148.377 5
 5 -17 -6 78.1204 82.7707 3
 -5 -17 6 224.04 157.11 5
 5 -17 -5 187.291 117.005 3
 -5 -17 5 273.939 163.519 5
 5 -17 -4 399.189 184.241 3
 -5 -17 4 -50.6982 116.188 5
 5 -17 -3 332.932 173.393 3
 -5 -17 3 243.657 162.784 5
 -5 -17 2 -70.9916 129.369 5
 -5 -17 1 332.409 175.07 4
 -5 -17 1 215.718 161.013 5
 -5 -17 0 215.861 149.971 4
 -5 -17 0 67.4097 87.7468 5
 -5 -17 -1 176.388 152.314 4
 -5 -17 -1 155.931 154.24 5
 -5 -17 -2 141.26 127.82 4
 -5 -17 -2 298.289 151.311 5
 -5 -17 -3 201.51 144.891 4
 -5 -17 -3 361.317 223.543 5
 5 -17 3 284.027 165.562 5
 -5 -17 -4 -91.2766 163.662 4
 -5 -17 -4 13.1088 112.441 5
 -5 -17 -5 757.916 314.843 4
 -5 -17 -5 1815.81 482.727 5
 -5 -17 -6 1116.97 407.187 4
 -5 -17 -6 97.994 159.976 5
 -5 -17 -7 3158.09 662.173 4
 -5 -17 -7 2797.6 618.348 5
 -5 -17 -8 184.466 179.027 5
 -5 -17 -9 -29.0261 95.8042 5
 5 18 -11 109.134 147.595 2
 5 -18 -10 448.806 239.051 3
 5 -18 -9 -24.4288 83.2588 3
 -5 -18 9 -193.582 144.658 5
 5 -18 -8 839.068 330.392 3
 -5 -18 8 963.543 319.524 5
 5 -18 -7 405.738 225.11 3
 -5 -18 7 212.454 149.93 5
 5 -18 -6 77.6831 105.923 3
 -5 -18 6 54.854 88.4794 5
 5 -18 -5 169.87 135.223 3
 -5 -18 5 -303.91 193.959 5
 5 -18 -4 3154.03 536.632 3
 -5 -18 4 2919.64 582.094 5
 -5 -18 3 379.739 251.354 5
 -5 -18 2 191.45 125.206 5
 -5 -18 1 146.69 79.8507 5
 -5 -18 0 888.968 295.656 4
 -5 -18 0 353.202 231.536 5
 -5 -18 -1 81.7071 149.297 5
 -5 -18 -1 271.877 178.824 4
 -5 -18 -2 160.553 152.973 4
 -5 -18 -2 293.164 214.029 5
 5 -18 2 -90.2656 109.05 5
 -5 -18 -3 118.509 130.652 4
 -5 -18 -3 -132.656 148.881 5
 5 -18 3 -18.1675 62.475 5
 -5 -18 -4 550.585 261.337 4
 -5 -18 -4 139.15 128.639 5
 -5 -18 -5 -217.662 175.405 4
 -5 -18 -5 1.73499 73.8355 5
 -5 -18 -6 -11.5135 71.7388 4
 -5 -18 -6 201.551 208.337 5
 5 -19 -9 303.56 226.605 3
 -5 -19 9 -39.4025 84.0167 5
 5 -19 -8 356.721 209.623 3
 -5 -19 8 395.474 213.514 5
 -5 -19 7 -98.0191 111.861 5
 5 -19 -7 -42.7784 84.9859 3
 5 -19 -6 -87.6581 109.798 3
 -5 -19 6 80.6481 78.3422 5
 5 -19 -5 -16.0359 73.4245 3
 -5 -19 5 -91.4181 125.949 5
 -5 -19 4 589.309 301.776 5
 -5 -19 3 303.086 173.812 5
 -5 -19 2 -93.4783 203.581 5
 -5 -19 1 971.198 364.68 5
 -5 -19 0 318.586 221.959 5
 -5 -19 -1 345.565 203.405 4
 -5 -19 -1 538.939 274.325 5
 5 -19 1 407.389 213.074 5
 -5 -19 -2 -47.3597 89.1256 4
 -5 -19 -2 73.2041 126.398 5
 5 -19 2 34.0487 80.1795 5
 -5 -19 -3 272.897 178.539 4
 -5 -19 -3 -4.91545 164.275 5
 -5 -19 -4 243.418 153.036 4
 -5 -19 -4 -477.156 268.308 5
 -5 -19 -5 77.1697 127.914 4
 5 -20 -8 -0.42824 179.094 3
 -5 -20 8 79.7956 80.9565 5
 5 -20 -7 1060.28 370.599 3
 -5 -20 7 769.798 312.032 5
 5 -20 -6 -0.37691 105.579 3
 -5 -20 6 135.416 143.083 5
 -5 -20 5 -342.116 214.148 5
 -5 -20 4 260.08 178.242 5
 -5 -20 3 245.833 178.062 5
 -5 -20 2 -283.432 203.117 5
 -5 -20 1 -479.826 267.884 5
 -5 -20 0 102.934 111.353 5
 5 -20 0 604.792 275.313 5
 5 -20 1 -161.879 154.777 5
 -5 -20 -2 180.104 168.457 4
 5 -20 2 581.987 272.546 5
 -5 -20 -3 282.82 193.959 4
 -5 -20 -4 34.5139 90.2928 4
 5 -21 -1 1538.62 474.524 5
 5 -21 0 -279.851 205.012 5
 5 -21 1 164.977 184.906 5
 6 0 -19 -259.679 176.73 2
 6 0 -18 83.8578 120.914 2
 6 0 -17 -56.1794 79.7639 3
 6 0 -17 96.1873 125.441 2
 6 0 -16 236.546 133.092 2
 6 0 -15 -47.9996 60.5815 2
 6 0 -14 1110.36 290.177 2
 -6 0 13 -14.0808 46.6387 5
 6 0 -13 -71.2154 69.0636 2
 -6 0 12 1719.66 254.601 5
 -6 0 11 9.98748 35.5705 5
 -6 0 10 -31.6 54.2434 5
 -6 0 9 3.85259 28.7765 5
 -6 0 8 2925.61 293.662 5
 -6 0 7 -18.41 39.0902 5
 -6 0 6 34568.9 956.339 5
 -6 0 5 -20.9182 47.8793 5
 -6 0 4 3265.29 283.127 5
 -6 0 3 48.4844 47.1005 5
 -6 0 2 12200.1 520.63 5
 -6 0 1 0.46152 20.9737 5
 -6 0 0 1405.91 176.785 5
 -6 0 -1 -19.0834 29.8295 5
 -6 0 -2 20354.4 632.241 5
 -6 0 -3 31.688 37.876 5
 -6 0 -3 67.0913 77.5733 4
 -6 0 -4 4614.48 287.134 5
 -6 0 -4 4167.3 442.587 4
 -6 0 -5 17.7507 36.0046 4
 -6 0 -5 8.89847 22.9692 5
 6 0 6 8794.9 673.314 1
 -6 0 -6 9111.08 364.852 5
 -6 0 -6 8894.58 697.895 4
 -6 0 -7 39.9714 66.39 4
 6 0 7 -76.7248 110.352 1
 -6 0 -8 1105.5 257.63 4
 6 0 8 365.002 155.644 1
 6 0 9 50.1518 47.8708 1
 -6 0 -9 -14.44 61.3623 4
 -6 0 -10 2109.65 394.818 4
 6 0 10 2682.31 426.057 1
 -6 0 -11 42.2365 65.7329 4
 6 0 11 -37.769 88.276 1
 -6 0 -12 60.3195 50.0725 4
 6 0 12 102.249 91.0982 1
 6 0 13 -57.9889 92.8039 1
 6 0 14 546.762 219.066 1
 6 0 15 90.0646 112.546 1
 6 -1 -19 111.895 118.187 2
 6 1 -19 -90.0744 111.338 2
 6 -1 -18 78.7736 100.396 2
 6 1 -18 26.4741 80.5673 2
 6 -1 -17 620.493 231.195 3
 6 -1 -17 508.65 212.525 2
 6 1 -17 724.459 269.527 2
 6 -1 -16 47.4417 59.3644 2
 6 1 -16 118.234 106.602 2
 6 -1 -15 307.855 176.745 2
 6 1 -15 -52.4216 98.2356 2
 -6 -1 14 763.776 176.17 5
 6 1 -14 794.549 228.777 2
 6 -1 -14 454.689 170.988 2
 -6 -1 13 8527.83 580.998 5
 6 1 -13 9961.93 797.476 2
 6 -1 -13 8948.26 739.258 2
 -6 1 12 4013.72 406.408 5
 -6 -1 12 4046.54 384.49 5
 -6 1 11 996.874 190.763 5
 -6 -1 11 871 171.998 5
 -6 1 10 263.433 89.6508 5
 -6 -1 10 231.836 78.6115 5
 6 1 -10 346.895 62.7219 1
 -6 -1 9 3237.37 314.234 5
 -6 1 9 2736.51 299.641 5
 6 1 -9 2619.2 155.031 1
 -6 -1 8 801.739 152.769 5
 -6 1 8 563.866 136.634 5
 -6 -1 7 829.375 154.444 5
 -6 1 7 890.425 159.229 5
 -6 1 6 3095.16 289.195 5
 -6 -1 6 2861.31 280.614 5
 -6 1 5 13247.1 575.409 5
 -6 -1 5 12828.4 582.948 5
 -6 1 4 47047.7 1051.27 5
 -6 -1 4 45812.3 1085.85 5
 -6 1 3 284.032 83.2519 5
 -6 -1 3 494.048 118.415 5
 -6 1 2 4821.9 321.949 5
 -6 -1 2 5312.83 365.547 5
 -6 1 1 162.045 54.6081 5
 -6 -1 1 153.484 60.383 5
 -6 1 0 7525.92 377.372 5
 -6 -1 0 7350.15 423.226 5
 -6 1 -1 18169.6 568.911 5
 -6 -1 -1 18118.2 660.07 5
 -6 1 -2 2970.59 224.314 5
 -6 -1 -2 2823.26 259.886 5
 -6 -1 -2 3341.18 374.466 4
 -6 1 -3 2.80909 13.3465 5
 -6 -1 -3 22.3914 30.0076 5
 -6 -1 -4 2032.06 320.125 4
 -6 1 -4 1825.36 161.123 5
 -6 -1 -4 1793.94 200.414 5
 6 -1 4 1623.41 188.944 5
 -6 -1 -5 2312.2 356.616 4
 -6 1 -5 2720.05 180.406 5
 -6 -1 -5 2627.47 242.806 5
 6 -1 5 2693.06 231.076 5
 -6 1 -5 2559.74 352.901 4
 -6 1 -6 251.393 124.656 4
 -6 -1 -6 190.746 126.797 4
 -6 1 -6 144.975 38.2575 5
 -6 -1 -6 133.716 55.2029 5
 6 1 6 76.9912 73.8888 1
 6 -1 7 4403.9 491.009 1
 6 1 7 3859.47 454.403 1
 -6 -1 -7 4172.46 280.328 5
 -6 1 -7 3635.52 450.641 4
 -6 -1 -7 4199.94 520.166 4
 6 1 8 244.864 119.877 1
 -6 -1 -8 549.591 211.857 4
 -6 1 -8 375.744 155.915 4
 6 -1 8 361.301 136.074 1
 6 -1 9 6816.5 660.805 1
 6 1 9 6160.1 630.798 1
 -6 1 -9 6077.6 625.678 4
 -6 -1 -9 6185.49 680.483 4
 -6 -1 -10 615.7 231.506 4
 -6 1 -10 340.305 136.062 4
 6 -1 10 412.721 163.851 1
 6 1 10 742.06 231.133 1
 6 -1 11 1711.74 360.138 1
 -6 -1 -11 1910.98 398.528 4
 -6 1 -11 2225.63 402.002 4
 6 1 11 2398.75 413.954 1
 6 1 12 29.0837 47.4132 1
 -6 -1 -12 112.175 77.8149 4
 6 -1 12 -30.6663 55.1528 1
 6 1 13 613.681 218.005 1
 6 -1 13 479.26 203.968 1
 6 1 14 639.008 249.728 1
 6 -1 14 538.899 226.957 1
 6 1 15 22.3377 64.4232 1
 6 -1 15 -76.9687 90.4845 1
 6 -2 -19 101.402 132.372 2
 6 -2 -18 76.1305 72.4938 2
 6 -2 -18 -131.189 121.449 3
 6 2 -18 -12.0466 100.189 2
 6 -2 -17 105.132 84.6279 3
 6 -2 -17 12.3626 52.0406 2
 6 2 -17 181.106 175.805 2
 6 -2 -16 -58.1953 65.4532 2
 6 2 -16 123.627 100.63 2
 6 -2 -15 1853.26 365.967 2
 6 2 -15 1944.55 400.644 2
 6 2 -14 34.675 99.7553 2
 6 -2 -14 67.7899 118.152 2
 6 2 -13 640.49 206.181 2
 -6 -2 13 863.794 180.608 5
 6 -2 -13 525.38 167.52 2
 -6 -2 12 5704.36 446.83 5
 -6 2 11 1499.69 249.646 5
 -6 -2 11 1640.89 233.002 5
 -6 2 10 6587.79 498.134 5
 -6 -2 10 7197.24 479.831 5
 -6 -2 9 191.962 74.7775 5
 -6 2 9 295.243 101.423 5
 -6 2 8 6497.56 454.79 5
 -6 -2 8 6394.69 434.801 5
 -6 -2 7 1390.83 200.054 5
 -6 2 7 1115.18 181.369 5
 -6 -2 6 64.8354 48.5538 5
 -6 2 6 69.174 43.3048 5
 -6 -2 5 3198.04 300.516 5
 -6 2 5 2784.99 272.044 5
 -6 2 4 11684.7 533.477 5
 -6 -2 4 12250.6 594.763 5
 -6 -2 3 8600.33 500.496 5
 -6 2 3 8594.85 442.538 5
 -6 -2 2 88.7666 54.8338 5
 -6 2 2 170.737 69.2698 5
 -6 -2 1 4327.17 354.283 5
 -6 2 1 4537.52 296.535 5
 -6 2 0 126.279 45.4117 5
 -6 -2 0 243.071 83.0831 5
 -6 2 -1 1022.69 131.384 5
 -6 -2 -1 1249.23 192.739 5
 -6 2 -2 8695.69 369.573 5
 -6 -2 -2 8737.41 504.426 5
 -6 -2 -2 9554.31 660.474 4
 -6 -2 -3 9709.86 525.95 5
 -6 2 -3 9329.7 360.184 5
 -6 -2 -3 10118.5 715.305 4
 -6 -2 -4 1304.55 272.799 4
 -6 2 -4 1130.21 117.796 5
 6 -2 4 1190.11 150.85 5
 -6 -2 -4 1193.57 181.974 5
 -6 -2 -5 1056.19 252.437 4
 -6 2 -5 790.609 88.1264 5
 -6 -2 -5 682.546 141.24 5
 6 -2 5 629.031 103.107 5
 -6 -2 -6 5698.14 397.464 5
 6 2 6 5793.54 541.531 1
 -6 2 -6 5767.42 200.561 5
 -6 2 -6 5722.14 524.219 4
 -6 -2 -6 6188.75 631.945 4
 -6 -2 -7 2509.85 413.542 4
 -6 -2 -7 2595.24 264.723 5
 6 2 7 2377.47 365.263 1
 -6 2 -7 2518.43 361.898 4
 6 -2 8 3505.33 454.786 1
 -6 -2 -8 2979.54 471.284 4
 6 2 8 3153.14 436.663 1
 -6 2 -8 3600.23 445.08 4
 -6 2 -9 371.358 168.075 4
 -6 -2 -9 246.971 123.02 4
 6 -2 9 68.3181 52.6961 1
 6 2 9 174.354 84.0688 1
 -6 -2 -10 66.765 104.089 4
 -6 2 -10 196.3 113.854 4
 6 2 10 134.389 105.502 1
 6 -2 10 23.8165 61.3717 1
 6 -2 11 281.541 157.179 1
 -6 -2 -11 585.041 207.99 4
 6 2 11 510.805 187.366 1
 6 -2 12 111.779 100.841 1
 6 2 12 -36.2117 69.3222 1
 -6 -2 -13 -3.19479 117.643 4
 6 2 13 0.99525 71.5006 1
 6 -2 13 -70.5488 82.6604 1
 6 2 14 559.433 219.458 1
 6 -2 14 186.62 131.208 1
 6 -2 15 541.575 245.135 1
 6 -3 -19 204.142 162.399 3
 6 -3 -18 415.458 193.697 2
 6 -3 -18 322.332 191.567 3
 6 3 -18 655.912 281.11 2
 6 -3 -17 82.544 118.438 3
 6 -3 -17 -138.667 118.083 2
 6 3 -17 150.325 153.716 2
 6 -3 -16 -121.914 104.711 2
 6 3 -16 64.7867 84.333 2
 6 -3 -15 1127.59 272.759 2
 6 3 -15 607.558 224.838 2
 -6 -3 14 -63.5969 60.8162 5
 6 3 -14 15.1625 59.424 2
 6 -3 -14 -18.3843 48.8304 2
 6 -3 -13 282.665 132.158 2
 -6 -3 13 424.281 124.67 5
 6 3 -13 510.302 198.567 2
 -6 -3 12 277.422 105.628 5
 -6 -3 11 5.65259 39.8383 5
 -6 -3 10 225.768 79.3696 5
 -6 -3 9 3302.64 324.997 5
 -6 3 9 3203.11 346.859 5
 -6 3 8 2773.38 314.893 5
 -6 -3 8 2813.1 302.131 5
 -6 -3 7 1926.38 243.784 5
 -6 3 7 1593.24 225.535 5
 -6 3 6 16241.6 699.477 5
 -6 -3 6 16946 731.666 5
 6 3 -6 15753.7 276.01 1
 -6 -3 5 17824.1 751.906 5
 -6 3 5 17218.1 696.943 5
 6 3 -5 17581.5 423.288 1
 -6 3 4 753.22 136.081 5
 -6 -3 4 693.377 147.027 5
 6 3 -4 641.85 95.4563 1
 -6 3 3 27739 818.44 5
 -6 -3 3 28853.7 971.323 5
 6 3 -3 28603.6 724.889 1
 -6 3 2 3557.6 280.745 5
 -6 -3 2 3953.76 367.183 5
 6 3 -2 3597.12 282.452 1
 -6 3 1 2995.93 247.65 5
 -6 -3 1 3564.23 344.743 5
 6 3 -1 2880.13 269.717 1
 -6 3 0 17412.9 574.06 5
 -6 -3 0 17793 771.855 5
 6 3 0 17238.2 718.47 1
 -6 -3 -1 32468 1042.07 5
 -6 3 -1 32012.5 750.266 5
 -6 -3 -1 33096.8 1227.16 4
 -6 -3 -2 476.443 162.871 4
 -6 3 -2 517.032 94.0398 5
 -6 -3 -2 604.869 141.083 5
 -6 -3 -3 476.255 161.983 4
 -6 3 -3 343.873 71.9104 5
 -6 -3 -3 328.627 122.856 5
 -6 3 -4 152.522 40.3519 5
 -6 -3 -4 319.008 141.501 4
 6 -3 4 118.563 45.4966 5
 -6 -3 -4 157.748 78.3531 5
 -6 -3 -5 3263.5 446.204 4
 -6 -3 -5 2345.06 281.68 5
 6 -3 5 2504.9 189.468 5
 -6 -3 -6 130.077 122.829 4
 6 3 6 55.1619 85.3367 1
 -6 -3 -6 13.8217 25.5094 5
 -6 -3 -7 6001.35 448.903 5
 6 3 7 5054.33 534.049 1
 -6 -3 -7 5599.21 636.261 4
 6 3 8 42.9768 71.5181 1
 -6 -3 -8 65.9621 74.7151 4
 -6 -3 -9 48.4032 57.7935 4
 6 3 9 51.7889 54.1254 1
 6 -3 9 146.435 113.001 1
 -6 3 -9 194.073 115.586 4
 -6 -3 -10 -18.124 54.5438 4
 6 3 10 3.55598 41.3267 1
 6 -3 10 -36.2076 74.5141 1
 6 3 11 102.444 89.5573 1
 6 -3 11 16.7614 47.4772 1
 -6 -3 -12 1035.14 327.984 4
 6 -3 12 604.14 218.267 1
 6 3 12 496.656 205.437 1
 -6 -3 -13 -51.7391 125.554 4
 6 -3 13 172.625 126.95 1
 6 3 13 46.2352 92.1024 1
 -6 -3 -14 34.3887 131.642 4
 6 -3 14 15.8075 58.7438 1
 6 -4 -19 209.706 164.367 3
 6 -4 -18 846.638 317.073 3
 6 4 -18 510.191 264.372 2
 6 -4 -17 97.0364 88.9084 3
 6 -4 -17 215.274 145.669 2
 6 4 -17 428.142 227.654 2
 6 -4 -16 4.08384 64.4847 2
 6 4 -16 -213.873 151.894 2
 6 -4 -15 896.577 254.703 2
 6 4 -15 590.561 240.679 2
 -6 -4 14 950.303 189.781 5
 6 4 -14 973.565 308.657 2
 6 -4 -14 902.652 247.907 2
 6 -4 -13 360.404 132.412 2
 6 4 -13 531.586 202.571 2
 -6 -4 13 513.842 137.603 5
 6 4 -12 2864.1 438.772 2
 -6 -4 12 2742.4 311.905 5
 -6 -4 11 1875.71 252.126 5
 -6 -4 10 52.6129 50.8359 5
 -6 -4 9 -1.44074 36.3885 5
 -6 -4 8 1079.22 193.357 5
 -6 4 7 3761.6 363.688 5
 -6 -4 7 4911.23 409.569 5
 -6 4 6 251.956 91.8433 5
 -6 -4 6 605.292 161.375 5
 -6 -4 5 18601.6 812.179 5
 -6 4 5 17933.8 752.044 5
 -6 4 4 22.3086 49.6908 5
 6 4 -4 16.1705 15.3763 1
 -6 -4 4 -26.1257 70.472 5
 -6 -4 3 4980.2 432.786 5
 -6 4 3 4539.97 349.148 5
 6 4 -3 5213.8 312.385 1
 -6 4 2 201.484 83.2726 5
 -6 -4 2 177.355 93.888 5
 6 4 -2 207.683 75.2125 1
 -6 -4 1 11793.1 661.541 5
 6 4 -1 11055.9 539.643 1
 -6 4 1 11061.1 507.928 5
 -6 4 0 3379.08 270.798 5
 -6 -4 0 3524.23 367.439 5
 6 4 0 3097.73 306.672 1
 -6 -4 0 3049.34 364.809 4
 -6 -4 -1 297.08 116.572 4
 -6 4 -1 337.963 82.3859 5
 -6 -4 -1 161.034 78.7493 5
 -6 -4 -2 96.055 48.6079 4
 -6 -4 -2 93.1531 48.7046 5
 -6 4 -2 66.3277 31.9764 5
 -6 -4 -3 4061.77 402.979 5
 -6 -4 -3 4032.93 486.359 4
 -6 -4 -4 672.937 195.749 4
 6 -4 4 642.674 101.876 5
 -6 -4 -4 554.808 151.233 5
 6 -4 5 9138.5 351.893 5
 -6 -4 -5 9593.06 624.915 5
 6 4 5 11591.2 751.486 1
 -6 -4 -5 10900.1 856.751 4
 -6 -4 -6 908.718 263.362 4
 6 4 6 950.98 223.1 1
 -6 -4 -6 742.532 178.335 5
 6 4 7 193.634 102.591 1
 -6 -4 -7 127.443 88.2647 4
 -6 -4 -7 129.81 73.5185 5
 -6 -4 -8 -75.4263 140.824 4
 6 4 8 85.8923 88.7684 1
 -6 -4 -8 117.041 70.547 5
 6 4 9 7386.76 688.945 1
 -6 -4 -9 7101 790.349 4
 -6 -4 -10 296.005 144.936 4
 6 4 10 727.619 228.116 1
 6 -4 10 350.026 168.734 1
 -6 -4 -11 4586.01 673.905 4
 6 4 11 3284.66 484.486 1
 6 -4 11 3205.22 480.577 1
 6 4 12 -59.4669 75.7197 1
 6 -4 12 -232.612 137.583 1
 6 -4 13 347.925 156.076 1
 -6 -4 -13 427.377 219.933 4
 -6 -4 -14 512.392 259.757 4
 6 -4 14 343.367 191.748 1
 6 -5 -19 86.6986 137.201 3
 6 -5 -18 529.464 255.83 3
 6 -5 -17 361.604 204.959 3
 6 5 -17 470.381 229.44 2
 6 -5 -16 724.763 270.763 3
 6 -5 -16 779.679 237.482 2
 6 5 -16 393.571 223.067 2
 6 -5 -15 105.801 54.1467 2
 6 5 -15 119.15 103.745 2
 -6 -5 14 34.0957 51.4713 5
 6 5 -14 96.7184 95.2932 2
 6 -5 -14 126.684 82.5266 2
 6 -5 -13 3.76078 47.9805 2
 -6 -5 13 -22.212 61.5361 5
 6 5 -13 -40.1399 71.9771 2
 -6 -5 12 24.3992 38.8977 5
 6 5 -12 128.465 115.771 2
 -6 -5 11 264.515 98.6332 5
 -6 -5 10 6355.29 478.375 5
 -6 -5 9 5470.86 445.1 5
 -6 -5 8 62.1458 56.2235 5
 -6 -5 7 7803.03 544.567 5
 -6 -5 6 71.5473 51.8855 5
 -6 -5 5 6226.32 501.408 5
 -6 -5 4 18169.2 866.195 5
 -6 -5 3 13824.8 754.616 5
 6 5 -3 13050.2 500.681 1
 -6 -5 2 8335.08 594.893 5
 6 5 -2 8179.27 430.663 1
 -6 -5 1 28354.4 1099.01 5
 6 5 -1 28185.1 866.348 1
 -6 -5 0 13052.7 754.376 5
 -6 -5 0 13025.5 788.825 4
 -6 -5 -1 209.282 117.517 4
 -6 -5 -1 141.887 102.42 5
 -6 -5 -2 596.759 173.971 4
 -6 -5 -2 596.261 172.132 5
 -6 -5 -3 7272.52 578.295 5
 -6 -5 -3 5758.37 602.439 4
 -6 -5 -4 325.158 139.429 4
 -6 -5 -4 197.386 102.293 5
 -6 -5 -5 3325.76 391.539 5
 6 5 5 2765.93 368.957 1
 -6 -5 -5 3074.53 468.269 4
 -6 -5 -6 307.982 140.529 4
 -6 -5 -6 323.593 134.537 5
 6 5 6 239.607 89.1428 1
 -6 -5 -7 534.619 217.16 4
 6 5 7 346.725 152.138 1
 -6 -5 -7 352.981 119.622 5
 -6 -5 -8 6197.85 544.323 5
 6 5 8 5943.94 603.857 1
 -6 -5 -8 6415.02 748.359 4
 6 5 9 -99.502 114.379 1
 -6 -5 -9 77.5069 217.163 4
 -6 -5 -10 -162.6 164.628 4
 6 5 10 426.406 190.297 1
 -6 -5 -11 119.127 98.6388 4
 6 -5 11 -80.8067 76.3924 1
 -6 -5 -12 302.967 200.225 4
 6 -5 12 738.184 251.254 1
 6 -5 13 234.062 141.01 1
 -6 -5 -13 -83.8006 109.685 4
 6 -5 14 -61.4277 81.4055 1
 -6 -5 -14 432.899 240.765 4
 6 -6 -18 -29.8855 73.3021 3
 6 -6 -17 100.65 117.349 3
 6 6 -17 -56.3529 96.6098 2
 6 -6 -16 319.882 202.018 3
 6 6 -16 24.7875 85.1624 2
 6 6 -15 1363.15 343.285 2
 6 6 -14 269.146 183.802 2
 6 -6 -14 397.96 148.095 2
 6 -6 -13 227.816 111.609 2
 -6 -6 13 50.4848 42.1192 5
 6 6 -13 60.2219 72.2171 2
 -6 -6 12 1837.73 269.37 5
 6 6 -12 1469.43 313.431 2
 -6 -6 11 2.68466 35.4597 5
 -6 -6 10 18550.3 848.491 5
 -6 -6 9 2314.84 308.762 5
 -6 -6 8 246.106 111.005 5
 -6 -6 7 1011.36 211.792 5
 -6 -6 6 784.587 193.089 5
 -6 -6 5 10320.7 670.944 5
 -6 -6 4 14259.7 803.5 5
 -6 -6 3 15611.5 856.222 5
 -6 -6 2 5308.55 511.136 5
 -6 -6 1 37.8627 58.2559 5
 6 6 -1 20.1447 26.4862 1
 -6 -6 1 -1.98764 45.2398 4
 -6 -6 0 198.562 118.564 4
 -6 -6 0 271.14 115.546 5
 -6 -6 -1 2569.19 376.266 4
 -6 -6 -1 2526.63 349.842 5
 -6 -6 -2 1146.37 273.588 4
 -6 -6 -2 1247.57 250.616 5
 6 6 2 1196.53 214.747 1
 -6 -6 -3 3332.04 468.847 4
 -6 -6 -3 3559.07 425.095 5
 6 6 3 3564.04 391.174 1
 -6 -6 -4 5247.6 523.635 5
 6 6 4 4961.28 481.992 1
 -6 -6 -4 4704.09 579.619 4
 -6 -6 -5 757.671 228.71 4
 -6 -6 -5 750.446 193.282 5
 6 6 5 1295.51 259.765 1
 -6 -6 -6 249.598 174.178 4
 6 6 6 343.003 121.997 1
 -6 -6 -6 213.666 114.363 5
 -6 -6 -7 7993.74 657.467 5
 6 6 7 7719.91 669.577 1
 -6 -6 -7 8330.53 855.853 4
 -6 -6 -8 2291.82 463.418 4
 -6 -6 -8 2649.47 377.789 5
 6 6 8 2877.88 430.698 1
 -6 -6 -9 225.964 158.474 4
 -6 -6 -10 -138.886 161.36 4
 -6 -6 -11 614.05 253.015 4
 6 -6 11 817.067 255.359 1
 -6 -6 -12 308.809 178.782 4
 6 -6 12 289.932 145.78 1
 -6 -6 -13 622.455 277.461 4
 6 -6 13 816.328 264.632 1
 -6 -6 -14 2.90731 51.0872 4
 6 -7 -18 10.3356 59.2659 3
 6 -7 -17 -207.536 166.944 3
 6 7 -17 -227.507 176.306 2
 6 -7 -16 210.915 165.934 3
 6 7 -16 279.632 186.906 2
 6 7 -15 140.912 139.071 2
 6 7 -14 1188.73 331.883 2
 -6 -7 13 48.7054 49.0684 5
 6 7 -13 120.341 111.03 2
 6 -7 -13 96.1686 69.364 2
 6 7 -12 1731.44 364.887 2
 -6 -7 12 1708.13 267.202 5
 6 7 -11 488.633 207.504 2
 -6 -7 11 251.009 102.425 5
 -6 -7 10 9924.54 649.636 5
 -6 -7 9 8.42716 41.6767 5
 -6 -7 8 3845.39 409.763 5
 -6 -7 7 277.167 111.345 5
 -6 -7 6 3085.55 390.717 5
 -6 -7 5 1549 161.99 1
 -6 -7 5 1911.58 304.494 5
 -6 -7 4 3829.08 433.394 5
 -6 -7 3 170.58 99.2017 5
 -6 -7 2 1521.73 279.407 5
 -6 -7 1 11206.2 785.27 5
 -6 -7 1 10929.8 735.955 4
 -6 -7 0 3853.88 457.717 5
 -6 -7 0 3863.02 457.343 4
 -6 -7 -1 1227.18 266.269 4
 -6 -7 -1 983.227 229.978 5
 -6 -7 -2 2389.21 392.921 4
 -6 -7 -2 2406.3 374.493 5
 -6 -7 -3 39.781 74.1187 4
 -6 -7 -3 136.521 106.353 5
 -6 -7 -4 3916.13 476.615 5
 -6 -7 -4 4684.92 589.624 4
 -6 -7 -5 1921.28 336.309 5
 -6 -7 -5 2089.11 430.305 4
 -6 -7 -6 1192.18 326.678 4
 -6 -7 -6 1115.01 246.758 5
 -6 -7 -7 4198.22 617.818 4
 -6 -7 -7 3282.02 448.547 5
 -6 -7 -8 1615.38 394.773 4
 -6 -7 -8 1955.96 347.845 5
 -6 -7 -9 8.66014 117.883 4
 -6 -7 -10 192.228 155.916 4
 -6 -7 -11 -26.9614 119.037 4
 -6 -7 -12 1549.13 435.812 4
 6 -7 12 996.568 287.04 1
 -6 -7 -13 49.7549 131.81 4
 6 -7 13 130.676 138.614 1
 -6 -7 -14 -204.18 182.029 4
 6 -8 -17 -218.903 172.518 3
 6 -8 -16 643.224 272.742 3
 6 8 -16 465.117 248.833 2
 6 -8 -15 1195.97 357.452 3
 6 8 -15 1197.33 363.501 2
 6 8 -14 422.351 190.572 2
 -6 -8 13 -27.9034 41.9588 5
 6 8 -13 230.718 153.845 2
 -6 -8 12 126.474 71.1771 5
 6 8 -12 328.402 180.935 2
 -6 -8 11 4014.34 424.984 5
 6 8 -11 3785.91 514.259 2
 -6 -8 10 16.788 61.6108 5
 -6 -8 9 5103.18 494.663 5
 -6 -8 8 290.679 141.23 5
 -6 -8 7 6196.4 264.769 1
 -6 -8 7 7273.47 615.061 5
 -6 -8 6 404.379 137.148 5
 -6 -8 6 313.551 70.7966 1
 -6 -8 5 1226.92 252.416 5
 -6 -8 4 -15.916 53.7436 5
 -6 -8 3 9109.28 724.248 5
 -6 -8 2 -20.4239 114.379 5
 -6 -8 2 180.876 128.613 4
 -6 -8 1 11045 803.827 5
 -6 -8 1 10760.2 753.225 4
 -6 -8 0 4283.97 507.432 5
 -6 -8 0 3879.21 469.099 4
 -6 -8 -1 404.174 145.025 4
 -6 -8 -1 199.519 92.0463 5
 -6 -8 -2 114.674 75.4043 4
 -6 -8 -2 33.3703 67.2632 5
 -6 -8 -3 1201.27 294.413 4
 -6 -8 -3 872.57 229.785 5
 -6 -8 -4 219.516 108.683 4
 -6 -8 -4 76.6895 81.9966 5
 -6 -8 -5 1833.94 390.609 4
 -6 -8 -5 1603.88 321.567 5
 -6 -8 -6 5336.23 598.503 5
 -6 -8 -6 5674.61 706.17 4
 -6 -8 -7 183.597 165.98 4
 -6 -8 -7 216.838 137.43 5
 -6 -8 -8 3166.78 584.066 4
 -6 -8 -8 2537.14 420.984 5
 -6 -8 -9 500.976 240.121 4
 -6 -8 -9 428.068 156.484 5
 -6 -8 -10 819.788 311.707 4
 -6 -8 -11 153.066 179.686 4
 -6 -8 -12 -43.4013 161.502 4
 -6 -8 -13 158.638 155.485 4
 6 -8 13 0.27018 68.8447 1
 6 -9 -16 1439.17 418.586 3
 6 9 -16 1408.4 418.071 2
 6 -9 -15 380.587 196.084 3
 6 9 -15 405.928 226.168 2
 6 -9 -14 215.206 151.946 3
 6 9 -14 34.6017 63.675 2
 6 9 -13 210.487 156.701 2
 -6 -9 12 1201.97 234.662 5
 6 9 -12 1425.67 339.002 2
 6 9 -11 -26.3724 74.0763 2
 -6 -9 11 44.5736 69.2095 5
 -6 -9 10 5120.43 509.105 5
 6 9 -10 5181.69 593.468 2
 -6 -9 9 3359.73 418.332 5
 -6 -9 8 87.5367 73.3012 5
 -6 -9 7 -75.154 117.492 5
 -6 -9 6 2754.64 405.843 5
 -6 -9 5 4257.15 502.131 5
 -6 -9 4 1624.87 325.162 5
 -6 -9 3 2782.81 434.864 5
 -6 -9 2 53.1327 80.3634 5
 -6 -9 2 260.372 128.655 4
 -6 -9 1 1158.93 251.295 4
 -6 -9 1 1284.94 283.079 5
 -6 -9 0 5448.13 600.429 5
 -6 -9 0 5290.38 575.308 4
 -6 -9 -1 467.68 155.369 4
 -6 -9 -1 349.787 165.014 5
 -6 -9 -2 271.299 149.556 4
 -6 -9 -2 362.1 133.508 5
 -6 -9 -3 8724.15 781.66 5
 -6 -9 -3 7420.89 767.05 4
 -6 -9 -4 2650.86 470.148 4
 -6 -9 -4 2352.18 407.146 5
 -6 -9 -5 1692.57 373.48 4
 -6 -9 -5 1349.74 324.137 5
 -6 -9 -6 2492.48 482.998 4
 -6 -9 -6 2929.49 464.925 5
 -6 -9 -7 5298.18 631.223 5
 -6 -9 -7 5034.12 710.012 4
 -6 -9 -8 18.2843 52.3722 4
 -6 -9 -8 104.349 110.937 5
 -6 -9 -9 416.967 244.406 4
 -6 -9 -9 352.995 167.228 5
 -6 -9 -10 728.639 301.17 4
 -6 -9 -11 1086.93 363.191 4
 -6 -9 -12 1227.79 407.15 4
 -6 -9 -13 786.788 348.47 4
 6 -10 -16 685.679 304.785 3
 6 10 -16 777.867 297.002 2
 6 -10 -15 345.472 227.13 3
 6 10 -15 106.716 98.7135 2
 6 -10 -14 -63.6951 114.955 3
 6 10 -14 337.616 199.128 2
 6 10 -13 174.494 140.164 2
 -6 -10 12 405.773 142.072 5
 6 10 -12 745.174 246.992 2
 -6 -10 11 1458.42 274.39 5
 6 10 -11 1373.96 328.199 2
 -6 -10 10 1461.23 285.518 5
 6 10 -10 1895.3 361.648 2
 -6 -10 9 6163.63 599.191 5
 6 10 -9 6192.44 630.355 2
 -6 -10 8 5104.42 552.512 5
 -6 -10 7 1167.08 266.019 5
 -6 -10 6 3479.34 467.736 5
 -6 -10 5 10464.1 819.411 5
 -6 -10 4 2124.77 392.305 5
 -6 -10 3 1905.52 348.057 5
 -6 -10 2 1187.08 280.869 5
 -6 -10 2 1156.94 252.249 4
 -6 -10 1 3782.99 510.276 5
 -6 -10 1 3316.22 439.709 4
 -6 -10 0 1702.98 334.342 4
 -6 -10 0 2056.02 380.491 5
 -6 -10 -1 487.037 183.238 4
 -6 -10 -1 417.831 166.113 5
 -6 -10 -2 1502.59 339.047 4
 -6 -10 -2 1190.9 306.053 5
 -6 -10 -3 239.866 161.169 4
 -6 -10 -3 -23.1056 143.121 5
 -6 -10 -4 -101.463 153.337 4
 -6 -10 -4 149.055 142.02 5
 -6 -10 -5 -74.5176 162.225 4
 -6 -10 -5 148.003 158.515 5
 -6 -10 -6 1933.49 448.247 4
 -6 -10 -6 2849.93 473.787 5
 -6 -10 -7 355.615 205.937 4
 -6 -10 -7 222.612 141.074 5
 -6 -10 -8 -144.313 165.957 4
 -6 -10 -8 39.8878 49.9835 5
 -6 -10 -9 416.918 231.94 4
 -6 -10 -9 644.097 240.37 5
 -6 -10 -10 1461.66 423.669 4
 -6 -10 -11 197.407 137.786 4
 -6 -10 -12 51.4992 111.769 4
 6 -11 -15 170.901 160.038 3
 6 11 -15 -47.3743 142.013 2
 6 -11 -14 -170.017 143.573 3
 6 11 -14 -72.5954 85.9948 2
 6 -11 -13 359.924 223.871 3
 6 11 -13 676.392 266.859 2
 -6 -11 12 279.225 112.614 5
 6 11 -12 501.247 212.747 2
 -6 -11 11 120.065 73.4333 5
 6 11 -11 380.316 182.812 2
 -6 -11 10 787.972 216.25 5
 6 11 -10 1065.16 273.288 2
 6 11 -9 1032.35 263.822 2
 -6 -11 9 783.339 235.903 5
 -6 -11 8 3290.92 458.082 5
 -6 -11 7 8085.28 724.049 5
 -6 -11 6 3383.11 482.627 5
 -6 -11 5 8400.2 769.895 5
 -6 -11 4 1581.43 335.283 5
 -6 -11 3 411.385 178.819 5
 -6 -11 2 1827.45 369.152 5
 -6 -11 2 1994.68 339.508 4
 -6 -11 1 649.431 205.238 4
 -6 -11 1 546.518 210.722 5
 -6 -11 0 94.1446 77.7904 4
 -6 -11 0 333.217 183.676 5
 -6 -11 -1 938.128 266.574 4
 -6 -11 -1 1199.7 319.157 5
 -6 -11 -2 399.379 146.262 4
 -6 -11 -2 715.633 251.971 5
 -6 -11 -3 6728.09 746.049 5
 -6 -11 -3 7935.01 821.33 4
 -6 -11 -4 5843.27 697.294 5
 -6 -11 -4 6080.99 751.347 4
 -6 -11 -5 1090.5 333.638 4
 -6 -11 -5 1535.88 369.779 5
 -6 -11 -6 249.93 132.195 4
 -6 -11 -6 251.184 164.714 5
 -6 -11 -7 65.3028 122.618 4
 -6 -11 -7 370.696 199.451 5
 -6 -11 -8 95.1117 104.344 4
 -6 -11 -8 50.3764 74.0353 5
 -6 -11 -9 427.477 217.103 4
 -6 -11 -9 315.398 176.351 5
 -6 -11 -10 -227.249 177.802 4
 -6 -11 -11 79.4359 126.464 4
 6 12 -15 332.026 208.761 2
 6 -12 -14 1513.83 439.842 3
 6 12 -14 884.508 307.761 2
 6 -12 -13 13.5486 79.5369 3
 6 12 -13 -60.4596 153.74 2
 -6 -12 12 147.858 95.3288 5
 6 -12 -12 415.333 213.03 3
 6 12 -12 507.903 220.629 2
 -6 -12 11 -0.19123 91.8122 5
 6 12 -11 224.282 143.513 2
 -6 -12 10 -61.1038 73.6848 5
 6 12 -10 150.238 129.026 2
 -6 -12 9 762.006 237.123 5
 6 12 -9 828.155 247.967 2
 -6 -12 8 204.441 109.801 5
 6 12 -8 153.844 136.663 2
 -6 -12 7 704.119 215.196 5
 -6 -12 6 4849.02 601.005 5
 -6 -12 5 -27.9322 111.764 5
 -6 -12 4 226.088 149.565 5
 -6 -12 3 1365.29 336.261 5
 -6 -12 2 2053.6 351.371 4
 -6 -12 2 1902.91 387.761 5
 -6 -12 1 477.963 170.72 4
 -6 -12 1 425.52 184.457 5
 -6 -12 0 637.165 206.983 4
 -6 -12 0 308.8 171.798 5
 -6 -12 -1 1125.1 305.857 4
 -6 -12 -1 941.686 285.843 5
 -6 -12 -2 2392.41 449.667 4
 -6 -12 -2 1953.11 419.263 5
 -6 -12 -3 303.218 189.416 4
 -6 -12 -3 319.222 194.784 5
 -6 -12 -4 8429.13 875.656 5
 -6 -12 -4 9676.98 976.089 4
 -6 -12 -5 -293.049 183.195 4
 -6 -12 -5 135.385 148.724 5
 -6 -12 -6 410.603 219.514 4
 -6 -12 -6 832.424 284.848 5
 -6 -12 -7 -10.5413 170.176 4
 -6 -12 -7 10.4281 58.0864 5
 -6 -12 -8 940.73 334.172 4
 -6 -12 -8 780.287 275.917 5
 -6 -12 -9 273.842 210.136 4
 -6 -12 -9 179.599 146.882 5
 -6 -12 -10 1703.42 491.074 4
 6 -13 -14 800.343 314.464 3
 6 13 -14 290.086 168.643 2
 6 -13 -13 610.269 278.555 3
 6 13 -13 279.321 165.311 2
 6 -13 -12 239.992 166.525 3
 6 13 -12 206.059 154.111 2
 -6 -13 11 162.131 101.43 5
 6 13 -11 297.4 168.607 2
 -6 -13 10 556.297 201.417 5
 6 13 -10 390.78 177.92 2
 -6 -13 9 354.876 150.498 5
 6 13 -9 533.201 200.179 2
 -6 -13 8 309.332 150.099 5
 6 13 -8 247.603 141.131 2
 6 13 -7 10.6593 85.3116 2
 -6 -13 7 -89.5215 119.058 5
 6 13 -6 271.862 134.087 2
 -6 -13 6 492.363 229.274 5
 -6 -13 5 -105.91 121.505 5
 -6 -13 4 132.669 110.935 5
 -6 -13 3 2947.03 509.522 5
 -6 -13 2 118.226 116.588 4
 -6 -13 2 -93.9235 95.1791 5
 -6 -13 1 213.089 147.34 4
 -6 -13 1 22.0087 50.8766 5
 -6 -13 0 1868.96 377.063 4
 -6 -13 0 1150.41 326.752 5
 -6 -13 -1 6311.52 779.117 5
 -6 -13 -1 6941.07 761.407 4
 -6 -13 -2 1365.75 349.969 4
 -6 -13 -2 1143.49 320.593 5
 -6 -13 -3 553.335 226.164 4
 -6 -13 -3 273.591 154.07 5
 -6 -13 -4 1247.12 361.507 4
 -6 -13 -4 863.323 316.721 5
 -6 -13 -5 -39.9703 88.9088 4
 -6 -13 -5 5788.24 817.981 5
 -6 -13 -6 -70.5577 153.161 4
 -6 -13 -6 584.882 254.946 5
 -6 -13 -7 7.63876 143.873 4
 -6 -13 -7 597.112 253.817 5
 -6 -13 -8 23.915 89.3891 4
 -6 -13 -8 129.385 147.134 5
 -6 -13 -9 85.8946 98.7474 4
 -6 -13 -9 380.063 200.255 5
 -6 -13 -10 771.578 380.618 4
 6 14 -14 35.2978 106.557 2
 6 -14 -13 486.937 252.631 3
 6 14 -13 96.0708 83.6336 2
 6 -14 -12 226.05 173.776 3
 6 14 -12 83.045 119.007 2
 -6 -14 11 94.3579 54.3469 5
 6 -14 -11 -21.0124 96.2688 3
 6 14 -11 -91.035 119.488 2
 -6 -14 10 -1.4154 47.8479 5
 6 -14 -10 14.8369 73.0089 3
 6 14 -10 139.387 67.2566 2
 -6 -14 9 1001.25 283.178 5
 6 14 -9 760.094 240.164 2
 -6 -14 8 148.324 137.667 5
 6 14 -8 93.9155 89.032 2
 -6 -14 7 153.779 132.22 5
 6 14 -7 178.566 125.129 2
 6 14 -6 778.079 214.269 2
 -6 -14 6 372.742 187.199 5
 6 14 -5 2030.36 334.086 2
 -6 -14 5 1199.03 321.931 5
 -6 -14 4 780.427 281.991 5
 -6 -14 3 57.1076 95.7216 5
 -6 -14 2 1401.6 316.236 4
 -6 -14 2 2039.35 435.132 5
 -6 -14 1 2706.64 453.205 4
 -6 -14 1 2846.73 524.586 5
 -6 -14 0 1112.8 308.218 4
 -6 -14 0 1498.19 387.493 5
 -6 -14 -1 531.418 248.513 4
 -6 -14 -1 334.08 228.357 5
 -6 -14 -2 3931.03 608.272 4
 -6 -14 -2 4084.42 643.079 5
 -6 -14 -3 -333.884 162.145 4
 -6 -14 -3 189.216 191.164 5
 -6 -14 -4 -105.832 92.8547 4
 -6 -14 -4 35.0126 130.224 5
 -6 -14 -5 630.656 261.066 4
 -6 -14 -5 113.375 112.593 5
 -6 -14 -6 174.116 83.1762 4
 -6 -14 -6 329.855 195.031 5
 -6 -14 -7 220.848 86.961 4
 -6 -14 -7 406.572 215.076 5
 -6 -14 -8 -36.5716 156.234 4
 -6 -14 -8 349.232 214.051 5
 -6 -14 -9 69.7544 171.431 4
 -6 -14 -9 128.806 160.174 5
 6 15 -13 117.834 106.593 2
 6 -15 -12 156.189 173.333 3
 6 15 -12 160.74 156.914 2
 -6 -15 11 52.8573 69.3156 5
 6 -15 -11 -63.0662 98.4504 3
 6 15 -11 67.2442 96.1388 2
 -6 -15 10 219.046 143.255 5
 6 -15 -10 -192.383 163.778 3
 6 15 -10 260.157 152.191 2
 -6 -15 9 206.577 134.75 5
 6 -15 -9 134.867 129.774 3
 6 15 -9 68.0088 97.4106 2
 -6 -15 8 12.7615 68.2213 5
 6 -15 -8 90.4197 128.026 3
 6 15 -8 88.4756 89.6177 2
 -6 -15 7 36.306 90.5427 5
 6 -15 -7 49.3932 95.2321 3
 6 15 -7 49.3001 50.1848 2
 -6 -15 6 68.4677 89.3897 5
 6 15 -6 245.795 142.38 2
 -6 -15 5 311.679 165.055 5
 6 15 -5 393.249 157.688 2
 -6 -15 4 165.168 134.427 5
 -6 -15 3 1427.88 372.652 5
 -6 -15 2 1452.66 330.498 4
 -6 -15 2 1214.78 338.311 5
 -6 -15 1 4336.94 667.965 5
 -6 -15 1 4344.43 584.241 4
 -6 -15 0 2456.49 456.86 4
 -6 -15 0 2975.55 564.589 5
 -6 -15 -1 1107.54 320.292 4
 -6 -15 -1 1246.28 364.464 5
 -6 -15 -2 485.137 242.778 4
 -6 -15 -2 220.527 179.996 5
 -6 -15 -3 517.608 231.784 4
 -6 -15 -3 386.642 240.091 5
 -6 -15 -4 1964.19 473.801 4
 -6 -15 -4 1991.87 483.327 5
 -6 -15 -5 4.50532 62.112 4
 -6 -15 -5 60.277 77.7054 5
 -6 -15 -6 -71.6711 156.347 4
 -6 -15 -6 211.424 190.774 5
 -6 -15 -7 -188.416 241.397 4
 -6 -15 -7 -78.3353 108.06 5
 -6 -15 -8 -126.313 201.676 4
 -6 -15 -8 559.098 277.613 5
 -6 -15 -9 941.402 345.033 5
 6 16 -13 31.8716 115.371 2
 6 16 -12 201.547 135.848 2
 6 -16 -11 -198.575 174.539 3
 6 16 -11 -209.002 155.458 2
 -6 -16 10 82.8064 65.092 5
 6 16 -10 -10.0733 52.7208 2
 -6 -16 9 31.2516 66.8687 5
 6 -16 -9 110.48 121.671 3
 6 16 -9 158.241 141.782 2
 -6 -16 8 64.2158 80.5372 5
 6 16 -8 123.382 83.3837 2
 -6 -16 7 81.9216 99.2636 5
 6 -16 -7 39.4824 74.2884 3
 6 16 -7 -84.9396 89.1907 2
 6 -16 -6 2323.81 455.777 3
 -6 -16 6 2347.44 479.969 5
 6 -16 -5 250.384 147.236 3
 -6 -16 5 263.821 135.518 5
 6 -16 -4 189.958 134.344 3
 -6 -16 4 59.3418 68.6628 5
 6 -16 -3 1104.94 281.314 3
 -6 -16 3 881.27 302.029 5
 -6 -16 2 2.84762 56.8295 4
 -6 -16 2 26.6064 105.432 5
 -6 -16 1 718.396 242.013 4
 -6 -16 1 748.616 264.582 5
 -6 -16 0 2101.11 433.91 4
 -6 -16 0 1906.56 467.915 5
 -6 -16 -1 1295.21 352.578 4
 -6 -16 -1 555.677 275.543 5
 -6 -16 -2 632.057 263.352 4
 -6 -16 -2 800.581 297.32 5
 -6 -16 -3 262.881 160.86 4
 -6 -16 -3 382.458 224.886 5
 -6 -16 -4 793.193 293.423 4
 -6 -16 -4 615.559 281.021 5
 -6 -16 -5 1115.09 361.018 4
 -6 -16 -5 854.664 321.27 5
 -6 -16 -6 928.657 345.798 4
 -6 -16 -6 1339.07 422.414 5
 -6 -16 -7 1387.63 459.005 4
 -6 -16 -7 1254.08 416.036 5
 -6 -16 -8 194.174 169.451 5
 -6 -16 -9 -154.587 147.962 5
 6 17 -12 -92.6069 117.682 2
 6 -17 -11 271.1 197.182 3
 6 17 -11 199.908 182.997 2
 -6 -17 10 499.104 217.268 5
 6 -17 -10 942.594 350.988 3
 6 17 -10 804.754 284.864 2
 6 -17 -9 1779.02 463.654 3
 -6 -17 9 2532.29 494.958 5
 6 17 -9 1463.68 365.945 2
 6 -17 -8 -66.4374 104.618 3
 -6 -17 8 93.5998 120.989 5
 6 -17 -7 31.442 85.3996 3
 -6 -17 7 175.306 162.997 5
 6 -17 -6 1034.33 319.704 3
 -6 -17 6 930.836 311.046 5
 6 -17 -5 828.829 279.415 3
 -6 -17 5 1794.49 432.744 5
 6 -17 -4 1891.67 401.626 3
 -6 -17 4 2087.11 484.176 5
 6 -17 -3 861.157 257.524 3
 -6 -17 3 814.324 307.047 5
 -6 -17 2 435.379 229.203 5
 -6 -17 2 359.962 170.021 4
 -6 -17 1 140.065 123.528 4
 -6 -17 1 114.439 121.573 5
 -6 -17 0 1354.21 362.171 4
 -6 -17 0 970.835 330.781 5
 -6 -17 -1 -197.321 146.322 4
 -6 -17 -1 -148.502 158.475 5
 -6 -17 -2 -268.19 177.776 4
 -6 -17 -2 160.556 177.86 5
 -6 -17 -3 -46.052 72.0394 4
 -6 -17 -3 132.122 125.657 5
 -6 -17 -4 517.272 245.781 4
 -6 -17 -4 567.975 267.83 5
 -6 -17 -5 218.223 180.064 4
 -6 -17 -5 426.16 255.385 5
 -6 -17 -6 339.766 228.363 4
 -6 -17 -6 199.868 182.809 5
 -6 -17 -7 203.583 195.633 5
 -6 -17 -8 1643.49 481.566 5
 6 -18 -10 688.486 307.678 3
 -6 -18 10 261.389 177.89 5
 6 -18 -9 -44.839 93.574 3
 -6 -18 9 95.2769 89.3642 5
 6 -18 -8 195.072 175.172 3
 -6 -18 8 9.02335 57.4228 5
 6 -18 -7 3019.96 580.973 3
 -6 -18 7 2676.28 540.521 5
 6 -18 -6 1012.65 326.93 3
 -6 -18 6 597.531 269.725 5
 6 -18 -5 374.686 206.992 3
 -6 -18 5 719.743 292.95 5
 -6 -18 4 114.507 102.049 5
 -6 -18 3 918.823 350.395 5
 -6 -18 2 -426.007 237.957 5
 -6 -18 1 456.616 213.292 4
 -6 -18 1 336.308 195.24 5
 -6 -18 0 -286.257 173.807 4
 -6 -18 0 150.094 151.715 5
 -6 -18 -1 102.757 115.622 4
 -6 -18 -1 -338.729 225.7 5
 -6 -18 -2 -21.4966 81.4466 4
 -6 -18 -2 49.6574 104.355 5
 -6 -18 -3 -104.89 123.014 4
 -6 -18 -3 -159.445 154.406 5
 -6 -18 -4 -218.06 178.619 4
 -6 -18 -4 -1.73368 71.8719 5
 -6 -18 -5 892.971 356.468 4
 -6 -18 -5 1545.87 481.809 5
 6 -19 -9 591.219 287.017 3
 -6 -19 9 474.927 238.78 5
 6 -19 -8 301.697 202.509 3
 -6 -19 8 348.066 202.078 5
 6 -19 -7 87.3592 163.87 3
 -6 -19 7 -14.3295 59.6749 5
 6 -19 -6 176.519 155.337 3
 -6 -19 6 133.388 138.618 5
 -6 -19 5 87.222 113.56 5
 -6 -19 4 182.069 188.04 5
 -6 -19 3 88.7103 153.985 5
 -6 -19 2 170.575 164.321 5
 -6 -19 1 29.5258 81.9219 5
 -6 -19 0 -260.62 197.481 5
 -6 -19 -1 449.582 213.458 4
 -6 -19 -1 190.37 150.13 5
 -6 -19 -2 196.006 160.108 4
 -6 -19 -2 8.03356 131.11 5
 -6 -19 -3 283.925 198.983 4
 -6 -19 -4 187.107 164.991 4
 6 -20 -8 254.484 200.034 3
 -6 -20 8 164.926 162.764 5
 6 -20 -7 -130.085 139.673 3
 -6 -20 7 -146.384 140.092 5
 -6 -20 6 1091.45 382.89 5
 -6 -20 5 167.816 148.862 5
 -6 -20 4 -110.981 137.617 5
 6 -20 1 481.712 254.593 5
 -6 -20 -2 407.487 245.772 4
 -6 -20 -3 430.861 242.464 4
 6 -21 0 205.776 178.389 5
 7 0 -19 -261.503 177.618 2
 7 0 -18 114.266 115.373 2
 7 0 -17 567.792 236.88 2
 7 0 -16 -15.2731 67.8474 2
 7 0 -15 563.836 204.265 2
 -7 0 14 -79.609 81.2031 5
 7 0 -14 327.277 168.556 2
 -7 0 13 1251.06 239.339 5
 -7 0 12 -114.278 87.1865 5
 -7 0 11 3562.18 366.978 5
 -7 0 10 14.1217 58.1945 5
 -7 0 9 3742.78 355.449 5
 -7 0 8 -42.0275 55.134 5
 -7 0 7 3362.11 329.955 5
 -7 0 6 -24.7439 45.8395 5
 -7 0 5 26693.4 883.858 5
 -7 0 4 57.4346 68.1719 5
 -7 0 3 1239.64 178.735 5
 -7 0 2 -21.5106 41.8878 5
 -7 0 1 53977.7 1165.97 5
 -7 0 0 325.864 107.37 5
 -7 0 -1 38660.6 957.237 5
 -7 0 -2 22.1838 36.2994 5
 -7 0 -3 11499.5 500.414 5
 -7 0 -4 -35.9629 36.7249 5
 -7 0 -5 3344.13 256.131 5
 7 0 5 2795.72 382.744 1
 -7 0 -5 3082.06 421.291 4
 -7 0 -6 82.4254 91.3357 4
 -7 0 -6 -52.2415 31.5666 5
 7 0 6 -68.8141 99.7198 1
 7 0 7 8758.43 729.257 1
 -7 0 -7 9177.86 771.467 4
 -7 0 -8 -35.7841 51.4674 4
 7 0 8 218.472 155.687 1
 -7 0 -9 1983.2 386.246 4
 7 0 9 1574 339.481 1
 -7 0 -10 17.8178 75.2903 4
 7 0 10 -63.8441 121.351 1
 -7 0 -11 2121.9 417.312 4
 7 0 11 2075.98 402.196 1
 7 0 12 -175.705 123.585 1
 7 0 13 6.4967 60.7465 1
 7 0 14 -0.28404 75.1523 1
 7 -1 -19 -107.723 114.118 2
 7 1 -19 -95.3368 120.401 2
 7 -1 -18 114.179 146.926 3
 7 -1 -18 192.883 146.211 2
 7 1 -18 1.97143 53.2066 2
 7 -1 -17 -130.978 117.145 2
 7 1 -17 13.133 58.7579 2
 7 1 -16 1053.21 309.49 2
 7 -1 -16 1233.88 307.174 2
 7 -1 -15 754.195 232.828 2
 -7 -1 15 864.677 202.28 5
 7 1 -15 606.273 223.222 2
 7 1 -14 1073.97 290.623 2
 7 -1 -14 1253.59 288.476 2
 -7 -1 14 1020.02 213.685 5
 -7 1 13 715.205 184.676 5
 -7 -1 13 1041.99 207.149 5
 -7 1 12 8620.67 608.187 5
 -7 -1 12 9466.93 608.294 5
 -7 -1 11 469.331 129.494 5
 -7 1 11 703.736 171.666 5
 -7 1 10 888.898 182.525 5
 -7 -1 10 857.177 173.986 5
 -7 1 9 178.058 79.2481 5
 -7 -1 9 161.843 70.4452 5
 -7 -1 8 27.7525 43.1656 5
 -7 1 8 33.7032 47.5142 5
 -7 1 7 188.812 73.0266 5
 -7 -1 7 283.237 90.3367 5
 -7 1 6 1270.87 196.004 5
 -7 -1 6 1442.06 210.323 5
 -7 1 5 318.672 95.3153 5
 -7 -1 5 282.418 98.078 5
 -7 1 4 5491.02 383.237 5
 -7 -1 4 5552.41 401.233 5
 -7 1 3 8477.25 469.015 5
 -7 -1 3 9267.34 517.822 5
 -7 -1 2 7319.16 462.566 5
 -7 1 2 7504.68 427.724 5
 -7 -1 1 2986.86 289.554 5
 -7 1 1 2616.58 250.684 5
 -7 -1 0 5604.17 395.049 5
 -7 1 0 5811.78 365.667 5
 -7 1 -1 217.383 65.6263 5
 -7 -1 -1 220.255 77.0866 5
 -7 1 -2 26992.2 735.945 5
 -7 -1 -2 27516.5 854.844 5
 -7 1 -3 1753.1 181.662 5
 -7 -1 -3 1754.91 217.916 5
 -7 -1 -3 1851.27 312.115 4
 -7 -1 -4 2782.86 264.726 5
 -7 1 -4 2967.39 229.528 5
 -7 -1 -4 3449.76 443.674 4
 -7 1 -5 2660.13 200.17 5
 -7 -1 -5 2793.61 259.553 5
 7 1 5 2784.01 383.984 1
 -7 -1 -5 3348.04 446.02 4
 -7 -1 -6 -21.8729 101.325 4
 -7 1 -6 142.837 43.6416 5
 -7 -1 -6 192.902 64.1101 5
 7 1 6 75.0131 91.7984 1
 -7 1 -6 67.7838 93.1733 4
 -7 -1 -7 -29.6542 125.337 4
 7 1 7 160.907 101.963 1
 7 -1 7 153.702 107.018 1
 -7 1 -7 66.2437 89.0459 4
 -7 1 -8 1223.52 290.805 4
 -7 -1 -8 908.395 256.568 4
 7 1 8 930.167 249.605 1
 7 -1 8 844.935 233.117 1
 -7 1 -9 411.482 160.964 4
 -7 -1 -9 43.5776 71.0097 4
 7 1 9 416.187 174.314 1
 7 -1 9 252.993 153.355 1
 -7 1 -10 259.527 129.004 4
 -7 -1 -10 159.049 109.607 4
 7 -1 10 99.5657 103.5 1
 7 1 10 81.1853 50.8356 1
 -7 -1 -11 -20.876 106.316 4
 7 -1 11 -141.658 104.483 1
 7 1 11 61.7451 71.7474 1
 -7 -1 -12 477.291 216.202 4
 7 1 12 521.137 222.302 1
 7 -1 12 505.987 210.668 1
 7 1 13 362.692 165.727 1
 7 -1 13 167.467 119.139 1
 7 1 14 279.545 171.929 1
 7 -1 14 136.923 159.935 1
 7 -2 -19 628.694 266.389 2
 7 -2 -18 733.845 281.114 3
 7 -2 -18 578.93 234.768 2
 7 2 -18 497.234 241.334 2
 7 -2 -17 -31.3169 69.5868 2
 7 2 -17 428.705 235.494 2
 7 2 -16 100.751 155.399 2
 7 -2 -16 163.989 109.232 2
 7 -2 -15 936.369 251.163 2
 -7 -2 15 850.302 195.684 5
 7 2 -15 783.433 268.817 2
 7 -2 -14 272.673 154.255 2
 -7 -2 14 550.106 157.796 5
 7 2 -14 249.074 160.461 2
 -7 -2 13 132.414 79.3713 5
 -7 -2 12 -29.5508 27.8192 5
 -7 2 12 137.322 97.6042 5
 -7 -2 11 51.9168 54.1946 5
 -7 2 11 58.7717 77.1937 5
 -7 2 10 319.305 124.001 5
 -7 -2 10 458.754 123.534 5
 -7 2 9 2086.78 275.319 5
 -7 -2 9 2272.19 281.786 5
 -7 2 8 1824.71 250.444 5
 -7 -2 8 1716.74 241.055 5
 -7 2 7 3440.34 333.714 5
 -7 -2 7 3318.11 332.643 5
 -7 2 6 2991.06 299.275 5
 -7 -2 6 2670.25 294.395 5
 -7 2 5 56.9132 53.0948 5
 -7 -2 5 189.786 60.2743 5
 -7 -2 4 16295.6 729.875 5
 -7 2 4 16454.4 666.725 5
 -7 -2 3 14307.5 684.115 5
 -7 2 3 15122.4 620.399 5
 -7 2 2 5002.6 345.145 5
 -7 -2 2 4994.3 397.759 5
 -7 2 1 2548.87 238.322 5
 -7 -2 1 2872.5 304.714 5
 -7 2 0 18.3268 29.7597 5
 -7 -2 0 48.9743 38.5014 5
 -7 2 -1 4395.2 298.833 5
 -7 -2 -1 4278.6 367.679 5
 -7 2 -2 2997.26 236.172 5
 -7 -2 -2 3048.34 308.913 5
 -7 -2 -2 2914.48 389.804 4
 -7 2 -3 664.134 108.319 5
 -7 -2 -3 568.508 128.681 5
 -7 -2 -3 552.77 175.325 4
 -7 -2 -4 4346.98 367.786 5
 -7 2 -4 4552.42 264.608 5
 -7 -2 -4 4542.21 519.93 4
 7 2 5 288.059 101.944 1
 -7 -2 -5 293.05 158.368 4
 -7 2 -5 222.4 54.278 5
 -7 -2 -5 171.912 74.9727 5
 7 2 6 -125.844 127.332 1
 -7 -2 -6 -11.9565 64.698 4
 -7 -2 -6 33.3054 34.7183 5
 7 2 7 14497.4 938.476 1
 -7 -2 -7 14269.9 1018.46 4
 -7 -2 -8 551 218.645 4
 7 2 8 544.996 194.722 1
 7 -2 8 445.513 172.891 1
 -7 2 -8 646.527 207.123 4
 -7 -2 -9 387.901 197.513 4
 7 2 9 317.103 138.883 1
 7 -2 9 415.85 172.073 1
 -7 2 -9 733.982 208.049 4
 -7 -2 -10 581.215 247.776 4
 7 -2 10 239.081 139.774 1
 7 2 10 291.351 153.515 1
 -7 2 -10 435.83 192.285 4
 -7 -2 -11 311.822 172.437 4
 7 -2 11 132.501 139.537 1
 7 2 11 250.212 166.059 1
 -7 -2 -12 99.2739 95.1525 4
 7 -2 12 99.794 45.1993 1
 7 2 12 143.106 131.419 1
 7 2 13 350.327 167.604 1
 -7 -2 -13 651.889 266.849 4
 7 -2 13 324.909 177.103 1
 7 2 14 1.41766 51.1438 1
 7 -2 14 -65.0191 89.0771 1
 7 -3 -19 153.236 142.961 3
 7 -3 -18 72.9247 69.3629 3
 7 -3 -18 143.5 116.103 2
 7 3 -18 28.5784 58.6538 2
 7 -3 -17 102.959 98.219 2
 7 3 -17 455.592 234.824 2
 7 3 -16 243.069 158.787 2
 7 -3 -16 154.823 118.785 2
 -7 -3 15 89.1741 69.8998 5
 7 -3 -15 39.7011 52.359 2
 7 -3 -14 463.949 170.388 2
 7 3 -14 816.709 249.887 2
 -7 -3 14 743.31 174.268 5
 -7 -3 13 -29.2129 25.0382 5
 -7 -3 12 484.73 128.05 5
 -7 -3 11 4665.11 416.37 5
 -7 3 10 4463.2 432.485 5
 -7 -3 10 4242.22 390.646 5
 -7 3 9 109.412 65.7281 5
 -7 -3 9 268.187 99.6387 5
 -7 3 8 19.1762 45.7764 5
 -7 -3 8 50.3223 31.4645 5
 -7 3 7 70.8965 60.0469 5
 -7 -3 7 123.054 75.9464 5
 -7 3 6 820.419 160.363 5
 7 3 -6 813.631 95.0136 1
 -7 -3 6 851.292 173.095 5
 7 3 -5 6731.54 324.78 1
 -7 3 5 7045.8 462.198 5
 -7 -3 5 6238.28 475.463 5
 -7 -3 4 16305.5 768.72 5
 -7 3 4 16022.2 680.477 5
 7 3 -4 15203.5 546.016 1
 -7 -3 3 6761.23 491.828 5
 -7 3 3 6026.56 397.815 5
 7 3 -3 5588.19 359.286 1
 -7 -3 2 16486.4 776.58 5
 7 3 -2 15628 648.036 1
 -7 3 2 15058.3 612.539 5
 -7 -3 1 19362.1 843.254 5
 7 3 -1 21388.8 804.529 1
 -7 3 1 20419.3 687.281 5
 -7 -3 0 2014.12 270.827 5
 -7 3 0 2400.41 229.336 5
 -7 3 -1 2218.53 214.348 5
 -7 -3 -1 1763.1 249.864 5
 -7 3 -2 787.878 120.533 5
 -7 -3 -2 835.507 172.054 5
 -7 -3 -2 1125.7 249.604 4
 -7 3 -3 427.453 88.3578 5
 -7 -3 -3 341.398 148.638 4
 -7 -3 -3 337.932 105.064 5
 -7 3 -4 5599.15 298.423 5
 -7 -3 -4 5765.61 459.705 5
 7 3 4 5684.89 532.185 1
 -7 -3 -4 6276.53 624.697 4
 -7 3 -5 2295.03 174.081 5
 -7 -3 -5 2246.18 394.794 4
 -7 -3 -5 2076.98 273.162 5
 7 3 5 2539.27 371.175 1
 -7 -3 -6 98.0521 105.974 4
 7 3 6 104.348 94.997 1
 -7 -3 -6 73.8889 62.4721 5
 -7 -3 -7 1952.45 392.314 4
 -7 -3 -7 2052.99 265.773 5
 7 3 7 2042.89 348.857 1
 -7 -3 -8 3421.17 539.522 4
 7 3 8 3003.82 447.303 1
 -7 -3 -9 3483 552.54 4
 7 -3 9 3787.04 517.2 1
 7 3 9 3849.63 526.443 1
 -7 -3 -10 -12.0575 97.2863 4
 7 3 10 73.1235 43.2941 1
 7 -3 10 -98.9764 109.667 1
 -7 -3 -11 -84.8978 121.666 4
 7 3 11 59.6656 62.0136 1
 7 -3 11 113.428 83.5814 1
 -7 -3 -12 503.976 237.602 4
 7 -3 12 784.072 248.745 1
 7 3 12 605.399 218.305 1
 7 3 13 538.303 207.195 1
 7 -3 13 583.201 233.561 1
 -7 -3 -13 772.522 293.323 4
 7 -3 14 52.1962 101.631 1
 7 3 14 79.0408 126.361 1
 7 -4 -19 99.7555 142.699 3
 7 -4 -18 181.944 147.802 3
 7 4 -18 361.642 202.47 2
 7 -4 -17 186.076 133.464 2
 7 4 -17 462.935 221.176 2
 7 -4 -16 -41.8774 92.8382 2
 7 4 -16 120.899 112.591 2
 7 4 -15 674.538 247.768 2
 7 -4 -15 509.253 189.342 2
 -7 -4 14 255.135 102.825 5
 7 4 -14 515.979 207.971 2
 7 -4 -14 674.197 206.652 2
 -7 -4 13 763.305 177.361 5
 -7 -4 12 2150.95 290.516 5
 -7 -4 11 144.273 74.0616 5
 -7 -4 10 6095.71 486.515 5
 -7 4 9 897.86 194.557 5
 -7 -4 9 1090.66 204.2 5
 -7 4 8 199.646 90.204 5
 -7 -4 8 216.048 86.4621 5
 -7 4 7 4379.16 408.437 5
 -7 -4 7 4779.25 432.759 5
 -7 4 6 3272.69 337.186 5
 -7 -4 6 3373.29 361.644 5
 -7 4 5 7694.37 503.565 5
 -7 -4 5 7499 547.997 5
 7 4 -5 7321.02 327.777 1
 -7 4 4 832.518 162.911 5
 -7 -4 4 851.299 179.209 5
 7 4 -4 825.591 127.936 1
 -7 4 3 176.02 77.9089 5
 7 4 -3 114.251 45.5418 1
 -7 -4 3 205.053 82.5187 5
 -7 4 2 -39.4226 55.9164 5
 7 4 -2 -7.27113 32.7106 1
 -7 -4 2 25.8841 47.1645 5
 -7 4 1 2749.26 265.325 5
 -7 -4 1 2734.35 333.289 5
 7 4 -1 3094.42 308.341 1
 -7 4 0 -9.77028 34.1359 5
 -7 -4 0 44.0223 48.7429 5
 -7 4 -1 1102.71 156.67 5
 -7 -4 -1 1230.08 223.028 5
 -7 -4 -1 1190.74 265.284 4
 -7 -4 -2 8067.05 576.84 5
 7 4 2 8508.82 596.988 1
 -7 4 -2 8271.79 413.414 5
 -7 -4 -2 9557.08 748.037 4
 -7 -4 -3 118.871 105.603 4
 -7 4 -3 70.9507 38.2932 5
 7 4 3 170.565 106.956 1
 -7 -4 -3 240.776 111.44 5
 -7 -4 -4 1907.29 361.809 4
 -7 -4 -4 2772 342.536 5
 7 4 4 2041.33 319.098 1
 -7 -4 -5 4885.69 455.133 5
 7 4 5 5772.84 565.185 1
 -7 -4 -5 5400.04 626.524 4
 -7 -4 -6 5211.71 472.916 5
 7 4 6 5567.99 572.182 1
 -7 -4 -6 5354.94 643.767 4
 7 4 7 1665.39 322.406 1
 -7 -4 -7 1467.37 348.28 4
 -7 -4 -7 1480.41 248.857 5
 -7 -4 -8 134.036 97.921 4
 7 4 8 92.2816 70.24 1
 -7 -4 -9 88.0339 63.0989 4
 7 4 9 176.873 141.434 1
 -7 -4 -10 373.001 203.958 4
 7 4 10 268.112 138.409 1
 7 -4 10 391.97 192.614 1
 -7 -4 -11 48.0894 107.013 4
 7 4 11 96.6985 94.9269 1
 7 -4 11 334.482 204.62 1
 -7 -4 -12 314.148 208.581 4
 7 4 12 204.709 146.553 1
 7 -4 12 408.281 186.983 1
 -7 -4 -13 -8.50367 113.639 4
 7 -4 13 -41.8611 70.3608 1
 7 4 13 38.7969 109.099 1
 -7 -4 -14 42.494 102.77 4
 7 -4 14 1.46358 50.1957 1
 7 -5 -19 202.361 226.392 3
 7 -5 -18 -13.7407 66.1796 3
 7 5 -17 -52.3813 79.5798 2
 7 -5 -16 566.524 204.936 2
 7 5 -16 838.089 289.579 2
 7 5 -15 248.45 142.248 2
 7 -5 -15 -10.5577 85.0596 2
 7 5 -14 -68.3269 152.474 2
 -7 -5 14 -13.7073 41.4415 5
 7 -5 -14 -10.3125 34.9372 2
 7 5 -13 722.948 242.448 2
 -7 -5 13 348.497 113.672 5
 -7 -5 12 4152.51 410.981 5
 -7 -5 11 268.245 112.199 5
 -7 -5 10 145.034 75.9674 5
 -7 -5 9 6878.95 525.449 5
 -7 -5 8 3946.13 403.193 5
 -7 -5 7 495.706 154.148 5
 -7 -5 6 7246.48 562.289 5
 -7 5 5 2563.03 306.997 5
 -7 -5 5 3050.34 366.221 5
 -7 5 4 18.5572 43.7024 5
 -7 -5 4 -47.2467 80.7722 5
 7 5 -4 23.9124 22.7405 1
 -7 5 3 21770.4 834.827 5
 -7 -5 3 23279.9 1035.85 5
 7 5 -3 23184.2 741.081 1
 -7 5 2 2715.37 287.601 5
 -7 -5 2 2941.33 373.965 5
 7 5 -2 2607.48 272.14 1
 -7 5 1 579.601 129.854 5
 -7 -5 1 521.034 155.702 5
 -7 5 0 13832.4 604.372 5
 -7 -5 0 14040.5 811.433 5
 -7 -5 0 14641.2 886.297 4
 -7 -5 -1 156.824 131.386 4
 -7 -5 -1 17.0356 43.2351 5
 -7 -5 -2 11934.3 753.231 5
 7 5 2 11517.5 707.598 1
 -7 -5 -2 11488.6 847.728 4
 -7 -5 -3 210.844 114.102 4
 7 5 3 423.315 140.126 1
 -7 -5 -3 333.726 119.171 5
 7 5 4 186.65 128.37 1
 -7 -5 -4 98.6236 58.7209 4
 -7 -5 -4 -64.0644 57.1426 5
 -7 -5 -5 2035.03 393.966 4
 7 5 5 1965.13 323.712 1
 -7 -5 -5 1992.39 311.497 5
 -7 -5 -6 552.977 210.197 4
 7 5 6 607.534 185.407 1
 -7 -5 -6 498.569 160.993 5
 -7 -5 -7 568.764 225.168 4
 -7 -5 -7 933.135 213.026 5
 7 5 7 838.416 229.464 1
 -7 -5 -8 58.5624 112.296 4
 7 5 8 302.661 129.214 1
 -7 -5 -9 1087.97 323.944 4
 7 5 9 703.704 226.643 1
 -7 -5 -10 -175.824 113.948 4
 7 5 10 -75.0839 47.6373 1
 -7 -5 -11 211.881 149.028 4
 7 5 11 252.384 150.803 1
 7 -5 11 459.244 194.608 1
 -7 -5 -12 887.385 326.837 4
 7 -5 12 315.936 161.499 1
 -7 -5 -13 386.114 227.252 4
 7 -5 13 711.623 245.912 1
 7 -5 14 129.82 122.275 1
 -7 -5 -14 -79.7263 112.575 4
 7 -6 -18 373.985 236.033 3
 7 -6 -17 -146.939 139.683 3
 7 6 -17 14.2633 107.511 2
 7 6 -16 743.656 280.073 2
 7 6 -15 -10.4408 119.05 2
 7 -6 -15 32.0522 60.6345 2
 7 -6 -14 1743.35 314.052 2
 -7 -6 14 1827.3 277.837 5
 7 6 -14 2017 406.705 2
 7 6 -13 468.007 186.703 2
 -7 -6 13 575.832 159.517 5
 -7 -6 12 5.0775 46.7237 5
 -7 -6 11 4068.93 416.711 5
 -7 -6 10 182.956 95.6253 5
 -7 -6 9 3707.26 401.783 5
 -7 -6 8 1164.77 223.319 5
 -7 -6 7 67.3252 73.6227 5
 -7 -6 6 183.28 102.533 5
 -7 -6 5 23.8872 75.0103 5
 -7 -6 4 577.2 156.7 5
 -7 -6 3 7499.22 616.417 5
 -7 -6 2 2565.95 363.43 5
 7 6 -2 2764.29 276.138 1
 -7 -6 1 5068.88 507.319 5
 -7 -6 0 9461.59 699.797 5
 -7 -6 0 9030.99 728.405 4
 -7 -6 -1 1957.13 353.754 4
 -7 -6 -1 2485.73 361.823 5
 7 6 1 1867.06 268.644 1
 -7 -6 -2 7576.43 640.189 5
 7 6 2 8592.14 609.805 1
 -7 -6 -2 8082.52 728.802 4
 -7 -6 -3 1959.68 325.202 5
 7 6 3 2154.99 317.923 1
 -7 -6 -3 2702.13 438.943 4
 7 6 4 1804.26 303.659 1
 -7 -6 -4 2203.73 412.853 4
 -7 -6 -4 2097.74 337.783 5
 7 6 5 2581.49 369.113 1
 -7 -6 -5 2078.44 411.024 4
 -7 -6 -5 2402.47 360.468 5
 -7 -6 -6 298.696 138.018 4
 7 6 6 144.558 96.8125 1
 -7 -6 -6 193.411 117.465 5
 -7 -6 -7 508.737 209.195 4
 -7 -6 -7 580.174 182.333 5
 7 6 7 312.046 141.807 1
 7 6 8 94.6017 52.061 1
 -7 -6 -8 13.2903 72.5152 4
 -7 -6 -9 89.0615 83.4344 4
 7 6 9 174.309 112.195 1
 -7 -6 -10 2321.23 499.907 4
 -7 -6 -11 248.507 155.763 4
 7 -6 11 325.569 169.965 1
 -7 -6 -12 346.936 224.987 4
 7 -6 12 145.149 125.871 1
 -7 -6 -13 -114.79 130.755 4
 7 -6 13 -157.36 126.775 1
 -7 -6 -14 128.122 141.048 4
 7 -7 -17 1968.29 492.061 3
 7 7 -17 1667.79 445.999 2
 7 7 -16 684.312 261.775 2
 7 7 -15 1688.82 405.477 2
 -7 -7 14 166.663 92.218 5
 7 7 -14 336.616 216.106 2
 7 7 -13 65.396 77.8408 2
 -7 -7 13 -26.0467 57.7303 5
 -7 -7 12 298.433 117.914 5
 -7 -7 11 -21.5489 63.9008 5
 -7 -7 10 2146.08 317.195 5
 -7 -7 9 1213.62 245.713 5
 -7 -7 8 555.119 173.519 5
 -7 -7 7 74.6177 70.1386 5
 -7 -7 6 -67.5947 93.5077 5
 -7 -7 5 85.5372 55.8833 5
 -7 -7 4 2980.72 398.891 5
 -7 -7 3 2500.28 380.693 5
 -7 -7 2 7178.69 636.027 5
 -7 -7 1 1092.06 258.617 5
 -7 -7 1 822.68 215.215 4
 -7 -7 0 12736.7 856.289 5
 -7 -7 0 13175.2 886.882 4
 -7 -7 -1 8380 696.557 5
 7 7 1 8704.43 598.803 1
 -7 -7 -1 7830.08 722.637 4
 -7 -7 -2 2249.27 399.324 4
 7 7 2 2535.78 338.478 1
 -7 -7 -2 2621.37 397.579 5
 -7 -7 -3 1004.52 286.947 4
 -7 -7 -3 810.119 222.28 5
 7 7 3 692.816 172.564 1
 7 7 4 438.911 160.773 1
 -7 -7 -4 315.509 147.258 4
 -7 -7 -4 56.9227 60.291 5
 -7 -7 -5 19424.2 1091.72 5
 7 7 5 21452.6 1096.71 1
 -7 -7 -5 20949.4 1333.29 4
 -7 -7 -6 3937.85 602.972 4
 -7 -7 -6 3820.01 484.263 5
 7 7 6 3518.6 470.347 1
 -7 -7 -7 932.91 285.099 4
 -7 -7 -7 981.222 251.306 5
 -7 -7 -8 -67.6799 157.04 4
 -7 -7 -8 -169.418 105.376 5
 -7 -7 -9 3083.62 576.388 4
 -7 -7 -10 -129.614 131.203 4
 -7 -7 -11 126.536 166.791 4
 -7 -7 -12 685.149 303.237 4
 7 -7 12 414.646 204.99 1
 -7 -7 -13 56.7015 108.744 4
 7 -7 13 382.044 195.572 1
 7 -8 -17 72.6411 193.832 3
 7 -8 -16 87.7923 134.619 3
 7 8 -16 10.5812 145.118 2
 7 8 -15 127.705 105.9 2
 7 8 -14 402.027 187.859 2
 7 8 -13 664.962 247.83 2
 -7 -8 13 903.608 202.818 5
 -7 -8 12 16.3887 57.6392 5
 7 8 -12 176.545 152.681 2
 -7 -8 11 950.802 219.851 5
 -7 -8 10 3983.42 451.662 5
 -7 -8 9 4184.52 464.744 5
 -7 -8 8 10503.1 750.705 5
 -7 -8 7 1450.21 285.278 5
 -7 -8 6 6285.34 591.485 5
 -7 -8 5 29.6604 66.5793 5
 -7 -8 4 731.774 202.374 5
 -7 -8 3 6332.05 626.793 5
 -7 -8 2 6226.49 618.029 5
 -7 -8 1 1049.1 249.93 5
 -7 -8 1 948.282 239.549 4
 -7 -8 0 -47.1237 69.4908 4
 -7 -8 0 148.323 113.221 5
 -7 -8 -1 10765.8 830.833 5
 -7 -8 -1 10768.3 853.729 4
 -7 -8 -2 3.13103 85.8635 4
 -7 -8 -2 -13.8968 60.0892 5
 -7 -8 -3 2985.83 477.724 4
 -7 -8 -3 2981.28 442.7 5
 -7 -8 -4 386.513 179.375 4
 -7 -8 -4 464.749 164.17 5
 -7 -8 -5 741.419 265.557 4
 -7 -8 -5 474.487 175.45 5
 -7 -8 -6 1640.25 394.688 4
 -7 -8 -6 2150.52 378.62 5
 -7 -8 -7 687.648 265.557 4
 -7 -8 -7 702.671 219.17 5
 -7 -8 -8 59.9671 78.0116 4
 -7 -8 -8 137.648 107.83 5
 -7 -8 -9 181.143 77.6498 4
 -7 -8 -10 2170.3 512.287 4
 -7 -8 -11 427.151 219.064 4
 -7 -8 -12 953.456 373.255 4
 7 -8 13 -134.515 119.882 1
 7 -9 -16 38.4453 99.2921 3
 7 9 -16 -23.0561 74.5997 2
 7 9 -15 237.408 112.246 2
 7 9 -14 497.658 211.602 2
 -7 -9 13 39.2969 61.9954 5
 7 9 -13 308.01 199.725 2
 7 9 -12 180.726 111.817 2
 -7 -9 12 122.086 80.6305 5
 -7 -9 11 285.855 119.632 5
 -7 -9 10 812.48 215.284 5
 -7 -9 9 4309.2 496.084 5
 -7 -9 8 13530.5 890.937 5
 -7 -9 7 3783.78 477.141 5
 -7 -9 6 3771.32 482.933 5
 -7 -9 5 445.553 182.701 5
 -7 -9 4 8496.26 736.074 5
 -7 -9 3 425.081 165.525 5
 -7 -9 2 -49.789 111.181 5
 -7 -9 1 -30.957 110.717 5
 -7 -9 1 1.13753 57.3849 4
 -7 -9 0 1183.31 291.416 4
 -7 -9 0 1246.15 287.424 5
 -7 -9 -1 1205.16 302.181 4
 -7 -9 -1 1117.8 275.265 5
 -7 -9 -2 6053.22 647.703 5
 -7 -9 -2 5350.99 649.079 4
 -7 -9 -3 -74.4717 72.421 4
 -7 -9 -3 -45.9936 114.909 5
 -7 -9 -4 233.15 169.611 4
 -7 -9 -4 6.91569 111.684 5
 -7 -9 -5 180.658 91.3296 4
 -7 -9 -5 -55.0462 115.583 5
 -7 -9 -6 53.5677 137.903 4
 -7 -9 -6 145.688 90.1709 5
 -7 -9 -7 -47.8659 95.8375 4
 -7 -9 -7 -52.9479 56.8801 5
 -7 -9 -8 1685.67 442.237 4
 -7 -9 -8 1978.97 382.402 5
 -7 -9 -9 1084.38 357.005 4
 -7 -9 -10 883.311 328.062 4
 -7 -9 -11 213.18 167.41 4
 -7 -9 -12 688.045 326.743 4
 7 -10 -16 258.148 219.046 3
 7 10 -16 503.262 257.427 2
 7 -10 -15 335.543 196.269 3
 7 10 -15 153.51 56.2231 2
 7 10 -14 -4.32614 127.751 2
 -7 -10 13 3.76525 37.6236 5
 7 10 -13 -120.945 135.899 2
 -7 -10 12 1338.7 270.231 5
 7 10 -12 860.291 275.125 2
 7 10 -11 91.5167 108.967 2
 -7 -10 11 150.98 110.497 5
 -7 -10 10 15.6056 65.5849 5
 -7 -10 9 230.653 143.493 5
 -7 -10 8 2209.09 376.574 5
 -7 -10 7 3168.01 453.384 5
 -7 -10 6 2305.25 391.282 5
 -7 -10 5 10830.7 863.114 5
 -7 -10 4 1333.98 307.761 5
 -7 -10 3 -4.5291 68.7441 5
 -7 -10 2 103.562 76.3107 5
 -7 -10 1 6333.87 683.015 5
 -7 -10 1 4886.54 564.447 4
 -7 -10 0 4816.97 601.739 5
 -7 -10 0 3429.06 493.138 4
 -7 -10 -1 1199.31 300.324 4
 -7 -10 -1 1086.04 281.868 5
 -7 -10 -2 3837.42 553.034 4
 -7 -10 -2 2817.77 470.413 5
 -7 -10 -3 1409.82 357.012 4
 -7 -10 -3 1254.51 314.146 5
 -7 -10 -4 4243.1 576.976 5
 -7 -10 -4 5060.75 693.347 4
 -7 -10 -5 -104.157 92.8222 4
 -7 -10 -5 -40.0409 80.6861 5
 -7 -10 -6 85.8776 112.201 4
 -7 -10 -6 434.359 176.774 5
 -7 -10 -7 3069.44 578.838 4
 -7 -10 -7 2097.14 413.815 5
 -7 -10 -8 564.821 251.598 4
 -7 -10 -8 272.456 148.921 5
 -7 -10 -9 12.4671 135.529 4
 -7 -10 -10 -262.511 192.185 4
 -7 -10 -11 1701.66 492.085 4
 7 -11 -15 535.686 272.035 3
 7 11 -15 38.4539 88.8836 2
 7 11 -14 439.355 230.771 2
 -7 -11 13 79.1732 56.1037 5
 7 11 -13 385.725 228.579 2
 -7 -11 12 275.413 142.295 5
 7 11 -12 100.423 88.2373 2
 7 11 -11 -181.392 159.033 2
 -7 -11 11 -11.9601 75.0874 5
 7 11 -10 51.6305 45.3217 2
 -7 -11 10 -17.2679 64.5667 5
 -7 -11 9 722.876 218.618 5
 -7 -11 8 2345.05 399.446 5
 -7 -11 7 3492.45 507.132 5
 -7 -11 6 1310.12 302.4 5
 -7 -11 5 98.1602 81.7084 5
 -7 -11 4 1126.4 293.259 5
 -7 -11 3 165.802 116.454 5
 -7 -11 2 1543 345.324 5
 -7 -11 2 1218.87 285.6 4
 -7 -11 1 85.6178 101.899 4
 -7 -11 1 355.177 176.377 5
 -7 -11 0 10181.4 906.311 5
 -7 -11 0 9406.24 833.363 4
 -7 -11 -1 3167.04 512.214 4
 -7 -11 -1 2210.85 416.702 5
 -7 -11 -2 400.955 182.59 4
 -7 -11 -2 645.889 238.695 5
 -7 -11 -3 566.679 259.377 4
 -7 -11 -3 386.58 172.189 5
 -7 -11 -4 3474.97 591.641 4
 -7 -11 -4 3113.81 517.985 5
 -7 -11 -5 387.037 207.71 4
 -7 -11 -5 47.6316 97.0238 5
 -7 -11 -6 846.099 301.99 4
 -7 -11 -6 448.472 196.921 5
 -7 -11 -7 275.215 174.38 4
 -7 -11 -7 -288.933 166.949 5
 -7 -11 -8 11.5903 118.236 5
 -7 -11 -8 371.38 232.472 4
 -7 -11 -9 -45.6969 79.8037 4
 -7 -11 -10 1239.28 408.552 4
 7 12 -15 639.062 285.432 2
 7 -12 -14 2.33227 103.182 3
 7 12 -14 -175.037 197.107 2
 7 12 -13 802.721 290.502 2
 -7 -12 12 278.644 130.447 5
 7 12 -12 230.599 147.091 2
 -7 -12 11 854.928 241.664 5
 7 12 -11 486.469 201.357 2
 -7 -12 10 36.9893 45.5286 5
 7 12 -10 73.3288 57.9502 2
 7 12 -9 2549.31 425.295 2
 -7 -12 9 2160.08 397.821 5
 -7 -12 8 1825.29 368.576 5
 -7 -12 7 310.017 171.062 5
 -7 -12 6 834.52 256.664 5
 -7 -12 5 -29.6996 105.798 5
 -7 -12 4 872.111 278.738 5
 -7 -12 3 1120.8 309.286 5
 -7 -12 2 191.148 117.515 5
 -7 -12 2 238.337 132.535 4
 -7 -12 1 2083.36 380.032 4
 -7 -12 1 1869.02 388.761 5
 -7 -12 0 635.821 214.402 4
 -7 -12 0 746.177 274.119 5
 -7 -12 -1 282.758 158.031 4
 -7 -12 -1 -15.7937 145.513 5
 -7 -12 -2 415.404 206.501 4
 -7 -12 -2 282.975 156.016 5
 -7 -12 -3 288.454 177.961 4
 -7 -12 -3 312.275 182.608 5
 -7 -12 -4 86.7097 121.824 4
 -7 -12 -4 148.932 73.3575 5
 -7 -12 -5 255.307 180.361 4
 -7 -12 -5 -7.014 85.0992 5
 -7 -12 -6 443.292 206.486 4
 -7 -12 -6 247.447 160.112 5
 -7 -12 -7 146.114 70.3846 4
 -7 -12 -7 1.51144 89.3779 5
 -7 -12 -8 93.2877 117.377 4
 -7 -12 -8 108.768 52.7665 5
 -7 -12 -9 3.84526 67.3089 4
 -7 -12 -9 -58.0218 85.6625 5
 -7 -12 -10 231.713 183.952 4
 7 -13 -14 59.3908 163.822 3
 7 13 -14 -39.6792 83.9425 2
 7 -13 -13 617.772 290.396 3
 7 13 -13 811.817 297.184 2
 -7 -13 12 57.3127 91.2443 5
 7 13 -12 44.6537 76.5691 2
 -7 -13 11 372.878 162.831 5
 7 13 -11 746.529 261.603 2
 -7 -13 10 704.371 227.19 5
 7 13 -10 730.261 251.117 2
 -7 -13 9 -173.554 119.589 5
 7 13 -9 -54.6251 85.3789 2
 7 13 -8 291.587 146.47 2
 -7 -13 8 293.958 153.984 5
 -7 -13 7 264.437 149.799 5
 -7 -13 6 1260.87 311.166 5
 -7 -13 5 -25.2525 52.7863 5
 -7 -13 4 195.145 218.614 5
 -7 -13 3 156.258 118.769 5
 -7 -13 2 431.054 201.705 5
 -7 -13 2 388.173 160.634 4
 -7 -13 1 150.052 137.716 4
 -7 -13 1 -123.117 192.944 5
 -7 -13 0 91.9696 119.079 5
 -7 -13 0 -193.433 133.563 4
 -7 -13 -1 1423.15 356.357 4
 -7 -13 -1 888.984 303.158 5
 -7 -13 -2 157.976 139.355 4
 -7 -13 -2 291.239 178.846 5
 -7 -13 -3 320.392 195.876 4
 -7 -13 -3 716.275 284.763 5
 -7 -13 -4 200.173 129.315 4
 -7 -13 -4 262.845 171.177 5
 -7 -13 -5 14.2 109.16 4
 -7 -13 -5 8.54866 60.1292 5
 -7 -13 -6 620.105 274.349 4
 -7 -13 -6 678.583 265.78 5
 -7 -13 -7 -19.6127 89.5055 4
 -7 -13 -7 5.56949 90.258 5
 -7 -13 -8 109.626 165.612 4
 -7 -13 -8 210.362 143.42 5
 -7 -13 -9 194.138 164.595 4
 -7 -13 -9 123.118 128.38 5
 7 14 -14 286.599 196.674 2
 7 -14 -13 195.233 198.006 3
 7 14 -13 106.086 112.721 2
 -7 -14 12 -204.499 124.924 5
 7 -14 -12 59.3169 94.0047 3
 7 14 -12 4.72443 92.4867 2
 -7 -14 11 37.6949 70.0212 5
 7 14 -11 21.6964 78.1616 2
 -7 -14 10 43.7419 73.5462 5
 7 14 -10 309.497 168.104 2
 -7 -14 9 -85.4278 131.226 5
 7 14 -9 141.031 122.788 2
 7 14 -8 531.704 195.767 2
 -7 -14 8 566.247 219.794 5
 7 14 -7 1235.19 297.723 2
 -7 -14 7 1587.56 382.399 5
 -7 -14 6 2003.36 424.638 5
 -7 -14 5 1173.7 330.461 5
 -7 -14 4 -45.7997 103.107 5
 -7 -14 3 618.131 254.026 5
 -7 -14 2 547.984 233.442 5
 -7 -14 2 242.023 139.265 4
 -7 -14 1 411.928 204.066 4
 -7 -14 1 827.943 283.973 5
 -7 -14 0 396.022 191.723 4
 -7 -14 0 240.074 118.723 5
 -7 -14 -1 1551.59 380.182 4
 -7 -14 -1 1761.38 418.974 5
 -7 -14 -2 1890.14 426.488 4
 -7 -14 -2 1177.39 361.837 5
 -7 -14 -3 1806.54 431.468 4
 -7 -14 -3 1722.92 417.345 5
 -7 -14 -4 93.1428 148.865 4
 -7 -14 -4 183.181 171.848 5
 -7 -14 -5 440.214 247.673 4
 -7 -14 -5 312.218 197.754 5
 -7 -14 -6 181.268 123.263 4
 -7 -14 -6 391.016 198.96 5
 -7 -14 -7 453.477 247.144 4
 -7 -14 -7 659.891 292.428 5
 -7 -14 -8 103.78 97.5452 4
 -7 -14 -8 41.9118 84.0966 5
 -7 -14 -9 121.567 150.509 5
 7 15 -13 -154.622 142.751 2
 7 -15 -12 -61.4369 172.17 3
 7 15 -12 -8.59432 53.9727 2
 -7 -15 11 211.875 135.387 5
 7 -15 -11 214.796 162.237 3
 7 15 -11 30.1011 91.4515 2
 -7 -15 10 184.285 140.226 5
 7 -15 -10 327.784 204.619 3
 7 15 -10 184.445 122.827 2
 -7 -15 9 -74.3101 139.921 5
 7 15 -9 112.88 104.302 2
 -7 -15 8 473.778 219.445 5
 7 15 -8 265.897 136.013 2
 -7 -15 7 228.472 107.994 5
 7 15 -7 591.847 218.1 2
 7 15 -6 10.8956 58.4663 2
 -7 -15 6 -270.531 169.04 5
 7 15 -5 365.514 147.626 2
 -7 -15 5 201.871 142.923 5
 -7 -15 4 2210.6 466.959 5
 -7 -15 3 -44.9909 67.5993 5
 -7 -15 2 -108.862 154.141 5
 -7 -15 2 23.965 60.7717 4
 -7 -15 1 305.427 194.751 4
 -7 -15 1 -110.078 132.653 5
 -7 -15 0 992.338 301.449 4
 -7 -15 0 715.342 254.797 5
 -7 -15 -1 -27.2696 57.7702 4
 -7 -15 -1 -177.033 234.495 5
 -7 -15 -2 1198.05 347.456 4
 -7 -15 -2 1397.41 401.325 5
 -7 -15 -3 -94.9577 130.719 4
 -7 -15 -3 -352.321 207.713 5
 -7 -15 -4 609.091 254.159 4
 -7 -15 -4 784.069 288.609 5
 -7 -15 -5 120.697 162.426 4
 -7 -15 -5 -5.48218 84.5922 5
 -7 -15 -6 961.019 351.577 4
 -7 -15 -6 1029.67 356.289 5
 -7 -15 -7 -292.115 207.304 4
 -7 -15 -7 -375.816 216.391 5
 -7 -15 -8 426.253 267.262 5
 -7 -15 -9 309.358 205.084 5
 7 16 -13 94.4693 100.687 2
 7 16 -12 229.376 162.015 2
 -7 -16 11 -131.648 125.006 5
 7 -16 -11 52.0365 92.9198 3
 -7 -16 10 -9.17229 60.683 5
 7 -16 -10 167.855 158.772 3
 7 16 -10 53.0499 86.549 2
 -7 -16 9 0.88132 46.003 5
 7 -16 -9 54.5024 96.7517 3
 7 16 -9 181.998 130.296 2
 -7 -16 8 724.729 270.719 5
 7 -16 -8 1104.39 343.81 3
 7 16 -8 613.374 223.924 2
 -7 -16 7 971.91 307.771 5
 7 16 -7 937.641 263.033 2
 -7 -16 6 -36.5713 82.7767 5
 -7 -16 5 5979.52 794.866 5
 -7 -16 4 618.44 272.006 5
 -7 -16 3 121.959 130.261 5
 -7 -16 2 1756.4 440.208 5
 -7 -16 2 1132.37 307.279 4
 -7 -16 1 197.634 133.694 4
 -7 -16 1 11.5838 88.3291 5
 -7 -16 0 130.674 106.774 4
 -7 -16 0 -150.357 195.233 5
 -7 -16 -1 -47.5059 80.1826 4
 -7 -16 -1 -38.3167 127.574 5
 -7 -16 -2 347.509 176.56 4
 -7 -16 -2 886.725 319.141 5
 -7 -16 -3 27.69 96.2196 4
 -7 -16 -3 -21.8823 122.663 5
 -7 -16 -4 -261.626 190.778 5
 -7 -16 -4 84.2908 136.904 4
 -7 -16 -5 131.238 119.623 4
 -7 -16 -5 3.52483 92.9355 5
 -7 -16 -6 92.5032 130.139 4
 -7 -16 -6 53.7625 96.4639 5
 -7 -16 -7 827.683 337.34 5
 -7 -16 -8 471.593 256.86 5
 7 17 -12 212.531 167.377 2
 7 17 -11 -0.33409 74.8247 2
 -7 -17 10 -158.386 133.255 5
 7 -17 -10 303.71 217.171 3
 7 17 -10 476.117 227.669 2
 -7 -17 9 878.804 291.686 5
 7 -17 -9 1066.55 354.007 3
 7 17 -9 733.842 261.585 2
 -7 -17 8 814.244 296.494 5
 7 -17 -8 920.207 326.025 3
 -7 -17 7 114.248 86.4597 5
 7 -17 -7 -291.967 178.396 3
 -7 -17 6 881.326 304.56 5
 7 -17 -6 839.246 287.493 3
 7 -17 -5 145.516 148.346 3
 -7 -17 5 456.387 298.102 5
 7 -17 -4 265.071 151.831 3
 -7 -17 4 158.832 153.361 5
 -7 -17 3 118.009 85.494 5
 -7 -17 2 1045.49 341.227 5
 -7 -17 2 874.03 274.919 4
 -7 -17 1 89.8012 113.958 4
 -7 -17 1 26.6719 104.368 5
 -7 -17 0 372.23 199.26 4
 -7 -17 0 279.508 173.504 5
 -7 -17 -1 603.692 255.431 4
 -7 -17 -1 849.242 337.546 5
 -7 -17 -2 322.47 192.18 4
 -7 -17 -2 332.998 157.167 5
 -7 -17 -3 762.539 304.463 4
 -7 -17 -3 661.05 300.632 5
 -7 -17 -4 78.0488 169.833 4
 -7 -17 -4 138.131 141.95 5
 -7 -17 -5 1113.61 394.464 4
 -7 -17 -5 493.152 260.102 5
 -7 -17 -6 301.102 205.608 5
 -7 -18 10 1122.2 346.482 5
 -7 -18 9 336.301 190.965 5
 7 -18 -9 598.455 282.908 3
 7 -18 -8 189.266 172.58 3
 -7 -18 8 451.785 233.696 5
 7 -18 -7 367.468 204.383 3
 -7 -18 7 692.086 277.195 5
 7 -18 -6 817.953 293.471 3
 -7 -18 6 1152.5 371.923 5
 7 -18 -5 26.7932 68.4544 3
 -7 -18 5 149.771 143.305 5
 -7 -18 4 35.9049 142.749 5
 -7 -18 3 130.354 207.638 5
 -7 -18 2 -60.9178 111.053 5
 -7 -18 1 -44.1675 124.996 5
 -7 -18 1 -36.3995 60.6341 4
 -7 -18 0 -87.6861 106.547 4
 -7 -18 0 47.2845 75.6447 5
 -7 -18 -1 40.0801 117.935 4
 -7 -18 -1 91.6577 71.1259 5
 -7 -18 -2 2223.78 514.676 4
 -7 -18 -2 1743.35 486.557 5
 -7 -18 -3 64.1733 100.965 4
 -7 -18 -3 108.324 141.046 5
 -7 -18 -4 -196.124 173.963 4
 -7 -18 -4 141.959 144.664 5
 7 -19 -9 -247.356 185.406 3
 -7 -19 9 -86.6189 111.214 5
 7 -19 -8 384.106 219.01 3
 -7 -19 8 130.236 110.454 5
 7 -19 -7 315.547 195.962 3
 -7 -19 7 255.339 181.787 5
 7 -19 -6 433.949 223.509 3
 -7 -19 6 -6.21939 65.3284 5
 -7 -19 5 671.97 298.252 5
 -7 -19 4 61.9154 90.1016 5
 -7 -19 3 792.792 338.823 5
 -7 -19 2 46.859 164.482 5
 -7 -19 1 324.013 236.519 5
 -7 -19 0 191.924 149.273 4
 -7 -19 0 -40.903 102.791 5
 -7 -19 -1 549.473 254.241 4
 -7 -19 -2 267.593 189.307 4
 -7 -19 -3 241.298 214.398 4
 -7 -20 -1 0.75895 58.2006 4
 -7 -20 -2 -129.328 142.102 4
 8 0 -19 135.015 157.026 2
 8 0 -18 -134.648 124.059 2
 8 0 -17 12.3931 68.7615 2
 8 0 -16 350.369 186.82 2
 8 0 -15 18.276 67.3034 2
 -8 0 15 -28.4203 32.5378 5
 -8 0 14 15.6831 58.3872 5
 -8 0 13 90.3459 67.1922 5
 -8 0 12 434.069 138.893 5
 -8 0 11 -44.2243 54.8971 5
 -8 0 10 -4.77603 48.5607 5
 -8 0 9 8.06888 42.7479 5
 -8 0 8 349.525 118.985 5
 -8 0 7 -0.94396 40.9186 5
 -8 0 6 10277.4 587.34 5
 -8 0 5 51.2876 74.8398 5
 -8 0 4 24424.1 881.963 5
 -8 0 3 46.2358 26.6489 5
 -8 0 2 12952.3 615.947 5
 -8 0 1 10.015 49.3378 5
 -8 0 0 55785.8 1247.65 5
 -8 0 -1 5.60678 31.9368 5
 -8 0 -2 1418.33 192.469 5
 -8 0 -3 -41.9396 54.8395 5
 -8 0 -4 7824.36 427.093 5
 8 0 5 -16.7375 84.5156 1
 -8 0 -5 -72.4911 41.5708 5
 8 0 6 1534.42 324.94 1
 -8 0 -6 1567.53 325.916 4
 8 0 7 10.338 64.2695 1
 -8 0 -7 -104.736 85.6749 4
 8 0 8 1207.03 302.155 1
 -8 0 -8 1957.15 393.674 4
 8 0 9 124.193 108.521 1
 -8 0 -9 272.895 167.218 4
 8 0 10 419.614 175.975 1
 -8 0 -10 10.4133 66.0053 4
 8 0 11 -2.12295 55.022 1
 -8 0 -11 -83.6225 90.8781 4
 8 0 12 526.667 223.224 1
 8 0 13 -100.936 105.68 1
 8 -1 -19 688.763 284.029 2
 8 -1 -18 42.8163 97.1211 2
 8 1 -18 26.1258 51.3066 2
 8 1 -17 43.1902 105.404 2
 8 -1 -17 54.4794 92.2332 2
 8 1 -16 21.7497 107.499 2
 8 -1 -16 113.323 65.4768 2
 -8 -1 16 156.961 92.4817 5
 8 1 -15 363.623 166.232 2
 -8 -1 15 152.461 90.2968 5
 -8 1 14 -97.1565 93.0697 5
 -8 -1 14 -13.7703 40.355 5
 -8 1 13 -3.78264 55.51 5
 -8 -1 13 190.239 102.263 5
 -8 1 12 691.699 180.492 5
 -8 -1 12 585.048 178.085 5
 -8 -1 11 2120.11 295.009 5
 -8 1 11 1929.65 290.229 5
 -8 1 10 485.292 134.45 5
 -8 -1 10 520.22 142.134 5
 -8 1 9 782.561 174.654 5
 -8 -1 9 815.878 179.2 5
 -8 1 8 96.6806 70.2574 5
 -8 -1 8 282.033 104.359 5
 -8 1 7 3949.67 367.798 5
 -8 -1 7 3851.63 371.588 5
 -8 1 6 3388.03 335.554 5
 -8 -1 6 3600.25 352.397 5
 -8 1 5 4176.6 366.684 5
 -8 -1 5 4279.58 381.177 5
 -8 1 4 -17.1354 58.7976 5
 -8 -1 4 -4.19359 80.2772 5
 -8 1 3 768.984 149.88 5
 -8 -1 3 755.124 160.713 5
 -8 1 2 187.601 80.6826 5
 -8 -1 2 242.772 100.614 5
 -8 -1 1 1961.19 253.142 5
 -8 1 1 1289.97 184.016 5
 -8 1 0 5007.46 364.799 5
 -8 -1 0 5082.88 399.503 5
 -8 1 -1 1640.36 204.304 5
 -8 -1 -1 1606.43 220.487 5
 -8 1 -2 9873.16 479.925 5
 -8 -1 -2 9542.94 531.452 5
 -8 1 -3 1327.41 171.542 5
 8 1 3 934.07 213.718 1
 -8 -1 -3 1203.8 185.854 5
 -8 -1 -4 2116.56 243.43 5
 -8 1 -4 1951.65 199.351 5
 8 1 4 1963.76 315.472 1
 -8 1 -5 5164.29 305.098 5
 -8 -1 -5 5070.65 364.864 5
 8 1 5 4867.35 533.642 1
 -8 -1 -5 4771.9 559.125 4
 8 -1 6 906.592 237.93 1
 8 1 6 1001 231.323 1
 -8 -1 -6 1167.82 292.893 4
 -8 -1 -7 2795.88 458.337 4
 8 1 7 2015.56 359.057 1
 8 -1 7 2565.41 413.368 1
 -8 -1 -8 2102.96 407.993 4
 8 1 8 2530.93 419.924 1
 8 -1 8 2637.66 438.109 1
 -8 -1 -9 43.0593 79.5047 4
 8 1 9 52.6089 56.3324 1
 -8 1 -9 243.988 144.054 4
 8 -1 9 31.2601 66.8002 1
 -8 -1 -10 6.88602 73.0971 4
 8 -1 10 -22.118 85.4822 1
 8 1 10 159.996 127.923 1
 -8 1 -10 -36.3594 78.2704 4
 -8 -1 -11 139.023 113.003 4
 8 -1 11 -28.9519 54.0122 1
 8 1 11 -73.1061 85.9462 1
 8 1 12 36.627 78.157 1
 8 -1 12 -143.64 121.594 1
 8 1 13 329.032 208.925 1
 8 -1 13 535.343 226.743 1
 8 -2 -19 319.193 216.429 3
 8 -2 -19 148.044 130.523 2
 8 -2 -18 119.113 105.651 2
 8 2 -18 222.509 152.337 2
 8 2 -17 1042.83 327.443 2
 8 -2 -17 767.298 261.962 2
 8 -2 -16 186.754 127.012 2
 -8 -2 16 245.184 115.93 5
 8 2 -16 123.032 80.5007 2
 8 2 -15 126.902 107.765 2
 -8 -2 15 170.385 90.2792 5
 -8 -2 14 1741.37 281.497 5
 -8 -2 13 1644.08 268.427 5
 -8 2 13 2197.43 332.505 5
 -8 -2 12 4336.58 428.977 5
 -8 2 12 4108.95 449.757 5
 -8 2 11 223.35 71.5759 5
 -8 -2 11 363.39 118.532 5
 -8 2 10 745.861 178.981 5
 -8 -2 10 887.992 184.984 5
 -8 2 9 3001.85 344.269 5
 -8 -2 9 3555.83 368.004 5
 -8 2 8 887.785 187.446 5
 -8 -2 8 1154.4 205.667 5
 -8 2 7 1010.97 253.865 5
 -8 -2 7 809.144 181.999 5
 -8 2 6 31.8847 43.8213 5
 -8 -2 6 60.9653 52.7743 5
 -8 2 5 638.216 137.684 5
 -8 -2 5 667.149 156.393 5
 -8 2 4 74.6924 71.224 5
 -8 -2 4 155.631 66.4102 5
 -8 2 3 51.2509 43.6647 5
 -8 -2 3 -19.1405 35.9736 5
 -8 2 2 6647.71 426.796 5
 -8 -2 2 5684.67 455.306 5
 -8 -2 1 2586.31 305.036 5
 -8 2 1 2785.81 268.857 5
 -8 2 0 2293.45 237.484 5
 -8 -2 0 2454.78 294.023 5
 -8 -2 -1 2488.91 290.702 5
 8 2 1 2924.99 357.054 1
 -8 2 -1 2943.92 261.87 5
 -8 2 -2 729.911 126.229 5
 -8 -2 -2 910.622 179.045 5
 8 2 2 961.162 206.418 1
 -8 2 -3 1590.63 181.427 5
 -8 -2 -3 1424.13 223.704 5
 8 2 3 1044.39 231.735 1
 -8 2 -4 3210.69 243.535 5
 -8 -2 -4 2629.47 296.531 5
 8 2 4 2655.78 383.071 1
 -8 -2 -4 2860.12 436.524 4
 -8 -2 -5 190.14 107.574 4
 -8 2 -5 111.102 40.7775 5
 -8 -2 -5 185.703 78.3421 5
 8 2 5 -16.8846 83.9641 1
 -8 -2 -6 -2.26586 118.527 4
 8 2 6 80.6453 49.2446 1
 -8 -2 -6 140.993 74.1814 5
 -8 -2 -7 3293.26 510.117 4
 8 2 7 3999 527.127 1
 8 -2 8 8181.17 764.932 1
 8 2 8 8466.33 776.101 1
 -8 -2 -8 7737.55 800.531 4
 -8 -2 -9 39.2047 103.899 4
 8 2 9 -87.4428 111.419 1
 8 -2 9 -12.3706 55.8842 1
 -8 -2 -10 460.772 207.922 4
 8 2 10 203.956 127.597 1
 8 -2 10 251.121 156.039 1
 -8 -2 -11 387.953 230.182 4
 8 2 11 536.429 231.157 1
 8 -2 11 189.642 134.554 1
 -8 -2 -12 486.439 215.793 4
 8 -2 12 785.812 262.182 1
 8 2 12 877.138 281.804 1
 8 2 13 63.3826 97.632 1
 8 -2 13 190.18 131.716 1
 8 -3 -19 50.3814 123.552 3
 8 -3 -19 333.379 203.836 2
 8 -3 -18 184.007 156.133 2
 8 3 -18 312.329 199.909 2
 8 3 -17 553.307 245 2
 8 -3 -17 784.869 256.969 2
 8 -3 -16 667.356 212.724 2
 8 3 -16 702.194 252.435 2
 8 3 -15 -10.9201 68.8975 2
 -8 -3 15 -5.03806 30.7282 5
 -8 -3 14 2741.58 355.92 5
 -8 -3 13 768.678 189.349 5
 -8 -3 12 1004.52 200.365 5
 -8 3 12 1335.93 254.554 5
 -8 -3 11 2098.67 293.292 5
 -8 3 11 2041.42 314.658 5
 -8 3 10 920.358 209.186 5
 -8 -3 10 1082.59 204.689 5
 -8 -3 9 1449.3 237.571 5
 -8 3 9 1321.33 239.588 5
 -8 3 8 39.5035 77.5142 5
 -8 -3 8 -4.75865 45.6944 5
 -8 3 7 181.06 74.6231 5
 -8 -3 7 364.409 127.648 5
 8 3 -7 114.215 36.343 1
 -8 3 6 2027.74 273.568 5
 -8 -3 6 2324.85 301.066 5
 8 3 -6 2404.99 198.275 1
 -8 3 5 -26.3159 34.57 5
 8 3 -5 -11.3604 28.7583 1
 -8 3 4 4538.54 377.436 5
 -8 -3 4 4353.14 417.275 5
 8 3 -4 4313.83 324.101 1
 -8 -3 3 2398.12 323.637 5
 8 3 -3 1844.22 231.41 1
 -8 3 3 2166.91 250.084 5
 -8 3 2 703.024 139.402 5
 -8 -3 2 923.115 195.089 5
 8 3 -2 570.332 135.146 1
 -8 3 1 2719.13 267.355 5
 -8 -3 1 3009.66 343.319 5
 -8 3 0 481.867 104.17 5
 -8 -3 0 554.471 155.771 5
 -8 -3 -1 9469.88 612.841 5
 8 3 1 8529.62 605.811 1
 -8 3 -1 8755.87 454.662 5
 -8 3 -2 869.971 138.158 5
 -8 -3 -2 758.459 177.39 5
 8 3 2 625.78 158.768 1
 8 3 3 233.046 112.807 1
 -8 3 -3 377.924 89.0949 5
 -8 -3 -3 345.981 133.708 5
 -8 -3 -4 97.9848 91.997 4
 -8 3 -4 -21.8097 31.623 5
 8 3 4 -13.9293 77.9946 1
 -8 -3 -4 -29.711 57.0536 5
 -8 -3 -5 8887.72 581.375 5
 8 3 5 8655.56 715.901 1
 -8 -3 -5 9444.82 831.043 4
 -8 -3 -6 5891.43 469.722 5
 8 3 6 5751.97 601.477 1
 -8 -3 -6 4964.87 632.585 4
 -8 -3 -7 -39.5916 67.0147 4
 8 3 7 88.2834 76.3627 1
 -8 -3 -8 -74.4579 102.579 4
 8 3 8 35.4892 73.6677 1
 8 3 9 599.214 230.921 1
 -8 -3 -9 634.485 251.36 4
 8 -3 9 329.77 146.752 1
 -8 -3 -10 1988.26 435.465 4
 8 3 10 1722.36 371.941 1
 8 -3 10 2085.6 407.993 1
 -8 -3 -11 -21.1883 57.6842 4
 8 3 11 127.945 138.364 1
 8 -3 11 81.6229 94.3399 1
 -8 -3 -12 -148.702 137.631 4
 8 -3 12 -119.331 114.563 1
 -8 -3 -13 430.926 234.642 4
 8 -3 13 400.907 201.122 1
 8 3 13 532.055 237.285 1
 8 -4 -19 86.3461 115.897 3
 8 4 -18 429.529 222.077 2
 8 -4 -17 284.088 159.188 2
 8 4 -17 -30.4874 81.025 2
 8 4 -16 324.687 168.91 2
 8 -4 -16 148.189 93.7917 2
 8 -4 -15 251.938 130.868 2
 -8 -4 15 164.271 93.3782 5
 8 4 -15 4.8168 71.5248 2
 -8 -4 14 -8.30495 49.4162 5
 -8 -4 13 8.18478 39.2182 5
 -8 -4 12 569.959 156.441 5
 -8 -4 11 3806.59 404.776 5
 -8 4 10 1069.36 223.921 5
 -8 -4 10 1290.84 234.614 5
 -8 4 9 658.707 164.139 5
 -8 -4 9 781.782 191.407 5
 -8 4 8 511.3 157.065 5
 -8 -4 8 801.646 192.618 5
 -8 4 7 3404.48 372.855 5
 -8 -4 7 3239.15 372.265 5
 8 4 -7 3468.92 177.019 1
 -8 4 6 2368.76 301.526 5
 -8 -4 6 2708.1 345.21 5
 8 4 -6 2991.66 213.898 1
 -8 4 5 12897.2 682.212 5
 -8 -4 5 13613.7 765.785 5
 8 4 -5 12612.5 505.067 1
 -8 4 4 2041.22 264.576 5
 -8 -4 4 2663.52 346.203 5
 8 4 -4 2136.5 230.49 1
 -8 4 3 8473.15 513.691 5
 -8 -4 3 9560.49 649.972 5
 8 4 -3 7936.03 474.597 1
 -8 4 2 1383.6 205.573 5
 -8 -4 2 1129.01 217.168 5
 -8 4 1 587.878 127.065 5
 -8 -4 1 959.526 193.381 5
 -8 -4 0 544.655 169.421 5
 -8 4 0 592.332 124.306 5
 -8 4 -1 422.236 105.508 5
 8 4 1 249.387 99.7356 1
 -8 -4 -1 474.803 162.899 5
 -8 4 -2 1464.68 189.042 5
 8 4 2 977 214.091 1
 -8 -4 -2 1584.81 259.478 5
 -8 -4 -2 1735.85 336.796 4
 -8 4 -3 3551.07 279.527 5
 -8 -4 -3 3606.29 401.164 5
 8 4 3 4384.31 475.327 1
 -8 -4 -3 4448.95 550.745 4
 -8 -4 -4 2182.1 399.566 4
 -8 -4 -4 1944.9 295.843 5
 8 4 4 2015.53 339.564 1
 -8 -4 -5 -63.1236 73.8696 5
 8 4 5 -81.7556 120.439 1
 -8 -4 -6 3015.48 498.63 4
 -8 -4 -6 2518.87 331.938 5
 8 4 6 3042.55 438.131 1
 8 4 7 1227.61 292.479 1
 -8 -4 -7 401.449 172.126 4
 -8 -4 -8 100.152 64.8646 4
 8 4 8 670.408 223.204 1
 -8 -4 -9 -104.167 165.142 4
 8 4 9 260.148 159.884 1
 -8 -4 -10 155.036 141.677 4
 8 -4 10 84.3862 43.1194 1
 8 4 10 103.335 103.279 1
 8 4 11 611.567 245.004 1
 -8 -4 -11 698.849 290.39 4
 8 -4 11 291.09 174.457 1
 8 4 12 150.265 76.2834 1
 8 -4 12 107.154 91.6716 1
 -8 -4 -13 50.5262 62.0112 4
 8 -4 13 -31.847 71.6818 1
 8 5 -17 83.0418 70.1554 2
 8 5 -16 -29.5266 113.305 2
 8 -5 -16 -114.808 97.463 2
 8 5 -15 156.084 49.9088 2
 -8 -5 15 506.837 155.306 5
 8 -5 -15 493.293 188.59 2
 -8 -5 14 50.3417 47.8143 5
 -8 -5 13 69.5708 66.9867 5
 -8 -5 12 320.246 114.783 5
 -8 -5 11 3902.45 419.23 5
 -8 -5 10 708.747 169.181 5
 -8 -5 9 2654.13 349.464 5
 -8 -5 8 5874.21 519.355 5
 -8 -5 7 232.415 133.982 5
 -8 5 7 -61.6285 93.203 5
 -8 5 6 4653.82 436.293 5
 -8 -5 6 4942.02 482.669 5
 -8 5 5 1612.32 244.437 5
 -8 -5 5 2187.85 322.912 5
 8 5 -5 1943.83 192.506 1
 -8 5 4 1824.34 257.222 5
 8 5 -4 1723.19 203.496 1
 -8 -5 4 1562.8 269.905 5
 -8 5 3 2041.95 263.133 5
 8 5 -3 1814.86 227.129 1
 -8 -5 3 1690.51 282.065 5
 -8 5 2 11239.7 602.521 5
 -8 -5 2 10942.9 728.785 5
 -8 5 1 2131.22 256.111 5
 -8 -5 1 2279.63 332.7 5
 -8 5 0 499.784 119.146 5
 -8 -5 0 478.011 161.917 5
 8 5 0 651.862 163.767 1
 -8 5 -1 320.254 87.9986 5
 -8 -5 -1 131.127 87.2282 5
 8 5 1 180.654 93.2288 1
 -8 -5 -1 275.812 124.972 4
 -8 -5 -2 6429.9 561.26 5
 8 5 2 6172.04 542.919 1
 -8 -5 -2 6127.28 647.697 4
 -8 -5 -3 804.439 257.338 4
 -8 -5 -3 907.715 214.418 5
 8 5 3 834.389 214.604 1
 -8 -5 -4 4333.77 465.12 5
 8 5 4 4343.22 488.82 1
 -8 -5 -4 4114.46 565.985 4
 8 5 5 1852.36 324.167 1
 -8 -5 -5 2148.47 423.177 4
 -8 -5 -5 2506.74 354.324 5
 8 5 6 1481.91 310.945 1
 -8 -5 -6 858.864 277.232 4
 -8 -5 -6 1635.32 284.887 5
 -8 -5 -7 3156.77 393.308 5
 -8 -5 -7 3902.27 601.148 4
 8 5 7 2993.91 453.985 1
 -8 -5 -8 3492.49 583.16 4
 8 5 8 4810.88 581.466 1
 8 5 9 109.165 77.997 1
 -8 -5 -9 130.472 140.755 4
 -8 -5 -10 1107.72 346.133 4
 8 -5 10 851.916 274.674 1
 8 5 10 1095.47 301.63 1
 -8 -5 -11 104.92 128.538 4
 8 -5 11 -110.379 113.6 1
 8 5 12 484.024 222.063 1
 -8 -5 -12 266.731 198.928 4
 8 -5 12 266.45 157.832 1
 8 -5 13 328.14 204.454 1
 -8 -5 -13 69.9172 128.379 4
 8 -6 -18 -274.235 186.54 3
 8 6 -17 541.284 251.714 2
 8 6 -16 845.145 309.786 2
 8 6 -15 -48.5845 124.443 2
 8 -6 -15 126.767 100.876 2
 -8 -6 14 164.331 102.451 5
 8 6 -14 363.079 180.758 2
 -8 -6 13 121.88 88.035 5
 -8 -6 12 968.788 213.926 5
 -8 -6 11 1338.76 254.136 5
 -8 -6 10 268.553 129.055 5
 -8 -6 9 40.2957 42.1453 5
 -8 -6 8 13.0881 65.0794 5
 -8 -6 7 89.1974 54.1257 5
 -8 -6 6 1864.76 316.075 5
 -8 -6 5 -27.5989 55.6888 5
 -8 -6 4 1836.36 310.492 5
 8 6 -4 1964.98 218.601 1
 8 6 -3 3102.18 297.515 1
 -8 -6 3 2738.09 379.567 5
 -8 -6 2 40.95 42.1259 5
 -8 -6 1 2598.31 379.555 5
 8 6 0 442.746 137.434 1
 -8 -6 0 87.1053 101.752 5
 -8 -6 -1 4358.02 488.413 5
 8 6 1 4436.34 442.369 1
 -8 -6 -1 3997.21 529.769 4
 -8 -6 -2 4.75466 104.253 4
 8 6 2 294.01 134.12 1
 -8 -6 -2 189.6 94.8085 5
 -8 -6 -3 3272.14 501.983 4
 -8 -6 -3 4138.46 474.997 5
 8 6 3 3572.03 432.879 1
 -8 -6 -4 596.659 225.487 4
 -8 -6 -4 438.288 150.53 5
 8 6 4 467.91 163.745 1
 -8 -6 -5 4202.42 488.398 5
 8 6 5 4075.58 489.657 1
 -8 -6 -5 4404.8 619.732 4
 -8 -6 -6 410.79 231.483 4
 8 6 6 577.166 178.282 1
 -8 -6 -6 477.894 161.246 5
 -8 -6 -7 2377.85 480.827 4
 -8 -6 -7 2795.42 397.244 5
 8 6 7 3327.54 466.505 1
 -8 -6 -8 764.322 286.356 4
 8 6 8 878.023 248.724 1
 -8 -6 -9 92.9785 58.9379 4
 8 6 9 -65.2128 72.9736 1
 -8 -6 -10 15.7634 53.7815 4
 8 6 10 133.652 131.446 1
 -8 -6 -11 2358.94 533.512 4
 8 -6 11 2083.81 436.356 1
 -8 -6 -12 170.4 160.999 4
 8 -6 12 23.0649 68.2996 1
 -8 -6 -13 183.31 140.171 4
 8 -6 13 304.437 189.465 1
 8 7 -17 71.2498 134.991 2
 8 7 -16 440.637 227.263 2
 8 7 -15 61.4838 56.5629 2
 8 7 -14 57.2402 70.2462 2
 -8 -7 14 58.1595 59.1748 5
 -8 -7 13 244.826 117.788 5
 -8 -7 12 184.344 101.876 5
 -8 -7 11 325.507 121.639 5
 -8 -7 10 1845.68 306.908 5
 -8 -7 9 364.264 136.219 5
 -8 -7 8 1161.43 242.315 5
 -8 -7 7 469.71 156.153 5
 -8 -7 6 3731.54 450.642 5
 -8 -7 5 4451.11 499.117 5
 -8 -7 4 2502.93 377.874 5
 -8 -7 3 267.655 159.802 5
 -8 -7 2 13099.5 881.021 5
 -8 -7 1 -19.5004 70.2707 5
 8 7 -1 29.8962 33.8032 1
 8 7 0 1731.89 269.849 1
 -8 -7 0 1232.72 276.644 5
 -8 -7 0 1843.88 351.645 4
 -8 -7 -1 3954.32 489.711 5
 8 7 1 4781.18 460.193 1
 -8 -7 -1 4707.92 573.857 4
 -8 -7 -2 14331.6 935.287 5
 8 7 2 14172.4 827.809 1
 -8 -7 -2 13779.5 1020.09 4
 -8 -7 -3 1682.91 382.241 4
 -8 -7 -3 1613.05 314.617 5
 8 7 3 2581.91 372.107 1
 -8 -7 -4 2847.55 493.805 4
 8 7 4 3212.04 421.235 1
 -8 -7 -4 2819.19 424.37 5
 -8 -7 -5 1246.56 337.762 4
 8 7 5 1444.12 291.067 1
 -8 -7 -5 789.689 218.473 5
 -8 -7 -6 632.548 263.87 4
 -8 -7 -6 685.19 208.585 5
 8 7 6 345.427 150.554 1
 -8 -7 -7 -10.0664 121.385 4
 8 7 7 -9.17933 43.8574 1
 -8 -7 -7 5.83406 42.1308 5
 -8 -7 -8 83.9672 78.55 4
 8 7 8 266.527 148.025 1
 -8 -7 -9 37.9266 86.6901 4
 -8 -7 -10 1185.27 376.98 4
 -8 -7 -11 -181.055 169.102 4
 -8 -7 -12 80.7026 122.969 4
 8 -7 12 253.728 161.268 1
 8 -7 13 41.0632 71.9383 1
 8 8 -16 40.7258 89.7864 2
 8 8 -15 432.577 225.954 2
 8 8 -14 53.8023 66.4228 2
 -8 -8 14 -123.242 82.2703 5
 8 8 -13 1810.41 386.994 2
 -8 -8 13 2056.75 324.978 5
 -8 -8 12 602.875 182.611 5
 -8 -8 11 228.136 122.211 5
 -8 -8 10 225.892 108.365 5
 -8 -8 9 887.503 215.212 5
 -8 -8 8 265.861 148.046 5
 -8 -8 7 2662.25 401.66 5
 -8 -8 6 168.516 106.187 5
 -8 -8 5 -326.153 144.981 5
 -8 -8 4 6253.49 622.294 5
 -8 -8 3 4933.33 558.504 5
 -8 -8 2 5789.94 611.449 5
 -8 -8 1 -84.1329 125.003 5
 -8 -8 0 4731.16 553.558 5
 -8 -8 0 4303.15 545.789 4
 -8 -8 -1 -6.30051 60.2548 4
 -8 -8 -1 113.33 56.4747 5
 -8 -8 -2 6827.37 682.415 5
 -8 -8 -2 6681.05 725.569 4
 -8 -8 -3 15994.5 1044.94 5
 -8 -8 -3 15934.2 1164.94 4
 -8 -8 -4 2450.92 471.409 4
 -8 -8 -4 2732.45 425.896 5
 -8 -8 -5 368.597 193.599 4
 -8 -8 -5 595.341 209.322 5
 -8 -8 -6 36.0451 107.94 4
 -8 -8 -6 293.437 151.575 5
 -8 -8 -7 2080.69 474.258 4
 -8 -8 -7 2428.28 409.943 5
 -8 -8 -8 210.239 155.527 4
 -8 -8 -9 1509.2 423.022 4
 -8 -8 -10 397.637 222.866 4
 -8 -8 -11 56.3385 88.8258 4
 8 -8 12 344.943 219.673 1
 8 9 -16 -49.6877 94.8362 2
 8 9 -15 705.628 277.599 2
 -8 -9 14 171.495 92.093 5
 8 9 -14 87.4331 81.8038 2
 8 9 -13 1356.6 340.539 2
 -8 -9 13 1733.81 308.547 5
 -8 -9 12 216.932 118.156 5
 -8 -9 11 2092.19 346.652 5
 -8 -9 10 -42.266 83.8973 5
 -8 -9 9 834.224 218.196 5
 -8 -9 8 909.566 237.366 5
 -8 -9 7 133.35 128.868 5
 -8 -9 6 1554.3 317.721 5
 -8 -9 5 5127.83 580.372 5
 -8 -9 4 1163.9 289.282 5
 -8 -9 3 70.5977 92.4068 5
 -8 -9 2 1997.71 379.856 5
 -8 -9 1 295.058 136.868 5
 -8 -9 1 367.538 156.881 4
 -8 -9 0 4.34404 82.3091 5
 -8 -9 0 14.8943 60.2624 4
 -8 -9 -1 -174.851 146.475 4
 -8 -9 -1 154.669 115.355 5
 -8 -9 -2 47.2719 84.5625 4
 -8 -9 -2 -62.4187 93.8096 5
 -8 -9 -3 1600.49 373.847 4
 -8 -9 -3 1575.83 339.376 5
 -8 -9 -4 533.219 223.394 4
 -8 -9 -4 428.294 176.493 5
 -8 -9 -5 1753.16 414.51 4
 -8 -9 -5 1163.32 306.75 5
 -8 -9 -6 524.062 232.656 4
 -8 -9 -6 857.423 263.203 5
 -8 -9 -7 1370.33 391.534 4
 -8 -9 -7 1535.06 342.589 5
 -8 -9 -8 433.241 235.938 4
 -8 -9 -9 767.488 329.599 4
 -8 -9 -10 531.764 259.401 4
 -8 -9 -11 2036.35 544.911 4
 8 10 -15 273.519 179.486 2
 8 10 -14 348.533 202.739 2
 8 10 -13 251.984 190.397 2
 -8 -10 13 102.749 73.7541 5
 8 10 -12 86.2396 111.847 2
 -8 -10 12 43.6901 36.0234 5
 -8 -10 11 -28.8132 76.2581 5
 -8 -10 10 220.255 124.627 5
 -8 -10 9 2728.69 418.685 5
 -8 -10 8 1227.81 293.71 5
 -8 -10 7 3324.3 476.919 5
 -8 -10 6 130.565 93.2362 5
 -8 -10 5 1511.6 329.176 5
 -8 -10 4 6351.39 682.399 5
 -8 -10 3 389.961 190.244 5
 -8 -10 2 95.1722 96.2318 5
 -8 -10 1 -124.684 113.826 5
 -8 -10 1 108.152 113.041 4
 -8 -10 0 4533.66 600.759 5
 -8 -10 0 4793.14 600.987 4
 -8 -10 -1 2988.82 488.463 4
 -8 -10 -1 3498.96 521.855 5
 -8 -10 -2 -76.2876 72.5167 4
 -8 -10 -2 -30.1107 65.3777 5
 -8 -10 -3 308.249 191.311 4
 -8 -10 -3 103.2 80.2961 5
 -8 -10 -4 33.0662 69.6991 4
 -8 -10 -4 -157.864 126.404 5
 -8 -10 -5 561.712 215.112 4
 -8 -10 -5 1049.99 295.506 5
 -8 -10 -6 32.4931 107.314 4
 -8 -10 -6 -24.0678 46.653 5
 -8 -10 -7 39.5788 109.515 4
 -8 -10 -7 187.455 117.982 5
 -8 -10 -8 754.878 313.914 4
 -8 -10 -8 647.951 233.34 5
 -8 -10 -9 93.7505 121.923 4
 -8 -10 -10 263.219 183.511 4
 8 11 -15 589.274 260.389 2
 8 11 -14 995.287 307.166 2
 -8 -11 13 -35.6454 54.8947 5
 8 11 -13 259.281 205.767 2
 8 11 -12 314.404 166.868 2
 -8 -11 12 211.687 118.51 5
 -8 -11 11 448.995 164.523 5
 -8 -11 10 -21.1692 58.4021 5
 -8 -11 9 -35.8075 68.9812 5
 -8 -11 8 964.431 259.703 5
 -8 -11 7 4338.98 562.33 5
 -8 -11 6 210.623 158.383 5
 -8 -11 5 2691.14 451.939 5
 -8 -11 4 265.743 189.217 5
 -8 -11 3 2618.51 455.761 5
 -8 -11 2 718.213 249.395 5
 -8 -11 1 1025.34 305.126 5
 -8 -11 1 1255.67 310.557 4
 -8 -11 0 15.4935 55.5221 4
 -8 -11 0 165.74 165.161 5
 -8 -11 -1 2494.23 457.397 4
 -8 -11 -1 3087.23 509.693 5
 -8 -11 -2 616.403 220.099 4
 -8 -11 -2 -35.896 79.8532 5
 -8 -11 -3 5324.47 681.496 5
 -8 -11 -3 4590.48 675.184 4
 -8 -11 -4 -202.424 174.621 4
 -8 -11 -4 21.0112 89.3836 5
 -8 -11 -5 -92.8757 132.157 4
 -8 -11 -5 -36.4896 91.7168 5
 -8 -11 -6 255.335 182.439 4
 -8 -11 -6 134.445 81.9509 5
 -8 -11 -7 -85.8978 164.469 4
 -8 -11 -7 -163.111 130.901 5
 -8 -11 -8 -165.303 183.94 4
 -8 -11 -8 113.378 90.4965 5
 -8 -11 -9 404.486 289.48 4
 8 12 -14 715.717 288.041 2
 -8 -12 13 900.426 245.559 5
 8 12 -13 278.656 171.269 2
 -8 -12 12 1677.44 343.104 5
 8 12 -12 1524.81 372.483 2
 8 12 -11 54.1191 65.7132 2
 -8 -12 11 -85.4239 98.1089 5
 -8 -12 10 195.008 115.187 5
 -8 -12 9 175.828 110.515 5
 -8 -12 8 2260.46 417.577 5
 -8 -12 7 153.355 139.063 5
 -8 -12 6 1456.99 347.306 5
 -8 -12 5 38.0318 83.8896 5
 -8 -12 4 1601.89 379.769 5
 -8 -12 3 797.087 256.448 5
 -8 -12 2 144.467 188.712 5
 -8 -12 1 1472.34 379.921 5
 -8 -12 1 1276.66 317.271 4
 -8 -12 0 402.138 188.479 4
 -8 -12 0 607.082 244.777 5
 -8 -12 -1 780.685 269.135 4
 -8 -12 -1 420.324 184.47 5
 -8 -12 -2 -79.7567 110.5 4
 -8 -12 -2 -358.795 190.192 5
 -8 -12 -3 517.953 230.428 4
 -8 -12 -3 278.488 158.011 5
 -8 -12 -4 683.344 275.199 4
 -8 -12 -4 552.91 245.347 5
 -8 -12 -5 135.401 173.756 4
 -8 -12 -5 33.7058 61.4735 5
 -8 -12 -6 -352.642 214.99 4
 -8 -12 -6 -1.81454 70.0621 5
 -8 -12 -7 -159.936 152.126 4
 -8 -12 -7 -18.3911 85.7296 5
 -8 -12 -8 419.552 237.465 4
 -8 -12 -8 374.623 192.977 5
 -8 -12 -9 204.646 266.17 4
 8 13 -14 -112.513 123.061 2
 8 13 -13 113.837 145.621 2
 -8 -13 12 68.1177 103.626 5
 8 13 -12 276.265 176.175 2
 8 13 -11 -173.568 130.843 2
 -8 -13 11 4.70637 57.8494 5
 8 13 -10 638.261 232.837 2
 -8 -13 10 433.748 184.147 5
 -8 -13 9 78.287 83.927 5
 -8 -13 8 -129.71 144.081 5
 -8 -13 7 818.975 263.446 5
 -8 -13 6 529.691 217.308 5
 -8 -13 5 3237.12 534.323 5
 -8 -13 4 -105.527 82.2288 5
 -8 -13 3 319.368 149.231 5
 -8 -13 2 363.479 201.406 5
 -8 -13 1 93.7823 74.0335 5
 -8 -13 1 53.9908 95.6653 4
 -8 -13 0 400.259 184.73 4
 -8 -13 0 751.597 288.904 5
 -8 -13 -1 2476.36 483.579 4
 -8 -13 -1 3371.2 592.067 5
 -8 -13 -2 -88.0956 82.4323 4
 -8 -13 -2 -109.08 151.791 5
 -8 -13 -3 829.783 303.066 4
 -8 -13 -3 1067.1 348.011 5
 -8 -13 -4 618.062 262.38 4
 -8 -13 -4 699.039 268.12 5
 -8 -13 -5 1100.59 370.785 4
 -8 -13 -5 1262.84 355.996 5
 -8 -13 -6 93.1432 98.2771 4
 -8 -13 -6 -77.3242 108.452 5
 -8 -13 -7 128.259 141.833 4
 -8 -13 -7 -145.356 130.925 5
 -8 -13 -8 214.324 200.754 4
 -8 -13 -8 16.6951 78.893 5
 8 -14 -13 191.943 181.673 3
 8 14 -13 100.283 116.583 2
 -8 -14 12 -15.8664 49.9583 5
 8 14 -12 36.5917 97.97 2
 -8 -14 11 -145.403 117.549 5
 8 14 -11 30.8273 90.5322 2
 8 14 -10 488.896 216.192 2
 -8 -14 10 198.723 145.892 5
 8 14 -9 0.73216 75.7624 2
 -8 -14 9 -1.62044 84.2188 5
 -8 -14 8 595.139 219.271 5
 -8 -14 7 318.5 203.429 5
 -8 -14 6 309.247 184.463 5
 -8 -14 5 270.796 153.874 5
 -8 -14 4 1510.99 403.773 5
 -8 -14 3 21.919 59.8236 5
 -8 -14 2 1399.65 384.158 5
 -8 -14 1 -32.5114 154.351 5
 -8 -14 1 298.851 204.42 4
 -8 -14 0 2854.3 509.269 4
 -8 -14 0 2923.29 551.142 5
 -8 -14 -1 78.2963 89.8366 4
 -8 -14 -1 129.226 202.489 5
 -8 -14 -2 501.475 249.815 4
 -8 -14 -2 506.996 224.401 5
 -8 -14 -3 183.53 135.662 4
 -8 -14 -3 -24.0689 101.108 5
 -8 -14 -4 221.589 120.522 4
 -8 -14 -4 752.016 286.906 5
 -8 -14 -5 64.6195 155.769 4
 -8 -14 -5 -203.542 157.049 5
 -8 -14 -6 406.51 259.412 4
 -8 -14 -6 -142.797 132.963 5
 -8 -14 -7 596.586 308.191 4
 -8 -14 -7 360.654 188.021 5
 -8 -14 -8 431.831 218.75 5
 8 15 -13 224.11 167.207 2
 -8 -15 12 186.245 116.068 5
 8 -15 -12 118.179 147.439 3
 8 15 -12 273.769 193.521 2
 -8 -15 11 17.1049 95.1838 5
 8 15 -11 89.9794 120.363 2
 -8 -15 10 290.546 175.618 5
 8 15 -10 238.624 163.396 2
 -8 -15 9 112.863 99.1364 5
 8 15 -9 449.586 205.611 2
 8 15 -8 135.027 114.397 2
 -8 -15 8 89.4751 127.326 5
 -8 -15 7 2912.39 530.884 5
 8 15 -7 3842.59 520.283 2
 -8 -15 6 279.951 174.59 5
 -8 -15 5 11.8657 115.296 5
 -8 -15 4 868.025 317.094 5
 -8 -15 3 1006.6 336.911 5
 -8 -15 2 2223.51 495.841 5
 -8 -15 1 242.253 185.742 5
 -8 -15 1 312.322 185.942 4
 -8 -15 0 946.294 302.04 4
 -8 -15 0 1447.4 398.466 5
 -8 -15 -1 852.14 298.98 4
 -8 -15 -1 785.143 292.556 5
 -8 -15 -2 130.145 129.807 4
 -8 -15 -2 -10.5993 73.9247 5
 -8 -15 -3 805.464 320.354 4
 -8 -15 -3 594.504 277.078 5
 -8 -15 -4 130.241 122.05 4
 -8 -15 -4 106.703 101.761 5
 -8 -15 -5 38.7509 95.7798 4
 -8 -15 -5 29.9218 102.936 5
 -8 -15 -6 -37.949 86.3836 4
 -8 -15 -6 -179.894 153.451 5
 -8 -15 -7 -5.70176 56.7114 5
 -8 -15 -8 106.301 106.158 5
 8 16 -12 -67.032 97.4478 2
 -8 -16 11 213.524 152.921 5
 8 -16 -11 294.986 226.646 3
 8 16 -11 30.9074 67.0557 2
 -8 -16 10 253.145 166.436 5
 8 16 -10 141.701 111.756 2
 -8 -16 9 640.027 229.086 5
 8 16 -9 587.564 242.68 2
 -8 -16 8 753.595 288.946 5
 8 16 -8 148.872 124.805 2
 -8 -16 7 1918.37 444.113 5
 -8 -16 6 139.02 99.5302 5
 -8 -16 5 2256.23 501.042 5
 -8 -16 4 -32.8621 123.194 5
 -8 -16 3 339.497 176.773 5
 -8 -16 2 -67.9358 83.5237 5
 -8 -16 1 318.985 203.275 5
 -8 -16 1 222.34 135.987 4
 -8 -16 0 1225.26 350.383 4
 -8 -16 0 902.232 344.474 5
 -8 -16 -1 204.407 148.958 4
 -8 -16 -1 311.659 179.161 5
 -8 -16 -2 507.874 248.427 4
 -8 -16 -2 -243.635 177.378 5
 -8 -16 -3 622.85 264.374 4
 -8 -16 -3 67.9807 150.289 5
 -8 -16 -4 804.044 318.337 4
 -8 -16 -4 993.286 341.449 5
 -8 -16 -5 178.147 192.152 4
 -8 -16 -5 45.4177 104.129 5
 -8 -16 -6 62.8989 100.218 5
 -8 -16 -7 -2.84386 71.8914 5
 8 17 -12 743.439 301.976 2
 -8 -17 11 -79.6426 104.609 5
 8 17 -11 -218.393 160.805 2
 -8 -17 10 -53.9725 87.135 5
 8 -17 -10 -219.339 173.694 3
 8 17 -10 -20.0914 70.0975 2
 -8 -17 9 68.6827 118.885 5
 8 -17 -9 497.559 269.109 3
 -8 -17 8 382.812 194.911 5
 8 -17 -8 43.875 76.907 3
 -8 -17 7 97.9492 141.204 5
 -8 -17 6 50.4928 98.7367 5
 -8 -17 5 1469.93 419.487 5
 -8 -17 4 150.693 134.788 5
 -8 -17 3 86.5083 112.233 5
 -8 -17 2 201.429 172.939 5
 -8 -17 1 172.163 134.662 5
 -8 -17 1 327.211 208.929 4
 -8 -17 0 235.619 197.883 4
 -8 -17 0 -73.7606 110.456 5
 -8 -17 -1 180.317 149.31 4
 -8 -17 -1 77.925 69.8835 5
 -8 -17 -2 -68.9883 101.427 4
 -8 -17 -2 266.206 206.617 5
 -8 -17 -3 -9.92461 68.469 4
 -8 -17 -3 -108.678 140.084 5
 -8 -17 -4 283.913 200.113 4
 -8 -17 -4 377.886 227.261 5
 -8 -17 -5 36.6769 97.2257 5
 -8 -18 10 40.9074 83.7126 5
 -8 -18 9 796.456 297.418 5
 8 -18 -9 490.858 236.748 3
 -8 -18 8 41.1668 136.877 5
 8 -18 -8 -21.1192 67.2254 3
 -8 -18 7 269.144 190 5
 8 -18 -7 -180.24 145.371 3
 -8 -18 6 232.698 164.75 5
 8 -18 -6 -108.645 113.061 3
 -8 -18 5 1270.77 378.341 5
 -8 -18 4 -3.4971 111.471 5
 -8 -18 3 494.625 249.965 5
 -8 -18 2 292.363 216.428 5
 -8 -18 1 245.429 185.676 5
 -8 -18 1 173.676 147.879 4
 -8 -18 0 44.421 78.0979 4
 -8 -18 0 -8.78605 63.948 5
 -8 -18 -1 -101.016 119.53 4
 -8 -18 -1 111.935 148.419 5
 -8 -18 -2 -77.7966 116.551 4
 -8 -18 -2 30.1097 174.519 5
 -8 -18 -3 777.485 321.743 4
 8 -19 -8 262.641 204.855 3
 8 -19 -7 87.496 108.474 3
 -8 -19 0 -8.62847 60.0897 4
 -8 -19 -1 453.553 247.728 4
 -8 -19 -2 686.203 311.124 4
 9 0 -19 133.279 130.441 2
 9 0 -18 -186.194 144.783 2
 9 0 -17 333.182 178.533 2
 9 0 -16 -53.74 77.6949 2
 -9 0 16 232.803 119.967 5
 -9 0 15 3537.3 443.278 5
 -9 0 14 -2.7809 44.3679 5
 -9 0 13 -36.6188 37.5072 5
 -9 0 12 -66.0767 100.685 5
 -9 0 11 11671.5 716.933 5
 -9 0 10 -17.545 52.4492 5
 -9 0 9 781.59 181.496 5
 -9 0 8 -9.11034 59.0824 5
 -9 0 7 5423.21 457.468 5
 -9 0 6 32.9975 64.2569 5
 -9 0 5 798.914 173.339 5
 -9 0 4 -48.7434 56.7778 5
 -9 0 3 18065.1 795.359 5
 -9 0 2 53.68 36.4037 5
 -9 0 1 1609.69 228.753 5
 -9 0 0 -72.6924 62.1075 5
 -9 0 -1 7038.2 458.708 5
 -9 0 -2 -34.7847 51.3199 5
 -9 0 -3 440.45 106.707 5
 -9 0 -4 -60.9301 42.5487 5
 -9 0 -5 1200.03 171.1 5
 9 0 5 1197.54 276.557 1
 9 0 6 -55.1537 85.6726 1
 9 0 7 2329.57 424.302 1
 9 0 8 -76.936 86.2651 1
 9 0 9 41.9579 75.6874 1
 9 0 10 -109.791 104.091 1
 9 0 11 1579.44 400.517 1
 9 0 12 -208.229 147.573 1
 9 -1 -19 25.1229 55.3204 2
 9 1 -18 287.949 195.615 2
 9 -1 -18 88.0354 118.914 2
 9 1 -17 278.02 156.818 2
 9 -1 -17 161.352 95.2879 2
 -9 -1 16 106.436 85.61 5
 9 1 -16 -157.816 122.127 2
 -9 1 15 1206.95 267.348 5
 -9 -1 15 1121.77 244.797 5
 -9 1 14 3903.9 466.886 5
 -9 -1 14 3987.75 449.71 5
 -9 1 13 1074.71 238.567 5
 -9 -1 13 803.69 208.346 5
 -9 1 12 628.351 175.882 5
 -9 -1 12 845.499 204.032 5
 -9 -1 11 732.78 178.826 5
 -9 1 11 534.684 139.352 5
 -9 1 10 3723.27 404.241 5
 -9 -1 10 4349.73 431.421 5
 -9 1 9 4204.22 415.857 5
 -9 -1 9 4966.81 451.68 5
 -9 1 8 -22.5433 44.2673 5
 -9 -1 8 -20.5182 55.0536 5
 -9 1 7 -63.8717 87.3574 5
 -9 -1 7 -2.38027 59.6604 5
 -9 1 6 7385.06 521.489 5
 -9 -1 6 7922.31 552.879 5
 -9 1 5 11197.6 631.528 5
 -9 -1 5 12090 672.944 5
 -9 1 4 -56.626 68.6691 5
 -9 -1 4 12.208 60.655 5
 -9 1 3 1742.42 241.491 5
 -9 -1 3 1322.81 218.735 5
 -9 1 2 2690.43 292.65 5
 -9 -1 2 2647.99 306.074 5
 -9 1 1 363.416 108.559 5
 -9 -1 1 489.825 133.034 5
 -9 1 0 970.817 171.901 5
 -9 -1 0 1081.84 194.248 5
 -9 1 -1 234.315 75.0856 5
 -9 -1 -1 378.545 115.72 5
 -9 1 -2 1991.3 229.062 5
 -9 -1 -2 2158.04 263.202 5
 9 1 3 -13.3155 66.7405 1
 -9 1 -3 -8.86395 28.2266 5
 -9 -1 -3 -17.6859 46.7839 5
 -9 1 -4 125.979 63.7391 5
 -9 -1 -4 75.6144 54.0577 5
 -9 -1 -5 169.233 69.6343 5
 9 1 5 220.733 86.8169 1
 9 -1 6 649.639 213.903 1
 9 1 6 754.19 230.863 1
 9 1 7 813.958 230.014 1
 9 -1 7 968.723 269.328 1
 -9 -1 -7 673.355 239.047 4
 9 1 8 429.387 186.188 1
 9 -1 8 262.751 143.6 1
 -9 -1 -8 329.805 169.552 4
 9 1 9 -348.93 174.68 1
 9 -1 9 -33.5615 111.17 1
 -9 -1 -9 -81.5554 91.7956 4
 9 -1 10 95.9342 72.5826 1
 9 1 10 288.425 172.242 1
 -9 -1 -10 395.553 204.328 4
 9 -1 11 -65.2545 89.8062 1
 9 1 11 272.431 178.611 1
 -9 -1 -11 168.197 119.499 4
 9 1 12 42.2813 83.3473 1
 9 -1 12 -154.45 129.557 1
 9 -2 -19 35.7581 81.683 2
 9 2 -18 -155.723 138.911 2
 9 -2 -18 -190.701 138.808 2
 9 -2 -17 101.337 117.095 2
 9 2 -17 -76.2387 139.16 2
 -9 -2 16 242.378 116.134 5
 9 2 -16 277.433 151.471 2
 -9 -2 15 156.024 96.5651 5
 -9 2 14 105.357 82.1199 5
 -9 -2 14 116.54 89.0494 5
 -9 2 13 112.084 65.5228 5
 -9 -2 13 189.665 114.632 5
 -9 2 12 1186.01 248.077 5
 -9 -2 12 1811.32 290.359 5
 -9 2 11 1137.77 231.868 5
 -9 -2 11 1418.85 255.411 5
 -9 2 10 761.859 190.316 5
 -9 -2 10 900.227 194.328 5
 -9 2 9 3519.98 386.627 5
 -9 -2 9 3205.61 368.724 5
 -9 -2 8 4639.14 438.057 5
 -9 2 8 3684.13 383.011 5
 -9 2 7 17.7282 55.4868 5
 -9 -2 7 57.7195 43.6261 5
 -9 2 6 -9.78729 70.187 5
 -9 -2 6 -61.1467 78.936 5
 -9 -2 5 170.556 91.9726 5
 -9 2 5 157.785 94.1564 5
 -9 2 4 8234.94 529.013 5
 -9 -2 4 8196.29 565.351 5
 -9 2 3 4001.48 356.301 5
 -9 -2 3 4088.34 401.243 5
 -9 2 2 49.3172 79.696 5
 -9 -2 2 60.3133 72.8563 5
 -9 -2 1 5069.1 441.997 5
 -9 2 1 4871.21 380.209 5
 -9 2 0 -40.3146 35.5421 5
 -9 -2 0 -34.4768 38.7857 5
 -9 2 -1 8464.02 474.028 5
 -9 -2 -1 8526.57 563.89 5
 9 2 1 7563.25 598.847 1
 -9 2 -2 983.354 159.065 5
 -9 -2 -2 1028.17 198.98 5
 9 2 2 1232.64 247.61 1
 -9 2 -3 2251.39 232.51 5
 -9 -2 -3 2273.36 290.454 5
 9 2 3 2106.64 346.451 1
 -9 2 -4 32.3192 22.3627 5
 9 2 4 -37.5964 81.6964 1
 -9 -2 -5 4088.24 373.347 5
 -9 -2 -5 3517.67 513.723 4
 9 2 5 2848.84 428.238 1
 9 2 6 -49.4186 83.4901 1
 -9 -2 -6 92.0474 137.62 4
 9 2 7 -36.5906 83.7555 1
 -9 -2 -7 58.3756 66.0989 4
 9 2 8 49.2716 52.5184 1
 9 -2 8 -10.5068 43.9559 1
 -9 -2 -8 74.8173 68.9286 4
 -9 -2 -9 129.634 132.515 4
 9 2 9 154.81 130.909 1
 9 -2 9 238.266 132.217 1
 -9 -2 -10 239.432 158.416 4
 9 2 10 172.571 132.2 1
 9 -2 10 -168.172 129.312 1
 -9 -2 -11 -105.845 115.337 4
 9 -2 11 65.4048 97.3316 1
 9 2 11 280.452 174.46 1
 -9 -2 -12 47.3578 78.0045 4
 9 -2 12 80.673 108.222 1
 9 2 12 14.3006 74.7311 1
 9 3 -18 192.724 160.025 2
 9 -3 -18 120.236 77.0182 2
 9 -3 -17 254.612 139.254 2
 9 3 -17 162.567 151.328 2
 9 3 -16 126.742 153.699 2
 -9 -3 16 -94.4842 84.3908 5
 9 -3 -16 -67.4081 98.2447 2
 -9 -3 15 -15.03 29.8326 5
 -9 -3 14 1717.77 291.133 5
 -9 -3 13 474.417 142.719 5
 -9 3 12 817.278 206.154 5
 -9 -3 12 1031.51 219.087 5
 -9 3 11 1830.06 294.613 5
 -9 -3 11 1876.38 291.894 5
 -9 3 10 1449.71 267.751 5
 -9 -3 10 1678.38 275.729 5
 -9 3 9 975.347 213.694 5
 -9 -3 9 1017.14 213.681 5
 9 3 -8 1517.01 136.403 1
 -9 -3 8 1307.26 237.742 5
 -9 3 8 1463.4 248.075 5
 -9 3 7 1431.67 243.226 5
 9 3 -7 1632.42 170.182 1
 -9 -3 7 1499.59 248.181 5
 -9 3 6 4636.7 418.729 5
 -9 -3 6 4467.11 438.841 5
 9 3 -6 4373.15 307.073 1
 -9 3 5 395.622 131.941 5
 -9 -3 5 558.569 163.076 5
 9 3 -5 556.818 125.454 1
 -9 3 4 458.9 122.939 5
 -9 -3 4 355.59 133.838 5
 9 3 -4 423.787 119.604 1
 -9 3 3 126.234 80.4231 5
 -9 -3 3 194.858 103.54 5
 -9 3 2 165.022 86.0023 5
 -9 -3 2 -6.37872 64.4555 5
 -9 3 1 9400.54 525.839 5
 -9 -3 1 9845.05 643.32 5
 -9 3 0 1942.82 237.976 5
 -9 -3 0 2280.58 316.867 5
 9 3 0 2179.41 308.815 1
 -9 3 -1 6069.23 401.175 5
 -9 -3 -1 5319.91 475.784 5
 9 3 1 5322.48 510.941 1
 -9 3 -2 2492.87 252.217 5
 -9 -3 -2 2487.63 321.605 5
 9 3 2 2023.51 328.333 1
 9 3 3 1560.27 299.767 1
 -9 3 -3 1840.37 210.741 5
 -9 -3 -3 2281.45 310.776 5
 -9 3 -4 305.163 77.7705 5
 9 3 4 247.143 99.4928 1
 -9 -3 -4 260.94 97.8346 5
 -9 -3 -4 345.086 197.465 4
 9 3 5 -110.805 114.846 1
 -9 -3 -5 26.466 34.179 5
 -9 -3 -5 159.731 153.185 4
 9 3 6 14005.3 972.969 1
 -9 -3 -6 13342.7 1058.59 4
 -9 -3 -7 67.2259 119.232 4
 9 3 7 -26.7581 78.5414 1
 -9 -3 -8 1354.49 351.275 4
 9 -3 8 1033.57 277.909 1
 9 3 8 946.678 273.402 1
 9 3 9 -100.858 102.378 1
 -9 -3 -9 37.1126 69.048 4
 9 -3 9 135.849 154.532 1
 -9 -3 -10 745.806 266.534 4
 9 3 10 412.062 204.21 1
 9 -3 10 692.255 265.624 1
 -9 -3 -11 183.728 144.033 4
 9 3 11 195.542 139.074 1
 9 -3 11 82.1284 81.9762 1
 -9 -3 -12 1.08176 50.6393 4
 9 3 12 -144.217 123.941 1
 9 -3 12 105.161 111.392 1
 9 -4 -18 61.8478 112.014 2
 9 4 -17 -45.4418 110.981 2
 9 -4 -17 -9.91019 51.1066 2
 9 -4 -16 135.167 94.3652 2
 -9 -4 16 238.152 113.053 5
 9 4 -16 259.934 147.864 2
 -9 -4 15 177.129 102.155 5
 -9 -4 14 335.386 133.499 5
 -9 -4 13 512.406 161.224 5
 -9 -4 12 2155.66 314.047 5
 -9 4 11 707.222 184.386 5
 -9 -4 11 670.826 182.387 5
 -9 4 10 52.1047 93.7513 5
 -9 -4 10 20.4234 57.9546 5
 -9 4 9 242.034 97.2055 5
 -9 -4 9 270.243 119.437 5
 -9 4 8 1782.07 282.998 5
 -9 -4 8 1871.47 290.073 5
 -9 -4 7 197.885 115.233 5
 -9 4 7 141.565 75.9078 5
 9 4 -7 189.8 51.8921 1
 -9 4 6 383.046 142.462 5
 9 4 -6 469.2 98.4413 1
 -9 -4 6 329.905 137.171 5
 -9 4 5 2879.05 329.257 5
 -9 -4 5 3269.22 386.96 5
 9 4 -5 2895.76 270.538 1
 9 4 -4 -43.1939 57.5214 1
 -9 4 4 -10.0633 59.4639 5
 -9 -4 4 107.547 96.0237 5
 -9 4 3 -28.0987 56.16 5
 -9 -4 3 54.8242 44.6241 5
 -9 4 2 986.37 183.801 5
 -9 -4 2 1222.05 250.433 5
 -9 4 1 1902.36 244.417 5
 9 4 -1 1968.43 279.526 1
 -9 -4 1 2196.61 321.147 5
 9 4 0 161.992 88.301 1
 -9 4 0 301.323 92.193 5
 -9 -4 0 353.121 126.227 5
 -9 4 -1 446.104 111.348 5
 9 4 1 263.202 112.479 1
 -9 -4 -1 506.004 155.555 5
 -9 4 -2 -9.41055 28.0137 5
 9 4 2 129.821 100.692 1
 -9 -4 -2 100.533 86.5491 5
 -9 4 -3 8.61646 22.6761 5
 9 4 3 -101.464 114.465 1
 -9 -4 -3 31.0236 66.7648 5
 -9 -4 -3 -38.7075 98.813 4
 -9 -4 -4 9873.36 678.853 5
 -9 4 -4 9834.98 471.821 5
 9 4 4 9755.69 767.869 1
 -9 -4 -4 9592.11 870.726 4
 -9 -4 -5 2226.51 434.953 4
 -9 -4 -5 1588.57 276.111 5
 9 4 5 1597.98 322.94 1
 -9 -4 -6 1403.45 355.684 4
 -9 -4 -6 919.541 205.96 5
 9 4 6 968.301 264.02 1
 -9 -4 -7 -68.9777 151.985 4
 9 4 7 -62.1161 105.772 1
 -9 -4 -8 2016.77 449.133 4
 9 4 8 2725.74 462.027 1
 -9 -4 -9 2644.92 517.527 4
 9 -4 9 2769.51 483.739 1
 9 4 9 2720.46 488.991 1
 -9 -4 -10 1198.52 354.73 4
 9 -4 10 231.954 125.427 1
 9 4 10 901.294 281.91 1
 -9 -4 -11 205.979 146.03 4
 9 4 11 22.0231 59.2272 1
 9 -4 12 944.774 308.719 1
 -9 -4 -12 17.3732 80.596 4
 9 5 -17 111.106 138.009 2
 9 5 -16 421.408 218.784 2
 9 -5 -16 451.046 184.183 2
 -9 -5 15 80.1454 73.9838 5
 -9 -5 14 -11.2216 49.8996 5
 -9 -5 13 -11.6585 53.7288 5
 -9 -5 12 82.0549 74.7274 5
 -9 -5 11 729.345 190.925 5
 -9 -5 10 176.242 110.195 5
 -9 5 9 2120.99 326.93 5
 -9 -5 9 2156.7 322.054 5
 -9 5 8 187.933 85.3584 5
 -9 -5 8 413.867 156.991 5
 -9 5 7 1055.1 210.237 5
 -9 -5 7 1304.32 259.55 5
 -9 5 6 1922.11 283.223 5
 -9 -5 6 2015.89 313.834 5
 9 5 -6 2143.84 203.875 1
 -9 5 5 3681.98 389.506 5
 -9 -5 5 3111.66 410.834 5
 9 5 -5 3536.88 293.697 1
 -9 5 4 -14.2162 44.6497 5
 -9 -5 4 -43.5775 107.157 5
 9 5 -4 68.8659 30.1833 1
 -9 5 3 2550.21 309.345 5
 -9 -5 3 2482.34 364.703 5
 -9 5 2 1393.19 220.77 5
 -9 -5 2 1087.34 237.07 5
 -9 5 1 938.757 176.567 5
 -9 -5 1 1040.12 236.017 5
 9 5 -1 891.691 202.186 1
 -9 5 0 3583.43 338.764 5
 -9 -5 0 4073.3 459.073 5
 9 5 0 3442 393.59 1
 -9 5 -1 1460.58 215.967 5
 -9 -5 -1 1024.39 226 5
 9 5 1 1236.41 250.029 1
 -9 5 -2 213.94 80.6567 5
 -9 -5 -2 153.708 87.1889 5
 9 5 2 -42.8158 78.0591 1
 -9 -5 -2 37.6821 74.8905 4
 -9 -5 -3 1678.58 297.452 5
 9 5 3 2310.57 370.525 1
 -9 -5 -3 1643.92 357.112 4
 -9 -5 -4 787.513 271.06 4
 -9 -5 -4 1116.41 242.472 5
 9 5 4 966.305 240.296 1
 -9 -5 -5 1619.11 382.537 4
 9 5 5 1859.91 354.78 1
 -9 -5 -5 1520.52 281.55 5
 -9 -5 -6 -85.4114 68.2142 4
 -9 -5 -6 -42.4186 88.8156 5
 -9 -5 -7 3064.08 550.073 4
 9 5 7 2616.97 442.52 1
 -9 -5 -8 108.269 128.149 4
 9 5 8 -64.1225 119.313 1
 9 5 9 1534.37 359.224 1
 -9 -5 -9 1442.66 398.992 4
 -9 -5 -10 49.913 59.379 4
 9 -5 10 139.808 127.112 1
 9 5 10 -16.9098 110.597 1
 -9 -5 -11 195.998 191.008 4
 9 5 11 40.508 72.8044 1
 9 -5 11 510.521 241.967 1
 -9 -5 -12 98.3048 126.94 4
 9 -5 12 -2.86293 56.5367 1
 9 6 -17 -13.8249 79.2441 2
 9 6 -16 208.477 168.686 2
 9 6 -15 940.494 309.167 2
 -9 -6 15 453.924 151.104 5
 -9 -6 14 259.82 119.757 5
 -9 -6 13 58.2131 57.4082 5
 -9 -6 12 140.24 77.0207 5
 -9 -6 11 8261.14 644.803 5
 -9 -6 10 443.207 173.941 5
 -9 -6 9 5020.91 511.484 5
 -9 -6 8 76.3749 48.8719 5
 -9 -6 7 912.778 221.916 5
 -9 -6 6 1096.61 241.677 5
 -9 6 5 2097.92 299.123 5
 -9 -6 5 2046.35 326.33 5
 9 6 -5 2182.12 230.915 1
 -9 -6 4 5362.82 554.633 5
 9 6 -4 6111.07 418.854 1
 -9 6 4 5651.74 482.995 5
 -9 6 3 -13.2641 59.8611 5
 -9 -6 3 106.28 63.5478 5
 -9 6 2 -34.1683 50.7585 5
 -9 -6 2 -67.1652 137.61 5
 9 6 -1 75.0214 72.767 1
 -9 -6 1 24.9228 59.3924 5
 -9 -6 0 9980.82 756.426 5
 9 6 0 9690.09 666.191 1
 9 6 1 -26.0424 47.4857 1
 -9 -6 -1 -4.37902 79.8272 5
 9 6 2 2369.97 364.616 1
 -9 -6 -2 2999.45 414.907 5
 -9 -6 -2 3098.26 498.496 4
 -9 -6 -3 -76.0243 172.814 4
 9 6 3 16.9481 43.9385 1
 -9 -6 -3 89.5779 70.2106 5
 -9 -6 -4 2734.47 486.282 4
 -9 -6 -4 2682.66 394.278 5
 9 6 4 3235.81 447.976 1
 -9 -6 -5 388.621 189.001 4
 -9 -6 -5 283.285 150.017 5
 9 6 5 269.327 148.255 1
 -9 -6 -6 1536.08 387.877 4
 -9 -6 -6 1041.76 246.116 5
 9 6 6 1399.58 306.318 1
 -9 -6 -7 37.8326 69.5618 4
 9 6 7 127.574 95.5669 1
 -9 -6 -8 278.813 178.864 4
 9 6 8 1362.16 324.704 1
 -9 -6 -9 236.907 171.865 4
 9 6 9 207.68 126.178 1
 -9 -6 -10 85.1158 120.99 4
 9 6 10 47.9956 63.1807 1
 -9 -6 -11 299.259 197.902 4
 9 -6 11 212.969 166.431 1
 -9 -6 -12 468.262 237.367 4
 9 -6 12 -44.709 83.3962 1
 9 7 -16 449.136 222.154 2
 9 7 -15 919.967 301.348 2
 -9 -7 15 815.452 208.807 5
 -9 -7 14 64.5373 87.6408 5
 -9 -7 13 1209.1 257.27 5
 -9 -7 12 70.2041 65.5364 5
 -9 -7 11 4453.94 486.425 5
 -9 -7 10 163.754 109.604 5
 -9 -7 9 2250.65 356.395 5
 -9 -7 8 51.9049 69.0398 5
 -9 -7 7 522.333 179.948 5
 -9 -7 6 2800.52 412.572 5
 -9 -7 5 990.945 234.997 5
 -9 -7 4 1222.16 266.156 5
 -9 -7 3 770.913 208.285 5
 -9 -7 2 9077.53 747.553 5
 9 7 -2 9496.56 597.449 1
 -9 -7 1 7135.12 666.568 5
 9 7 -1 7228.27 551.136 1
 9 7 0 763.967 198.14 1
 -9 -7 0 458.465 174.522 5
 9 7 1 1343.52 261.186 1
 -9 -7 -1 1185.15 273.173 5
 -9 -7 -1 1764.83 388.84 4
 9 7 2 1088.54 229.094 1
 -9 -7 -2 1224.17 279.711 5
 -9 -7 -2 1146.26 311.007 4
 -9 -7 -3 3288.26 534.555 4
 9 7 3 3062.35 420.704 1
 -9 -7 -3 3080.25 444.777 5
 -9 -7 -4 563.711 253.114 4
 9 7 4 495.677 192.597 1
 -9 -7 -4 438.888 162.539 5
 -9 -7 -5 10.3225 110.519 4
 -9 -7 -5 177.433 104.456 5
 9 7 5 310.174 144.371 1
 -9 -7 -6 -6.88451 91.4552 4
 9 7 6 114.046 102.767 1
 -9 -7 -6 42.6992 44.7549 5
 -9 -7 -7 838.926 296.483 4
 9 7 7 1285.86 318.559 1
 -9 -7 -8 1.75405 107.587 4
 9 7 8 28.4988 60.1163 1
 -9 -7 -9 175.203 143.224 4
 -9 -7 -10 865.773 333.233 4
 -9 -7 -11 288.451 189.082 4
 9 -7 11 165.276 164.932 1
 9 8 -16 288.435 164.445 2
 9 8 -15 353.231 173.267 2
 9 8 -14 187.269 127.54 2
 -9 -8 14 -202.403 108.892 5
 -9 -8 13 92.1827 88.7498 5
 -9 -8 12 1247.63 263.472 5
 -9 -8 11 41.4703 61.8862 5
 -9 -8 10 198.571 117.641 5
 -9 -8 9 28.661 56.8779 5
 -9 -8 8 2282.96 373.434 5
 -9 -8 7 939.829 249.077 5
 -9 -8 6 151.454 82.1131 5
 -9 -8 5 478.82 188.02 5
 -9 -8 4 420.695 155.115 5
 -9 -8 3 514.076 183.711 5
 -9 -8 2 2096.74 379.708 5
 -9 -8 1 3823.42 506.968 5
 -9 -8 0 1923.29 366.894 5
 -9 -8 -1 5352.14 600.559 5
 9 8 1 5577.02 533.73 1
 -9 -8 -1 4143.77 578.732 4
 -9 -8 -2 653.293 246.299 4
 -9 -8 -2 865.379 248.9 5
 9 8 2 903.51 221.259 1
 -9 -8 -3 1505.85 372.215 4
 -9 -8 -3 1043.39 270.348 5
 9 8 3 1423.41 297.218 1
 -9 -8 -4 3138.97 551.529 4
 -9 -8 -4 3375.51 484.135 5
 9 8 4 4227.48 511.79 1
 -9 -8 -5 104.766 99.3867 4
 9 8 5 128.172 119.985 1
 -9 -8 -5 44.0837 98.2388 5
 -9 -8 -6 -102.936 155.199 4
 -9 -8 -6 316.433 151.346 5
 -9 -8 -7 842.022 301.713 4
 -9 -8 -8 35.6929 118.483 4
 -9 -8 -9 465.568 255.723 4
 -9 -8 -10 506.146 257.157 4
 -9 -8 -11 12.9438 82.7306 4
 9 9 -16 819.418 304.744 2
 9 9 -15 291.282 183.678 2
 9 9 -14 599.498 269.155 2
 -9 -9 14 588.785 189 5
 -9 -9 13 722.792 207.125 5
 -9 -9 12 604.174 194.069 5
 -9 -9 11 2411.06 387.799 5
 -9 -9 10 1919.26 357.093 5
 -9 -9 9 190.67 126.141 5
 -9 -9 8 124.082 89.8493 5
 -9 -9 7 3720.42 498.671 5
 -9 -9 6 516.297 197.146 5
 -9 -9 5 3608.22 499.297 5
 -9 -9 4 -18.8617 103.958 5
 -9 -9 3 1418.81 335.833 5
 -9 -9 2 -25.2411 54.3818 5
 -9 -9 1 1807.65 378.878 5
 -9 -9 0 3703.19 517.832 5
 -9 -9 0 3294.48 511.687 4
 -9 -9 -1 -67.7065 81.6127 5
 -9 -9 -1 -10.2531 108.298 4
 -9 -9 -2 143.293 88.8501 4
 -9 -9 -2 58.1613 73.104 5
 -9 -9 -3 808.477 302.341 4
 -9 -9 -3 775.669 238.467 5
 -9 -9 -4 835.844 323.477 4
 -9 -9 -4 719.998 240.823 5
 -9 -9 -5 547.376 229.856 4
 -9 -9 -5 299.48 149.225 5
 -9 -9 -6 117.636 158.397 4
 -9 -9 -6 94.2819 126.525 5
 -9 -9 -7 135.724 163.183 4
 -9 -9 -7 96.7203 91.332 5
 -9 -9 -8 158.919 175.999 4
 -9 -9 -9 -111.322 129.185 4
 -9 -9 -10 275.603 160.114 4
 9 10 -15 256.494 181.203 2
 9 10 -14 -174.784 139.31 2
 -9 -10 14 -52.25 64.5715 5
 9 10 -13 23.1575 112.003 2
 -9 -10 13 187.178 110.453 5
 -9 -10 12 -39.5577 61.0307 5
 -9 -10 11 395.866 171.704 5
 -9 -10 10 544.717 190.186 5
 -9 -10 9 2039.36 368.951 5
 -9 -10 8 -69.8372 118.232 5
 -9 -10 7 3908.71 532.262 5
 -9 -10 6 5972.21 662.251 5
 -9 -10 5 -126.188 139.895 5
 -9 -10 4 178.356 138.804 5
 -9 -10 3 964.023 277.849 5
 -9 -10 2 1356.47 329.276 5
 -9 -10 1 1011.98 285.036 5
 -9 -10 0 -54.5404 111.228 5
 -9 -10 0 161.078 141.836 4
 -9 -10 -1 -28.4755 86.3179 4
 -9 -10 -1 -68.9247 87.6182 5
 -9 -10 -2 -12.7986 102.216 4
 -9 -10 -2 -30.2008 86.6063 5
 -9 -10 -3 179.531 146.575 4
 -9 -10 -3 252.821 162.979 5
 -9 -10 -4 1251.18 362.224 4
 -9 -10 -4 400.445 189.277 5
 -9 -10 -5 689.777 284.402 4
 -9 -10 -5 881.653 278.838 5
 -9 -10 -6 38.9108 64.9503 4
 -9 -10 -6 -40.6685 113.399 5
 -9 -10 -7 303.534 212.749 4
 -9 -10 -7 377.722 189.429 5
 -9 -10 -8 326.189 204.756 4
 -9 -10 -9 280.51 221.178 4
 9 11 -15 437.806 247.142 2
 -9 -11 14 -4.80744 54.1667 5
 9 11 -14 188.666 187.57 2
 9 11 -13 164.722 115.703 2
 -9 -11 13 -75.7363 74.9917 5
 -9 -11 12 101.94 112.556 5
 -9 -11 11 1750.1 351.119 5
 -9 -11 10 -31.2894 75.7076 5
 -9 -11 9 -22.6296 76.1117 5
 -9 -11 8 5228.8 631.145 5
 -9 -11 7 571.598 207.809 5
 -9 -11 6 2000.37 403.154 5
 -9 -11 5 137.56 155.082 5
 -9 -11 4 2281.31 431.579 5
 -9 -11 3 662.891 227.069 5
 -9 -11 2 1968.41 412.216 5
 -9 -11 1 57.2491 70.6763 5
 -9 -11 0 276.353 165.347 5
 -9 -11 0 240.746 159.417 4
 -9 -11 -1 187.028 169.556 4
 -9 -11 -1 168.273 154.363 5
 -9 -11 -2 3501.74 573.294 4
 -9 -11 -2 3758.96 569.47 5
 -9 -11 -3 2503.38 505.877 4
 -9 -11 -3 3057.98 534.588 5
 -9 -11 -4 86.2271 130.059 4
 -9 -11 -4 -34.869 63.936 5
 -9 -11 -5 -80.642 95.7558 4
 -9 -11 -5 -2.25401 70.5663 5
 -9 -11 -6 1280.31 418.535 4
 -9 -11 -6 1003.48 293.697 5
 -9 -11 -7 80.9687 119.955 4
 -9 -11 -7 154.427 134.403 5
 -9 -11 -8 227.743 197.09 4
 9 12 -14 218.934 170.615 2
 9 12 -13 260.155 176.71 2
 -9 -12 13 -24.7151 52.2381 5
 9 12 -12 221.256 130.578 2
 -9 -12 12 464.822 181.444 5
 -9 -12 11 -40.9579 85.0133 5
 -9 -12 10 168.947 116.998 5
 -9 -12 9 288.35 161.651 5
 -9 -12 8 463.136 198.692 5
 -9 -12 7 432.563 160.728 5
 -9 -12 6 12.4124 86.762 5
 -9 -12 5 304.402 170.385 5
 -9 -12 4 555.247 216.685 5
 -9 -12 3 577.117 247.277 5
 -9 -12 2 1130.13 326.075 5
 -9 -12 1 2548.29 480.259 5
 -9 -12 0 728.11 267.05 5
 -9 -12 0 360.673 195.681 4
 -9 -12 -1 882.719 298.942 4
 -9 -12 -1 1151.58 339.566 5
 -9 -12 -2 -9.38736 70.3874 4
 -9 -12 -2 87.6458 106.669 5
 -9 -12 -3 1020.88 339.024 4
 -9 -12 -3 634.778 255.577 5
 -9 -12 -4 40.0162 57.1415 4
 -9 -12 -4 34.6484 66.6531 5
 -9 -12 -5 1067.96 358.409 4
 -9 -12 -5 1105.86 330.166 5
 -9 -12 -6 281.271 203.225 4
 -9 -12 -6 -1.5391 60.7709 5
 -9 -12 -7 -234.914 187.179 4
 -9 -12 -7 25.4914 54.9229 5
 -9 -12 -8 -67.9605 151.848 4
 9 13 -14 408.902 214.149 2
 -9 -13 13 39.5417 68.8021 5
 9 13 -13 183.208 164.472 2
 9 13 -12 194.885 144.316 2
 -9 -13 12 290.679 144.097 5
 9 13 -11 35.2483 66.4542 2
 -9 -13 11 -1.99686 62.4767 5
 -9 -13 10 69.6876 82.5166 5
 -9 -13 9 105.696 103.812 5
 -9 -13 8 222.202 133.7 5
 -9 -13 7 259.094 190.814 5
 -9 -13 6 -78.0854 100.527 5
 -9 -13 5 -39.4964 92.3246 5
 -9 -13 4 131.202 115.268 5
 -9 -13 3 881.525 290.379 5
 -9 -13 2 1217.32 357.433 5
 -9 -13 1 23.5098 162.307 5
 -9 -13 0 440.077 229.36 5
 -9 -13 0 242.6 146.651 4
 -9 -13 -1 -13.9084 59.9792 4
 -9 -13 -1 -152.806 162.992 5
 -9 -13 -2 1736.21 425.875 4
 -9 -13 -2 2113.85 478.503 5
 -9 -13 -3 -84.7389 157.028 4
 -9 -13 -3 -67.2046 136.595 5
 -9 -13 -4 -26.4428 90.7202 4
 -9 -13 -4 67.2987 121.092 5
 -9 -13 -5 -22.5293 126.871 4
 -9 -13 -5 68.3966 130.277 5
 -9 -13 -6 832.049 331.818 4
 -9 -13 -6 541.724 239.923 5
 -9 -13 -7 133.963 165.213 4
 -9 -13 -7 331.707 194.932 5
 -9 -14 13 38.9363 73.6972 5
 9 14 -13 91.2995 147.542 2
 -9 -14 12 -13.2 62.7081 5
 9 14 -12 477.08 236 2
 9 14 -11 384.097 180.288 2
 -9 -14 11 261.482 153.835 5
 9 14 -10 477.503 209.318 2
 -9 -14 10 250.852 130.417 5
 -9 -14 9 114.616 154.399 5
 -9 -14 8 644.3 240.073 5
 -9 -14 7 1852.47 425.52 5
 -9 -14 6 82.0779 117.799 5
 -9 -14 5 54.4438 90.3708 5
 -9 -14 4 -281.098 170.735 5
 -9 -14 3 4445.68 679.534 5
 -9 -14 2 -229.804 201.186 5
 -9 -14 1 1202 367.79 5
 -9 -14 0 103.901 100.28 5
 -9 -14 0 26.967 89.3237 4
 -9 -14 -1 2073.41 462.094 4
 -9 -14 -1 2943.68 563.36 5
 -9 -14 -2 -16.1238 55.5351 4
 -9 -14 -2 205.374 162.961 5
 -9 -14 -3 338.421 218.995 4
 -9 -14 -3 254.674 183.777 5
 -9 -14 -4 73.0033 90.9728 4
 -9 -14 -4 276.406 206.435 5
 -9 -14 -5 553.579 264.59 4
 -9 -14 -5 160.516 143.773 5
 -9 -14 -6 -79.8958 120.468 4
 -9 -14 -6 -223.916 169.71 5
 -9 -14 -7 270.538 195.294 5
 9 15 -13 174.392 149.823 2
 -9 -15 12 158.777 127.508 5
 9 15 -12 164.211 143.594 2
 -9 -15 11 112.333 125.97 5
 9 15 -11 528.605 234.084 2
 9 15 -10 566.259 232.308 2
 -9 -15 10 101.293 107.552 5
 9 15 -9 268.118 163.728 2
 -9 -15 9 -102.572 141.818 5
 -9 -15 8 109.157 142.346 5
 -9 -15 7 247.726 158.763 5
 -9 -15 6 1419.6 377.088 5
 -9 -15 5 -78.1029 137.846 5
 -9 -15 4 -43.4987 87.6054 5
 -9 -15 3 246.228 175.334 5
 -9 -15 2 2716.46 545.893 5
 -9 -15 1 886.26 332.26 5
 -9 -15 0 83.365 100.861 5
 -9 -15 0 227.459 162.175 4
 -9 -15 -1 2177.55 488.388 4
 -9 -15 -1 2345.97 521.187 5
 -9 -15 -2 345.499 225.891 5
 -9 -15 -2 170.936 163.839 4
 -9 -15 -3 1295.92 398.665 4
 -9 -15 -3 735.108 312.733 5
 -9 -15 -4 218.224 198.639 4
 -9 -15 -4 19.4041 69.6284 5
 -9 -15 -5 86.6108 132.161 4
 -9 -15 -5 270.004 187.434 5
 -9 -15 -6 -77.1846 105.781 5
 -9 -15 -7 207.867 161.838 5
 -9 -16 12 -78.5284 92.6947 5
 9 16 -12 195.035 188.159 2
 -9 -16 11 260.537 157.163 5
 9 16 -11 599.702 256.687 2
 -9 -16 10 -96.3352 129.881 5
 9 16 -10 -26.9175 65.3905 2
 9 16 -9 36.0108 92.5039 2
 -9 -16 9 -136.529 133.106 5
 9 16 -8 501.046 201.379 2
 -9 -16 8 102.947 61.8395 5
 -9 -16 7 823.675 305.754 5
 -9 -16 6 90.2176 120.795 5
 -9 -16 5 -2.06644 121.167 5
 -9 -16 4 3299.31 609.053 5
 -9 -16 3 46.4653 162.316 5
 -9 -16 2 188.868 186.189 5
 -9 -16 1 -36.3209 118.119 5
 -9 -16 0 664.431 302.815 5
 -9 -16 0 423.222 215.56 4
 -9 -16 -1 88.6545 114.812 4
 -9 -16 -1 61.6593 169.1 5
 -9 -16 -2 -302.854 199.829 4
 -9 -16 -2 -39.0834 134.763 5
 -9 -16 -3 32.1047 106.783 4
 -9 -16 -3 -37.3675 100.051 5
 -9 -16 -4 226.682 202.975 4
 -9 -16 -4 396.381 217.692 5
 -9 -16 -5 78.5364 109.248 5
 -9 -16 -6 -140.184 146.432 5
 -9 -17 11 394.925 208.992 5
 9 17 -11 737.457 281.771 2
 -9 -17 10 45.7368 85.8895 5
 -9 -17 9 -105.001 115.386 5
 -9 -17 8 -81.5725 140.197 5
 -9 -17 7 589.516 261.567 5
 -9 -17 6 -185.129 176.332 5
 -9 -17 5 743.46 301.643 5
 -9 -17 4 586.529 257.946 5
 -9 -17 3 327.67 201.856 5
 -9 -17 2 3.88687 85.4347 5
 -9 -17 1 152.279 106.029 5
 -9 -17 0 20.8429 112.191 5
 -9 -17 0 -137.811 131.847 4
 -9 -17 -1 540.31 262.085 4
 -9 -17 -1 893.218 335.201 5
 -9 -17 -2 298.646 201.67 4
 -9 -17 -2 208.81 178.136 5
 -9 -17 -3 323.995 203.939 4
 -9 -17 -3 759.166 326.763 5
 9 -18 -9 141.791 156.675 3
 -9 -18 8 934.387 337.827 5
 9 -18 -8 1159.61 383.707 3
 -9 -18 7 211.673 151.668 5
 -9 -18 6 168.739 144.221 5
 -9 -18 5 622.46 281.362 5
 -9 -18 4 1097.74 389.33 5
 -9 -18 3 216.113 173.327 5
 -9 -18 2 256.196 195.704 5
 -9 -18 0 281.06 181.05 4
 -9 -18 -1 188.289 165.191 4
 -9 -18 -2 455.908 260.008 4
 -9 -19 0 487.102 259.114 4
 -9 -19 -1 74.9265 82.7044 4
 10 0 -18 -102.673 108.2 2
 10 0 -17 40.2169 78.2984 2
 -10 0 16 102.589 81.0386 5
 -10 0 15 -26.2831 73.4445 5
 -10 0 14 264.705 120.38 5
 -10 0 13 -35.7297 53.0513 5
 -10 0 12 1928.06 312.244 5
 -10 0 11 156.873 131.707 5
 -10 0 10 12844 777.239 5
 -10 0 9 21.3706 60.1427 5
 -10 0 8 7144.19 564.274 5
 -10 0 7 -5.60234 49.1382 5
 -10 0 6 8230.16 588.012 5
 -10 0 5 81.7588 63.8285 5
 -10 0 4 1977.3 275.498 5
 -10 0 3 87.9376 84.4559 5
 -10 0 2 14695 733.351 5
 -10 0 1 31.9322 49.3859 5
 -10 0 0 1845.67 249.151 5
 -10 0 -1 -19.5096 54.5978 5
 -10 0 -2 953.175 176.852 5
 -10 0 -3 7.15811 42.2398 5
 10 0 4 621.205 198.604 1
 -10 0 -4 1009.26 170.101 5
 10 0 5 -92.3371 148.756 1
 10 0 6 323.539 145.211 1
 10 0 7 28.163 99.7674 1
 10 0 8 -320.152 171.691 1
 10 0 9 -107.48 145.098 1
 10 0 10 722.605 274.429 1
 10 0 11 -170.982 139.317 1
 10 -1 -19 179.525 143.078 2
 10 1 -18 11.7219 89.1453 2
 10 -1 -18 67.6594 108.766 2
 -10 -1 17 424.473 174.53 5
 10 1 -17 54.4655 56.0036 2
 10 -1 -17 470.344 220.314 2
 -10 1 16 430.289 162.23 5
 -10 -1 16 33.5491 52.9596 5
 -10 1 15 367.802 147.592 5
 -10 -1 15 394.693 147.006 5
 -10 1 14 -13.4211 60.8376 5
 -10 -1 14 60.2033 78.1013 5
 -10 1 13 1785.87 316.997 5
 -10 -1 13 1974.58 321.13 5
 -10 1 12 1687.58 288.112 5
 -10 -1 12 1735.33 295.757 5
 -10 1 11 328.826 115.773 5
 -10 -1 11 651.645 165.868 5
 -10 1 10 468.124 139.64 5
 -10 -1 10 354.294 138.347 5
 -10 1 9 4401.39 446.462 5
 -10 -1 9 3444.67 391.788 5
 -10 1 8 4917.56 456.451 5
 -10 -1 8 4930.09 469.925 5
 -10 1 7 705.487 166.296 5
 -10 -1 7 534.541 152.735 5
 -10 1 6 53.1618 45.2063 5
 -10 -1 6 132.391 91.8687 5
 -10 1 5 914.767 192.279 5
 -10 -1 5 1187.89 220.77 5
 -10 1 4 10759.3 636.448 5
 -10 -1 4 11023.2 666.125 5
 -10 1 3 450.806 127.46 5
 -10 -1 3 361.903 131.07 5
 -10 1 2 988.66 182.168 5
 -10 -1 2 955.823 192.437 5
 -10 1 1 2976.28 317.444 5
 -10 -1 1 2351.66 302.2 5
 -10 1 0 471.753 121.2 5
 -10 -1 0 103.431 33.9458 5
 -10 1 -1 443.648 123.113 5
 -10 -1 -1 182.19 86.5963 5
 -10 1 -2 410.895 109.578 5
 -10 -1 -2 451.435 131.142 5
 -10 1 -3 3145.87 302.074 5
 -10 -1 -3 3908.99 366.116 5
 10 1 3 3615.23 474.773 1
 -10 1 -4 10.1139 31.222 5
 -10 -1 -4 46.5767 37.4482 5
 10 1 5 -349.607 161.992 1
 10 -1 6 254.442 159.291 1
 10 1 6 277.554 145.645 1
 10 1 7 940.162 280.596 1
 10 -1 7 792.914 249.422 1
 10 1 8 83.3318 82.7476 1
 10 -1 8 -35.1049 74.103 1
 10 1 9 -86.3514 126.525 1
 10 -1 9 -127.662 115.358 1
 10 -1 10 110.394 98.8369 1
 10 1 10 359.512 208.449 1
 10 -1 11 51.9965 120.297 1
 10 1 11 -45.7873 78.2071 1
 10 -2 -19 231.498 165.786 2
 10 -2 -18 2.42402 37.9178 2
 10 2 -18 259.292 189.039 2
 -10 -2 17 -76.2187 76.4622 5
 10 2 -17 241.994 186.901 2
 10 -2 -17 139.471 139.107 2
 -10 -2 16 178.74 109.901 5
 -10 -2 15 455.099 163.961 5
 -10 2 14 240.605 128.926 5
 -10 -2 14 257.575 125.664 5
 -10 2 13 1330.6 274.031 5
 -10 -2 13 1172.34 247.915 5
 -10 2 12 462.183 168.303 5
 -10 -2 12 357.105 138.075 5
 -10 2 11 10.4593 60.413 5
 -10 -2 11 -66.2311 68.3486 5
 -10 -2 10 2512.82 346.029 5
 -10 2 10 2157.48 323.611 5
 -10 2 9 4136.48 431.6 5
 -10 -2 9 4117.96 440.041 5
 -10 2 8 3489.38 393.87 5
 -10 -2 8 2729.31 354.607 5
 -10 2 7 170.554 84.1247 5
 -10 -2 7 401.487 114.233 5
 -10 2 6 145.127 88.444 5
 -10 -2 6 -223.864 102.93 5
 -10 2 5 4694.34 428.379 5
 -10 -2 5 5378.52 488.482 5
 -10 2 4 7689.86 530.688 5
 -10 -2 4 7407.15 570.576 5
 -10 2 3 990.269 182.367 5
 -10 -2 3 1349.59 229.727 5
 -10 2 2 677.899 147.368 5
 -10 -2 2 796.121 192.626 5
 -10 2 1 3971 359.943 5
 -10 -2 1 4026.42 410.214 5
 10 2 0 163.325 115.416 1
 -10 2 0 273.332 85.1145 5
 -10 -2 0 388.561 117.771 5
 -10 2 -1 11.6422 20.8841 5
 -10 -2 -1 -30.2752 82.0594 5
 10 2 1 -49.9369 65.0471 1
 -10 2 -2 6.59338 21.9864 5
 -10 -2 -2 -51.021 75.1259 5
 10 2 2 -20.3923 66.6967 1
 -10 2 -3 21.1952 36.2744 5
 -10 -2 -3 -82.9487 69.1224 5
 10 2 3 -62.7466 92.2054 1
 -10 -2 -4 154.559 81.261 5
 10 2 4 -28.0598 93.7401 1
 10 2 5 -15.2883 99.1152 1
 10 2 6 4635.24 596.316 1
 10 2 7 414.671 143.811 1
 10 -2 7 583.615 234.388 1
 10 2 8 626.728 241.45 1
 10 -2 8 859.508 274.87 1
 10 2 9 -30.0585 112.573 1
 10 -2 9 205.188 154.317 1
 -10 -2 -9 192.856 177.528 4
 10 2 10 -202.487 158.481 1
 -10 -2 -10 65.6518 101.245 4
 10 -2 10 -238.162 155.203 1
 10 2 11 259.794 180.743 1
 10 -2 11 419.633 231.274 1
 -10 -2 -11 799.113 307.376 4
 10 -3 -18 195.749 146.224 2
 10 3 -17 26.5753 72.697 2
 10 -3 -17 21.9684 69.5221 2
 -10 -3 16 -57.0554 78.3896 5
 -10 -3 15 78.3488 78.1776 5
 -10 -3 14 256.337 113.954 5
 -10 3 13 726.18 211.778 5
 -10 -3 13 650.389 185.731 5
 -10 3 12 1683.53 310.452 5
 -10 -3 12 1124.67 240.231 5
 -10 3 11 214.131 117.845 5
 -10 -3 11 330.093 146.539 5
 -10 3 10 206.359 78.3742 5
 -10 -3 10 600.545 177.044 5
 -10 3 9 128.894 80.7174 5
 -10 -3 9 15.5761 80.3105 5
 -10 3 8 696.141 174.16 5
 -10 -3 8 375.524 131.211 5
 10 3 -8 544.878 98.8499 1
 -10 3 7 258.677 105.689 5
 -10 -3 7 219.068 81.3164 5
 10 3 -7 333.237 82.2651 1
 -10 3 6 649.311 174.158 5
 -10 -3 6 850.805 195.248 5
 10 3 -6 1101.31 173.847 1
 -10 3 5 13627.7 735.584 5
 -10 -3 5 14194.7 812.933 5
 10 3 -5 12419.6 621.843 1
 -10 3 4 656.816 169.23 5
 -10 -3 4 797.772 203.3 5
 -10 3 3 1067.89 193.893 5
 -10 -3 3 1476.5 263.43 5
 -10 3 2 145.742 80.1386 5
 -10 -3 2 19.6469 70.9179 5
 10 3 -2 33.023 40.4678 1
 -10 3 1 100.851 66.5546 5
 -10 -3 1 186.304 101.584 5
 10 3 -1 194.203 81.6233 1
 -10 3 0 6296.94 447.653 5
 -10 -3 0 6731.41 552.297 5
 10 3 0 6700.69 574.422 1
 -10 3 -1 312.55 96.912 5
 -10 -3 -1 224.577 105.088 5
 10 3 1 401.907 134.283 1
 -10 3 -2 2.71152 33.2391 5
 -10 -3 -2 7.50305 40.4236 5
 10 3 2 -36.3643 97.9883 1
 -10 3 -3 3367.9 300.179 5
 -10 -3 -3 4014.61 418.816 5
 10 3 3 3596.43 469.58 1
 10 3 4 2330.74 395.534 1
 -10 -3 -4 1919.75 289.974 5
 10 3 5 156.448 120.132 1
 -10 -3 -5 141.104 93.2629 5
 10 3 6 -7.172 79.5714 1
 -10 -3 -6 107.437 138.516 4
 10 3 7 1107.8 309.517 1
 -10 -3 -7 1508.13 380.761 4
 10 -3 8 176.016 143.614 1
 10 3 8 26.3083 113.15 1
 -10 -3 -8 190.079 157.617 4
 10 -3 9 -60.3917 83.4396 1
 -10 -3 -9 -62.7954 91.3376 4
 10 3 9 -105.936 117.868 1
 10 3 10 621.48 243.144 1
 10 -3 10 214.19 161.723 1
 -10 -3 -10 133.199 134.747 4
 10 -3 11 96.6303 138.298 1
 -10 -3 -11 208.394 150.865 4
 10 -4 -18 224.658 138.293 2
 10 4 -17 453.787 225.451 2
 10 -4 -17 473.941 194.846 2
 -10 -4 16 13.0612 43.7261 5
 -10 -4 15 151.636 107.105 5
 -10 -4 14 -61.3984 74.3657 5
 -10 -4 13 -99.9515 102.771 5
 -10 4 12 300.013 132.123 5
 -10 -4 12 421.29 136.235 5
 -10 4 11 1305.77 274.128 5
 -10 -4 11 886.416 221.268 5
 -10 4 10 48.6069 69.3103 5
 -10 -4 10 71.595 56.2523 5
 -10 4 9 20.4511 66.6241 5
 -10 -4 9 61.0046 40.9547 5
 -10 4 8 1998.41 306.377 5
 -10 -4 8 1955.19 315.612 5
 -10 4 7 9805.16 669.734 5
 -10 -4 7 10465.3 721.218 5
 10 4 -7 10081.3 460.59 1
 -10 4 6 855.966 189.827 5
 10 4 -6 985.916 159.415 1
 -10 -4 6 1050.46 242.641 5
 10 4 -5 142.672 60.1755 1
 -10 4 5 144.368 88.1019 5
 -10 4 4 100.347 76.0195 5
 -10 -4 4 148.351 75.9391 5
 -10 4 3 1742.15 253.709 5
 -10 -4 3 1300.45 255.045 5
 -10 4 2 158.431 81.8713 5
 -10 -4 2 213.001 106.819 5
 10 4 -2 87.9632 64.8476 1
 10 4 -1 1573.8 265.843 1
 -10 4 1 1898.21 253.651 5
 -10 -4 1 1843.68 303.394 5
 10 4 0 385.716 138.563 1
 -10 4 0 178.647 66.6404 5
 -10 -4 0 564.138 173.532 5
 -10 4 -1 15486.8 695.718 5
 -10 -4 -1 14848.7 860.666 5
 10 4 1 15465.6 912.853 1
 -10 4 -2 93.3754 80.0684 5
 10 4 2 69.5519 67.0923 1
 -10 -4 -2 65.8349 66.9074 5
 -10 4 -3 330.697 95.7287 5
 10 4 3 380.461 137.915 1
 -10 -4 -3 312.52 142.581 5
 10 4 4 999.81 259.091 1
 -10 -4 -4 731.578 188.824 5
 -10 -4 -5 4564.86 463.389 5
 10 4 5 5125.98 608.862 1
 -10 -4 -5 5305.88 690.724 4
 10 4 6 220.632 141.043 1
 -10 -4 -6 368.478 190.461 4
 10 4 7 171.632 118.564 1
 -10 -4 -7 -29.8113 114.096 4
 10 4 8 72.8503 78.0854 1
 -10 -4 -8 56.4048 124.118 4
 -10 -4 -9 292.208 170.612 4
 10 4 9 359.944 173.915 1
 10 -4 9 792.07 277.064 1
 -10 -4 -10 108.493 120.778 4
 10 -4 10 184.097 153.856 1
 10 4 10 258.861 164.848 1
 -10 -4 -11 656.007 274.395 4
 10 -4 11 -141.182 128.669 1
 -10 -4 -12 265.188 214.089 4
 10 5 -17 -70.7284 100.302 2
 10 5 -16 899.375 300.007 2
 -10 -5 16 535.316 178.287 5
 -10 -5 15 115.938 94.9938 5
 -10 -5 14 3584.79 441.845 5
 -10 -5 13 1331.5 264.235 5
 -10 -5 12 20.2703 37.4109 5
 -10 -5 11 299.49 131.698 5
 -10 5 10 4210.36 492.446 5
 -10 -5 10 3705.8 437.74 5
 -10 5 9 3197.89 418.34 5
 -10 -5 9 3090.77 403.587 5
 -10 5 8 368.051 125.364 5
 -10 -5 8 740.856 209.819 5
 10 5 -7 546.047 102.524 1
 -10 5 7 466.416 138.763 5
 -10 -5 7 612.302 185.237 5
 -10 5 6 1061.11 221.738 5
 10 5 -6 981.579 154.855 1
 -10 -5 6 988.141 249.025 5
 -10 5 5 -14.3787 93.0194 5
 -10 -5 5 123.93 57.8556 5
 10 5 -5 -12.5067 40.6564 1
 -10 5 4 3300.96 372.6 5
 -10 -5 4 4066.43 473.422 5
 -10 5 3 189.966 95.271 5
 -10 -5 3 59.6085 59.1636 5
 -10 5 2 4680.75 427.85 5
 -10 -5 2 5544.06 558.972 5
 10 5 -2 5401.49 480.666 1
 -10 5 1 185.459 91.5443 5
 -10 -5 1 230.325 115.22 5
 10 5 -1 239.668 97.3526 1
 -10 5 0 466.548 131.931 5
 -10 -5 0 145.53 89.9381 5
 10 5 0 336.196 114.906 1
 -10 5 -1 1242.83 210.083 5
 -10 -5 -1 956.646 234.285 5
 10 5 1 1173.73 256.364 1
 -10 5 -2 10170.1 567.222 5
 -10 -5 -2 9951.77 742.578 5
 10 5 2 10298.5 782.076 1
 -10 -5 -3 565.498 185.715 5
 10 5 3 358.625 162.666 1
 -10 -5 -4 544.685 176.644 5
 10 5 4 440.493 177.774 1
 -10 -5 -4 573.123 230.979 4
 -10 -5 -5 208.13 96.7853 5
 10 5 5 569.191 214.418 1
 -10 -5 -5 423.205 179.032 4
 10 5 6 512.023 194.196 1
 -10 -5 -6 760.507 276.75 4
 -10 -5 -7 145.759 151.535 4
 10 5 7 169.591 117.839 1
 -10 -5 -8 1531.19 419.701 4
 10 5 8 1771.8 379.202 1
 -10 -5 -9 77.9584 142.304 4
 10 5 9 287.451 180.305 1
 -10 -5 -10 -33.7122 79.0978 4
 10 5 10 36.5597 101.026 1
 -10 -5 -11 628.819 285.989 4
 10 -5 11 296.989 214.305 1
 10 6 -16 194.866 137.39 2
 -10 -6 16 42.8421 67.3076 5
 -10 -6 15 1264.39 269.644 5
 -10 -6 14 1207.06 265.12 5
 -10 -6 13 214.857 117.55 5
 -10 -6 12 106.745 92.7363 5
 -10 -6 11 168.209 118.134 5
 -10 -6 10 1852.57 322.235 5
 -10 -6 9 1690.99 307.464 5
 -10 -6 8 1636.17 304.506 5
 -10 6 7 1545.12 266.615 5
 -10 -6 7 1978.11 336.611 5
 -10 6 6 1039.5 216.634 5
 -10 -6 6 1307.5 282.513 5
 10 6 -6 1519.26 192.877 1
 -10 6 5 142.397 56.2227 5
 10 6 -5 146.114 65.2514 1
 -10 -6 5 269.483 132.029 5
 -10 6 4 684.327 177.922 5
 -10 -6 4 1151.33 261.381 5
 -10 6 3 2867.29 349.635 5
 -10 -6 3 3326.32 446.142 5
 -10 6 2 585.2 156.834 5
 10 6 -2 463.329 137.67 1
 -10 -6 2 137.891 89.9433 5
 -10 6 1 104.232 98.1078 5
 10 6 -1 162.756 117.954 1
 -10 -6 1 118.496 86.314 5
 10 6 0 1581.83 278.557 1
 -10 -6 0 1554.43 309.782 5
 10 6 1 1073.76 244.868 1
 -10 -6 -1 1165.27 279.577 5
 -10 -6 -2 9326.89 751.3 5
 10 6 2 7875.85 685.914 1
 10 6 3 353.934 148.009 1
 -10 -6 -3 471.615 168.936 5
 -10 -6 -3 27.1303 71.1983 4
 10 6 4 189.086 126.258 1
 -10 -6 -4 0.18483 75.6536 5
 -10 -6 -4 238.842 187.673 4
 -10 -6 -5 225.362 204.495 4
 10 6 5 272.096 172.986 1
 -10 -6 -5 460.469 164.068 5
 -10 -6 -6 391.604 226.939 4
 10 6 6 225.096 116.136 1
 10 6 7 317.151 167.908 1
 -10 -6 -7 427.088 217.868 4
 -10 -6 -8 -16.5898 94.0126 4
 10 6 8 61.5451 62.1949 1
 -10 -6 -9 626.073 247.568 4
 10 6 9 790.156 264.583 1
 -10 -6 -10 -160.477 154.542 4
 10 -6 10 87.4836 102.327 1
 10 6 10 58.585 110.874 1
 -10 -6 -11 46.0083 95.3435 4
 10 7 -16 1450.01 392.826 2
 -10 -7 15 128.336 88.1373 5
 -10 -7 14 323.745 142.893 5
 -10 -7 13 497.051 169.977 5
 -10 -7 12 1737.92 321.139 5
 -10 -7 11 2360.05 371.248 5
 -10 -7 10 110.691 115.483 5
 -10 -7 9 163.358 113.613 5
 -10 -7 8 -90.0928 133.545 5
 -10 -7 7 184.019 108.691 5
 -10 -7 6 2180.25 370.071 5
 -10 -7 5 1436.64 312.618 5
 -10 -7 4 187.443 67.6545 5
 -10 -7 3 51.6466 99.1116 5
 10 7 -3 25.6078 42.9914 1
 10 7 -2 2417.17 319.212 1
 -10 -7 2 2023.1 360.943 5
 -10 -7 1 4634.96 558.617 5
 10 7 -1 4508.51 459.047 1
 -10 -7 0 1398.08 315.435 5
 10 7 0 1817.66 304.779 1
 -10 -7 -1 22.39 89.3699 5
 10 7 1 32.6927 80.5554 1
 -10 -7 -2 45.4141 60.9882 5
 10 7 2 226.699 133.578 1
 -10 -7 -3 304.695 134.247 5
 -10 -7 -3 372.197 177.279 4
 10 7 3 323.267 144.492 1
 10 7 4 1396.59 302.041 1
 -10 -7 -4 1439.3 312.285 5
 -10 -7 -4 804.139 297.335 4
 -10 -7 -5 894.597 300.967 4
 10 7 5 1134.13 293.758 1
 -10 -7 -5 1181.27 271.848 5
 -10 -7 -6 297.704 243.158 4
 -10 -7 -6 192.602 124.492 5
 10 7 6 -8.16964 62.1131 1
 -10 -7 -7 -54.9925 69.9695 4
 10 7 7 -88.185 47.7064 1
 -10 -7 -8 -68.2066 155.231 4
 10 7 8 170.787 115.545 1
 -10 -7 -9 -7.37118 65.7172 4
 10 7 9 8.15186 54.8573 1
 -10 -7 -10 -190.121 169.633 4
 10 8 -16 96.2957 120.63 2
 10 8 -15 403.968 228.705 2
 -10 -8 15 160.649 106.638 5
 -10 -8 14 73.2749 85.3017 5
 -10 -8 13 102.457 95.7287 5
 -10 -8 12 -34.5377 74.4642 5
 -10 -8 11 434.12 164.039 5
 -10 -8 10 102.356 106.572 5
 -10 -8 9 1208.5 283.166 5
 -10 -8 8 11.9697 50.3881 5
 -10 -8 7 6430.33 649.17 5
 -10 -8 6 962.372 248.917 5
 -10 -8 5 1697.66 329.341 5
 -10 -8 4 3875.75 521.267 5
 -10 -8 3 506.319 169.636 5
 -10 -8 2 1501.91 330.713 5
 10 8 -1 1812.16 298.166 1
 -10 -8 1 1869.3 363.836 5
 -10 -8 0 9243.8 802.831 5
 10 8 0 9025.36 682.311 1
 -10 -8 -1 806.382 251.068 5
 10 8 1 672.083 202.001 1
 -10 -8 -2 6411.06 676.355 5
 10 8 2 6931.4 642.079 1
 -10 -8 -2 6148.92 759.965 4
 -10 -8 -3 199.263 123.53 5
 10 8 3 165.115 111.246 1
 -10 -8 -3 408.913 214.279 4
 -10 -8 -4 88.0405 105.179 4
 -10 -8 -4 15.5821 66.0848 5
 10 8 4 28.2968 75.5818 1
 -10 -8 -5 489.684 245.241 4
 10 8 5 279.82 133.955 1
 -10 -8 -5 481.907 187.869 5
 10 8 6 90.9368 95.3667 1
 -10 -8 -6 196.402 127.399 5
 -10 -8 -7 11.3393 96.4808 4
 -10 -8 -8 815.893 313.852 4
 -10 -8 -9 192.277 139.772 4
 10 9 -15 261.759 153.754 2
 -10 -9 15 257.862 137.387 5
 -10 -9 14 152.516 110.11 5
 -10 -9 13 -265.012 133.229 5
 -10 -9 12 565.233 192.796 5
 -10 -9 11 16.7143 63.6944 5
 -10 -9 10 1193.54 289.847 5
 -10 -9 9 3514.96 491.086 5
 -10 -9 8 2813.81 439.004 5
 -10 -9 7 356.416 168.067 5
 -10 -9 6 2787.06 454.545 5
 -10 -9 5 668.116 213.846 5
 -10 -9 4 264.712 91.5199 5
 -10 -9 3 499.853 168.522 5
 -10 -9 2 32.048 112.18 5
 -10 -9 1 -20.8687 81.9023 5
 -10 -9 0 687.096 235.661 5
 -10 -9 -1 707.583 235.971 5
 -10 -9 -2 -47.7864 71.0285 5
 -10 -9 -2 -25.1721 68.1864 4
 -10 -9 -3 713.39 260.538 4
 -10 -9 -3 710.852 233.572 5
 -10 -9 -4 81.3978 105.295 4
 -10 -9 -4 104.903 125.642 5
 -10 -9 -5 -78.2794 130.536 4
 -10 -9 -5 28.0371 96.8882 5
 -10 -9 -6 283.567 142.211 4
 -10 -9 -6 908.568 264.679 5
 -10 -9 -7 61.3227 119.839 4
 -10 -9 -8 455.98 264.671 4
 -10 -9 -9 133.576 177.339 4
 10 10 -15 71.7367 105.504 2
 10 10 -14 106.087 59.7221 2
 -10 -10 14 -32.2808 91.222 5
 -10 -10 13 -104.207 107.688 5
 -10 -10 12 522.815 195.402 5
 -10 -10 11 12.3449 49.7647 5
 -10 -10 10 8.89929 68.7701 5
 -10 -10 9 10.4116 92.0767 5
 -10 -10 8 359.978 157.182 5
 -10 -10 7 557.031 216.042 5
 -10 -10 6 3228.74 496.831 5
 -10 -10 5 49.3083 85.5407 5
 -10 -10 4 -96.3736 135.082 5
 -10 -10 3 49.7537 62.7861 5
 -10 -10 2 1285.08 328.064 5
 -10 -10 1 397.981 206.562 5
 -10 -10 0 1959.7 403.536 5
 -10 -10 -1 1308.92 331.224 5
 -10 -10 -1 1499.32 367.454 4
 -10 -10 -2 270.164 147.798 5
 -10 -10 -2 93.2209 91.6623 4
 -10 -10 -3 441.726 224.281 4
 -10 -10 -3 157.726 105.839 5
 -10 -10 -4 2431.79 516.341 4
 -10 -10 -4 2856.08 493.073 5
 -10 -10 -5 1032.22 347.432 4
 -10 -10 -5 903.33 277.443 5
 -10 -10 -6 633.989 285.976 4
 -10 -10 -6 870.024 274.567 5
 -10 -10 -7 394.646 221.928 4
 -10 -10 -8 115.942 149.287 4
 10 11 -14 67.7521 124.893 2
 -10 -11 14 56.4677 42.3431 5
 -10 -11 13 95.4757 93.3308 5
 -10 -11 12 66.7649 84.1663 5
 -10 -11 11 38.4025 97.7052 5
 -10 -11 10 708.444 236.009 5
 -10 -11 9 804.035 254.024 5
 -10 -11 8 113.731 122.556 5
 -10 -11 7 1049.32 292.916 5
 -10 -11 6 -92.4229 143.965 5
 -10 -11 5 2107.17 416.457 5
 -10 -11 4 42.9536 130.888 5
 -10 -11 3 1477.49 364.104 5
 -10 -11 2 486.072 216.58 5
 -10 -11 1 5739.74 705.961 5
 -10 -11 0 830.383 271.739 5
 -10 -11 -1 29.8988 105.603 5
 -10 -11 -1 127.475 148.764 4
 -10 -11 -2 97.1871 138.579 5
 -10 -11 -2 -35.4052 96.3329 4
 -10 -11 -3 1683.09 427.223 4
 -10 -11 -3 1412.48 365.587 5
 -10 -11 -4 1122.37 363.372 4
 -10 -11 -4 1154.17 326.585 5
 -10 -11 -5 -85.3568 89.5075 4
 -10 -11 -5 86.1455 100.775 5
 -10 -11 -6 317.81 187.32 4
 -10 -11 -6 38.3053 70.174 5
 -10 -11 -7 394.515 227.661 4
 10 12 -14 409.268 228.516 2
 -10 -12 14 244.254 135.537 5
 10 12 -13 257.693 159.512 2
 -10 -12 13 187.507 122.465 5
 -10 -12 12 669.919 239.249 5
 -10 -12 11 112.858 105.198 5
 -10 -12 10 114.449 128.542 5
 -10 -12 9 98.3244 112.69 5
 -10 -12 8 646.117 231.838 5
 -10 -12 7 253.113 182.312 5
 -10 -12 6 337.935 139.712 5
 -10 -12 5 15.6615 83.9414 5
 -10 -12 4 -76.9359 127.152 5
 -10 -12 3 -83.4949 66.4021 5
 -10 -12 2 800.72 283.625 5
 -10 -12 1 119.322 169.413 5
 -10 -12 0 49.2894 62.8219 5
 -10 -12 -1 106.945 135.307 5
 -10 -12 -1 -33.6158 125.3 4
 -10 -12 -2 513.232 236.698 5
 -10 -12 -2 206.068 176.827 4
 -10 -12 -3 360.462 254.958 4
 -10 -12 -3 -17.3143 58.0817 5
 -10 -12 -4 159.04 136.921 4
 -10 -12 -4 114.207 131.283 5
 -10 -12 -5 721.971 315.512 4
 -10 -12 -5 525.6 235.491 5
 -10 -12 -6 -24.285 132.143 4
 -10 -12 -6 316.83 184.884 5
 -10 -12 -7 3.45758 61.3664 4
 10 13 -13 -118.199 116.832 2
 -10 -13 13 -22.2664 55.8198 5
 10 13 -12 132.47 122.94 2
 -10 -13 12 238.656 165.569 5
 -10 -13 11 -151.632 121.642 5
 -10 -13 10 -262.148 158.167 5
 -10 -13 9 329.493 159.66 5
 -10 -13 8 244.165 171.35 5
 -10 -13 7 -168.288 157.891 5
 -10 -13 6 84.0194 121.959 5
 -10 -13 5 556.865 243.876 5
 -10 -13 4 -143.366 161.002 5
 -10 -13 3 462.939 216.221 5
 -10 -13 2 192.284 201.564 5
 -10 -13 1 2982.11 542.116 5
 -10 -13 0 784.445 298.997 5
 -10 -13 -1 -65.0741 152.825 5
 -10 -13 -1 403.331 216.894 4
 -10 -13 -2 683.792 285.01 4
 -10 -13 -2 832.379 292.233 5
 -10 -13 -3 1046.7 359.9 4
 -10 -13 -3 1023.73 323.847 5
 -10 -13 -4 -287.448 194.486 4
 -10 -13 -4 27.3475 93.2511 5
 -10 -13 -5 418.291 231.911 4
 -10 -13 -5 294.799 187.94 5
 -10 -13 -6 9.01136 103.587 4
 -10 -13 -6 58.974 65.8065 5
 -10 -14 13 -136.97 114.892 5
 10 14 -13 54.6807 89.7898 2
 10 14 -12 153.914 121.344 2
 -10 -14 12 9.29823 54.8058 5
 10 14 -11 -110.136 112.308 2
 -10 -14 11 -32.7857 115.988 5
 -10 -14 10 -18.9909 81.0705 5
 -10 -14 9 222.115 135.756 5
 -10 -14 8 101.869 82.0409 5
 -10 -14 7 367.431 177.844 5
 -10 -14 6 1828.08 418.867 5
 -10 -14 5 648.675 267.281 5
 -10 -14 4 -59.9572 51.2801 5
 -10 -14 3 196.787 135.065 5
 -10 -14 2 2132.11 478.625 5
 -10 -14 1 411.322 228.574 5
 -10 -14 0 1115.45 356.483 5
 -10 -14 -1 294.429 174.375 5
 -10 -14 -1 134.169 101.356 4
 -10 -14 -2 2527.39 532.371 4
 -10 -14 -2 2072.65 481.579 5
 -10 -14 -3 59.4279 84.1524 4
 -10 -14 -3 89.8028 115.5 5
 -10 -14 -4 48.4479 100.674 4
 -10 -14 -4 9.55821 69.5619 5
 -10 -14 -5 1166.6 388.259 4
 -10 -14 -5 687.011 290.029 5
 -10 -14 -6 362.171 223.456 5
 -10 -15 12 246.05 163.534 5
 10 15 -12 34.0071 69.8494 2
 10 15 -11 28.4764 129.107 2
 -10 -15 11 303.269 173.563 5
 10 15 -10 194.234 159.143 2
 -10 -15 10 -50.7947 106.047 5
 -10 -15 9 197.675 143.649 5
 -10 -15 8 15.3047 109.094 5
 -10 -15 7 -5.19585 118.669 5
 -10 -15 6 270.695 153.149 5
 -10 -15 5 731.601 275.522 5
 -10 -15 4 563.857 245.597 5
 -10 -15 3 175.911 170.014 5
 -10 -15 2 431.894 245.781 5
 -10 -15 1 215.932 174.179 5
 -10 -15 0 100.042 110.474 5
 -10 -15 -1 151.512 169.529 5
 -10 -15 -1 101.097 79.441 4
 -10 -15 -2 278.981 171.375 4
 -10 -15 -2 -116.955 171 5
 -10 -15 -3 505.773 268.843 4
 -10 -15 -3 1047.24 358.759 5
 -10 -15 -4 -36.6489 124.651 4
 -10 -15 -4 60.3232 100.071 5
 -10 -15 -5 46.4318 141.856 5
 -10 -15 -6 336.77 216.339 5
 -10 -16 12 66.5853 157.269 5
 10 16 -12 363.159 220.384 2
 -10 -16 11 229.788 154.585 5
 10 16 -11 508.126 224.509 2
 10 16 -10 108.426 106.47 2
 -10 -16 10 258.196 167.834 5
 10 16 -9 -55.8858 79.8126 2
 -10 -16 9 -32.1052 132.363 5
 -10 -16 8 95.9263 111.056 5
 -10 -16 7 287.789 197.21 5
 -10 -16 6 1620.35 417.542 5
 -10 -16 5 -33.4465 136.484 5
 -10 -16 4 137.066 74.3523 5
 -10 -16 3 763.145 296.207 5
 -10 -16 2 428.157 224.321 5
 -10 -16 1 179.37 171.096 5
 -10 -16 0 22.2802 177.946 5
 -10 -16 -1 926.535 347.477 5
 -10 -16 -1 477.867 281.917 4
 -10 -16 -2 2.36139 92.715 5
 -10 -16 -2 264.63 200.057 4
 -10 -16 -3 141.924 142.655 4
 -10 -16 -3 -25.0256 83.3585 5
 -10 -16 -4 98.1677 107.09 5
 -10 -17 9 95.9468 103.891 5
 -10 -17 8 191.016 122.438 5
 -10 -17 7 -139.172 137.004 5
 -10 -17 6 433.984 230.537 5
 -10 -17 5 -7.53744 55.1937 5
 -10 -17 4 1497.65 440.566 5
 -10 -17 3 747.533 301.844 5
 -10 -17 2 437.58 253.56 5
 -10 -17 1 -129.352 139.781 5
 -10 -17 0 411.188 266.507 5
 -10 -17 -1 225.848 174.769 4
 -10 -17 -2 192.704 184.662 4
 -10 -18 -1 1160.95 402.517 4
 11 0 -18 54.0947 60.9774 2
 -11 0 17 91.519 85.8225 5
 -11 0 16 11.4925 66.8874 5
 -11 0 15 154.173 109.93 5
 -11 0 14 -120.211 108.43 5
 -11 0 13 72.2251 72.3235 5
 -11 0 12 45.1031 79.4652 5
 -11 0 11 313.476 140.142 5
 -11 0 10 16.5706 75.4875 5
 -11 0 9 1503.06 277.042 5
 -11 0 8 -16.1988 67.8894 5
 -11 0 7 3926.78 435.76 5
 -11 0 6 80.8365 67.6233 5
 -11 0 5 250.254 99.9735 5
 -11 0 4 -52.6235 55.2626 5
 -11 0 3 27950.5 1070.14 5
 -11 0 2 -40.6778 91.4685 5
 -11 0 1 612.61 153.106 5
 -11 0 0 -34.4527 61.328 5
 -11 0 -1 287.211 103.032 5
 -11 0 -2 4.4685 45.023 5
 -11 0 -3 934.258 182.019 5
 11 0 4 -110.319 110.04 1
 11 0 5 3182.04 501.709 1
 11 0 6 180.766 130.036 1
 11 0 7 585.456 215.281 1
 11 0 8 33.9666 68.3562 1
 11 0 9 103.558 61.2466 1
 11 0 10 -252.691 166.966 1
 11 1 -18 11.5334 66.9413 2
 11 -1 -18 -146.017 126.768 2
 -11 -1 17 52.3465 82.1888 5
 -11 1 16 440.879 186.453 5
 -11 -1 16 356.779 154.561 5
 -11 1 15 -87.305 115.528 5
 -11 -1 15 121.794 77.7066 5
 -11 1 14 288.584 132.093 5
 -11 -1 14 293.259 135.756 5
 -11 1 13 48.3979 87.1673 5
 -11 -1 13 0.34429 43.3384 5
 -11 1 12 572.938 188.612 5
 -11 -1 12 560.469 169.533 5
 -11 1 11 1120.44 242.978 5
 -11 -1 11 800.323 189.591 5
 -11 1 10 699.055 189.827 5
 -11 -1 10 878.47 212.646 5
 -11 1 9 422.481 150.329 5
 -11 -1 9 674.427 187.81 5
 -11 1 8 2221 321.185 5
 -11 -1 8 2037.73 311.185 5
 -11 1 7 2084.99 305.312 5
 -11 -1 7 1833.08 291.97 5
 -11 1 6 1160.9 224.983 5
 -11 -1 6 1432.66 252.668 5
 -11 1 5 3231.63 368.614 5
 -11 -1 5 3549.34 397.171 5
 -11 1 4 7830 572.385 5
 -11 -1 4 7851.71 589.956 5
 -11 1 3 384.56 129.6 5
 -11 -1 3 337.173 109.326 5
 -11 1 2 141.958 86.3742 5
 -11 -1 2 -44.4205 93.9408 5
 -11 1 1 38.3366 52.2538 5
 -11 -1 1 27.5407 42.6688 5
 -11 1 0 -35.8436 27.4809 5
 -11 -1 0 62.5194 59.2831 5
 -11 1 -1 1232.44 213.821 5
 -11 -1 -1 1215.26 224.446 5
 11 1 2 -65.7798 111.743 1
 -11 1 -2 -16.1329 38.243 5
 -11 -1 -2 59.2713 53.7165 5
 -11 1 -3 -17.5863 37.4062 5
 -11 -1 -3 -31.2568 48.3902 5
 11 1 3 -133.02 106.406 1
 -11 -1 -4 649.239 154.882 5
 11 1 4 842.898 229.755 1
 11 -1 5 -26.0803 89.8846 1
 11 1 5 237.584 148.173 1
 11 -1 6 200.512 119.275 1
 11 1 6 42.4214 107.228 1
 11 1 7 177.845 172.502 1
 11 -1 7 207.875 136.376 1
 11 1 8 -102.913 159.355 1
 11 -1 8 6.97361 96.5748 1
 11 -1 9 -54.7788 66.8403 1
 11 1 9 68.334 58.5466 1
 11 -1 10 -126.642 123.583 1
 11 1 10 44.6049 112.279 1
 11 -2 -18 264.803 147.084 2
 -11 -2 17 -178.874 112.755 5
 -11 -2 16 -36.6954 74.5074 5
 -11 2 15 -5.86257 102.109 5
 -11 -2 15 -40.4718 64.4516 5
 -11 2 14 498.992 172.068 5
 -11 -2 14 506.428 175.086 5
 -11 2 13 194.673 110.743 5
 -11 -2 13 87.2152 76.7018 5
 -11 2 12 1517.15 297.459 5
 -11 -2 12 1457.41 271.667 5
 -11 2 11 506.743 175.309 5
 -11 -2 11 254.772 138.816 5
 -11 2 10 75.2692 73.2285 5
 -11 -2 10 5.9846 79.9783 5
 -11 2 9 512.815 158.086 5
 -11 -2 9 678.406 186.871 5
 -11 2 8 1004.01 218.416 5
 -11 -2 8 977.921 221.452 5
 -11 2 7 960.595 209.451 5
 -11 -2 7 758.773 190.893 5
 -11 2 6 540.62 158.927 5
 -11 -2 6 735.28 186.497 5
 -11 2 5 2198.2 309.71 5
 -11 -2 5 2309.06 331.708 5
 -11 2 4 13.7959 42.7343 5
 -11 -2 4 50.0451 48.4883 5
 -11 2 3 9127.59 600.892 5
 -11 -2 3 9449.69 664.002 5
 -11 2 2 2592.99 313.785 5
 -11 -2 2 2303.35 330.805 5
 -11 2 1 92.3612 70.8237 5
 -11 -2 1 -13.4495 71.3687 5
 11 2 0 141.893 100.345 1
 -11 2 0 201.238 92.3321 5
 -11 -2 0 -29.1122 81.5295 5
 -11 2 -1 2508.44 293.404 5
 -11 -2 -1 2304.7 320.95 5
 11 2 1 2326.15 371.218 1
 -11 2 -2 231.854 90.0368 5
 -11 -2 -2 84.4334 74.4678 5
 11 2 2 4.53584 94.9477 1
 -11 2 -3 842.965 160.325 5
 -11 -2 -3 856.386 181.831 5
 11 2 3 528.018 202.139 1
 -11 -2 -4 33.1061 43.3511 5
 11 2 4 -84.5703 89.0027 1
 11 2 5 510.765 198.949 1
 11 2 6 351.777 165.073 1
 11 2 7 939.608 271.948 1
 11 -2 7 801.367 274.259 1
 11 2 8 207.817 148.005 1
 11 -2 8 76.5132 117.912 1
 11 2 9 94.4534 85.2348 1
 11 -2 9 105.901 64.0203 1
 11 -2 10 5.85798 108.81 1
 11 -3 -18 162.265 117.479 2
 -11 -3 17 -66.8646 73.1985 5
 -11 -3 16 147.903 88.2255 5
 -11 -3 15 140 93.0749 5
 -11 3 14 513.213 187.754 5
 -11 -3 14 418.77 159.853 5
 -11 3 13 -5.47385 74.1167 5
 -11 -3 13 160.726 98.0069 5
 -11 3 12 472.718 171.017 5
 -11 -3 12 610.274 179.167 5
 -11 3 11 107.869 92.0131 5
 -11 -3 11 82.4382 62.8225 5
 -11 3 10 164.778 116.449 5
 -11 -3 10 182.687 114.517 5
 -11 3 9 170.384 112.338 5
 -11 -3 9 142.295 73.7128 5
 -11 3 8 2991.96 385.65 5
 -11 -3 8 3433.78 415.018 5
 -11 3 7 -9.92884 81.4447 5
 -11 -3 7 -44.2302 67.3568 5
 11 3 -7 69.9978 38.9229 1
 -11 3 6 2464.01 329.612 5
 -11 -3 6 1938.6 316.89 5
 -11 3 5 120.298 89.9281 5
 -11 -3 5 -55.4088 68.031 5
 -11 3 4 11417.3 686.781 5
 -11 -3 4 12322.3 783.084 5
 -11 3 3 466.417 139.643 5
 -11 -3 3 421.476 157.167 5
 11 3 -3 527.307 160.042 1
 -11 3 2 426.603 143.075 5
 -11 -3 2 279.64 143.56 5
 11 3 -2 120.073 75.3249 1
 -11 3 1 1295.16 219.697 5
 -11 -3 1 1329.24 254.423 5
 11 3 -1 886.315 217.376 1
 -11 3 0 5028.71 421.013 5
 -11 -3 0 4147.17 450.993 5
 11 3 0 4403.73 495.204 1
 -11 3 -1 -4.64488 38.5801 5
 -11 -3 -1 39.3148 74.2705 5
 11 3 1 -77.1434 89.8294 1
 -11 3 -2 -156.358 72.7909 5
 -11 -3 -2 -46.1811 67.442 5
 11 3 2 -76.4914 109.047 1
 11 3 3 649.841 203.285 1
 -11 3 -3 924.446 170.441 5
 -11 -3 -3 626.67 171.018 5
 -11 -3 -4 3264.94 383.925 5
 11 3 4 3359.19 492.048 1
 11 3 5 411.375 197.827 1
 11 3 6 -21.4685 98.5323 1
 11 3 7 -23.4028 76.3809 1
 11 -3 8 911.816 320.146 1
 11 3 8 1210.74 337.403 1
 11 3 9 -242.504 158.114 1
 11 -3 9 157.498 142.161 1
 11 -3 10 -117.674 121.614 1
 11 -4 -18 250.265 157.239 2
 -11 -4 17 252.951 135.807 5
 -11 -4 16 113.845 83.4382 5
 -11 -4 15 802.118 221.345 5
 -11 -4 14 690.267 191.369 5
 -11 4 13 311.176 143.684 5
 -11 -4 13 309.497 144.232 5
 -11 4 12 978.495 246.032 5
 -11 -4 12 1612.74 307.961 5
 -11 4 11 3001.57 425.812 5
 -11 -4 11 3864.52 472.327 5
 -11 4 10 4984.97 533.063 5
 -11 -4 10 5303.07 536.682 5
 -11 4 9 817.22 220.978 5
 -11 -4 9 1083.63 255.558 5
 -11 4 8 44.986 81.8349 5
 -11 -4 8 -18.7099 57.6172 5
 -11 4 7 3372.57 410.412 5
 -11 -4 7 2968.27 404.272 5
 11 4 -7 3011.83 285.465 1
 -11 4 6 15056.1 839.745 5
 -11 -4 6 17040.2 960.097 5
 11 4 -6 15915.3 702.653 1
 -11 4 5 470.954 161.116 5
 -11 -4 5 659.196 203.334 5
 -11 4 4 1210.69 227.639 5
 -11 -4 4 1114.54 251.65 5
 -11 4 3 1747.41 268.236 5
 11 4 -3 2182.16 309.249 1
 -11 -4 3 2048.35 333.838 5
 -11 4 2 5890.96 476.318 5
 -11 -4 2 5679 554.307 5
 11 4 -2 6023.98 536.9 1
 11 4 -1 -3.18333 53.7591 1
 -11 4 1 -13.7431 47.6506 5
 -11 -4 1 -30.8519 61.2221 5
 11 4 0 -93.9307 113.864 1
 -11 4 0 -68.4254 68.9155 5
 -11 -4 0 20.8909 41.9778 5
 -11 4 -1 2795.43 312.337 5
 11 4 1 2468.68 380.152 1
 -11 -4 -1 2346.5 350.292 5
 -11 4 -2 890.335 168.261 5
 11 4 2 854.525 232.2 1
 -11 -4 -2 1038.08 236.941 5
 11 4 3 294.593 136.946 1
 -11 -4 -3 944.735 223.87 5
 -11 -4 -4 3971.97 450.771 5
 11 4 4 3660.5 512.416 1
 11 4 5 466.387 204.948 1
 11 4 6 914.392 275.827 1
 11 4 7 399.242 197.563 1
 11 4 8 52.4861 135.788 1
 11 4 9 173.526 127.169 1
 11 -4 9 352.614 207.495 1
 -11 -4 -9 397.403 226.205 4
 -11 -4 -10 28.2829 79.4859 4
 -11 -4 -11 -51.2237 96.4783 4
 -11 -5 16 383.068 155.094 5
 -11 -5 15 132.295 72.616 5
 -11 -5 14 293.55 137.726 5
 -11 -5 13 2179 355.887 5
 -11 -5 12 3918.86 480.893 5
 -11 5 11 745.26 221.869 5
 -11 -5 11 679.527 214.18 5
 -11 5 10 50.4633 72.999 5
 -11 -5 10 358.245 163.594 5
 -11 5 9 5591.43 555.1 5
 -11 -5 9 6280.8 596.69 5
 -11 5 8 276.875 103.509 5
 -11 -5 8 904.381 230.815 5
 -11 5 7 1516.13 289.05 5
 -11 -5 7 2339.99 368.429 5
 -11 5 6 1042.03 224.971 5
 11 5 -6 1421.76 209.275 1
 -11 5 5 -0.1444 73.0904 5
 -11 -5 5 24.7289 125.682 5
 -11 5 4 -44.3383 97.5166 5
 -11 -5 4 -1.41735 61.074 5
 11 5 -4 13.8074 52.8082 1
 -11 5 3 -79.3175 87.6089 5
 11 5 -3 3.88116 37.1862 1
 -11 -5 3 -35.1265 83.72 5
 -11 5 2 -80.0542 83.1257 5
 11 5 -2 -76.3156 97.0385 1
 -11 -5 2 -78.0101 122.88 5
 -11 5 1 229.496 91.2172 5
 11 5 -1 168.411 102.197 1
 -11 -5 1 119.247 53.8523 5
 -11 5 0 176.634 99.3367 5
 -11 -5 0 55.9726 42.4331 5
 11 5 0 12.5247 76.5967 1
 -11 5 -1 913.788 186.793 5
 -11 -5 -1 984.304 245.304 5
 11 5 1 994.36 244.036 1
 -11 5 -2 1032.26 191.705 5
 -11 -5 -2 1029.26 239.806 5
 11 5 2 1105.41 264.694 1
 -11 -5 -3 3006.11 411.198 5
 11 5 3 3488.17 488.81 1
 -11 -5 -4 113.685 97.018 5
 11 5 4 44.4611 64.0571 1
 11 5 5 1261.15 312.526 1
 11 5 6 2.28253 63.1491 1
 11 5 7 1423.54 349.485 1
 -11 -5 -7 694.959 299.47 4
 11 5 8 -59.6396 81.7073 1
 -11 -5 -8 -8.66003 99.9348 4
 11 -5 9 150.422 159.145 1
 11 5 9 318.823 159.531 1
 -11 -5 -9 564.907 264.337 4
 -11 -5 -10 90.1635 94.0143 4
 -11 -6 16 626.882 203.847 5
 -11 -6 15 508.588 180.183 5
 -11 -6 14 2610.65 396.455 5
 -11 -6 13 230.463 130.277 5
 -11 -6 12 102.4 89.1171 5
 -11 -6 11 166.427 55.3859 5
 -11 -6 10 420.214 132.817 5
 -11 -6 9 2000.18 345.843 5
 -11 6 8 990.093 229.49 5
 -11 -6 8 1027.11 264.818 5
 -11 6 7 108.348 66.0003 5
 -11 -6 7 197.255 94.3461 5
 -11 6 6 2105.91 327.099 5
 -11 -6 6 3020.94 435.959 5
 11 6 -6 2946.1 293.169 1
 -11 6 5 1584.92 276.836 5
 -11 -6 5 1760.54 331.414 5
 -11 6 4 3316.74 397.687 5
 11 6 -4 3731.16 381.581 1
 -11 -6 4 3096.21 443.05 5
 11 6 -3 17.7583 50.1411 1
 -11 6 3 -12.2736 78.7322 5
 -11 -6 3 -129.106 120.28 5
 -11 6 2 3424.51 385.332 5
 -11 -6 2 3804.51 496.81 5
 11 6 -2 3229.74 397.144 1
 -11 6 1 229.295 107.42 5
 -11 -6 1 339.088 166.568 5
 11 6 -1 37.4088 56.4428 1
 -11 6 0 1.87167 51.7846 5
 -11 -6 0 129.043 108.145 5
 11 6 0 -23.4911 86.6215 1
 -11 -6 -1 1224.29 286.022 5
 11 6 1 1015.75 252.186 1
 11 6 2 1488.53 313.818 1
 -11 -6 -2 1691.17 326.654 5
 11 6 3 143.177 120.019 1
 -11 -6 -3 -37.6624 50.0769 5
 11 6 4 496.968 188.686 1
 -11 -6 -4 242.647 115.761 5
 11 6 5 96.8331 88.9809 1
 -11 -6 -5 142.96 89.2186 5
 -11 -6 -5 157.05 163.315 4
 11 6 6 964.598 279.946 1
 -11 -6 -6 1140.64 372.542 4
 11 6 7 250.541 177.734 1
 -11 -6 -7 59.319 118.099 4
 11 6 8 69.95 84.9498 1
 -11 -6 -8 -147.881 179.2 4
 11 6 9 56.4504 65.8122 1
 -11 -6 -9 107.482 129.022 4
 -11 -6 -10 704.474 311.624 4
 -11 -7 16 114.215 102.592 5
 -11 -7 15 167.739 112.904 5
 -11 -7 14 -122.55 95.7615 5
 -11 -7 13 32.231 70.6198 5
 -11 -7 12 1918.21 343.034 5
 -11 -7 11 168.737 110.648 5
 -11 -7 10 178.043 111.982 5
 -11 -7 9 348.71 164.001 5
 -11 -7 8 1556.4 320.52 5
 -11 -7 7 1706.34 337.288 5
 -11 -7 6 2027.79 370.594 5
 -11 -7 5 3933.89 508.058 5
 -11 -7 4 1411.77 314.622 5
 11 7 -4 1455.98 236.529 1
 11 7 -3 1554.33 254.636 1
 -11 -7 3 1015.5 269.225 5
 -11 -7 2 1278.23 288.774 5
 11 7 -2 927.615 206.713 1
 -11 -7 1 4405.58 554.494 5
 11 7 -1 4498.39 483.689 1
 -11 -7 0 6182.32 653.945 5
 11 7 0 6565.4 605.709 1
 -11 -7 -1 2382.23 406.528 5
 11 7 1 1696.55 322.388 1
 -11 -7 -2 768.84 233.571 5
 11 7 2 720.427 231.333 1
 -11 -7 -3 96.2749 108.701 5
 11 7 3 65.5829 62.9269 1
 -11 -7 -4 1316.42 298.99 5
 -11 -7 -4 1273.69 363.517 4
 11 7 4 1651.2 344.807 1
 11 7 5 158.931 104.964 1
 -11 -7 -5 -52.4706 117.752 5
 -11 -7 -5 190.736 165.045 4
 11 7 6 -86.1574 112.046 1
 -11 -7 -6 173.322 170.174 4
 11 7 7 -19.2587 59.7112 1
 -11 -7 -7 101.406 121.738 4
 11 7 8 -37.2089 39.1347 1
 -11 -7 -8 191.986 199.048 4
 -11 -7 -9 -113.356 98.9125 4
 -11 -8 16 92.7483 77.8844 5
 -11 -8 15 153.021 95.2787 5
 -11 -8 14 -43.0556 84.333 5
 -11 -8 13 0.20289 72.0602 5
 -11 -8 12 91.7625 105.939 5
 -11 -8 11 256.193 134.991 5
 -11 -8 10 159.402 129.58 5
 -11 -8 9 476.496 205.119 5
 -11 -8 8 68.3389 93.9039 5
 -11 -8 7 844.927 252.851 5
 -11 -8 6 234.335 158.29 5
 -11 -8 5 1333.89 310.788 5
 -11 -8 4 -22.811 69.6731 5
 -11 -8 3 2273.18 400.692 5
 11 8 -2 227.043 115.708 1
 -11 -8 2 -41.4071 120.84 5
 -11 -8 1 3139.77 475.151 5
 11 8 -1 3532.86 426.851 1
 11 8 0 886.879 220.79 1
 -11 -8 0 545.599 205.87 5
 11 8 1 1292.32 278.203 1
 -11 -8 -1 1029.21 272.794 5
[truncated: 81,813 more chars]
